# Supplementary material for: Characterization of the Heat-Stable Proteome during Seed Germination in Arabidopsis with Special Focus on LEA Proteins
Source: Int J Mol Sci. 2021 Jul 29;22(15):8172. doi: 10.3390/ijms22158172 (PMC8347141; doi:10.3390/ijms22158172)
Supplement: Supplementary file 1 [file ijms-22-08172-s001.zip › Supplemental Table_S4_final_IJMS_revised.xlsx]

## Sheet: Supplemental Table S5
Supplemental Table S4: Proteins in different section of the Venn diagram (Fig. 4A) with their TAIR10 annotation.

## Sheet: a
AGI code	Short_description
AT1G02700
AT1G03680	thioredoxin M-type 1	Note: those highlighted in yellow are missing in either one of the combined time points (36 h together with 48 h; 60 h together with 72 h).
AT1G03880	cruciferin 2
AT1G03890	RmlC-like cupins superfamily protein
AT1G05510	Protein of unknown function (DUF1264)
AT1G07140	Pleckstrin homology (PH) domain superfamily protein
AT1G08830	copper/zinc superoxide dismutase 1
AT1G11360	Adenine nucleotide alpha hydrolases-like superfamily protein
AT1G11910	aspartic proteinase A1
AT1G12310	Calcium-binding EF-hand family protein
AT1G13440	glyceraldehyde-3-phosphate dehydrogenase C2
AT1G13930
AT1G14940	Polyketide cyclase/dehydrase and lipid transport superfamily protein
AT1G14950	Polyketide cyclase/dehydrase and lipid transport superfamily protein
AT1G14980	chaperonin 10
AT1G15340	methyl-CPG-binding domain 10
AT1G16730	unknown protein 6
AT1G16850
AT1G17880	basic transcription factor 3
AT1G18210	Calcium-binding EF-hand family protein
AT1G20620	catalase 3
AT1G21750	PDI-like 1-1
AT1G21880	lysm domain GPI-anchored protein 1 precursor
AT1G22840	CYTOCHROME C-1
AT1G26630	Eukaryotic translation initiation factor 5A-1 (eIF-5A 1) protein
AT1G27950	glycosylphosphatidylinositol-anchored lipid protein transfer 1
AT1G29850	double-stranded DNA-binding family protein
AT1G30230	Glutathione S-transferase, C-terminal-like;Translation elongation factor EF1B/ribosomal protein S6
AT1G31812	acyl-CoA-binding protein 6
AT1G32710	Cytochrome c oxidase, subunit Vib family protein
AT1G47200	WPP domain protein 2
AT1G47540	Scorpion toxin-like knottin superfamily protein
AT1G48130	1-cysteine peroxiredoxin 1
AT1G52380	NUP50 (Nucleoporin 50 kDa) protein
AT1G52690	Late embryogenesis abundant protein (LEA) family protein
AT1G54860	Glycoprotein membrane precursor GPI-anchored
AT1G56340	calreticulin 1a
AT1G62290	Saposin-like aspartyl protease family protein
AT1G62740	stress-inducible protein, putative
AT1G62820	Calcium-binding EF-hand family protein
AT1G65980	thioredoxin-dependent peroxidase 1
AT1G66240	homolog of anti-oxidant 1
AT1G69295	plasmodesmata callose-binding protein 4
AT1G69410	eukaryotic elongation factor 5A-3
AT1G69510	cAMP-regulated phosphoprotein 19-related protein
AT1G71950	Proteinase inhibitor, propeptide
AT1G73230	Nascent polypeptide-associated complex NAC
AT1G75830	low-molecular-weight cysteine-rich 67
AT1G77510	PDI-like 1-2
AT1G77710
AT1G79920	Heat shock protein 70 (Hsp 70) family protein
AT2G03440	nodulin-related protein 1
AT2G04780	FASCICLIN-like arabinoogalactan 7
AT2G15010	Plant thionin
AT2G16600	rotamase CYP 3
AT2G17120	lysm domain GPI-anchored protein 2 precursor
AT2G18040	peptidylprolyl cis/trans isomerase, NIMA-interacting 1
AT2G21060	glycine-rich protein 2B
AT2G21490	dehydrin LEA
AT2G21660	cold, circadian rhythm, and rna binding 2
AT2G21820
AT2G22420	Peroxidase superfamily protein
AT2G23110	Late embryogenesis abundant protein, group 6
AT2G23120	Late embryogenesis abundant protein, group 6
AT2G24020	Uncharacterised BCR, YbaB family COG0718
AT2G24940	membrane-associated progesterone binding protein 2
AT2G25060	early nodulin-like protein 14
AT2G25970	KH domain-containing protein
AT2G28190	copper/zinc superoxide dismutase 2
AT2G28490	RmlC-like cupins superfamily protein
AT2G30410	tubulin folding cofactor A (KIESEL)
AT2G32060	Ribosomal protein L7Ae/L30e/S12e/Gadd45 family protein
AT2G33740	Nitrogen regulatory PII-like, alpha/beta
AT2G35010	thioredoxin O1
AT2G35120	Single hybrid motif superfamily protein
AT2G35635	ubiquitin 7
AT2G36530	Enolase
AT2G36640	embryonic cell protein 63
AT2G37660	NAD(P)-binding Rossmann-fold superfamily protein
AT2G38530	lipid transfer protein 2
AT2G38870	Serine protease inhibitor, potato inhibitor I-type family protein
AT2G40170	Stress induced protein
AT2G42560	late embryogenesis abundant domain-containing protein / LEA domain-containing protein
AT2G43535	Scorpion toxin-like knottin superfamily protein
AT2G44310	Calcium-binding EF-hand family protein
AT2G45470	FASCICLIN-like arabinogalactan protein 8
AT2G47400	CP12 domain-containing protein 1
AT3G02480	Late embryogenesis abundant protein (LEA) family protein
AT3G04720	pathogenesis-related 4
AT3G05020	acyl carrier protein 1
AT3G06050	peroxiredoxin IIF
AT3G06610	DNA-binding enhancer protein-related
AT3G07390	auxin-responsive family protein
AT3G10020
AT3G12390	Nascent polypeptide-associated complex (NAC), alpha subunit family protein
AT3G12490	cystatin B
AT3G12780	phosphoglycerate kinase 1
AT3G12960
AT3G15280
AT3G15670	Late embryogenesis abundant protein (LEA) family protein
AT3G17520	Late embryogenesis abundant protein (LEA) family protein
AT3G20390	endoribonuclease L-PSP family protein
AT3G22640	cupin family protein
AT3G23490	cyanase
AT3G25220	FK506-binding protein 15 kD-1
AT3G46230	heat shock protein 17.4
AT3G52930	Aldolase superfamily protein
AT3G52960	Thioredoxin superfamily protein
AT3G53040	late embryogenesis abundant protein, putative / LEA protein, putative
AT3G53970	proteasome inhibitor-related
AT3G55440	triosephosphate isomerase
AT3G56350	Iron/manganese superoxide dismutase family protein
AT3G63190	ribosome recycling factor, chloroplast precursor
AT4G01900	GLNB1 homolog
AT4G02450	HSP20-like chaperones superfamily protein
AT4G02520	glutathione S-transferase PHI 2
AT4G03520	Thioredoxin superfamily protein
AT4G11600	glutathione peroxidase 6
AT4G13850	glycine-rich RNA-binding protein 2
AT4G15410	serine/threonine protein phosphatase 2A 55 kDa regulatory subunit B prime gamma
AT4G16500	Cystatin/monellin superfamily protein
AT4G16830	Hyaluronan / mRNA binding family
AT4G17520	Hyaluronan / mRNA binding family
AT4G20260	plasma-membrane associated cation-binding protein 1
AT4G21020	Late embryogenesis abundant protein (LEA) family protein
AT4G21860	methionine sulfoxide reductase B 2
AT4G22670	HSP70-interacting protein 1
AT4G24280	chloroplast heat shock protein 70-1
AT4G25050	acyl carrier protein 4
AT4G27140	seed storage albumin 1
AT4G27150	seed storage albumin 2
AT4G27170	seed storage albumin 4
AT4G27520	early nodulin-like protein 2
AT4G28520	cruciferin 3
AT4G30880	Bifunctional inhibitor/lipid-transfer protein/seed storage 2S albumin superfamily protein
AT4G31840	early nodulin-like protein 15
AT4G34870	rotamase cyclophilin 5
AT4G35450	ankyrin repeat-containing protein 2
AT4G37300	maternal effect embryo arrest 59
AT4G38350	Patched family protein
AT4G38740	rotamase CYP 1
AT4G38810	Calcium-binding EF-hand family protein
AT4G39260	cold, circadian rhythm, and RNA binding 1
AT5G01300	PEBP (phosphatidylethanolamine-binding protein) family protein
AT5G02240	NAD(P)-binding Rossmann-fold superfamily protein
AT5G02770
AT5G06760	Late Embryogenesis Abundant 4-5
AT5G07190	seed gene 3
AT5G12140	cystatin-1
AT5G13850	nascent polypeptide-associated complex subunit alpha-like protein 3
AT5G16840	binding partner of acd11 1
AT5G17710	Co-chaperone GrpE family protein
AT5G17920	Cobalamin-independent synthase family protein
AT5G18100	copper/zinc superoxide dismutase 3
AT5G19510	Translation elongation factor EF1B/ribosomal protein S6 family protein
AT5G20500	Glutaredoxin family protein
AT5G20720	chaperonin 20
AT5G21274	calmodulin 6
AT5G23290	prefoldin 5
AT5G23395	Cox19-like CHCH family protein
AT5G25090	early nodulin-like protein 13
AT5G37780	calmodulin 1
AT5G38160	Bifunctional inhibitor/lipid-transfer protein/seed storage 2S albumin superfamily protein
AT5G38170	Bifunctional inhibitor/lipid-transfer protein/seed storage 2S albumin superfamily protein
AT5G38470	Rad23 UV excision repair protein family
AT5G40370	Glutaredoxin family protein
AT5G42020	Heat shock protein 70 (Hsp 70) family protein
AT5G42850	Thioredoxin superfamily protein
AT5G42890	sterol carrier protein 2
AT5G42980	thioredoxin 3
AT5G43060	Granulin repeat cysteine protease family protein
AT5G44120	RmlC-like cupins superfamily protein
AT5G44310	Late embryogenesis abundant protein (LEA) family protein
AT5G45690	Protein of unknown function (DUF1264)
AT5G47210	Hyaluronan / mRNA binding family
AT5G47550	Cystatin/monellin superfamily protein
AT5G50370	Adenylate kinase family protein
AT5G52300	CAP160 protein
AT5G53560	cytochrome B5 isoform E
AT5G54760	Translation initiation factor SUI1 family protein
AT5G55730	FASCICLIN-like arabinogalactan 1
AT5G58070	temperature-induced lipocalin
AT5G58590	RAN binding protein 1
AT5G60390	GTP binding Elongation factor Tu family protein
AT5G63030	Thioredoxin superfamily protein
AT5G63400	adenylate kinase 1
AT5G64080	Bifunctional inhibitor/lipid-transfer protein/seed storage 2S albumin superfamily protein
AT5G66040	sulfurtransferase protein 16
AT5G66170	sulfurtransferase 18
ATCG00490	ribulose-bisphosphate carboxylases

## Sheet: b
AGI code	Short_description
AT1G01320	Tetratricopeptide repeat (TPR)-like superfamily protein
AT1G02780	Ribosomal protein L19e family protein
AT1G04410	Lactate/malate dehydrogenase family protein
AT1G06210	ENTH/VHS/GAT family protein
AT1G06680	photosystem II subunit P-1
AT1G07645	dessication-induced 1VOC superfamily protein
AT1G07890	ascorbate peroxidase 1
AT1G08780	ABI3-interacting protein 3
AT1G09210	calreticulin 1b
AT1G10960	ferredoxin 1
AT1G12080	Vacuolar calcium-binding protein-related
AT1G12270	stress-inducible protein, putative
AT1G15930	Ribosomal protein L7Ae/L30e/S12e/Gadd45 family protein
AT1G16190	Rad23 UV excision repair protein family
AT1G16210
AT1G20440	cold-regulated 47
AT1G20970
AT1G22450	cytochrome C oxidase 6B
AT1G22530	PATELLIN 2
AT1G23100	GroES-like family protein
AT1G26110	decapping 5
AT1G29990	prefoldin 6
AT1G30470	SIT4 phosphatase-associated family protein
AT1G33040	nascent polypeptide-associated complex subunit alpha-like protein 5
AT1G35160	GF14 protein phi chain
AT1G43560	thioredoxin Y2
AT1G47128	Granulin repeat cysteine protease family protein
AT1G47710	Serine protease inhibitor (SERPIN) family protein
AT1G49760	poly(A) binding protein 8
AT1G51510	RNA-binding (RRM/RBD/RNP motifs) family protein
AT1G53240	Lactate/malate dehydrogenase family protein
AT1G53580	glyoxalase II 3
AT1G55265	Protein of unknown function, DUF538
AT1G55490	chaperonin 60 beta
AT1G56070	Ribosomal protein S5/Elongation factor G/III/V family protein
AT1G62480	Vacuolar calcium-binding protein-related
AT1G65010	Plant protein of unknown function (DUF827)
AT1G66070	Translation initiation factor eIF3 subunit
AT1G71730
AT1G74560	NAP1-related protein 1
AT1G74790	catalytics
AT1G75950	S phase kinase-associated protein 1
AT1G76180	Dehydrin family protein
AT1G78150
AT1G79340	metacaspase 4
AT1G79550	phosphoglycerate kinase
AT1G79830	golgin candidate 5
AT2G01190	Octicosapeptide/Phox/Bem1p family protein
AT2G03680	spiral1
AT2G04030	Chaperone protein htpG family protein
AT2G07340	PREFOLDIN 1
AT2G14740	vaculolar sorting receptor 3
AT2G14880	SWIB/MDM2 domain superfamily protein
AT2G17190	ubiquitin family protein
AT2G17200	ubiquitin family protein
AT2G17390	ankyrin repeat-containing 2B
AT2G17870	cold shock domain protein 3
AT2G19730	Ribosomal L28e protein family
AT2G19760	profilin 1
AT2G20270	Thioredoxin superfamily protein
AT2G20420	ATP citrate lyase (ACL) family protein
AT2G20760	Clathrin light chain protein
AT2G21170	triosephosphate isomerase
AT2G26590	regulatory particle non-ATPase 13
AT2G27510	ferredoxin 3
AT2G27710	60S acidic ribosomal protein family
AT2G27720	60S acidic ribosomal protein family
AT2G27730	copper ion binding
AT2G28000	chaperonin-60alpha
AT2G28290	P-loop containing nucleoside triphosphate hydrolases superfamily protein
AT2G29530	Tim10/DDP family zinc finger protein
AT2G30060	Pleckstrin homology (PH) domain superfamily protein
AT2G31570	glutathione peroxidase 2
AT2G31670	Stress responsive alpha-beta barrel domain protein
AT2G32240
AT2G33150	peroxisomal 3-ketoacyl-CoA thiolase 3
AT2G37220	RNA-binding (RRM/RBD/RNP motifs) family protein
AT2G38040	acetyl Co-enzyme a carboxylase carboxyltransferase alpha subunit
AT2G38540	lipid transfer protein 1
AT2G40060	Clathrin light chain protein
AT2G43090	Aconitase/3-isopropylmalate dehydratase protein
AT2G43510	trypsin inhibitor protein 1
AT2G43560	FKBP-like peptidyl-prolyl cis-trans isomerase family protein
AT2G44060	Late embryogenesis abundant protein, group 2
AT2G44650	chloroplast chaperonin 10
AT2G47470	thioredoxin family protein
AT3G01390	vacuolar membrane ATPase 10
AT3G02540	Rad23 UV excision repair protein family
AT3G04610	RNA-binding KH domain-containing protein
AT3G04710	ankyrin repeat family protein
AT3G04790	Ribose 5-phosphate isomerase, type A protein
AT3G05900	neurofilament protein-related
AT3G08770	lipid transfer protein 6
AT3G09200	Ribosomal protein L10 family protein
AT3G09500	Ribosomal L29 family protein
AT3G09840	cell division cycle 48
AT3G09980	Family of unknown function (DUF662)
AT3G10850	Metallo-hydrolase/oxidoreductase superfamily protein
AT3G13460	evolutionarily conserved C-terminal region 2
AT3G15360	thioredoxin M-type 4
AT3G15640	Rubredoxin-like superfamily protein
AT3G15660	glutaredoxin 4
AT3G15950	DNA topoisomerase-related
AT3G15970	NUP50 (Nucleoporin 50 kDa) protein
AT3G16420	PYK10-binding protein 1
AT3G16640	translationally controlled tumor protein
AT3G17390	S-adenosylmethionine synthetase family protein
AT3G18420	Protein prenylyltransferase superfamily protein
AT3G21720	isocitrate lyase
AT3G23830	glycine-rich RNA-binding protein 4
AT3G23990	heat shock protein 60
AT3G25230	rotamase FKBP 1
AT3G27850	ribosomal protein L12-C
AT3G28940	AIG2-like (avirulence induced gene) family protein
AT3G44590	60S acidic ribosomal protein family
AT3G45310	Cysteine proteinases superfamily protein
AT3G46940	DUTP-PYROPHOSPHATASE-LIKE 1
AT3G48990	AMP-dependent synthetase and ligase family protein
AT3G49010	breast basic conserved 1
AT3G49470	nascent polypeptide-associated complex subunit alpha-like protein 2
AT3G51730	saposin B domain-containing protein
AT3G51780	BCL-2-associated athanogene 4
AT3G51890	Clathrin light chain protein
AT3G52150	RNA-binding (RRM/RBD/RNP motifs) family protein
AT3G52300	ATP synthase D chain, mitochondrial
AT3G52380	chloroplast RNA-binding protein 33
AT3G53430	Ribosomal protein L11 family protein
AT3G53460	chloroplast RNA-binding protein 29
AT3G54760	dentin sialophosphoprotein-related
AT3G54960	PDI-like 1-3
AT3G55280	ribosomal protein L23AB
AT3G56310	Melibiase family protein
AT3G56490	HIS triad family protein 3
AT3G62530	ARM repeat superfamily protein
AT4G02510	translocon at the outer envelope membrane of chloroplasts 159
AT4G04210	plant UBX domain containing protein 4
AT4G04950	thioredoxin family protein
AT4G08390	stromal ascorbate peroxidase
AT4G09320	Nucleoside diphosphate kinase family protein
AT4G09800	S18 ribosomal protein
AT4G10480	Nascent polypeptide-associated complex (NAC), alpha subunit family protein
AT4G11150	vacuolar ATP synthase subunit E1
AT4G11740	Ubiquitin-like superfamily protein
AT4G12910	serine carboxypeptidase-like 20
AT4G13200
AT4G17330	G2484-1 protein
AT4G18480	P-loop containing nucleoside triphosphate hydrolases superfamily protein
AT4G20360	RAB GTPase homolog E1B
AT4G20850	tripeptidyl peptidase ii
AT4G21090	MITOCHONDRIAL FERREDOXIN 2
AT4G21280	photosystem II subunit QA
AT4G23680	Polyketide cyclase/dehydrase and lipid transport superfamily protein
AT4G24770	31-kDa RNA binding protein
AT4G26780	Co-chaperone GrpE family protein
AT4G28080	Tetratricopeptide repeat (TPR)-like superfamily protein
AT4G28660	photosystem II reaction center PSB28 protein
AT4G29060	elongation factor Ts family protein
AT4G29350	profilin 2
AT4G32720	La protein 1
AT4G32915
AT4G35090	catalase 2
AT4G36020	cold shock domain protein 1
AT4G36700	RmlC-like cupins superfamily protein
AT4G36880	cysteine proteinase1
AT4G36910	Cystathionine beta-synthase (CBS) family protein
AT4G37870	phosphoenolpyruvate carboxykinase 1
AT4G37910	mitochondrial heat shock protein 70-1
AT4G38630	regulatory particle non-ATPase 10
AT4G38710	glycine-rich protein
AT4G39200	Ribosomal protein S25 family protein
AT4G39680	SAP domain-containing protein
AT4G39860
AT5G02450	Ribosomal protein L36e family protein
AT5G02500	heat shock cognate protein 70-1
AT5G03660	Family of unknown function (DUF662)
AT5G04430	binding to TOMV RNA 1L (long form)
AT5G04740	ACT domain-containing protein
AT5G07460	peptidemethionine sulfoxide reductase 2
AT5G08100	N-terminal nucleophile aminohydrolases (Ntn hydrolases) superfamily protein
AT5G09390	CD2-binding protein-related
AT5G09590	mitochondrial HSO70 2
AT5G09620	Octicosapeptide/Phox/Bem1p family protein
AT5G09810	actin 7
AT5G14540	Protein of unknown function (DUF1421)
AT5G14910	Heavy metal transport/detoxification superfamily protein
AT5G16620	hydroxyproline-rich glycoprotein family protein
AT5G16880	Target of Myb protein 1
AT5G20920	eukaryotic translation initiation factor 2 beta subunit
AT5G26667	P-loop containing nucleoside triphosphate hydrolases superfamily protein
AT5G37475	Translation initiation factor eIF3 subunit
AT5G38480	general regulatory factor 3
AT5G39570
AT5G42220	Ubiquitin-like superfamily protein
AT5G42950	GYF domain-containing protein
AT5G44460	calmodulin like 43
AT5G46750	ARF-GAP domain 9
AT5G46960	Plant invertase/pectin methylesterase inhibitor superfamily protein
AT5G48480	Lactoylglutathione lyase / glyoxalase I family protein
AT5G48580	FK506- and rapamycin-binding protein 15 kD-2
AT5G49910	chloroplast heat shock protein 70-2
AT5G50250	chloroplast RNA-binding protein 31B
AT5G50920	CLPC homologue 1
AT5G51040
AT5G52200	phosphoprotein phosphatase inhibitors
AT5G53400	HSP20-like chaperones superfamily protein
AT5G54430	Adenine nucleotide alpha hydrolases-like superfamily protein
AT5G54810	tryptophan synthase beta-subunit 1
AT5G55160	small ubiquitin-like modifier 2
AT5G55200	Co-chaperone GrpE family protein
AT5G56030	heat shock protein 81-2
AT5G56260	Ribonuclease E inhibitor RraA/Dimethylmenaquinone methyltransferase
AT5G56670	Ribosomal protein S30 family protein
AT5G57290	60S acidic ribosomal protein family
AT5G60640	PDI-like 1-4
AT5G60980	Nuclear transport factor 2 (NTF2) family protein with RNA binding (RRM-RBD-RNP motifs) domain
AT5G61030	glycine-rich RNA-binding protein 3
AT5G63980	Inositol monophosphatase family protein
AT5G64130	cAMP-regulated phosphoprotein 19-related protein
AT5G64350	FK506-binding protein 12
AT5G64430	Octicosapeptide/Phox/Bem1p family protein
AT5G66030	Golgi-localized GRIP domain-containing protein
AT5G66570	PS II oxygen-evolving complex 1

## Sheet: c
AGI code	Short_description
AT4G38680	glycine rich protein 2

## Sheet: d
AGI code	Short_description
AT1G03350	BSD domain-containing protein
AT1G03870	FASCICLIN-like arabinoogalactan 9
AT1G06190	Rho termination factor
AT1G07320	ribosomal protein L4
AT1G09310	Protein of unknown function, DUF538
AT1G11930	Predicted pyridoxal phosphate-dependent enzyme, YBL036C type
AT1G13020	eukaryotic initiation factor 4B2
AT1G13690	ATPase E1
AT1G16080
AT1G16880	uridylyltransferase-related
AT1G18080	Transducin/WD40 repeat-like superfamily protein
AT1G20450	Dehydrin family protein
AT1G20760	Calcium-binding EF hand family protein
AT1G21380	Target of Myb protein 1
AT1G21630	Calcium-binding EF hand family protein
AT1G22300	general regulatory factor 10
AT1G24020	MLP-like protein 423
AT1G29090	Cysteine proteinases superfamily protein
AT1G33140	Ribosomal protein L6 family
AT1G33680	KH domain-containing protein
AT1G42480
AT1G42970	glyceraldehyde-3-phosphate dehydrogenase B subunit
AT1G45145	thioredoxin H-type 5
AT1G47420	succinate dehydrogenase 5
AT1G50010	tubulin alpha-2 chain
AT1G52670	Single hybrid motif superfamily protein
AT1G54410	dehydrin family protein
AT1G55260	Bifunctional inhibitor/lipid-transfer protein/seed storage 2S albumin superfamily protein
AT1G55480	protein containing PDZ domain, a K-box domain, and a TPR region
AT1G55805	BolA-like family protein
AT1G60950	2Fe-2S ferredoxin-like superfamily protein
AT1G61900
AT1G62380	ACC oxidase 2
AT1G62660	Glycosyl hydrolases family 32 protein
AT1G64640	early nodulin-like protein 8
AT1G65260	plastid transcriptionally active 4
AT1G65700	Small nuclear ribonucleoprotein family protein
AT1G67090	ribulose bisphosphate carboxylase small chain 1A
AT1G70600	Ribosomal protein L18e/L15 superfamily protein
AT1G72150	PATELLIN 1
AT1G72370	40s ribosomal protein SA
AT1G74050	Ribosomal protein L6 family protein
AT1G74230	glycine-rich RNA-binding protein 5
AT1G76030	ATPase, V1 complex, subunit B protein
AT1G76810	eukaryotic translation initiation factor 2 (eIF-2) family protein
AT1G77630	Peptidoglycan-binding LysM domain-containing protein
AT1G79850	ribosomal protein S17
AT1G80480	plastid transcriptionally active 17
AT2G01250	Ribosomal protein L30/L7 family protein
AT2G03420
AT2G04700	ferredoxin thioredoxin reductase catalytic beta chain family protein
AT2G05710	aconitase 3
AT2G10940	Bifunctional inhibitor/lipid-transfer protein/seed storage 2S albumin superfamily protein
AT2G13820	Bifunctional inhibitor/lipid-transfer protein/seed storage 2S albumin superfamily protein
AT2G18020	Ribosomal protein L2 family
AT2G19480	nucleosome assembly protein 1;2
AT2G20520	FASCICLIN-like arabinogalactan 6
AT2G21045	Rhodanese/Cell cycle control phosphatase superfamily protein
AT2G21530	SMAD/FHA domain-containing protein
AT2G21620	Adenine nucleotide alpha hydrolases-like superfamily protein
AT2G22170	Lipase/lipooxygenase, PLAT/LH2 family protein
AT2G23820	Metal-dependent phosphohydrolase
AT2G24060	Translation initiation factor 3 protein
AT2G26570	Plant protein of unknown function (DUF827)
AT2G26670	Plant haem oxygenase (decyclizing) family protein
AT2G30620	winged-helix DNA-binding transcription factor family protein
AT2G30930
AT2G32730	26S proteasome regulatory complex, non-ATPase subcomplex, Rpn2/Psmd1 subunit
AT2G33410	RNA-binding (RRM/RBD/RNP motifs) family protein
AT2G33430	differentiation and greening-like 1
AT2G34640	plastid transcriptionally active 12
AT2G35880	TPX2 (targeting protein for Xklp2) protein family
AT2G38140	plastid-specific ribosomal protein 4
AT2G38230	pyridoxine biosynthesis 1.1
AT2G39730	rubisco activase
AT2G40300	ferritin 4
AT2G41740	villin 2
AT2G43810	Small nuclear ribonucleoprotein family protein
AT2G43910	HARMLESS TO OZONE LAYER 1
AT2G44790	uclacyanin 2
AT2G44920	Tetratricopeptide repeat (TPR)-like superfamily protein
AT2G47730	glutathione S-transferase phi 8
AT3G02180	SPIRAL1-like3
AT3G04920	Ribosomal protein S24e family protein
AT3G07470	Protein of unknown function, DUF538
AT3G07660	Kinase-related protein of unknown function (DUF1296)
AT3G09820	adenosine kinase 1
AT3G09890	Ankyrin repeat family protein
AT3G10920	manganese superoxide dismutase 1
AT3G11630	Thioredoxin superfamily protein
AT3G11780	MD-2-related lipid recognition domain-containing protein / ML domain-containing protein
AT3G13235	ubiquitin family protein
AT3G13470	TCP-1/cpn60 chaperonin family protein
AT3G13930	Dihydrolipoamide acetyltransferase, long form protein
AT3G14067	Subtilase family protein
AT3G15190	chloroplast 30S ribosomal protein S20, putative
AT3G15260	Protein phosphatase 2C family protein
AT3G16080	Zinc-binding ribosomal protein family protein
AT3G19390	Granulin repeat cysteine protease family protein
AT3G23450
AT3G25520	ribosomal protein L5
AT3G26400	eukaryotic translation initiation factor 4B1
AT3G26650	glyceraldehyde 3-phosphate dehydrogenase A subunit
AT3G32980	Peroxidase superfamily protein
AT3G47070
AT3G47650	DnaJ/Hsp40 cysteine-rich domain superfamily protein
AT3G48350	Cysteine proteinases superfamily protein
AT3G50820	photosystem II subunit O-2
AT3G52200	Dihydrolipoamide acetyltransferase, long form protein
AT3G53580	diaminopimelate epimerase family protein
AT3G56240	copper chaperone
AT3G56910	plastid-specific 50S ribosomal protein 5
AT3G57410	villin 3
AT3G59540	Ribosomal L38e protein family
AT3G59980	Nucleic acid-binding, OB-fold-like protein
AT3G60210	GroES-like family protein
AT3G60240	eukaryotic translation initiation factor 4G
AT3G60750	Transketolase
AT3G62030	rotamase CYP 4
AT3G63540	Mog1/PsbP/DUF1795-like photosystem II reaction center PsbP family protein
AT4G01290
AT4G02530	chloroplast thylakoid lumen protein
AT4G05180	photosystem II subunit Q-2
AT4G08280	Thioredoxin superfamily protein
AT4G09000	general regulatory factor 1
AT4G10300	RmlC-like cupins superfamily protein
AT4G10840	Tetratricopeptide repeat (TPR)-like superfamily protein
AT4G11010	nucleoside diphosphate kinase 3
AT4G12730	FASCICLIN-like arabinogalactan 2
AT4G12770	Chaperone DnaJ-domain superfamily protein
AT4G13940	S-adenosyl-L-homocysteine hydrolase
AT4G14300	RNA-binding (RRM/RBD/RNP motifs) family protein
AT4G14890	2Fe-2S ferredoxin-like superfamily protein
AT4G15545
AT4G15790
AT4G15802	heat shock factor binding protein
AT4G17890	ARF-GAP domain 8
AT4G23670	Polyketide cyclase/dehydrase and lipid transport superfamily protein
AT4G23710	vacuolar ATP synthase subunit G2
AT4G25130	peptide met sulfoxide reductase 4
AT4G25260	Plant invertase/pectin methylesterase inhibitor superfamily protein
AT4G26110	nucleosome assembly protein1;1
AT4G26630	DEK domain-containing chromatin associated protein
AT4G28300	Protein of unknown function (DUF1421)
AT4G29160	SNF7 family protein
AT4G30160	villin 4
AT4G31700	ribosomal protein S6
AT4G32330	TPX2 (targeting protein for Xklp2) protein family
AT4G32930
AT4G33640
AT4G36945	PLC-like phosphodiesterases superfamily protein
AT4G39090	Papain family cysteine protease
AT5G01600	ferretin 1
AT5G01800	saposin B domain-containing protein
AT5G03850	Nucleic acid-binding, OB-fold-like protein
AT5G06290	2-cysteine peroxiredoxin B
AT5G07090	Ribosomal protein S4 (RPS4A) family protein
AT5G08280	hydroxymethylbilane synthase
AT5G09650	pyrophosphorylase 6
AT5G11710	ENTH/VHS family protein
AT5G13980	Glycosyl hydrolase family 38 protein
AT5G15970	stress-responsive protein (KIN2) / stress-induced protein (KIN2) / cold-responsive protein (COR6.6) / cold-regulated protein (COR6.6)
AT5G16390	chloroplastic acetylcoenzyme A carboxylase 1
AT5G16710	dehydroascorbate reductase 1
AT5G16730	Plant protein of unknown function (DUF827)
AT5G17070
AT5G20290	Ribosomal protein S8e family protein
AT5G20630	germin 3
AT5G23820	MD-2-related lipid recognition domain-containing protein
AT5G25070
AT5G26000	thioglucoside glucohydrolase 1
AT5G28050	Cytidine/deoxycytidylate deaminase family protein
AT5G37600	glutamine synthase clone R1
AT5G38420	Ribulose bisphosphate carboxylase (small chain) family protein
AT5G40450
AT5G40950	ribosomal protein large subunit 27
AT5G42070
AT5G43960	Nuclear transport factor 2 (NTF2) family protein with RNA binding (RRM-RBD-RNP motifs) domain
AT5G44130	FASCICLIN-like arabinogalactan protein 13 precursor
AT5G44610	microtubule-associated protein 18
AT5G45680	FK506-binding protein 13
AT5G45930	magnesium chelatase i2
AT5G47030	ATPase, F1 complex, delta/epsilon subunit
AT5G48485	Bifunctional inhibitor/lipid-transfer protein/seed storage 2S albumin superfamily protein
AT5G48490	Bifunctional inhibitor/lipid-transfer protein/seed storage 2S albumin superfamily protein
AT5G51700	protein binding;zinc ion binding
AT5G52650	RNA binding Plectin/S10 domain-containing protein
AT5G52840	NADH-ubiquinone oxidoreductase-related
AT5G53140	Protein phosphatase 2C family protein
AT5G53490	Tetratricopeptide repeat (TPR)-like superfamily protein
AT5G53620
AT5G54310	ARF-GAP domain 5
AT5G55220	trigger factor type chaperone family protein
AT5G56360	calmodulin-binding protein
AT5G56710	Ribosomal protein L31e family protein
AT5G59950	RNA-binding (RRM/RBD/RNP motifs) family protein
AT5G61130	plasmodesmata callose-binding protein 1
AT5G62700	tubulin beta chain 3
AT5G65220	Ribosomal L29 family protein
AT5G67360	Subtilase family protein

## Sheet: e
AGI code	Short_description
AT1G61570	translocase of the inner mitochondrial membrane 13
AT3G26060	Thioredoxin superfamily protein

## Sheet: f
AGI code	Short_description
AT1G79210	N-terminal nucleophile aminohydrolases (Ntn hydrolases) superfamily protein
AT3G53560	Tetratricopeptide repeat (TPR)-like superfamily protein
AT3G58600	Adaptin ear-binding coat-associated protein 1 NECAP-1
AT4G09040	RNA-binding (RRM/RBD/RNP motifs) family protein

## Sheet: g
AGI code	Short_description
AT1G03475	Coproporphyrinogen III oxidase
AT1G03600	photosystem II family protein
AT1G05010	ethylene-forming enzyme
AT1G05385	photosystem II 11 kDa protein-related
AT1G08680	ARF GAP-like zinc finger-containing protein ZIGA4
AT1G09130	ATP-dependent caseinolytic (Clp) protease/crotonase family protein
AT1G09780	Phosphoglycerate mutase, 2,3-bisphosphoglycerate-independent
AT1G12250	Pentapeptide repeat-containing protein
AT1G12520	copper chaperone for SOD1
AT1G12800	Nucleic acid-binding, OB-fold-like protein
AT1G13280	allene oxide cyclase 4
AT1G14210	Ribonuclease T2 family protein
AT1G14320	Ribosomal protein L16p/L10e family protein
AT1G17220	Translation initiation factor 2, small GTP-binding protein
AT1G20010	tubulin beta-5 chain
AT1G31730	Adaptin family protein
AT1G32990	plastid ribosomal protein l11
AT1G34430	2-oxoacid dehydrogenases acyltransferase family protein
AT1G43670	Inositol monophosphatase family protein
AT1G48030	mitochondrial lipoamide dehydrogenase 1
AT1G50900	Ankyrin repeat family protein
AT1G56500	haloacid dehalogenase-like hydrolase family protein
AT1G57720	Translation elongation factor EF1B, gamma chain
AT1G63610
AT1G63940	monodehydroascorbate reductase 6
AT1G65290	mitochondrial acyl carrier protein 2
AT1G65930	cytosolic NADP+-dependent isocitrate dehydrogenase
AT1G70830	MLP-like protein 28
AT1G70880	Polyketide cyclase/dehydrase and lipid transport superfamily protein
AT1G70890	MLP-like protein 43
AT1G72230	Cupredoxin superfamily protein
AT1G73260	kunitz trypsin inhibitor 1
AT1G76080	chloroplastic drought-induced stress protein of 32 kD
AT1G78380	glutathione S-transferase TAU 19
AT1G78830	Curculin-like (mannose-binding) lectin family protein
AT2G02160	CCCH-type zinc finger family protein
AT2G13360	alanine:glyoxylate aminotransferase
AT2G30695
AT2G31610	Ribosomal protein S3 family protein
AT2G38380	Peroxidase superfamily protein
AT2G40490	Uroporphyrinogen decarboxylase
AT2G40880	cystatin A
AT2G44300	Bifunctional inhibitor/lipid-transfer protein/seed storage 2S albumin superfamily protein
AT3G01480	cyclophilin 38
AT3G01500	carbonic anhydrase 1
AT3G02730	thioredoxin F-type 1
AT3G02740	Eukaryotic aspartyl protease family protein
AT3G04400	Ribosomal protein L14p/L23e family protein
AT3G05560	Ribosomal L22e protein family
AT3G09260	Glycosyl hydrolase superfamily protein
AT3G09680	Ribosomal protein S12/S23 family protein
AT3G11050	ferritin 2
AT3G14415	Aldolase-type TIM barrel family protein
AT3G16400	nitrile specifier protein 1
AT3G16450	Mannose-binding lectin superfamily protein
AT3G23570	alpha/beta-Hydrolases superfamily protein
AT3G23600	alpha/beta-Hydrolases superfamily protein
AT3G25920	ribosomal protein L15
AT3G26450	Polyketide cyclase/dehydrase and lipid transport superfamily protein
AT3G26740	CCR-like
AT3G45190	SIT4 phosphatase-associated family protein
AT3G48420	Haloacid dehalogenase-like hydrolase (HAD) superfamily protein
AT3G49910	Translation protein SH3-like family protein
AT3G54170	FKBP12 interacting protein 37
AT3G55800	sedoheptulose-bisphosphatase
AT3G56090	ferritin 3
AT3G58610	ketol-acid reductoisomerase
AT3G62410	CP12 domain-containing protein 2
AT4G01940	NFU domain protein 1
AT4G04840	methionine sulfoxide reductase B6
AT4G09650	ATP synthase delta-subunit gene
AT4G13930	serine hydroxymethyltransferase 4
AT4G14880	O-acetylserine (thiol) lyase (OAS-TL) isoform A1
AT4G18370	DEGP protease 5
AT4G24190	Chaperone protein htpG family protein
AT4G31880
AT4G32590	2Fe-2S ferredoxin-like superfamily protein
AT4G33500	Protein phosphatase 2C family protein
AT4G34120	Cystathionine beta-synthase (CBS) family protein
AT4G37930	serine transhydroxymethyltransferase 1
AT4G38970	fructose-bisphosphate aldolase 2
AT5G03420	5'-AMP-activated protein kinase-related
AT5G03860	malate synthase
AT5G07440	glutamate dehydrogenase 2
AT5G12110	Glutathione S-transferase, C-terminal-like;Translation elongation factor EF1B/ribosomal protein S6
AT5G15200	Ribosomal protein S4
AT5G16400	thioredoxin F2
AT5G19230	Glycoprotein membrane precursor GPI-anchored
AT5G19370	rhodanese-like domain-containing protein / PPIC-type PPIASE domain-containing protein
AT5G30510	ribosomal protein S1
AT5G35630	glutamine synthetase 2
AT5G38430	Ribulose bisphosphate carboxylase (small chain) family protein
AT5G39730	AIG2-like (avirulence induced gene) family protein
AT5G47840	adenosine monophosphate kinase
AT5G51110	Transcriptional coactivator/pterin dehydratase
AT5G51720	2 iron, 2 sulfur cluster binding
AT5G54160	O-methyltransferase 1
AT5G55190	RAN GTPase 3
AT5G55280	homolog of bacterial cytokinesis Z-ring protein FTSZ 1-1
AT5G59850	Ribosomal protein S8 family protein
AT5G59880	actin depolymerizing factor 3
AT5G60360	aleurain-like protease
AT5G62300	Ribosomal protein S10p/S20e family protein
AT5G63310	nucleoside diphosphate kinase 2
AT5G63570	glutamate-1-semialdehyde-2,1-aminomutase
AT5G64040	photosystem I reaction center subunit PSI-N, chloroplast, putative / PSI-N, putative (PSAN)
ATCG00120	ATP synthase subunit alpha
ATCG00480	ATP synthase subunit beta
ATCG01060	iron-sulfur cluster binding;electron carriers;4 iron, 4 sulfur cluster binding
ATCG01240	ribosomal protein S7

## Sheet: h
AGI code	Short_description
AT1G03120	responsive to abscisic acid 28
AT1G14930	Polyketide cyclase/dehydrase and lipid transport superfamily protein
AT1G15230
AT1G16030	heat shock protein 70B
AT1G52560	HSP20-like chaperones superfamily protein
AT1G54870	NAD(P)-binding Rossmann-fold superfamily protein
AT2G18370	Bifunctional inhibitor/lipid-transfer protein/seed storage 2S albumin superfamily protein
AT2G38880	nuclear factor Y, subunit B1
AT3G12580	heat shock protein 70
AT3G15790	methyl-CPG-binding domain 11
AT3G21380	Mannose-binding lectin superfamily protein
AT3G22490	Seed maturation protein
AT3G22500	Seed maturation protein
AT3G50980	dehydrin xero 1
AT3G51810	Stress induced protein
AT3G60900	FASCICLIN-like arabinogalactan-protein 10
AT4G25580	CAP160 protein
AT4G27530
AT4G35570	high mobility group B5
AT4G36600	Late embryogenesis abundant (LEA) protein
AT5G12030	heat shock protein 17.6A
AT5G40420	oleosin 2
AT5G55410	Bifunctional inhibitor/lipid-transfer protein/seed storage 2S albumin superfamily protein

## Sheet: i
AGI code	Short_description
AT1G08370	decapping 1
AT1G29980	Protein of unknown function, DUF642
AT1G36730	Translation initiation factor IF2/IF5
AT1G65090
AT2G03850	Late embryogenesis abundant protein (LEA) family protein
AT2G29500	HSP20-like chaperones superfamily protein
AT2G36460	Aldolase superfamily protein
AT2G40570	initiator tRNA phosphoribosyl transferase family protein
AT3G05070
AT3G05530	regulatory particle triple-A ATPase 5A
AT3G06035	Glycoprotein membrane precursor GPI-anchored
AT3G18780	actin 2
AT3G27310	plant UBX domain-containing protein 1
AT3G51550	Malectin/receptor-like protein kinase family protein
AT3G63460	transducin family protein / WD-40 repeat family protein
AT4G11260	phosphatase-related
AT4G12400	stress-inducible protein, putative
AT4G20050	Pectin lyase-like superfamily protein
AT5G01870	Bifunctional inhibitor/lipid-transfer protein/seed storage 2S albumin superfamily protein
AT5G10860	Cystathionine beta-synthase (CBS) family protein
AT5G17550	peroxin 19-2
AT5G22470	NAD+ ADP-ribosyltransferases;NAD+ ADP-ribosyltransferases
AT5G39720	avirulence induced gene 2 like protein
AT5G55135
AT5G57870	MIF4G domain-containing protein / MA3 domain-containing protein

[truncated: 5 more sheets: j, k, l, m, n]
