# Supplementary material for: Characterization of the Heat-Stable Proteome during Seed Germination in Arabidopsis with Special Focus on LEA Proteins
Source: Int J Mol Sci. 2021 Jul 29;22(15):8172. doi: 10.3390/ijms22158172 (PMC8347141; doi:10.3390/ijms22158172)
Supplement: Supplementary file 1 [file ijms-22-08172-s001.zip › Supplementary Tables_final_IJMS_new.xlsx]

## Sheet: Supplemental Table S1
Supplemental Table S1: Mass-spectral intensities of metabolites normalized to the internal standard 13C6-sorbitol and dry weigh in dry seeds (DS), germinating seeds and seedlings at indicated time points after imbibition. Known and potential contaminants were removed from the data set. Data imputation is not shown.
Class	Name	Derivate	Normalized mass intensities of samples from different time points after imbibition (n = 5)
			DS_1	DS_2	DS_3	DS_4	DS_5	24 h_1	24 h_2	24 h_3	24 h _4	24 h_5	36 h_1	36 h_2	36 h_3	36 h_4	36 h_5	48 h_1	48 h_2	48 h_3	48 h_4	48 h_5	60 h_1	60 h_2	60 h_3	60 h_4	60 h_5	72 h_1	72 h_2	72 h_3	72 h_4	72 h_5
Acids	Azelaic acid	Azelaic acid (2TMS)	0.00429222	0.00426037	0.00416067	0.00477883	0.00382287	0.00223633	0.00210659	0.00236067	0.00325379	0.00314245	0.00982245	0.00774806	0.00647254	0.0256858	0.0102599	0.0449391	0.0284239	0.0270025	0.0418077	0.0377073	0.0751304	0.0329872	0.0755085	0.0646217	0.0569234	0.0807684	0.10587	0.0888645	0.0874122	0.105278
Acids	Benzoic acid	Benzoic acid (1TMS)	0.0167069	0.0135318	0.0137086	0.0148662	0.011342	0.00904137	0.0108918	0.00863091	0.0125828	0.00961181	0.0100371	0.00785891	0.00881559	0.00895465	0.00868168	0.0107704	0.0108477	0.00867931	0.00911183	0.009543	0.021352	0.0193151	0.0220876	0.0196467	0.0184576	0.0305983	0.0276487	0.029085	0.0259688	0.0312589
Acids	Benzoic acid, 3,4-dihydroxy-	Benzoic acid, 3,4-dihydroxy- (3TMS)	0.0163475	0.016004	0.0171143	0.0179061	0.015711	0.00678481	0.00818742	0.00948248	0.0088233	0.00828997	NA	0.00750949	0.00820343	0.0164206	0.0109454	NA	NA	NA	NA	NA	NA	NA	0.0198568	NA	0.0166153	NA	NA	NA	NA	NA
Acids	Citric acid	Citric acid (4TMS)	0.0165906	0.0184663	0.0174342	0.0169246	0.0144599	0.0108828	0.0121124	0.00943349	0.0128818	0.0114108	0.00840741	0.00807325	0.0100285	0.0101104	0.00796161	0.0088456	0.0102923	0.010366	0.0100892	0.00854784	0.0110824	0.00795544	0.0115229	0.00724163	0.00611621	0.012449	0.00889499	0.00942844	0.00929882	0.0096682
Acids	Fumaric acid	Fumaric acid (2TMS)	0.0167069	0.0153239	0.0143086	0.0177391	0.0123046	0.000856356	0.00138625	0.00105414	0.00113179	0.000976208	0.0010301	0.000935802	0.000877125	0.000944216	0.00102999	0.00106053	0.00122485	0.00107855	0.00105821	0.000926421	0.0013324	0.00110276	0.00164573	0.00170178	0.00136792	0.00307565	0.00226918	0.002408	0.0030734	0.00298121
Acids	Glutaric acid, 2-hydroxy-	Glutaric acid, 2-hydroxy- (3TMS)	0.0161233	0.0157788	0.0177565	0.0165239	0.0128816	0.0128734	0.0187737	0.0152441	0.015435	0.0162559	0.0185654	0.0149856	0.0175977	0.0166948	0.0195525	0.0263826	0.0250931	0.0219048	0.0222506	0.0202831	0.037917	0.0264105	0.0344361	0.0221192	0.0232681	0.0457142	0.0314594	0.0383415	0.0319777	0.041173
Acids	Glutaric acid, 2-oxo-	Glutaric acid, 2-oxo- (1MEOX) (2TMS) MP	0.00192042	0.000887497	0.00219949	0.00280211	0.00205814	0.00328287	0.00501087	0.00397705	0.00603925	0.00619764	0.00825129	0.00731133	0.00861406	0.00747472	0.00763407	0.00909525	0.010241	0.00848405	0.0104718	0.00863546	0.0147486	0.0115022	0.0136411	0.0102828	0.0101456	0.0215641	0.0169698	0.0167426	0.0170016	0.0195156
Acids	Glycolic acid	Glycolic acid (2TMS)	0.0166802	0.0179	0.0151688	0.0173498	0.0136769	0.0266686	0.0266791	0.0202978	0.0284681	0.0262547	0.0283953	0.0236449	0.0232501	0.0245199	0.0224514	0.0208858	0.0250498	0.0195105	0.0224301	0.0212985	0.0300001	0.0296091	0.0301765	0.0277386	0.0258212	0.0346657	0.0301182	0.0286099	0.0225171	0.0287261
Acids	Itaconic acid	Itaconic acid (2TMS)	0.0167069	0.0143177	0.0132577	0.0162879	0.0110245	NA	NA	NA	0.00603994	0.00286182	NA	NA	NA	NA	NA	NA	0.00414966	NA	NA	NA	NA	NA	NA	NA	NA	NA	0.0155319	0.020883	0.00980183	NA
Acids	Lactic acid	Lactic acid (2TMS)	0.0167069	0.0154006	0.0129788	0.0151201	0.0117593	0.0681813	0.0710747	0.0520506	0.0758584	0.0550735	0.124508	0.0687081	0.0424585	0.0800057	0.0742633	0.0708004	0.099454	0.0603184	0.108042	0.106011	0.106265	0.140654	0.172816	0.183422	0.189363	0.236962	0.101012	0.207175	0.208437	0.17952
Acids	Malic acid	Malic acid (3TMS)	0.0131593	0.0171925	0.013054	0.0184538	0.0126276	0.00994729	0.0105814	0.00900312	0.0119977	0.0112256	0.0158075	0.0120188	0.0119265	0.0144601	0.0106483	0.0146897	0.0163283	0.0157367	0.0126822	0.0140196	0.0123556	0.0135146	0.0130541	0.00951142	0.00717541	0.0184287	0.0131401	0.0113148	0.0139707	0.0137553
Acids	Malonic acid	Malonic acid (2TMS)	0.0167069	0.0141865	0.0126047	0.0134083	0.010396	0.0129697	0.0257771	0.0110719	0.015835	0.0133565	0.0113942	0.0143002	0.015935	0.00893292	0.0128357	0.0113338	0.00502626	0.00954462	0.00617351	0.00621722	0.0271164	0.0162738	0.0177992	0.0251174	0.0214421	0.00971136	0.0214242	0.0102392	0.0240688	0.0231688
Acids	Pyruvic acid	Pyruvic acid (2TMS)	0.0167069	0.0172255	0.0146757	0.0171743	0.0141216	0.00889715	0.0122776	0.00865291	0.0135622	0.0120505	0.0128439	0.0116569	0.0109963	0.0114695	0.0102259	0.00986258	0.0112636	0.00890903	0.0089433	0.00772179	0.0102809	0.00777274	0.00936787	0.00741007	0.00732946	0.0135124	0.00980192	0.00924256	0.00805963	0.0129926
Acids	Succinic acid	Succinic acid (2TMS)	0.0163904	0.0167839	0.0174174	0.0177455	0.0141868	0.0122048	0.0182515	0.0138901	0.0209368	0.0209684	0.0269929	0.0198679	0.0244591	0.0232021	0.0260116	0.022126	0.0233094	0.0250592	0.0238315	0.0170561	0.0117774	0.00957316	0.0101171	0.0249979	0.0205917	0.0495832	0.00975844	0.0310252	0.024279	0.0213412
Acids	Syringic acid	Syringic acid (2TMS)	0.0079227	0.00990403	0.0130419	0.017329	0.0166045	0.00492792	0.0105944	0.00945033	0.0152517	0.0146005	0.00559309	0.00729816	0.00948928	0.0161743	0.0138372	NA	NA	NA	0.00787901	0.00751128	NA	NA	NA	NA	NA	NA	NA	NA	NA	NA
Acids	Tartaric acid	Tartaric acid (4TMS)	0.0161818	0.0172429	0.0175479	0.0175872	0.0142899	NA	0.00548281	NA	0.00530024	0.00479823	0.0600248	0.00681289	NA	0.00569806	0.00657302	NA	0.00825365	NA	0.00660017	0.00928276	NA	NA	0.0199741	NA	NA	NA	NA	NA	0.0127314	NA
Acids	Vanillic acid	Vanillic acid (2TMS)	0.0162002	0.0164154	0.0161937	0.0181878	0.0148813	0.0140448	0.0174323	0.0117598	0.0163754	0.0122955	0.0139878	0.0123765	0.01259	0.011398	0.0127048	NA	NA	NA	NA	NA	NA	NA	NA	NA	NA	NA	NA	NA	NA	NA
Aromatic	Benzaldehyde, 2,5-dihydroxy-	Benzaldehyde, 2,5-dihydroxy- (1MEOX) (2TMS) MP	0.0167069	0.0153478	0.0141935	0.0164255	0.0138781	0.00363319	0.00377416	0.00393756	0.00505551	0.00444257	0.00379643	0.00313629	0.00352858	0.00301182	0.00411104	NA	0.00443446	NA	NA	NA	NA	NA	NA	NA	NA	NA	NA	NA	NA	NA
N- Compounds	Indole-3-acetonitrile	Indole-3-acetonitrile (1TMS)	0.0117409	0.0144684	0.0149471	0.0184538	0.0141887	0.0398632	0.0470996	0.0330269	0.0356077	0.0328213	0.0504793	0.0470561	0.0391249	0.0356159	0.0338119	0.0471053	0.0526545	0.0427844	0.0391773	0.0294574	0.0501719	0.041522	0.042496	0.038083	0.0327822	0.0490675	0.0412213	0.0413082	0.0423711	0.0389454
N- Compounds	Nicotinic acid	Nicotinic acid (1TMS)	0.0167069	0.014217	0.0161139	0.0171287	0.0131988	0.0118402	0.0140661	0.00941133	0.0133012	0.0116486	0.0135189	0.0113411	0.0124706	0.0129738	0.0109852	0.00874949	0.00927038	0.00768318	0.00745367	0.00702469	0.00758352	0.00703382	0.00730199	0.00633092	0.00655124	0.00706151	0.00712337	0.00750173	0.00697264	0.00775027
N- Compounds	Putrescine	Putrescine (4TMS)	0.0028913	0.00300158	0.00253918	0.00212189	0.00219268	NA	NA	NA	0.00607106	0.00501304	0.0201087	0.014884	0.0103275	0.0184378	0.0161769	0.0519739	0.0721171	0.0420006	0.0372999	0.0389264	0.180037	0.12311	0.175707	0.0986187	0.137209	0.274222	0.253705	0.243039	0.261048	0.320073
N- Compounds	Pyridine, 3-hydroxy-	Pyridine, 3-hydroxy- (1TMS)	0.00172274	0.00227755	0.00255908	0.00284409	0.00276483	0.00624808	0.00856291	0.00849542	0.0101339	0.0094422	0.00839599	0.00914785	0.0109756	0.0134308	0.0113363	0.00903596	0.0116038	0.012146	0.0131855	0.011923	0.0157914	0.0136866	0.0141254	0.016846	0.0140774	0.0201137	0.0169958	0.0175197	0.0166441	0.0178359
N- Compounds	Uracil	Uracil (2TMS)	0.00926443	0.00848579	0.00588798	0.00656623	0.00511555	NA	NA	NA	NA	NA	NA	NA	NA	0.0109881	0.0115925	NA	NA	NA	NA	NA	NA	NA	NA	NA	NA	NA	0.0207491	0.0231768	NA	NA
N- Compounds	Uric acid	Uric acid (4TMS)	0.00786377	0.00741722	0.00563495	0.00899603	0.00224219	NA	NA	NA	NA	NA	NA	NA	NA	NA	NA	NA	NA	NA	NA	NA	NA	NA	NA	NA	NA	NA	NA	NA	NA	NA
Phenylpropanoids	Sinapic acid, trans-	Sinapic acid, trans- (2TMS)	0.013286	0.0128791	0.0156619	0.0184538	0.0126101	0.0168552	0.0201482	0.0162514	0.0205701	0.0178651	0.0159628	0.0136751	0.0157742	0.0130342	0.0139124	0.0114182	0.0126798	0.0130996	0.00832568	0.0112882	0.00966358	0.00899114	0.0107389	0.00742391	0.0071509	0.0106331	0.00804805	0.00789742	0.00933852	0.0102458
Phosphates	Fructose-6-phosphate	Fructose-6-phosphate (1MEOX) (6TMS) MP	0.00445655	NA	NA	NA	0.0035846	0.053439	0.0597871	0.0554273	0.0684945	0.0585799	0.106121	0.110815	0.0928751	0.112866	0.11384	0.132087	0.185737	0.15414	0.152888	0.145859	0.168973	0.168576	0.160992	0.140825	0.131306	0.129312	0.213996	0.169506	0.165662	0.18607
Phosphates	Glucose-6-phosphate	Glucose-6-phosphate (1MEOX) (6TMS) MP	0.00436178	0.00501598	0.00732407	0.00957562	0.00888958	0.0525798	0.0608672	0.0554903	0.0720088	0.0679117	0.114467	0.11818	0.0900483	0.117741	0.107414	0.155477	0.177127	0.156824	0.15628	0.143385	0.187845	0.177383	0.17622	0.148338	0.122765	0.163853	0.198506	0.187037	0.183441	0.192293
Phosphates	Glyceric acid-3-phosphate	Glyceric acid-3-phosphate (4TMS)	0.00206503	0.00261234	0.00317627	0.00360672	0.00215757	0.0223925	0.036371	0.0337354	0.0452817	0.0442849	0.0598729	0.0620036	0.0538782	0.0666304	0.0622896	0.0668884	0.0880924	0.0856867	0.0901203	0.0921162	0.13803	0.127718	0.16621	0.135238	0.12987	0.160394	0.236243	0.179134	0.202942	0.25722
Phosphates	Glycerol-3-phosphate	Glycerol-3-phosphate (4TMS)	0.0167069	0.0122938	0.0126975	0.0122923	0.00917089	0.0221497	0.0263832	0.0230625	0.0302178	0.0225626	0.0371602	0.0268741	0.0250596	0.0280411	0.024967	0.0189834	0.024847	0.0252955	0.0275557	0.0273564	0.0246686	0.0258197	0.0345721	0.0277605	0.0295703	0.0375644	0.0403261	0.0398596	0.0440398	0.0628404
Phosphates	Mannose-6-phosphate	Mannose-6-phosphate (1MEOX) (6TMS) MP	0.0130843	0.0115782	0.012084	0.0121974	0.00974422	0.0570892	0.0554907	0.0504173	0.0629914	0.0614677	0.0953943	0.0982401	0.0843808	0.104303	0.0957197	0.136295	0.174931	0.130931	0.139691	0.13418	0.202097	0.183216	0.183466	0.148634	0.135999	0.165306	0.223475	0.185341	0.15888	0.179376
Phosphates	myo-Inositol-phosphate	myo-Inositol-1-phosphate (7TMS)	0.00681033	0.00627092	0.00698902	0.00927454	0.00601465	0.0329233	0.0279728	0.0341501	0.0340342	0.0331254	0.0498155	0.0452589	0.0352958	0.0389878	0.0499903	0.118222	0.105464	0.0834899	0.0753178	0.0933416	0.139062	0.132796	0.153814	0.148437	0.131597	0.135903	0.140347	0.176356	0.138984	0.144339
Phosphates	Phosphoric acid	Phosphoric acid (3TMS)	0.00594302	0.00879034	0.00671655	0.00768624	0.0061059	0.0116806	0.010184	0.00705298	0.0141454	0.0176462	0.032593	0.0272222	0.0207674	0.029112	0.0268326	0.0998887	0.0928672	0.0669761	0.0748164	0.0880439	0.209689	0.209744	0.209637	0.189101	0.185473	0.304126	0.280147	0.298245	0.267836	0.315755
Phosphates	Phosphoric acid monomethyl ester	Phosphoric acid monomethyl ester (2TMS)	0.00206293	0.00444488	0.00778443	0.00397767	0.00411225	0.0307497	0.0286253	0.0296826	0.0722576	0.0264087	0.053145	0.12214	0.0972324	0.0449911	0.0629047	0.134616	0.103206	0.18398	0.161534	0.159951	0.14492	0.161853	0.0891058	0.0941198	0.121772	0.0995446	0.220206	0.120713	0.184732	0.164359
Phosphates	Pyrophosphate	Pyrophosphate (4TMS)	NA	0.00813716	0.00968868	0.00513807	0.00402828	0.0386721	0.040079	0.046968	0.0540934	0.0428481	0.0940432	0.13932	0.0616402	0.072105	0.0687454	0.100717	0.144648	0.112189	0.1044	0.0730074	0.0943422	0.049809	0.0653813	0.0395436	NA	0.0491798	0.036236	NA	NA	NA
Polyhydroxy Acids	Erythronic acid	Erythronic acid (4TMS)	0.0130004	0.0176774	0.0122238	0.0184538	0.0147592	NA	NA	NA	NA	NA	NA	NA	NA	NA	NA	NA	NA	NA	NA	NA	NA	NA	NA	NA	NA	NA	NA	NA	NA	NA
Polyhydroxy Acids	Gluconic acid	Gluconic acid (6TMS)	0.0126689	0.0175756	0.0131349	0.0184538	0.0118494	0.00812819	0.0211145	0.00701045	0.00984375	0.00780013	0.0161797	0.018334	0.0106303	0.0147471	0.0119296	0.0285779	0.0344189	0.0184824	0.0111491	0.0322013	0.034983	0.0706303	0.0415313	0.0295144	0.0327414	0.0145511	0.0231927	0.016774	0.0140101	0.0266921
Polyhydroxy Acids	Gluconic acid-1,5-lactone	Gluconic acid-1,5-lactone (4TMS)	0.013287	0.0188827	0.0152687	0.018364	0.0150799	0.0371305	0.034272	0.0294084	0.0433433	0.039312	0.0395733	0.0372209	0.0375489	0.0425908	0.0382669	0.0336382	0.0352121	0.0361877	0.0314066	0.0407459	NA	NA	NA	NA	NA	NA	NA	NA	NA	NA
Polyhydroxy Acids	Glyceric acid	Glyceric acid (3TMS)	0.0164306	0.015922	0.0163326	0.0183858	0.0138093	0.0124999	0.0121744	0.0116147	0.0124819	0.012198	0.0154116	0.0144945	0.0182685	0.0146171	0.016093	0.0202099	0.0210396	0.0198013	0.0215152	0.0213973	0.0288886	0.0317947	0.0316108	0.0298874	0.0303206	0.0342108	0.0293789	0.0318959	0.0336388	0.0326335
Polyhydroxy Acids	Ribonic acid	Ribonic acid (5TMS)	0.0164004	0.0165287	0.0176276	0.0173851	0.0137989	0.0132273	0.0123942	0.0115975	0.0116369	0.0119952	0.0148307	0.0174999	0.0148056	0.0138921	0.0167889	0.0180736	0.0188414	0.0162322	0.0153154	0.0150906	0.0201086	0.0227934	0.0152549	0.0122199	0.0176112	0.0240632	0.019917	0.0205389	0.0217453	0.0226299
Polyhydroxy Acids	Threonic acid	Threonic acid (4TMS)	0.0166877	0.0157181	0.0152046	0.0167403	0.0136423	0.00146025	0.00361393	0.00268583	0.00295945	0.00223776	0.00647581	0.00522419	0.00451593	0.00497867	0.00488388	0.00924366	0.00915168	0.00856714	0.00915784	0.00768653	0.0134342	0.0111936	0.0159057	0.0127729	0.0118878	0.0188282	0.0162918	0.0149672	0.0141006	0.015631
Polyols	Arabitol	Arabitol (5TMS)	0.0167069	0.0122894	0.0155192	0.0159988	0.0113695	0.00371998	0.00400386	0.00295842	0.00363561	0.00378934	0.00484758	0.0075126	0.00335756	0.00532314	0.00374331	0.0170256	0.0148555	0.0100087	0.0105545	0.0111375	0.0238737	0.0188454	0.0300513	0.0157635	0.0231702	0.0378528	0.0304232	0.0758016	0.0373313	0.0706122
Polyols	Inositol, myo-	Inositol, myo- (6TMS)	0.013193	0.0189055	0.0159027	0.0183799	0.0130016	0.0711497	0.0760485	0.0617333	0.100617	0.0791475	0.0683368	0.0607004	0.0667576	0.0624223	0.0562551	0.0780183	0.0688957	0.0588556	0.0571145	0.0651533	0.0627199	0.0619239	0.0554085	0.0559752	0.0463239	0.0812416	0.0480225	0.0593073	0.0440037	0.0779939
Polyols	Mannitol	Mannitol (6TMS)	0.0129662	0.0162974	0.0137902	0.0184538	0.0129022	NA	NA	NA	NA	NA	NA	NA	NA	NA	NA	NA	NA	NA	NA	NA	NA	NA	NA	NA	NA	NA	NA	NA	NA	NA
Polyols	Sorbitol, 1,5-anhydro-	Sorbitol, 1,5-anhydro- (4TMS)	0.0167069	0.0174442	0.0156525	0.0173781	0.0143237	0.0200405	0.0237857	0.0154088	0.0221632	0.0192749	0.0317765	0.0227752	0.0199446	0.0216547	0.0213752	0.0334356	0.0329008	0.0269058	0.0260328	0.0272888	0.0383209	0.03875	0.042618	0.0439862	0.0989854	0.0704438	0.0481303	0.0514639	0.0520442	0.0440423
Polyols	Threitol	Threitol (4TMS)	0.0147983	0.0133633	0.0120551	0.0184538	0.0123742	NA	NA	NA	NA	NA	NA	0.000414396	NA	0.000409586	0.000487183	NA	NA	0.000633638	0.000480043	NA	0.00107908	NA	0.0010627	NA	NA	0.00154085	0.00107744	0.000838465	0.00131023	0.00150822
Sugar Conjugates	beta-D-Galactopyranoside, 1-isopropyl-, 1-thio-	beta-D-Galactopyranoside, 1-isopropyl-, 1-thio- (4TMS)	0.0166451	0.0175603	0.016125	0.0158289	0.014795	0.0678913	0.0632659	0.064406	0.0788737	0.070108	0.0674673	0.0480703	0.0711291	0.0495788	0.0559634	0.0496356	0.0400149	0.0413517	0.0378017	0.0332962	0.0481411	0.0323648	0.0403462	0.0248875	0.0236498	0.0456407	0.0330636	0.0330528	0.025387	0.0304766
Sugar Conjugates	Galactinol	Galactinol (9TMS)	0.0166814	0.0192254	0.0173131	0.0173084	0.0161142	0.00724016	0.00883907	0.00735363	0.00814846	0.00795555	0.00423336	0.00469882	0.00452612	0.00579791	0.00584947	0.00576326	0.00664619	0.00537211	0.00590965	0.00644845	0.00851333	0.00708938	0.00823349	0.00698342	0.00711157	0.00847439	0.00748356	0.00939407	0.00717485	0.00805785
Sugars	Arabinose	Arabinose (1MEOX) (4TMS) MP	0.0149977	0.0156559	0.0159045	0.0184538	0.0143118	0.0183363	0.0209178	0.0149043	0.0266663	0.0212345	0.0279872	0.0225908	0.0333929	0.0298086	0.042867	0.0585571	0.0562296	0.0561343	0.0552722	0.0517169	0.0539053	0.0420621	0.0498392	0.0418686	0.0345923	0.0517326	0.0505051	0.0400595	0.0447829	0.0543387
Sugars	Fructose	Fructose (1MEOX) (5TMS) MP	0.0144587	0.0141048	0.014573	0.0184277	0.0117009	0.00577767	0.0069005	0.00471588	0.00779325	0.00660661	0.0204798	0.0182086	0.0146411	0.0165158	0.0179582	0.170851	0.160633	0.132826	0.130965	0.136983	0.200771	0.162539	0.190455	0.160313	0.166954	0.295913	0.237655	0.194332	0.248652	0.238529
Sugars	Glucopyranose	Glucopyranose [-H20] (4TMS)	0.0166441	0.0150745	0.0142481	0.013026	0.00916453	0.00496513	0.00743008	0.00540103	0.00860087	0.00627506	0.0079769	0.00831473	0.00689263	0.00851017	0.00802546	0.00913434	0.0101618	0.00897815	0.00909209	0.00948786	0.0119552	0.0126697	0.0142666	0.0127861	0.0143584	0.0160744	0.0144822	0.0155705	0.0170466	0.0213778
Sugars	Glucose	Glucose (1MEOX) (5TMS) MP	0.0118158	0.016278	0.0131502	0.0184291	0.0121244	0.0123183	0.0159823	0.0124862	0.0187238	0.0158722	0.0330513	0.0348955	0.0262367	0.0289834	0.0260276	0.158149	0.122335	0.113945	0.113044	0.145512	0.209711	0.188063	0.161374	0.194328	0.151757	0.235539	0.229425	0.215184	0.225965	0.23926
Sugars	Glucose, 1,6-anhydro-, beta-	Glucose, 1,6-anhydro-, beta- (3TMS)	0.0163265	0.0171283	0.017869	0.0147038	0.0143563	NA	NA	NA	NA	NA	NA	NA	NA	NA	NA	NA	NA	NA	NA	NA	NA	NA	NA	NA	NA	NA	NA	NA	NA	NA
Sugars	Maltose	Maltose (1MEOX) (8TMS) MP	0.0115235	0.0137991	0.017652	0.0169711	0.0163476	0.0148641	0.0263519	0.0274906	0.0424078	0.0479337	0.0203892	0.0280658	0.0302172	0.052082	0.0464103	0.0120359	0.0181952	0.0227513	0.0249806	0.0312884	0.00865713	0.0103511	0.0146368	0.0118543	0.014945	0.00875637	0.0095148	0.0113462	0.0115151	0.0177118
Sugars	Raffinose	Raffinose (11TMS)	0.0149914	0.0173271	0.0173939	0.0175015	0.0166045	0.000643083	0.00121455	0.00107474	0.00111155	0.000868519	0.000365827	0.000358062	0.00038376	0.000314739	0.000404116	0.000364849	0.000286907	0.000314112	0.00024719	0.000216237	0.000293668	0.000344769	NA	NA	NA	0.000435645	0.000391527	0.000321483	0.000300451	0.000330125
Sugars	Rhamnose	Rhamnose (1MEOX) (4TMS) MP	0.0167069	0.0137908	0.0139213	0.0157841	0.0126286	0.0115569	0.010959	0.0108674	0.0113271	0.00915037	0.0151409	0.0166107	0.0146475	0.0132335	0.0179301	0.0251304	0.0288874	0.0221227	0.0260922	0.0274943	0.0436272	0.0438027	0.0502602	0.0435973	0.0478307	0.0483864	0.0474878	0.0498805	0.0492616	0.0541332
Sugars	Sucrose	Sucrose (8TMS)	0.0148227	0.0166958	0.0160667	0.0184538	0.0139709	0.00854193	0.0119124	0.00856207	0.0118654	0.0108812	0.00637286	0.00416008	0.00658309	0.00453611	0.00504402	0.00401389	0.00327006	0.00381613	0.00297474	0.00266701	0.00307326	0.0024079	0.0035999	0.00280612	0.00225213	0.00451911	0.00323003	0.00438816	0.00340769	0.0034964
Sugars	Xylose	Xylose (1MEOX) (4TMS) MP	0.00345053	0.00367845	0.0036016	0.00413446	0.00326653	0.019362	0.0205656	0.0153488	0.0305976	0.0215194	0.0545188	0.0477036	0.0517467	0.054346	0.0666298	0.177765	0.183564	0.168073	0.170644	0.151394	0.185508	0.155737	0.151742	0.139762	0.114778	0.159306	0.134023	0.144664	0.150476	0.145789
MSTs	A116014	Unknown#bth-pae-013	0.0135786	0.0179334	0.013954	0.0179165	0.0162798	NA	NA	NA	0.0178945	NA	0.0296695	0.0235935	NA	0.0182269	0.0243796	0.0288381	NA	0.0384192	0.0294968	NA	NA	NA	NA	NA	NA	NA	NA	NA	NA	0.0499641
MSTs	A124004	A124004-101	0.00413597	0.00626986	0.0108937	0.0138511	0.0166045	0.00318629	0.00742888	0.0120951	0.0256748	0.0285494	0.00484122	0.00822068	0.0145476	0.0297792	0.0246655	0.00264189	0.000796533	0.00851377	0.0126882	0.0149332	NA	NA	0.00122917	NA	0.00109734	0.000786226	NA	NA	NA	0.00292928
MSTs	A125004	A125004-101	0.00883505	0.0153285	0.00943463	0.0150645	0.0113171	0.0806393	0.106427	0.1185	0.10483	0.106976	0.122086	0.119484	0.0908781	0.113827	0.138615	0.124011	0.133288	0.123596	0.1372	0.161529	0.175125	0.162034	0.212883	0.137202	0.175633	0.205076	0.168236	0.185779	0.15985	0.224455
MSTs	A126018	NA126018	0.0119693	0.0133887	0.0136061	0.01631	0.0142601	0.0545332	0.061018	0.0538139	0.0616155	0.062521	0.062134	0.0658792	0.0704062	0.0741956	0.0703995	0.10779	0.118323	0.096592	0.111008	0.119163	0.213915	0.206197	0.232518	0.218263	0.211615	0.287003	0.258498	0.293141	0.270081	0.309148
MSTs	A128004	A128004-101	0.0167069	0.0112175	0.0105265	0.00754094	0.0104114	NA	NA	0.0155705	0.0190076	0.0113352	NA	NA	NA	0.0130892	0.0117522	NA	NA	NA	NA	0.0241914	NA	NA	NA	NA	NA	NA	NA	NA	NA	NA
MSTs	A131011	A131011-101	0.00190752	0.00410511	0.00933358	0.014016	0.0166045	NA	0.00248803	0.00589615	0.0186464	0.0232433	0.00260047	0.00753311	0.0105383	0.0208986	0.0156371	NA	0.00133369	0.00208393	0.00505324	0.00663322	NA	NA	NA	0.00236912	NA	NA	NA	NA	NA	0.00175055
MSTs	A142022	NA142022	0.0063173	0.00651223	0.00572526	0.00628475	0.00548956	0.0396072	0.0553598	0.0379365	0.0497212	0.0445392	0.0864424	0.0920147	0.0792374	0.079447	0.140816	0.106747	0.13322	0.141214	0.132722	0.105577	0.185997	0.136084	0.14661	0.132207	0.113927	0.172959	0.159482	0.211456	0.152708	0.163767
MSTs	A148003	A148003-101	0.00760962	0.0101444	0.0136562	0.0175265	0.0165417	NA	NA	NA	0.022898	0.0222911	NA	NA	NA	0.0247914	NA	NA	NA	NA	NA	NA	NA	NA	NA	NA	NA	NA	NA	NA	NA	NA
MSTs	A155014	D155405	0.0141428	0.0166752	0.0159415	0.0180978	0.0162864	0.0342571	0.0382373	0.0370181	0.0542545	0.052382	0.0240091	0.0239407	0.0305109	0.0353537	0.0385151	0.0294487	0.0522104	0.0475513	0.0564684	0.0455703	0.0562056	0.0629139	0.0624759	0.0656248	0.0746937	0.0412532	0.0475461	0.0571888	0.0587761	0.0637385
MSTs	A160018	Unknown#sst-cgl-037	0.00894356	0.0102274	0.0109056	0.0137568	0.00790516	0.0587197	0.0886809	0.054606	0.0789693	0.0644911	0.102005	0.0980218	0.102618	0.118925	0.0843849	0.102715	0.0728077	0.0878908	0.101615	0.092425	0.0644433	0.079866	0.062754	0.0971908	0.0796965	0.0829087	0.0691939	0.11039	0.0789734	0.0644643
MSTs	A161007	A161007-101	0.0116196	0.0137275	0.0158884	0.0183606	0.0159491	0.0260238	0.0215431	0.0192156	0.0296058	0.0263959	0.0293312	0.022085	0.0334468	0.0329835	0.0341447	0.0343121	0.0262734	0.0265232	0.0270102	0.0263716	0.0609158	NA	0.0451407	NA	NA	0.0702419	0.0547611	0.0501535	0.042969	0.0657633
MSTs	A162009	Unknown#sst-cgl-039	0.0166756	0.0140723	0.0168841	0.0159681	0.0134222	0.0170626	0.0191219	0.0122464	0.0160839	0.0148856	0.0285409	0.0265923	0.0202643	0.0199564	0.0159062	0.0380164	0.0299069	0.0154454	0.0293246	0.0524824	NA	0.118698	NA	0.0985264	0.088496	0.130692	0.0319929	0.0896324	NA	0.0597875
MSTs	A167004	A167004-101	0.0151784	0.015486	0.0150961	0.0162991	0.0131756	0.0200772	0.0221227	0.0173229	0.0271464	0.0151976	0.028088	0.0382426	0.0254337	0.0275352	0.0262725	0.106223	0.0990358	0.0628042	0.0750468	0.0703244	0.209699	0.126065	0.25852	0.0703106	0.166433	0.264041	0.206343	0.275629	0.22235	0.271221
MSTs	A167005	A167005-101	0.0167069	0.0140257	0.0134994	0.0138969	0.0117008	0.0175588	0.020058	0.0152236	0.0179991	0.0150348	0.0205727	0.0170901	0.0163024	0.0141933	0.0136013	0.0166149	0.0175341	0.0148785	0.0135554	0.0107553	0.0177787	0.0126486	0.0152358	0.0103045	0.00900502	0.0170953	0.0130112	0.0129266	0.0117339	0.0125533
MSTs	A171003	A171003-101	0.0119905	0.0120648	0.0112877	0.012083	0.00986245	NA	NA	NA	NA	NA	0.0232806	0.0500817	NA	0.0185119	0.0104916	0.131884	0.0999583	0.0830745	0.0838353	0.0963711	0.180168	0.153445	0.201811	0.0975016	0.162099	0.284358	0.246041	0.260257	0.226496	0.293753
MSTs	A174005	A174005-101	0.0117106	0.0094294	0.00812555	0.0102316	0.00589197	0.0562185	0.0584752	0.044817	0.063564	0.0526535	0.0999463	0.100749	0.0807003	0.0971229	0.0846447	0.149059	0.153997	0.12903	0.13853	0.13916	0.212391	0.182904	0.221434	0.185178	0.1687	0.318151	0.268928	0.247827	0.247494	0.269789
MSTs	A175008	A175008-101	0.00653988	0.00680211	0.00668345	0.00672364	0.00481561	0.049612	0.0591317	0.0484521	0.0626175	0.0506394	0.105974	0.104464	0.0853513	0.100807	0.0866125	0.158137	0.152032	0.139216	0.141106	0.140861	0.210298	0.195979	0.213842	0.18526	0.184691	0.325915	0.276584	0.24769	0.253827	0.271526
MSTs	A181001	NA181001	0.0159808	0.0162459	0.0159957	0.0182026	0.0142886	NA	NA	NA	0.0136901	0.0114332	0.00957012	0.00957536	0.01769	0.00948813	0.0100821	0.0471248	0.0414748	0.0388981	0.0274367	0.0285562	0.083646	0.0610145	0.0868174	0.0913117	0.0826686	0.130688	0.105183	0.0934401	0.093724	0.111744
MSTs	A183003	A183003-101	0.00990922	0.0120386	0.017869	0.0175163	0.0138477	0.0129669	0.0221618	0.0235655	0.0410715	0.0362391	0.0490159	0.0837059	0.0447407	0.0503907	0.0479777	0.068897	0.0798997	0.0687084	0.0631126	0.0671637	0.0634744	0.0473512	0.070539	0.0362465	0.0449046	0.0573568	0.0523286	0.0529522	0.045466	0.0615852
MSTs	A190021	A190021-101	0.0142886	0.0143377	0.0151797	0.0176195	0.0118889	0.108337	0.108896	0.11395	0.105772	0.11234	0.106536	0.115978	0.109148	0.107677	0.103909	0.112692	0.110787	0.109263	0.10722	0.101301	0.183431	0.190258	0.184702	0.167839	0.167425	0.181395	0.153351	0.165049	0.15536	0.178474
MSTs	A195013	A195013-101	NA	NA	NA	NA	NA	0.0133325	NA	0.0141196	0.0283705	0.0215781	0.0783005	0.0583567	0.0226136	0.0557929	0.0362791	0.10717	0.121158	0.0697495	0.0459072	0.141894	0.155292	0.347988	0.196286	0.171276	0.177974	0.083004	0.162193	0.0762542	0.0870234	0.191015
MSTs	A196006	A196006-101	0.0166978	0.0151986	0.0154027	0.017	0.0143491	0.022147	0.0272867	0.0220689	0.0266078	0.0230663	0.0246971	0.0238042	0.0264301	0.0244048	0.0245384	0.0200889	0.0235473	0.0218869	0.019326	0.0163759	0.0297851	0.0151761	0.0179421	0.0133375	0.010407	0.0155786	0.0180825	0.0132327	0.0136533	0.014413
MSTs	A199004	A199004-101	0.0159034	0.0162778	0.0147204	0.0184344	0.0121465	0.029293	0.0354442	0.0233567	0.0385869	0.031861	0.0345095	0.0272434	0.0303199	0.0282361	0.0271867	0.0279287	0.0247305	0.0254605	0.0213365	0.021284	0.0243887	0.0165665	0.0203186	0.0142761	0.0100969	0.0178622	0.012587	0.0152179	0.0135701	0.0145465
MSTs	A206002	A206002-101	0.0131007	0.0188401	0.0126374	0.0149149	0.012834	0.0849785	0.084717	0.0828762	0.120519	0.105579	0.130684	0.103595	0.0992904	0.093665	0.1136	0.164852	0.158754	0.117949	0.123554	0.128357	0.179465	0.139727	0.140508	0.129105	0.101558	0.18241	0.140951	0.163212	0.13383	0.156881
MSTs	A216004	A216004-101	0.0111939	0.0140213	0.0146967	0.0167696	0.0140109	0.120982	0.121212	0.0722991	0.0812476	0.0741152	0.127852	0.122532	0.0964856	0.0804048	0.0947755	0.138486	0.141039	0.105598	0.0837177	0.0638532	0.134179	0.115454	0.108911	0.0892545	0.0664576	0.0986646	0.110413	0.0868786	0.083398	0.0635997
MSTs	A225007	A225007-101	0.00718118	0.0141029	0.0175225	0.0180601	0.00957694	0.0220745	0.0401154	NA	NA	NA	NA	NA	NA	NA	NA	NA	0.0303458	NA	NA	NA	NA	NA	NA	NA	NA	NA	NA	NA	NA	NA
MSTs	A227008	NA227008	0.0165554	0.0161738	0.0174614	0.0166451	0.0127318	0.0157813	0.021184	0.0127584	0.0160981	0.012388	0.0111025	0.00932651	0.0102961	0.00741899	0.00937376	0.00680275	0.00774057	0.00768659	0.006809	NA	NA	NA	NA	NA	NA	NA	NA	NA	NA	NA
MSTs	A229001	NA229001	0.0166616	0.0154979	0.0159267	0.0153911	0.0130514	0.014212	0.0175927	0.0157656	0.0160468	0.0174581	0.0171908	0.0160026	0.0161062	0.0193667	0.0179651	0.016953	0.0244268	0.0170635	0.0163148	0.0186817	0.0241184	0.0126967	0.0142668	0.0110517	0.0117889	0.0141426	0.0222615	0.0125021	0.00918152	0.0138324
MSTs	A242001	A242001-101	0.00524241	0.00694256	0.00551051	0.00549177	0.00438997	0.0177856	0.0214491	0.0180267	0.0184175	0.0182234	0.0339016	0.0303013	0.0310305	0.036017	0.0680249	0.0503039	0.0580078	0.0411768	0.100735	0.0449148	0.0790097	0.0566288	0.0603608	0.0510261	0.0527464	0.0762205	0.0572916	0.309592	0.176961	0.0696239
MSTs	A250001	A250001-101	0.0144736	0.0194585	0.0143493	0.0142926	0.0138031	0.0464321	0.0781818	0.055244	0.0789218	0.0593296	0.0769226	0.0770151	0.0857256	0.0789431	0.0888629	0.0693048	0.0826884	0.0873869	0.0832971	0.0771011	0.135454	0.0722004	0.112419	0.0708522	0.0742262	0.106439	0.124022	0.126262	0.0955028	0.116916
MSTs	A254009	A254009-101	0.0153763	0.0157036	0.0175586	0.0174549	0.0159671	0.0131473	0.0194005	0.0202191	0.0323152	0.0373261	0.0171081	0.0212851	0.0228932	0.0374088	0.0344586	0.0125752	0.016552	0.017551	0.0192095	0.0230631	0.00875056	0.0105825	0.0162386	0.0231346	0.0218917	0.01121	0.012508	0.012595	0.0207348	0.0233939
MSTs	A255012	Unknown#sst-cgl-119	NA	NA	NA	NA	NA	0.0416991	0.0367045	0.0336283	0.0505974	0.0458558	0.114526	0.10916	0.0945636	0.118925	0.118024	0.0864513	0.0769005	0.0787957	0.0799457	0.0788082	0.0841688	0.0748011	0.0893902	0.118947	NA	0.0849055	0.0691123	0.0799298	0.0828886	0.10138
MSTs	A257016	D262250	0.0167069	0.0153176	0.0127242	0.014319	0.0110577	0.0112614	0.0131566	0.00908089	0.0136287	0.0120285	0.0126498	0.0108724	0.0110977	0.0124484	0.0125273	0.0129933	0.0106964	0.00939822	0.00931815	0.00657642	0.00886821	0.00754153	0.00889557	NA	0.00820283	0.0104239	0.00837247	0.00953996	0.00700687	0.00693666
MSTs	A278013	D278931	0.0140574	0.0167103	0.0169394	0.0179515	0.0163335	0.0449242	0.0501764	0.0523396	0.0570945	0.0629353	0.0550378	0.0637312	0.0597092	0.0682552	0.0687298	0.0675814	0.0747412	0.066807	0.0680082	0.0762142	0.104093	0.112246	0.112986	0.113824	0.111649	0.116998	0.0930124	0.109539	0.110774	0.111524
MSTs	A284004	A284004-101	0.0152886	0.01767	0.0155868	0.0183471	0.0139929	0.0295296	0.0300868	NA	NA	NA	0.0374284	0.0288087	0.0276098	0.0287663	0.0362368	NA	NA	0.0288263	0.0356127	NA	NA	NA	NA	NA	NA	NA	NA	0.0544996	NA	NA
MSTs	A296004	A296004-101	0.01657	0.0179821	0.0171628	0.0162002	0.0137003	0.0208713	0.031858	0.0257247	0.0314038	0.0192475	0.0334564	0.0288197	0.0318581	0.0218952	0.0221105	0.0422336	0.0342479	0.0410125	0.0261442	0.0188099	0.0589676	0.0415036	0.0407046	0.0313104	0.0212692	0.161598	0.0998061	0.0723882	0.0755508	0.0633493
MSTs	A304001	A304001-101	0.0144553	0.016099	0.014972	0.0184473	0.0133524	0.0342538	0.0468895	0.0319779	0.034672	0.0324582	0.0347784	0.0319047	0.0320599	0.0268306	0.024058	0.0268832	0.031603	0.0238598	0.0225927	0.0199559	0.0331842	0.0238223	0.0260831	0.0197517	0.0175037	0.0281719	0.0255736	0.0200376	0.0183054	0.0164689
MSTs	A308003	A308003-101	0.0139189	0.0151883	0.0155296	0.0173127	0.0165229	0.0171859	0.0335982	0.0393503	0.0467988	0.0488153	0.0218559	0.0316354	0.0324928	0.0464697	0.0419349	0.012078	0.0230276	0.0264322	0.0251342	0.0265462	0.0151046	0.011907	0.019043	0.0167265	0.0138444	0.0136298	0.0127954	0.0173285	0.0157176	0.0232524
MSTs	A313001	A313001-101	0.00810191	0.0109533	0.0129075	0.0173922	0.0165807	0.033614	0.0523154	0.0596595	0.0747774	0.090115	0.035701	0.0671506	0.0602351	0.0958245	0.0970425	0.0312326	0.0589863	0.066968	0.0596844	0.0673665	0.0299089	0.0448806	0.0682469	0.0537377	0.0476931	0.0398272	0.0403129	0.0461483	0.0558157	0.0764485
MSTs	A318006	A318006-101	0.00304603	0.00633038	0.00725198	0.00958049	0.00923191	0.0333236	0.0616082	0.0737699	0.100991	0.103574	0.0475119	0.0780347	0.0765552	0.118925	0.115655	0.0379356	0.0666361	0.0819052	0.0782668	0.0806402	0.0314521	0.0457921	0.0605189	0.0560404	0.0536506	0.0286245	0.0404289	0.0493011	0.0528847	0.0605178
MSTs	A323002	A323002-101	0.0162723	0.0185243	0.017869	0.0174258	0.0140844	0.0326628	0.0322614	0.0170281	0.0225009	0.0166664	0.0193249	0.0179178	0.0148489	0.0128797	0.0124842	0.0121518	0.0438348	0.0112895	0.00716687	0.00588791	0.00851118	0.00946456	0.00915673	0.00894632	0.00607052	0.0104545	0.00952687	0.00732928	0.0078766	0.00659408
MSTs	A324001	A324001-101	0.00105144	0.00158211	0.0022581	0.00203776	0.00217799	0.0215766	0.0434883	0.046822	0.0722959	0.0614136	0.0424386	0.0867516	0.0580154	0.112343	0.140816	0.0502164	0.111696	0.102397	0.108155	0.105896	0.0761863	0.0877592	0.124002	0.120903	0.105963	0.106375	0.129397	0.127049	0.161794	0.169896
MSTs	A381003	A381003-101	0.0160861	0.0193092	0.0177836	0.0183747	0.0159022	0.00376491	0.00475439	0.00411011	NA	0.0037577	NA	NA	NA	NA	NA	NA	NA	NA	NA	NA	NA	NA	NA	NA	NA	NA	NA	NA	NA	NA

## Sheet: Supplemental Table S2
Supplemental Table S2: Amino acid content normalized to dry weight (nmol/gDW) in dry seeds (DS), germinating seeds and seedlings at indicated time points after imbibition.
Name	Normalized amico acid contents (nmol/mgDW) of samples from different time points after imbibition (n = 4)
	DS_1	DS_2	DS_3	DS_4	24 h_1	24 h_2	24 h_3	24 h _4	36 h_1	36 h_2	36 h_3	36 h_4	48 h_1	48 h_2	48 h_3	48 h_4	60 h_1	60 h_2	60 h_3	60 h_4	72 h_1	72 h_2	72 h_3	72 h_4
asp	1.86604	1.89997	1.83302	3.22992	3.07177	3.31447	3.96396	4.26321	3.44573	3.29416	2.86683	2.50086	2.47312	3.04358	5.59548	4.18553	4.85222	4.0753	6.02833	2.87293	4.35273	5.55336	4.81771	6.99886
glu	3.23229	3.44863	3.42906	4.95439	6.33186	8.04369	10.1363	10.3119	11.0416	10.9401	8.73343	8.07215	12.1129	14.0499	23.8043	18.4672	22.4053	18.7493	28.2848	13.2037	20.9905	26.2304	22.4762	34.2141
asn	1.99778	2.01639	2.21235	3.2022	1.2119	1.21408	1.68661	1.61857	2.48554	2.2908	1.53709	1.17758	3.64435	3.56625	4.94737	3.7661	6.90932	6.29399	10.2408	3.77582	7.9384	11.1402	8.92231	11.6918
ser	0.620093	0.701318	0.748123	1.48116	2.50095	2.53675	3.45981	3.97274	2.35562	2.22531	1.95744	1.97357	2.2077	2.30552	4.63419	3.47765	3.65245	2.94467	5.13701	3.16518	6.10715	11.5954	7.20389	12.1671
gln	0.673346	0.672518	0.683395	1.0553	11.2896	12.7887	15.8581	17.6063	38.127	35.6559	26.099	24.982	66.3297	63.2766	98.3294	72.7151	138.812	119.35	191.923	82.9115	149.421	167.1	134.415	201.024
gly	0.41533	0.477066	0.461013	0.963833	1.49529	1.63043	2.35086	2.52675	3.02958	3.30826	2.77313	3.97386	5.45667	4.62104	13.2867	11.0908	8.91013	7.77464	18.0433	12.8745	19.0737	11.8296	11.4663	35.4073
hsn	0.105385	0.098428	0.120599	0.11883	0.348365	0.438114	0.732819	0.591042	0.895989	0.750629	0.778452	0.399666	1.33815	2.03237	1.88055	2.37441	2.20614	2.53295	3.12242	2.84642	4.73554	2.11786	2.2468	3.41273
thr	0.286321	0.279857	0.277732	0.37342	0.807883	0.981597	1.22407	1.33515	1.78732	1.73992	1.33972	0.853371	1.96925	2.09809	3.23313	2.29681	1.99074	2.73542	4.12618	1.76709	2.74785	3.45422	3.05739	3.95552
his	0.104423	0.0960712	0.0975557	0.170211	0.695414	0.653159	0.809272	0.868224	1.69074	1.55516	1.15824	1.00531	1.67061	1.71091	2.69884	1.93835	2.34862	1.91885	2.94373	1.22078	2.00386	2.14983	1.82317	2.29289
ala	1.77475	1.78794	2.01902	2.98659	1.90182	1.96968	2.47265	3.57594	2.56963	2.41395	2.05267	1.63676	1.72347	2.00184	3.12644	2.62334	2.55262	1.90091	2.79082	1.28046	2.24648	1.46649	1.74412	2.28523
gABA	0.396654	0.411847	0.408123	0.593445	0.0236128	0.0227392	0.0213273	0.0182625	0.257365	0.205534	0.118071	0.065976	0.471119	0.48557	0.599198	0.478852	0.731154	0.518343	0.783398	0.281518	0.508606	0.719121	0.577866	0.589182
arg	0.450036	0.466422	0.564331	0.81811	2.24616	2.17631	2.75179	3.28907	3.72153	3.6976	2.95607	2.76576	3.5391	3.52651	4.82537	3.93333	5.16433	4.95509	8.57346	3.67242	6.86653	12.1646	10.0069	14.4544
tyr	0.0961642	0.0857201	0.101076	0.1356	0.301686	0.280391	0.357435	0.552813	0.53915	0.520905	0.409081	0.350166	0.209259	0.239944	0.38282	0.335494	0.24686	0.188912	0.233663	0.120141	0.187907	0.205867	0.198089	0.262427
val	0.330537	0.231649	0.240197	0.552295	0.388264	0.380108	0.435119	0.686508	0.686683	0.593692	0.475135	0.418278	0.657472	0.668177	1.27627	0.731034	1.09005	0.789695	1.24732	0.42305	0.80981	1.03326	0.862382	1.18691
met	0.0311592	0.0404098	0.0435855	0.0634535	0.84707	0.902952	0.942042	1.16361	0.947638	1.08818	0.963164	0.312105	1.07344	1.33299	1.57625	1.25907	1.5485	1.64266	1.44442	0.0334317	0.95792	1.51409	1.43676	1.42972
trp	0.229883	0.194147	0.163338	0.282145	0.768881	0.804849	1.13594	0.957359	1.0574	1.0145	0.806493	0.670616	0.444798	0.491175	0.81221	0.535892	0.265118	0.212803	0.310925	0.0956174	0.165855	0.152779	0.118252	0.149503
phe	0.491627	0.469326	0.518445	0.844354	0.891596	0.846346	1.19346	1.34575	1.27254	1.24905	1.05131	0.87877	0.649919	0.669947	1.14677	0.725625	0.848558	0.526187	0.958538	0.195271	0.45317	0.707312	0.606741	0.692559
ile	0.174353	0.177125	0.212739	0.248968	0.473943	0.379629	0.594634	0.593311	0.836092	0.770751	0.679627	0.519592	0.718695	0.71472	1.10998	0.716018	1.15045	0.901785	1.49152	0.590653	0.778264	1.26667	1.14285	1.18129
leu	0.174246	0.173322	0.192445	0.293027	0.449219	0.426158	0.56099	0.0626329	0.894556	0.832926	0.695874	0.59704	0.856894	0.896624	1.31949	0.962353	1.39882	1.13454	1.71704	0.698052	1.30051	1.7553	1.43566	1.91259
lys	0.164018	0.14526	0.158645	0.223086	0.409165	0.336753	0.397776	0.496291	1.03555	1.02213	0.740552	0.685883	0.977519	1.05322	1.33151	0.925504	1.49237	1.31071	1.86128	0.928577	1.52078	2.45125	1.90433	2.53173

## Sheet: Supplemental Table S3
Supplemental Table S3: LFQ intensities, annotation and disorder content of heat-stable proteins in dry seeds (DS), germinating seeds and seedlings at indicated time points after imbibition. Contaminants, proteins with unique peptides of 1 and proteins with 2 or more than missing values in all time points were excluded. Main protein IDs show the AGI codes of the main accession. Raw data were proce…
Main protein IDs	Majority protein IDs	Fasta headers	Peptides	Unique peptides	Sequence coverage [%]	Unique sequence coverage [%]	Mol. weight [kDa]	Q-value	Score	MS/MS count	LFQ intensities of heat-stable proteins of samples different time point after imbibition (n = 3)																		UniprotKB.ID	Length (residues)	Disorder content (%)
											DS_1	DS_2	DS_3	24 h_1	24 h_2	24 h_3	36 h_1	36 h_2	36 h_3	48 h_1	48 h_2	48 h_3	60 h_1	60 h_2	60 h_3	72 h_1	72 h_2	72 h_3
AT1G01320	AT1G01320.2;AT1G01320.1	AT1G01320.2 | Symbols: | Tetratricopeptide repeat (TPR)-like superfamily protein | chr1:121582-130099 REVERSE LENGTH=1787;AT1G01320.1 | Symbols: | Tetratricopeptide repeat (TPR)-like superfamily protein | chr1:121582-130099 REVERSE LENGTH=1797	9	9	6.5	6.5	197.5	0	43.658	72	NA	NA	NA	39805000	38761000	80660000	90459000	90876000	117840000	142990000	120700000	181190000	159510000	139410000	164440000	189480000	162620000	162520000	NA	NA	NA
AT1G02700	AT1G02700.1	AT1G02700.1 | Symbols: | unknown protein; FUNCTIONS IN: molecular_function unknown; INVOLVED IN: biological_process unknown; LOCATED IN: mitochondrion; BEST Arabidopsis thaliana protein match is: unknown protein (TAIR:AT4G02140.1); Has 49 Blast hits to 49	6	6	34.8	34.8	27.455	0	77.2	101	639800000	597220000	567190000	375480000	223180000	379760000	101040000	122480000	123670000	119400000	141490000	85042000	96552000	208040000	200170000	NA	108230000	137610000	NA	NA	NA
AT1G02780	AT1G02780.1	AT1G02780.1 | Symbols: emb2386 | Ribosomal protein L19e family protein | chr1:608120-609391 REVERSE LENGTH=214	3	2	16.8	12.6	24.606	0	40.376	54	NA	NA	NA	120150000	69855000	NA	142520000	132600000	188830000	76656000	67515000	377110000	143680000	94588000	114750000	111070000	59041000	100520000	Q9SRX2	214	100
AT1G03120	AT1G03120.1	AT1G03120.1 | Symbols: ATRAB28, RAB28 | responsive to abscisic acid 28 | chr1:752271-753140 FORWARD LENGTH=182	6	6	52.2	52.2	18.941	0	157.53	66	636930000	651830000	656020000	188700000	150820000	201810000	53003000	69899000	74598000	NA	NA	NA	NA	NA	NA	NA	NA	NA	Q9SA57	182	100
AT1G03350	AT1G03350.1	AT1G03350.1 | Symbols: | BSD domain-containing protein | chr1:822834-824246 REVERSE LENGTH=470	9	9	21.5	21.5	51.895	0	91.665	47	NA	NA	NA	NA	NA	NA	70558000	109830000	112210000	100960000	105100000	93256000	70819000	108610000	86135000	NA	83203000	NA	NA	NA	NA
AT1G03475	AT1G03475.1	AT1G03475.1 | Symbols: LIN2, HEMF1, ATCPO-I | Coproporphyrinogen III oxidase | chr1:869302-871175 REVERSE LENGTH=386	4	4	15.3	15.3	43.796	0	42.581	8	NA	NA	NA	NA	NA	NA	NA	NA	NA	NA	NA	NA	41862000	NA	NA	29139000	NA	32403000	Q9LR75	386	21
AT1G03600	AT1G03600.1	AT1G03600.1 | Symbols: PSB27 | photosystem II family protein | chr1:898916-899440 FORWARD LENGTH=174	4	4	31.6	31.6	18.834	0	8.4956	33	NA	NA	NA	NA	NA	NA	NA	NA	NA	NA	NA	NA	95738000	NA	76629000	170250000	145420000	165950000	Q9LR64	174	30.5
AT1G03680	AT1G03680.1	AT1G03680.1 | Symbols: ATHM1, TRX-M1, ATM1, THM1 | thioredoxin M-type 1 | chr1:916990-917865 REVERSE LENGTH=179	8	7	44.7	37.4	19.664	0	77.802	251	230510000	201200000	213870000	472870000	372900000	816480000	467080000	548490000	390790000	932310000	1058500000	1340300000	1302100000	1232200000	1140400000	1847300000	1529700000	1640000000	O48737	179	34.6
AT1G03870	AT1G03870.1	AT1G03870.1 | Symbols: FLA9 | FASCICLIN-like arabinoogalactan 9 | chr1:982625-983368 REVERSE LENGTH=247	3	2	14.6	10.9	26.115	0	119.08	133	NA	NA	NA	NA	NA	NA	NA	NA	NA	193720000	196160000	222640000	212750000	NA	NA	332310000	211370000	208200000	Q9ZWA8	247	26.3
AT1G03880	AT1G03880.1	AT1G03880.1 | Symbols: CRU2, CRB | cruciferin 2 | chr1:985786-987916 FORWARD LENGTH=455	22	20	66.8	64.8	50.558	0	323.31	2026	82700000000	112000000000	48000000000	40100000000	33200000000	18600000000	22700000000	23600000000	20300000000	13300000000	15700000000	13100000000	4401900000	5237500000	4413800000	1925100000	2052400000	1982600000	P15456	455	27
AT1G03890	AT1G03890.1	AT1G03890.1 | Symbols: | RmlC-like cupins superfamily protein | chr1:989250-990908 FORWARD LENGTH=451	18	18	55.7	55.7	49.674	0	323.31	458	3456200000	4654400000	2450200000	1525300000	2826100000	722600000	1888900000	1635200000	1532100000	1689400000	1961800000	805090000	640190000	802030000	702630000	224460000	328950000	327570000	Q9ZWA9	451	11.5
AT1G04410	AT1G04410.1	AT1G04410.1 | Symbols: | Lactate/malate dehydrogenase family protein | chr1:1189418-1191267 REVERSE LENGTH=332	7	7	25.9	25.9	35.571	0	19.977	133	NA	NA	244380000	112370000	211150000	134350000	296890000	285480000	232090000	273920000	309850000	177720000	466400000	237490000	261620000	263780000	217330000	300280000	P93819	332	0
AT1G05010	AT1G05010.1	AT1G05010.1 | Symbols: EFE, ACO4, EAT1 | ethylene-forming enzyme | chr1:1431419-1432695 REVERSE LENGTH=323	3	2	10.8	8.4	36.676	0	5.6367	12	NA	NA	NA	NA	NA	NA	NA	NA	NA	NA	NA	NA	NA	31995000	NA	32496000	43639000	37352000	Q06588	323	2.5
AT1G05385	AT1G05385.1	AT1G05385.1 | Symbols: LPA19, Psb27-H1 | photosystem II 11 kDa protein-related | chr1:1582747-1583648 REVERSE LENGTH=199	2	2	12.1	12.1	22.267	0	4.3405	7	NA	NA	NA	NA	NA	NA	NA	NA	NA	NA	NA	NA	NA	NA	NA	33318000	30866000	31814000	Q9ZVZ9	199	18.6
AT1G05510	AT1G05510.1	AT1G05510.1 | Symbols: | Protein of unknown function (DUF1264) | chr1:1629527-1630690 FORWARD LENGTH=241	8	8	31.5	31.5	27.293	0	85.848	137	854720000	675790000	909840000	479490000	354960000	629190000	286980000	310500000	342930000	164220000	254970000	284270000	256080000	185710000	157660000	168440000	146180000	233280000	Q9ZVY7	241	21.6
AT1G06190	AT1G06190.2;AT1G06190.1	AT1G06190.2 | Symbols: | Rho termination factor | chr1:1892589-1894078 REVERSE LENGTH=292;AT1G06190.1 | Symbols: | Rho termination factor | chr1:1892467-1894078 REVERSE LENGTH=401	6	6	21.6	21.6	32.596	0	16.7	51	NA	NA	NA	NA	NA	NA	85908000	71927000	82073000	111330000	104720000	104450000	121320000	121750000	147040000	105010000	112900000	110030000	Q94K75	401	100
AT1G06210	AT1G06210.1;AT1G06210.2	AT1G06210.1 | Symbols: | ENTH/VHS/GAT family protein | chr1:1897567-1898986 FORWARD LENGTH=383;AT1G06210.2 | Symbols: | ENTH/VHS/GAT family protein | chr1:1897567-1898494 FORWARD LENGTH=279	4	4	13.8	13.8	42.797	0	105.95	37	NA	NA	NA	NA	100470000	62420000	84802000	96007000	90412000	91203000	81019000	39519000	63782000	68705000	NA	NA	NA	NA	Q9LNC6	383	50.7
AT1G06680	AT1G06680.2;AT1G06680.1	AT1G06680.2 | Symbols: PSBP-1, OEE2, PSII-P | photosystem II subunit P-1 | chr1:2048076-2049186 FORWARD LENGTH=219;AT1G06680.1 | Symbols: PSBP-1, OEE2, PSII-P, OE23 | photosystem II subunit P-1 | chr1:2047940-2049186 FORWARD LENGTH=263	7	7	34.7	34.7	23.759	0	130.16	319	NA	NA	NA	NA	50846000	138030000	235290000	388630000	238790000	1587700000	1623800000	1030100000	2657500000	2340300000	2220700000	3800700000	4018400000	2864400000	Q42029	263	20.5
AT1G07140	AT1G07140.1	AT1G07140.1 | Symbols: SIRANBP | Pleckstrin homology (PH) domain superfamily protein | chr1:2192360-2193688 REVERSE LENGTH=228	14	8	55.7	32.5	25.601	0	272.66	322	801520000	562800000	740060000	2190000000	1703200000	2102500000	1985300000	1946200000	2258100000	1780500000	1677300000	1946800000	1341600000	1559700000	1850100000	1775900000	1663300000	1673500000	Q9LMK7	228	49.1
AT1G07320	AT1G07320.4;AT1G07320.3;AT1G07320.2;AT1G07320.1	AT1G07320.4 | Symbols: RPL4 | ribosomal protein L4 | chr1:2249190-2250173 FORWARD LENGTH=278;AT1G07320.3 | Symbols: RPL4 | ribosomal protein L4 | chr1:2249190-2250026 FORWARD LENGTH=278;AT1G07320.2 | Symbols: RPL4 | ribosomal protein L4 | chr1:2249190-2250	6	6	24.5	24.5	30.142	0	16.735	75	NA	NA	NA	NA	NA	NA	NA	NA	NA	78649000	112390000	77751000	159510000	138810000	127510000	154470000	126090000	162990000	O50061	282	31.2
AT1G07400	AT1G07400.1	AT1G07400.1 | Symbols: | HSP20-like chaperones superfamily protein | chr1:2275148-2275621 FORWARD LENGTH=157	4	2	28.7	15.3	17.828	0	3.7873	9	NA	NA	NA	49610000	NA	73369000	NA	NA	NA	NA	NA	NA	NA	NA	NA	NA	NA	NA	Q9LNW0	157	57.3
AT1G07645	AT1G07645.1	AT1G07645.1 | Symbols: ATDSI-1VOC, DSI-1VOC | dessication-induced 1VOC superfamily protein | chr1:2367612-2368349 REVERSE LENGTH=137	7	7	56.2	56.2	15.388	0	115.04	112	NA	NA	261100000	201620000	274880000	169790000	273000000	284960000	294360000	121770000	254060000	106340000	147950000	211200000	188190000	139380000	138730000	136850000	NA	NA	NA
AT1G07890	AT1G07890.6;AT1G07890.8;AT1G07890.7;AT1G07890.5;AT1G07890.4;AT1G07890.3;AT1G07890.2;AT1G07890.1	AT1G07890.6 | Symbols: APX1, MEE6, CS1, ATAPX1, ATAPX01 | ascorbate peroxidase 1 | chr1:2438005-2439349 FORWARD LENGTH=249;AT1G07890.8 | Symbols: APX1, MEE6, CS1, ATAPX1, ATAPX01 | ascorbate peroxidase 1 | chr1:2438005-2439435 FORWARD LENGTH=250;AT1G07890.	9	8	38.2	32.9	27.52	0	134.28	211	NA	NA	NA	128120000	111520000	271780000	306340000	350170000	195440000	450870000	531240000	468800000	516340000	532950000	385470000	384190000	553210000	390370000	Q05431	250	6.4
AT1G07985	AT1G07985.1	AT1G07985.1 | Symbols: | Expressed protein | chr1:2475508-2475942 FORWARD LENGTH=144	5	5	34	34	16.461	0	73.958	25	148600000	116790000	139610000	93696000	NA	NA	NA	NA	NA	NA	NA	NA	NA	NA	NA	NA	NA	NA	NA	NA	NA
AT1G08110	AT1G08110.3;AT1G08110.2;AT1G08110.1;AT1G08110.4	AT1G08110.3 | Symbols: | lactoylglutathione lyase family protein / glyoxalase I family protein | chr1:2535702-2537630 FORWARD LENGTH=185;AT1G08110.2 | Symbols: | lactoylglutathione lyase family protein / glyoxalase I family protein | chr1:2535702-2537630	3	3	20	20	20.848	0	3.3401	6	NA	NA	NA	NA	NA	NA	NA	NA	NA	18358000	22416000	NA	NA	NA	NA	NA	NA	NA	Q8H0V3	185	20
AT1G08370	AT1G08370.1	AT1G08370.1 | Symbols: DCP1, ATDCP1 | decapping 1 | chr1:2638355-2640367 FORWARD LENGTH=367	2	2	12.3	12.3	40.61	0	38.065	36	NA	NA	NA	89069000	66307000	NA	NA	54453000	NA	38059000	50457000	NA	NA	NA	NA	NA	NA	NA	Q9SJF3	367	72.2
AT1G08500	AT1G08500.1	AT1G08500.1 | Symbols: ENODL18, AtENODL18 | early nodulin-like protein 18 | chr1:2689110-2689881 FORWARD LENGTH=228	2	2	11.4	11.4	24.904	0	5.4938	13	NA	NA	NA	NA	NA	NA	23539000	NA	23677000	NA	NA	28494000	NA	NA	NA	NA	NA	NA	NA	NA	NA
AT1G08680	AT1G08680.3;AT1G08680.2;AT1G08680.1;AT1G08680.4	AT1G08680.3 | Symbols: ZIGA4 | ARF GAP-like zinc finger-containing protein ZIGA4 | chr1:2762820-2768387 FORWARD LENGTH=607;AT1G08680.2 | Symbols: ZIGA4 | ARF GAP-like zinc finger-containing protein ZIGA4 | chr1:2762820-2768387 FORWARD LENGTH=648;AT1G08680.	3	3	9.6	9.6	66.776	0	23.195	19	NA	NA	NA	NA	NA	NA	NA	NA	NA	NA	NA	36765000	22899000	NA	NA	46947000	41053000	NA	Q8RXE7	649	100
AT1G08780	AT1G08780.1	AT1G08780.1 | Symbols: AIP3, PFD4 | ABI3-interacting protein 3 | chr1:2809925-2811126 REVERSE LENGTH=129	3	3	20.9	20.9	14.88	0	7.3035	72	NA	NA	NA	143410000	114490000	156090000	91714000	108790000	107000000	111810000	109550000	136260000	67533000	130860000	96497000	72856000	95216000	83310000	Q9M4B5	129	74.4
AT1G08830	AT1G08830.2;AT1G08830.1	AT1G08830.2 | Symbols: CSD1 | copper/zinc superoxide dismutase 1 | chr1:2827700-2829053 FORWARD LENGTH=152;AT1G08830.1 | Symbols: CSD1 | copper/zinc superoxide dismutase 1 | chr1:2827700-2829053 FORWARD LENGTH=152	5	4	55.3	46.7	15.098	0	323.31	641	920240000	926160000	851390000	2672700000	1858700000	2041400000	3189100000	3429200000	3599200000	3002200000	3754500000	4615500000	2864500000	2907200000	2572400000	3606300000	3600000000	3259700000	P24704	152	11.2
AT1G09130	AT1G09130.2;AT1G09130.1;AT1G09130.3	AT1G09130.2 | Symbols: | ATP-dependent caseinolytic (Clp) protease/crotonase family protein | chr1:2940063-2942217 REVERSE LENGTH=330;AT1G09130.1 | Symbols: | ATP-dependent caseinolytic (Clp) protease/crotonase family protein | chr1:2940063-2942217 REVER	2	2	6.7	6.7	36.307	0	3.4199	8	NA	NA	NA	NA	NA	NA	NA	NA	NA	NA	NA	NA	NA	NA	NA	33603000	26449000	NA	Q8L770	330	19.4
AT1G09210	AT1G09210.1	AT1G09210.1 | Symbols: CRT1b, AtCRT1b | calreticulin 1b | chr1:2973217-2976655 REVERSE LENGTH=424	20	11	43.9	29	48.156	0	40.785	97	NA	NA	NA	86684000	211470000	72026000	331190000	307970000	278220000	520380000	436540000	73685000	298290000	326500000	254720000	64284000	100820000	149120000	Q38858	424	43.9
AT1G09310	AT1G09310.1	AT1G09310.1 | Symbols: | Protein of unknown function, DUF538 | chr1:3009109-3009648 FORWARD LENGTH=179	4	3	24	19	19.947	0	10.642	36	NA	NA	NA	NA	NA	NA	NA	NA	NA	49017000	NA	55469000	114830000	75458000	74055000	66035000	49878000	73724000	NA	NA	NA
AT1G09780	AT1G09780.1	AT1G09780.1 | Symbols: | Phosphoglycerate mutase, 2,3-bisphosphoglycerate-independent | chr1:3165550-3167812 REVERSE LENGTH=557	6	5	12.2	8.6	60.579	0	7.5201	18	NA	NA	NA	NA	NA	NA	NA	47315000	NA	34400000	NA	NA	NA	45125000	NA	54455000	54371000	53068000	O04499	557	4.8
AT1G10960	AT1G10960.1	AT1G10960.1 | Symbols: ATFD1, FD1 | ferredoxin 1 | chr1:3664445-3664891 FORWARD LENGTH=148	2	2	24.3	24.3	15.897	0	154.68	150	NA	NA	NA	100380000	146940000	64547000	180790000	101580000	110570000	234650000	277250000	129410000	270300000	261980000	140060000	226180000	246990000	218710000	O04090	148	31.8
AT1G11360	AT1G11360.4;AT1G11360.3;AT1G11360.2;AT1G11360.1	AT1G11360.4 | Symbols: | Adenine nucleotide alpha hydrolases-like superfamily protein | chr1:3822171-3822899 REVERSE LENGTH=242;AT1G11360.3 | Symbols: | Adenine nucleotide alpha hydrolases-like superfamily protein | chr1:3822171-3822899 REVERSE LENGTH=24	10	10	39.7	39.7	26.508	0	49.805	113	136810000	147280000	160250000	239450000	395020000	208500000	215490000	231460000	265770000	229450000	233500000	131370000	181390000	185590000	188460000	193520000	197400000	219480000	NA	NA	NA
AT1G11910	AT1G11910.1	AT1G11910.1 | Symbols: APA1, ATAPA1 | aspartic proteinase A1 | chr1:4017119-4019874 REVERSE LENGTH=506	7	5	22.3	17.4	54.613	0	83.182	161	557270000	331720000	456070000	886720000	1174600000	549060000	764460000	760670000	588520000	433870000	611310000	460730000	484200000	516040000	NA	211370000	299410000	275770000	O65390	506	0
AT1G11930	AT1G11930.2;AT1G11930.1	AT1G11930.2 | Symbols: | Predicted pyridoxal phosphate-dependent enzyme, YBL036C type | chr1:4028783-4030298 FORWARD LENGTH=255;AT1G11930.1 | Symbols: | Predicted pyridoxal phosphate-dependent enzyme, YBL036C type | chr1:4028783-4030298 FORWARD LENGTH=25	3	3	13.7	13.7	27.766	0	28.981	25	NA	NA	NA	NA	NA	NA	37778000	NA	25756000	35291000	26678000	NA	28179000	35093000	NA	37117000	38115000	29058000	NA	NA	NA
AT1G12080	AT1G12080.2;AT1G12080.1	AT1G12080.2 | Symbols: | Vacuolar calcium-binding protein-related | chr1:4084289-4084888 FORWARD LENGTH=138;AT1G12080.1 | Symbols: | Vacuolar calcium-binding protein-related | chr1:4084289-4084888 FORWARD LENGTH=104	12	11	87	76.8	15.382	0	323.31	607	NA	NA	NA	54506000	57304000	329020000	871560000	862560000	1022700000	2779200000	2586500000	2960100000	3233500000	4702900000	5488100000	4527700000	4404400000	4862400000	NA	NA	NA
AT1G12250	AT1G12250.2;AT1G12250.1	AT1G12250.2 | Symbols: | Pentapeptide repeat-containing protein | chr1:4159623-4161269 FORWARD LENGTH=206;AT1G12250.1 | Symbols: | Pentapeptide repeat-containing protein | chr1:4159287-4161269 FORWARD LENGTH=280	4	4	31.6	31.6	21.768	0	20.571	35	NA	NA	NA	NA	NA	NA	NA	NA	NA	NA	NA	39280000	65113000	47893000	52856000	101810000	92781000	80989000	Q8H1Q1	280	0
AT1G12270	AT1G12270.1	AT1G12270.1 | Symbols: Hop1 | stress-inducible protein, putative | chr1:4172105-4174575 FORWARD LENGTH=572	10	5	15.2	10	64.584	0	31.792	22	NA	NA	NA	38012000	36594000	53719000	NA	40055000	34782000	31248000	38415000	42360000	NA	NA	NA	35767000	43327000	38020000	Q9LNB6	572	34.4
AT1G12310	AT1G12310.1	AT1G12310.1 | Symbols: | Calcium-binding EF-hand family protein | chr1:4187500-4187946 REVERSE LENGTH=148	8	3	52.7	26.4	16.517	0	255.84	332	336940000	303260000	340080000	821290000	816670000	1010500000	1239900000	1438800000	1328800000	1573400000	1500000000	1976400000	1650000000	1740500000	1662300000	1647800000	1852700000	1480000000	Q94AZ4	148	9.5
AT1G12520	AT1G12520.2;AT1G12520.1;AT1G12520.3	AT1G12520.2 | Symbols: ATCCS, CCS | copper chaperone for SOD1 | chr1:4267277-4268438 REVERSE LENGTH=229;AT1G12520.1 | Symbols: ATCCS, CCS | copper chaperone for SOD1 | chr1:4267277-4268900 REVERSE LENGTH=320;AT1G12520.3 | Symbols: ATCCS, CCS | copper chape	4	4	22.7	22.7	24.318	0	10.007	21	NA	NA	NA	NA	NA	NA	NA	NA	NA	NA	NA	NA	38964000	46862000	40093000	NA	34607000	47548000	Q9LD47	320	16.3
AT1G12800	AT1G12800.1	AT1G12800.1 | Symbols: | Nucleic acid-binding, OB-fold-like protein | chr1:4361778-4365189 REVERSE LENGTH=767	6	6	8.1	8.1	85.667	0	29.958	22	NA	NA	NA	NA	NA	NA	NA	NA	NA	NA	NA	NA	NA	59114000	NA	73833000	48202000	43711000	NA	NA	NA
AT1G12830	AT1G12830.1	AT1G12830.1 | Symbols: | unknown protein; FUNCTIONS IN: molecular_function unknown; INVOLVED IN: biological_process unknown; LOCATED IN: cellular_component unknown; EXPRESSED IN: 23 plant structures; EXPRESSED DURING: 13 growth stages; Has 39778 Blast hit	3	3	19.7	19.7	23.614	0	6.6548	9	NA	NA	NA	NA	NA	NA	33216000	NA	43259000	27983000	22382000	NA	NA	NA	NA	NA	NA	NA	NA	NA	NA
AT1G13020	AT1G13020.1	AT1G13020.1 | Symbols: EIF4B2 | eukaryotic initiation factor 4B2 | chr1:4440927-4443520 REVERSE LENGTH=549	18	15	36.6	31.7	59.324	0	42.113	145	NA	NA	NA	NA	NA	NA	250560000	277450000	225270000	280260000	306950000	256000000	277120000	268460000	238810000	284400000	251710000	268810000	Q9SAD7	549	100
AT1G13280	AT1G13280.1	AT1G13280.1 | Symbols: AOC4 | allene oxide cyclase 4 | chr1:4547624-4548552 FORWARD LENGTH=254	5	5	19.7	19.7	27.809	0	24.356	14	NA	NA	NA	NA	NA	NA	NA	NA	NA	NA	NA	NA	NA	NA	NA	40242000	35078000	37085000	Q93ZC5	254	31.5
AT1G13440	AT1G13440.1;AT1G13440.2	AT1G13440.1 | Symbols: GAPC-2, GAPC2 | glyceraldehyde-3-phosphate dehydrogenase C2 | chr1:4608465-4610494 REVERSE LENGTH=338;AT1G13440.2 | Symbols: GAPC-2, GAPC2 | glyceraldehyde-3-phosphate dehydrogenase C2 | chr1:4608465-4610494 REVERSE LENGTH=310	15	2	53.3	10.4	36.913	0	181.24	316	615170000	156690000	804130000	1150300000	515800000	714730000	548650000	527810000	419130000	288340000	315920000	957110000	1119200000	366320000	466970000	468680000	381130000	600160000	Q9FX54	338	0
AT1G13690	AT1G13690.1	AT1G13690.1 | Symbols: ATE1 | ATPase E1 | chr1:4693380-4694179 FORWARD LENGTH=177	4	4	32.8	32.8	19.809	0	16.444	32	NA	NA	NA	NA	NA	NA	39506000	43434000	57048000	48979000	47896000	NA	50198000	64509000	52220000	47941000	60811000	57943000	NA	NA	NA
AT1G13930	AT1G13930.3;AT1G13930.2;AT1G13930.1	AT1G13930.3 | Symbols: | Involved in response to salt stress. Knockout mutants are hypersensitive to salt stress. | chr1:4761091-4761558 FORWARD LENGTH=155;AT1G13930.2 | Symbols: | Involved in response to salt stress. Knockout mutants are hypersensitiv	7	7	59.4	59.4	16.163	0	109.85	228	339600000	290340000	297510000	235970000	299710000	389090000	897750000	949130000	715940000	1170000000	1062300000	1337900000	2810000000	2919100000	2839200000	3757700000	3235400000	2762400000	NA	NA	NA
AT1G14060	AT1G14060.1	AT1G14060.1 | Symbols: | GCK domain-containing protein | chr1:4817354-4817893 REVERSE LENGTH=179	4	4	24	24	19.427	0	11.458	14	NA	NA	NA	NA	46698000	56829000	NA	NA	44913000	NA	NA	NA	NA	NA	NA	NA	NA	NA	NA	NA	NA
AT1G14210	AT1G14210.1	AT1G14210.1 | Symbols: | Ribonuclease T2 family protein | chr1:4856902-4857941 REVERSE LENGTH=247	4	4	18.6	18.6	28.186	0	7.5217	22	NA	NA	NA	NA	NA	NA	NA	NA	NA	NA	NA	NA	26549000	NA	NA	48312000	37054000	35573000	NA	NA	NA
AT1G14320	AT1G14320.1;AT1G14320.2;AT1G66580.1;AT1G26910.1	AT1G14320.1 | Symbols: SAC52, RPL10, RPL10A | Ribosomal protein L16p/L10e family protein | chr1:4888270-4889408 FORWARD LENGTH=220;AT1G14320.2 | Symbols: SAC52, RPL10A | Ribosomal protein L16p/L10e family protein | chr1:4888270-4889408 FORWARD LENGTH=163;A	3	3	15	15	24.917	0	9.3482	21	NA	NA	NA	NA	NA	NA	NA	NA	NA	NA	NA	NA	92258000	23374000	NA	36327000	NA	32806000	Q93VT9	220	8.2
AT1G14930	AT1G14930.1	AT1G14930.1 | Symbols: | Polyketide cyclase/dehydrase and lipid transport superfamily protein | chr1:5152465-5153035 REVERSE LENGTH=155	5	5	26.5	26.5	17.892	0	11.103	35	279250000	270180000	473220000	103420000	202670000	NA	95593000	100140000	80996000	NA	NA	NA	NA	NA	NA	NA	NA	NA	NA	NA	NA
AT1G14940	AT1G14940.1;AT1G14940.2	AT1G14940.1 | Symbols: | Polyketide cyclase/dehydrase and lipid transport superfamily protein | chr1:5154775-5155512 REVERSE LENGTH=155;AT1G14940.2 | Symbols: | Polyketide cyclase/dehydrase and lipid transport superfamily protein | chr1:5154775-5155512 R	5	4	21.9	17.4	17.879	0	28.771	87	994610000	1183700000	1005300000	322740000	922650000	426260000	222900000	313510000	337990000	91292000	107490000	NA	45118000	106670000	NA	73924000	38019000	43891000	NA	NA	NA
AT1G14950	AT1G14950.1	AT1G14950.1 | Symbols: | Polyketide cyclase/dehydrase and lipid transport superfamily protein | chr1:5157588-5158144 REVERSE LENGTH=155	7	6	55.5	55.5	17.892	0	100.87	139	1186800000	1193100000	1484800000	313180000	916320000	368460000	390260000	418020000	430440000	207700000	290860000	94997000	141380000	175320000	117100000	90854000	80885000	114790000	NA	NA	NA
AT1G14980	AT1G14980.1	AT1G14980.1 | Symbols: CPN10 | chaperonin 10 | chr1:5165930-5166654 REVERSE LENGTH=98	9	9	74.5	74.5	10.812	0	100.8	337	538590000	534030000	539390000	2236700000	2138400000	2151500000	1936700000	1933500000	2434300000	1646700000	1768900000	1877300000	1728200000	1645100000	1686500000	1485500000	1340800000	1280100000	P34893	98	52
AT1G15230	AT1G15230.1	AT1G15230.1 | Symbols: | unknown protein; FUNCTIONS IN: molecular_function unknown; INVOLVED IN: biological_process unknown; LOCATED IN: cellular_component unknown; EXPRESSED IN: 24 plant structures; EXPRESSED DURING: 15 growth stages; Has 26 Blast hits t	6	6	48.4	48.4	16.467	0	56.093	47	NA	73104000	90375000	134600000	133380000	174200000	93978000	75893000	107950000	82288000	68155000	78735000	NA	NA	NA	NA	NA	NA	NA	NA	NA
AT1G15340	AT1G15340.1;AT1G15340.2	AT1G15340.1 | Symbols: MBD10 | methyl-CPG-binding domain 10 | chr1:5275895-5277474 REVERSE LENGTH=384;AT1G15340.2 | Symbols: MBD10 | methyl-CPG-binding domain 10 | chr1:5275895-5277474 REVERSE LENGTH=332	22	21	58.1	56.2	42.357	0	323.31	531	1614800000	1537500000	1347200000	2230700000	1328200000	2206400000	1040000000	1159600000	1084500000	984150000	950440000	1638800000	871530000	813430000	1125400000	1158500000	983560000	1020200000	Q9XI36	384	100
AT1G15930	AT1G15930.2;AT1G15930.1	AT1G15930.2 | Symbols: | Ribosomal protein L7Ae/L30e/S12e/Gadd45 family protein | chr1:5471702-5472741 FORWARD LENGTH=144;AT1G15930.1 | Symbols: | Ribosomal protein L7Ae/L30e/S12e/Gadd45 family protein | chr1:5471702-5472741 FORWARD LENGTH=144	10	6	60.4	42.4	15.377	0	106.04	304	NA	NA	NA	902480000	1129800000	302990000	1657100000	1527800000	1541100000	1652100000	1558900000	1016800000	1256300000	1469100000	1437500000	1356400000	1432800000	1467100000	Q9S9P1	144	13.2
AT1G16030	AT1G16030.1	AT1G16030.1 | Symbols: Hsp70b | heat shock protein 70B | chr1:5502386-5504326 REVERSE LENGTH=646	12	9	23.7	16.4	70.914	0	49.051	45	120890000	126930000	138490000	108230000	137480000	120080000	NA	NA	NA	NA	33301000	58022000	NA	NA	NA	NA	39652000	NA	Q9S9N1	646	24.8
AT1G16080	AT1G16080.1	AT1G16080.1 | Symbols: | unknown protein; LOCATED IN: apoplast, chloroplast stroma, chloroplast, chloroplast envelope; EXPRESSED IN: 23 plant structures; EXPRESSED DURING: 14 growth stages; Has 81 Blast hits to 81 proteins in 28 species: Archae - 0; Bacte	6	6	26.5	26.5	34.13	0	17.669	24	NA	NA	NA	NA	NA	NA	NA	NA	NA	37198000	36096000	NA	55975000	61963000	47423000	65447000	76711000	60279000	NA	NA	NA
AT1G16190	AT1G16190.1	AT1G16190.1 | Symbols: RAD23A | Rad23 UV excision repair protein family | chr1:5543267-5545892 FORWARD LENGTH=368	5	4	25.8	23.6	39.842	0	37.46	56	NA	NA	NA	77838000	124820000	127400000	105050000	94095000	122890000	116110000	85599000	67483000	79871000	91937000	90179000	74879000	84082000	72743000	Q84L32	368	44
AT1G16210	AT1G16210.1	AT1G16210.1 | Symbols: | unknown protein; CONTAINS InterPro DOMAIN/s: Protein of unknown function DUF1014 (InterPro:IPR010422); Has 16107 Blast hits to 8386 proteins in 1107 species: Archae - 26; Bacteria - 3370; Metazoa - 4013; Fungi - 1516; Plants - 526	7	7	29.1	29.1	26.826	0	17.296	39	NA	NA	NA	102220000	NA	84880000	34781000	28032000	64918000	NA	53780000	45750000	100970000	72737000	NA	NA	NA	85867000	NA	NA	NA
AT1G16730	AT1G16730.1	AT1G16730.1 | Symbols: UP6 | unknown protein 6 | chr1:5726617-5727312 REVERSE LENGTH=202	9	9	58.9	58.9	21.686	0	148.2	184	527420000	494290000	638010000	658340000	582300000	600850000	416370000	432570000	492000000	327850000	283020000	458590000	186460000	216480000	240060000	197320000	187890000	213130000	NA	NA	NA
AT1G16850	AT1G16850.1	AT1G16850.1 | Symbols: | unknown protein; FUNCTIONS IN: molecular_function unknown; INVOLVED IN: response to salt stress; LOCATED IN: endomembrane system; EXPRESSED IN: leaf apex, leaf whorl, male gametophyte, flower, leaf; EXPRESSED DURING: LP.06 six lea	7	7	42.1	42.1	16.704	0	54.864	125	796760000	457570000	958860000	639270000	421020000	371120000	310800000	290990000	331450000	279840000	234020000	326700000	145550000	174050000	174690000	136570000	155880000	126070000	NA	NA	NA
AT1G16880	AT1G16880.2;AT1G16880.1	AT1G16880.2 | Symbols: | uridylyltransferase-related | chr1:5773796-5775272 FORWARD LENGTH=213;AT1G16880.1 | Symbols: | uridylyltransferase-related | chr1:5773796-5776125 FORWARD LENGTH=290	5	5	26.3	26.3	22.673	0	14.602	65	NA	NA	NA	NA	NA	NA	NA	NA	NA	82333000	83439000	64186000	197540000	172970000	188520000	306900000	273550000	268110000	Q9FZ47	290	3.4
AT1G17220	AT1G17220.1	AT1G17220.1 | Symbols: FUG1 | Translation initiation factor 2, small GTP-binding protein | chr1:5885383-5890165 FORWARD LENGTH=1026	5	5	6.3	6.3	109.75	0	15.841	25	NA	NA	NA	NA	NA	NA	NA	NA	NA	NA	49601000	NA	76167000	71122000	58555000	110200000	92631000	74781000	NA	NA	NA
AT1G17880	AT1G17880.1	AT1G17880.1 | Symbols: BTF3, ATBTF3 | basic transcription factor 3 | chr1:6152572-6153425 REVERSE LENGTH=165	7	4	55.2	43.6	17.946	0	71.766	124	250060000	290580000	319180000	1023200000	920290000	649000000	793320000	1004800000	1061100000	663070000	614090000	954160000	461090000	459570000	381470000	300140000	433370000	314960000	Q9SMW7	165	75.8
AT1G18080	AT1G18080.1	AT1G18080.1 | Symbols: ATARCA, RACK1A_AT, RACK1A | Transducin/WD40 repeat-like superfamily protein | chr1:6222325-6223901 FORWARD LENGTH=327	5	3	17.4	12.5	35.747	0	7.5249	18	NA	NA	NA	NA	NA	NA	35352000	28069000	20484000	NA	21219000	30407000	97118000	18864000	NA	NA	16418000	49433000	O24456	327	0
AT1G18210	AT1G18210.2;AT1G18210.1	AT1G18210.2 | Symbols: | Calcium-binding EF-hand family protein | chr1:6268273-6268785 REVERSE LENGTH=170;AT1G18210.1 | Symbols: | Calcium-binding EF-hand family protein | chr1:6268273-6268785 REVERSE LENGTH=170	12	12	76.5	76.5	18.35	0	323.31	557	795720000	784830000	700540000	1423600000	1547800000	1376700000	1357500000	1210000000	1433800000	925910000	923790000	1601200000	979270000	1121700000	1091800000	1018700000	1090000000	976190000	Q9LE22	170	33.5
AT1G19320	AT1G19320.1	AT1G19320.1 | Symbols: | Pathogenesis-related thaumatin superfamily protein | chr1:6679327-6680178 FORWARD LENGTH=247	4	4	20.6	20.6	25.43	0	16.366	29	93348000	NA	117540000	99393000	117170000	318540000	NA	NA	96937000	NA	41875000	NA	NA	NA	NA	NA	NA	NA	NA	NA	NA
AT1G19870	AT1G19870.1	AT1G19870.1 | Symbols: iqd32 | IQ-domain 32 | chr1:6895400-6898539 REVERSE LENGTH=794	7	7	10.6	10.6	86.881	0	24.309	16	NA	NA	NA	NA	NA	NA	NA	NA	NA	25864000	24063000	58363000	NA	27598000	NA	NA	NA	NA	Q9FXI5	794	100
AT1G20010	AT1G20010.1;AT1G75780.1	AT1G20010.1 | Symbols: TUB5 | tubulin beta-5 chain | chr1:6938033-6940481 REVERSE LENGTH=449;AT1G75780.1 | Symbols: TUB1 | tubulin beta-1 chain | chr1:28451378-28453602 REVERSE LENGTH=447	4	2	13.4	5.3	50.342	0	21.525	13	NA	NA	NA	NA	NA	NA	NA	NA	NA	NA	NA	NA	42138000	32590000	33659000	28758000	NA	31838000	P29513	449	7.3
AT1G20440	AT1G20440.1	AT1G20440.1 | Symbols: COR47, RD17, AtCOR47 | cold-regulated 47 | chr1:7084722-7085664 REVERSE LENGTH=265	15	13	74.3	70.9	29.896	0	323.31	582	NA	NA	NA	1332400000	1581100000	1953200000	2670000000	2611300000	2784800000	3368900000	3038400000	4280000000	4157500000	4248500000	5071700000	2287500000	2141500000	2717900000	P31168	265	100
AT1G20450	AT1G20450.2;AT1G20450.1	AT1G20450.2 | Symbols: LTI29, LTI45, ERD10 | Dehydrin family protein | chr1:7088235-7089107 REVERSE LENGTH=259;AT1G20450.1 | Symbols: LTI29, LTI45, ERD10 | Dehydrin family protein | chr1:7088235-7089107 REVERSE LENGTH=260	5	5	29	29	29.443	0	31.052	63	NA	NA	NA	NA	NA	108670000	151250000	162230000	156520000	198910000	186890000	308650000	245420000	259410000	310900000	149170000	113650000	183920000	P42759	260	100
AT1G20620	AT1G20620.5;AT1G20620.1;AT1G20620.2;AT1G20620.4	AT1G20620.5 | Symbols: CAT3, SEN2, ATCAT3 | catalase 3 | chr1:7143142-7146193 FORWARD LENGTH=485;AT1G20620.1 | Symbols: CAT3, SEN2, ATCAT3 | catalase 3 | chr1:7143142-7146193 FORWARD LENGTH=492;AT1G20620.2 | Symbols: CAT3, SEN2, ATCAT3 | catalase 3 | chr1:	14	9	36.3	22.3	55.967	0	127.11	105	53898000	NA	192610000	97521000	116780000	74802000	136400000	144020000	114280000	71269000	98756000	131380000	601490000	112910000	148570000	213780000	126040000	254100000	Q42547	492	2
AT1G20760	AT1G20760.1	AT1G20760.1 | Symbols: | Calcium-binding EF hand family protein | chr1:7209515-7214773 FORWARD LENGTH=1019	7	7	8.9	8.9	109.82	0	12.27	20	NA	NA	NA	NA	NA	NA	NA	NA	NA	39415000	40960000	NA	32930000	30895000	55219000	46112000	42000000	NA	NA	NA	NA
AT1G20970	AT1G20970.1	AT1G20970.1 | Symbols: | FUNCTIONS IN: molecular_function unknown; INVOLVED IN: biological_process unknown; LOCATED IN: plasma membrane, vacuole; EXPRESSED IN: guard cell, cultured cell; BEST Arabidopsis thaliana protein match is: proton pump interactor 1	11	11	11	11	150.16	0	94.779	59	NA	NA	NA	65822000	67792000	59073000	131710000	155950000	134870000	92794000	105680000	92749000	69704000	56092000	80497000	NA	59158000	NA	NA	NA	NA
AT1G21380	AT1G21380.1	AT1G21380.1 | Symbols: | Target of Myb protein 1 | chr1:7485806-7488032 REVERSE LENGTH=506	4	3	10.5	7.7	55.791	0	32.415	32	NA	NA	NA	NA	NA	NA	NA	NA	NA	NA	32691000	32870000	NA	28517000	25587000	30842000	29303000	31235000	Q9LPL6	506	47.2
AT1G21630	AT1G21630.1;AT1G21630.2	AT1G21630.1 | Symbols: | Calcium-binding EF hand family protein | chr1:7581457-7587796 FORWARD LENGTH=1218;AT1G21630.2 | Symbols: | Calcium-binding EF hand family protein | chr1:7581457-7587796 FORWARD LENGTH=1247	4	4	5.8	5.8	131.85	0	9.9634	16	NA	NA	NA	NA	NA	NA	NA	NA	NA	22437000	23066000	25810000	22547000	25806000	25096000	23644000	23074000	25239000	NA	NA	NA
AT1G21660	AT1G21660.1	AT1G21660.1 | Symbols: | Chaperone DnaJ-domain superfamily protein | chr1:7605924-7608835 FORWARD LENGTH=523	3	3	9.2	9.2	56.91	0	7.4212	5	NA	NA	NA	NA	NA	NA	NA	NA	NA	30292000	NA	39488000	NA	NA	NA	NA	NA	NA	NA	NA	NA
AT1G21750	AT1G21750.1;AT1G21750.2	AT1G21750.1 | Symbols: ATPDIL1-1, ATPDI5, PDI5, PDIL1-1 | PDI-like 1-1 | chr1:7645767-7648514 FORWARD LENGTH=501;AT1G21750.2 | Symbols: ATPDIL1-1, PDIL1-1 | PDI-like 1-1 | chr1:7645767-7648695 FORWARD LENGTH=487	41	35	68.7	61.9	55.601	0	323.31	1673	859150000	689470000	1899500000	3990100000	7053800000	5398200000	8896400000	8940000000	8388700000	10100000000	10500000000	4022900000	6922400000	7534600000	7193600000	5633400000	7268800000	5852100000	Q9XI01	501	9.6
AT1G21880	AT1G21880.2;AT1G21880.1	AT1G21880.2 | Symbols: LYM1 | lysm domain GPI-anchored protein 1 precursor | chr1:7680689-7682526 FORWARD LENGTH=416;AT1G21880.1 | Symbols: LYM1 | lysm domain GPI-anchored protein 1 precursor | chr1:7680689-7682048 FORWARD LENGTH=316	5	2	11.1	7	43.489	0	109.87	211	172020000	147160000	155800000	222890000	160590000	241520000	189020000	208130000	186490000	161010000	185210000	277530000	201720000	195970000	241030000	263790000	264250000	263420000	Q93ZH0	416	12.3
AT1G22300	AT1G22300.2;AT1G22300.1;AT1G22300.3	AT1G22300.2 | Symbols: GRF10, GF14 EPSILON | general regulatory factor 10 | chr1:7879244-7881103 REVERSE LENGTH=254;AT1G22300.1 | Symbols: GRF10, 14-3-3EPSILON, GF14 EPSILON | general regulatory factor 10 | chr1:7879146-7881103 REVERSE LENGTH=254;AT1G22300	6	5	26.8	22.8	28.9	0	87.393	31	NA	NA	NA	NA	134590000	NA	NA	NA	NA	474220000	483370000	NA	272870000	252080000	185160000	NA	NA	NA	P48347	254	17.3
AT1G22450	AT1G22450.1	AT1G22450.1 | Symbols: COX6B, ATCOX6B2 | cytochrome C oxidase 6B | chr1:7925447-7926918 FORWARD LENGTH=191	9	9	47.6	47.6	21.195	0	105.09	168	NA	NA	146250000	329700000	253910000	323730000	303700000	307830000	349180000	307610000	245790000	403900000	165450000	172770000	201070000	178040000	164710000	147940000	Q9S7L9	191	100
AT1G22530	AT1G22530.1	AT1G22530.1 | Symbols: PATL2 | PATELLIN 2 | chr1:7955773-7958326 REVERSE LENGTH=683	19	18	31.5	30	76.007	0	129.62	317	NA	NA	NA	216390000	207330000	626910000	508380000	568990000	555100000	647970000	738350000	982740000	823220000	685220000	813710000	997790000	860500000	890450000	Q56ZI2	683	46
AT1G22840	AT1G22840.1;AT1G22840.2	AT1G22840.1 | Symbols: CYTC-1, ATCYTC-A | CYTOCHROME C-1 | chr1:8079384-8080286 FORWARD LENGTH=114;AT1G22840.2 | Symbols: CYTC-1, ATCYTC-A | CYTOCHROME C-1 | chr1:8079384-8080246 FORWARD LENGTH=102	4	2	40.4	23.7	12.394	0	27.507	103	295740000	318450000	327360000	126730000	76158000	244070000	172430000	129290000	137450000	211230000	154590000	249500000	183250000	197570000	259080000	227030000	202660000	227670000	O23138	114	50.9
AT1G23100	AT1G23100.1	AT1G23100.1 | Symbols: | GroES-like family protein | chr1:8195867-8196336 FORWARD LENGTH=97	6	6	56.7	56.7	10.546	0	14.422	169	NA	NA	NA	575730000	406760000	533370000	499230000	480900000	471030000	343840000	393260000	556620000	293490000	290150000	322450000	310120000	274530000	263980000	NA	NA	NA
AT1G24020	AT1G24020.2;AT1G24020.1	AT1G24020.2 | Symbols: MLP423 | MLP-like protein 423 | chr1:8500653-8501458 REVERSE LENGTH=155;AT1G24020.1 | Symbols: MLP423 | MLP-like protein 423 | chr1:8500653-8501458 REVERSE LENGTH=155	6	6	43.2	43.2	17.054	0	27.676	48	NA	NA	NA	NA	NA	NA	NA	NA	NA	151440000	170030000	NA	176510000	229190000	233180000	135860000	162880000	144070000	Q93VR4	155	0
AT1G24300	AT1G24300.2;AT1G24300.1;AT1G27430.1	AT1G24300.2 | Symbols: | GYF domain-containing protein | chr1:8614515-8620420 REVERSE LENGTH=1490;AT1G24300.1 | Symbols: | GYF domain-containing protein | chr1:8614515-8620420 REVERSE LENGTH=1495;AT1G27430.1 | Symbols: | GYF domain-containing protein |	4	4	3.9	3.9	165.68	0	7.326	18	NA	NA	NA	NA	NA	NA	NA	NA	NA	62086000	39001000	NA	38743000	NA	NA	NA	41552000	NA	NA	NA	NA
AT1G26110	AT1G26110.2;AT1G26110.1	AT1G26110.2 | Symbols: DCP5 | decapping 5 | chr1:9024616-9027556 REVERSE LENGTH=605;AT1G26110.1 | Symbols: DCP5 | decapping 5 | chr1:9024616-9027556 REVERSE LENGTH=611	10	10	20.5	20.5	63.66	0	132.12	121	NA	NA	NA	123830000	105050000	104120000	155840000	135590000	167450000	163960000	212950000	175070000	202520000	234630000	235520000	178510000	215520000	207150000	Q9C658	611	100
AT1G26630	AT1G26630.1;AT1G26630.2	AT1G26630.1 | Symbols: FBR12, ATELF5A-2, ELF5A-2 | Eukaryotic translation initiation factor 5A-1 (eIF-5A 1) protein | chr1:9205968-9207098 FORWARD LENGTH=159;AT1G26630.2 | Symbols: FBR12, ATELF5A-2, ELF5A-2 | Eukaryotic translation initiation factor 5A-1 (	10	7	66.7	49.7	17.14	0	323.31	786	1870900000	1879100000	2130500000	4239400000	4610000000	2581600000	3700000000	3118100000	3534200000	4820200000	4133400000	2492900000	3133800000	3080300000	3410100000	2780900000	3310000000	2967900000	Q93VP3	159	17.6
AT1G27950	AT1G27950.1	AT1G27950.1 | Symbols: LTPG1 | glycosylphosphatidylinositol-anchored lipid protein transfer 1 | chr1:9740740-9741991 FORWARD LENGTH=193	8	8	33.2	33.2	19.759	0	291.29	510	1490300000	2157700000	1118800000	2286300000	2475400000	2016300000	2521200000	2350500000	2511500000	2896100000	3000100000	5065900000	2385700000	3204500000	4040000000	3926700000	3344700000	3708300000	Q9C7F7	193	26.4
AT1G28330	AT1G28330.1;AT1G28330.4;AT1G28330.3;AT1G28330.2;AT1G28330.5	AT1G28330.1 | Symbols: DRM1, DYL1 | dormancy-associated protein-like 1 | chr1:9934252-9935216 REVERSE LENGTH=122;AT1G28330.4 | Symbols: | dormancy-associated protein-like 1 | chr1:9934134-9935216 REVERSE LENGTH=125;AT1G28330.3 | Symbols: DYL1 | dormancy-a	3	3	25.4	25.4	13.406	0	13.355	9	60047000	NA	55580000	NA	NA	NA	NA	NA	NA	NA	NA	NA	NA	NA	NA	NA	NA	NA	B9DGG8	132	100
AT1G29090	AT1G29090.1	AT1G29090.1 | Symbols: | Cysteine proteinases superfamily protein | chr1:10163103-10164385 REVERSE LENGTH=355	5	5	16.6	16.6	39.937	0	108.82	34	NA	NA	NA	NA	NA	NA	86570000	93508000	79693000	54992000	79186000	NA	NA	56560000	69729000	56272000	53033000	42993000	NA	NA	NA
AT1G29680	AT1G29680.1	AT1G29680.1 | Symbols: | Protein of unknown function (DUF1264) | chr1:10377900-10378931 REVERSE LENGTH=237	3	3	15.6	15.6	26.875	0	8.5218	15	NA	NA	43368000	NA	54678000	NA	NA	NA	NA	33725000	35614000	NA	NA	NA	NA	NA	NA	NA	Q9C7N3	237	15.6
AT1G29850	AT1G29850.1;AT1G29850.2;AT1G29850.3	AT1G29850.1 | Symbols: | double-stranded DNA-binding family protein | chr1:10447866-10449630 FORWARD LENGTH=129;AT1G29850.2 | Symbols: | double-stranded DNA-binding family protein | chr1:10447866-10449630 FORWARD LENGTH=130;AT1G29850.3 | Symbols: | doub	7	7	41.9	41.9	14.975	0	100.6	175	145780000	197510000	172770000	229230000	148500000	271130000	160850000	174520000	178390000	194940000	170410000	182300000	169890000	205740000	294590000	257650000	162250000	193430000	NA	NA	NA
AT1G29980	AT1G29980.2;AT1G29980.1	AT1G29980.2 | Symbols: | Protein of unknown function, DUF642 | chr1:10503411-10504617 REVERSE LENGTH=371;AT1G29980.1 | Symbols: | Protein of unknown function, DUF642 | chr1:10503411-10505994 REVERSE LENGTH=407	3	3	9.4	9.4	40.437	0	9.024	33	NA	NA	NA	40659000	NA	38926000	NA	NA	NA	49879000	37189000	46043000	NA	NA	NA	NA	NA	NA	NA	NA	NA
AT1G29990	AT1G29990.1	AT1G29990.1 | Symbols: PFD6 | prefoldin 6 | chr1:10507666-10508821 FORWARD LENGTH=129	6	6	48.8	48.8	14.856	0	15.101	60	NA	NA	NA	156540000	117140000	175410000	NA	131180000	108370000	112630000	120070000	106070000	95004000	83908000	124320000	140070000	97606000	98247000	NA	NA	NA
AT1G30230	AT1G30230.1;AT1G30230.2	AT1G30230.1 | Symbols: | Glutathione S-transferase, C-terminal-like;Translation elongation factor EF1B/ribosomal protein S6 | chr1:10639286-10640515 FORWARD LENGTH=231;AT1G30230.2 | Symbols: | Glutathione S-transferase, C-terminal-like;Translation elong	10	8	56.3	51.9	25.132	0	323.31	241	343770000	436000000	506030000	415330000	460070000	910330000	401550000	511010000	373720000	585940000	580550000	571700000	457350000	393650000	467570000	312910000	351390000	350650000	P48006	231	32
AT1G30470	AT1G30470.3;AT1G30470.2;AT1G30470.1	AT1G30470.3 | Symbols: | SIT4 phosphatase-associated family protein | chr1:10779435-10786415 FORWARD LENGTH=764;AT1G30470.2 | Symbols: | SIT4 phosphatase-associated family protein | chr1:10779435-10786415 FORWARD LENGTH=805;AT1G30470.1 | Symbols: | SIT4	8	8	10.5	10.5	84.28	0	34.711	45	NA	NA	NA	NA	45567000	128590000	93369000	89396000	88809000	70693000	65522000	129240000	62318000	84247000	103800000	90517000	81818000	99114000	NA	NA	NA
AT1G30690	AT1G30690.2;AT1G30690.1	AT1G30690.2 | Symbols: | Sec14p-like phosphatidylinositol transfer family protein | chr1:10888284-10890085 FORWARD LENGTH=540;AT1G30690.1 | Symbols: | Sec14p-like phosphatidylinositol transfer family protein | chr1:10888284-10890085 FORWARD LENGTH=540	6	6	13.5	13.5	61.189	0	18.595	22	NA	NA	NA	NA	NA	NA	NA	NA	NA	63627000	62767000	103470000	NA	NA	NA	NA	NA	NA	Q94C59	540	41.7
AT1G31730	AT1G31730.1	AT1G31730.1 | Symbols: | Adaptin family protein | chr1:11359907-11363916 FORWARD LENGTH=938	3	3	3	3	103.73	0	9.5976	13	NA	NA	NA	NA	NA	NA	NA	NA	NA	NA	NA	NA	32330000	NA	26794000	NA	NA	NA	Q8L7A9	938	24.8
AT1G31812	AT1G31812.1	AT1G31812.1 | Symbols: ACBP6, ACBP | acyl-CoA-binding protein 6 | chr1:11411132-11412099 REVERSE LENGTH=92	4	4	55.4	55.4	10.386	0	39.791	201	440710000	515320000	630620000	477650000	325250000	453050000	206560000	311690000	282660000	992610000	1006200000	630430000	706430000	1137600000	982120000	958410000	979730000	973530000	P57752	92	44.6
AT1G32710	AT1G32710.1	AT1G32710.1 | Symbols: | Cytochrome c oxidase, subunit Vib family protein | chr1:11833113-11833706 FORWARD LENGTH=134	6	6	41	41	15.48	0	207.33	148	774560000	942660000	563860000	406140000	296480000	369220000	276020000	247470000	271940000	249750000	191220000	151700000	146190000	178250000	190080000	197220000	150830000	144210000	Q9LPJ2	134	100
AT1G32990	AT1G32990.1	AT1G32990.1 | Symbols: PRPL11 | plastid ribosomal protein l11 | chr1:11955827-11957139 FORWARD LENGTH=222	4	4	22.1	22.1	23.148	0	6.9136	23	NA	NA	NA	NA	NA	NA	NA	NA	NA	NA	NA	NA	87105000	44365000	54430000	107510000	66855000	105870000	Q9MAP3	222	6.8
AT1G33040	AT1G33040.1	AT1G33040.1 | Symbols: NACA5 | nascent polypeptide-associated complex subunit alpha-like protein 5 | chr1:11966547-11967696 FORWARD LENGTH=209	5	5	29.2	29.2	22.78	0	73.559	181	NA	NA	NA	236750000	181620000	214560000	288700000	261350000	330580000	378170000	308530000	510360000	353000000	376170000	386270000	262350000	335970000	329650000	Q8LGC6	209	92.3
AT1G33140	AT1G33140.1;AT1G33120.1;AT4G10450.1	AT1G33140.1 | Symbols: PGY2 | Ribosomal protein L6 family | chr1:12023360-12024502 FORWARD LENGTH=194;AT1G33120.1 | Symbols: | Ribosomal protein L6 family | chr1:12010986-12012223 FORWARD LENGTH=194;AT4G10450.1 | Symbols: | Ribosomal protein L6 family |	4	4	23.7	23.7	22.017	0	71.617	28	NA	NA	NA	NA	NA	NA	NA	40593000	NA	NA	32732000	83508000	113940000	27694000	36644000	34387000	33838000	52349000	P49209	194	0
AT1G33680	AT1G33680.1	AT1G33680.1 | Symbols: | KH domain-containing protein | chr1:12204056-12208282 FORWARD LENGTH=763	12	11	19.9	18.9	80.438	0	49.118	56	NA	NA	NA	NA	NA	NA	115390000	130020000	96428000	127950000	123070000	120850000	109420000	91914000	62397000	105170000	102230000	104940000	NA	NA	NA
AT1G34430	AT1G34430.1	AT1G34430.1 | Symbols: EMB3003 | 2-oxoacid dehydrogenases acyltransferase family protein | chr1:12588027-12590084 REVERSE LENGTH=465	2	2	6	6	48.306	0	17.733	11	NA	NA	NA	NA	NA	NA	NA	NA	NA	NA	NA	NA	NA	NA	NA	34652000	28818000	45810000	Q9C8P0	465	27.7
AT1G35160	AT1G35160.1;AT1G35160.2	AT1G35160.1 | Symbols: GRF4, 14-3-3PHI, GF14 PHI | GF14 protein phi chain | chr1:12867264-12868514 FORWARD LENGTH=267;AT1G35160.2 | Symbols: GF14 PHI | GF14 protein phi chain | chr1:12867264-12868514 FORWARD LENGTH=295	13	6	51.7	25.5	30.194	0	54.217	114	NA	NA	NA	70520000	401020000	84772000	292720000	259200000	177090000	750750000	882860000	69554000	506770000	435040000	526240000	230440000	403270000	418120000	P46077	267	21.7
AT1G36730	AT1G36730.1	AT1G36730.1 | Symbols: | Translation initiation factor IF2/IF5 | chr1:13898706-13900025 REVERSE LENGTH=439	2	2	5.9	5.9	48.622	0	18.997	20	NA	NA	NA	59755000	43558000	90992000	NA	NA	NA	36872000	27810000	61087000	NA	NA	NA	NA	NA	NA	Q9C8F1	439	41.7
AT1G42480	AT1G42480.3;AT1G42480.1	AT1G42480.3 | Symbols: | unknown protein; FUNCTIONS IN: molecular_function unknown; INVOLVED IN: biological_process unknown; LOCATED IN: endomembrane system; EXPRESSED IN: 24 plant structures; EXPRESSED DURING: 13 growth stages; CONTAINS InterPro DOMAIN/s	4	4	26.4	26.4	20.218	0	70.585	101	NA	NA	NA	NA	NA	95703000	128660000	167590000	167500000	143130000	121570000	197700000	149610000	150550000	141030000	67161000	77301000	83971000	NA	NA	NA
AT1G42970	AT1G42970.1	AT1G42970.1 | Symbols: GAPB | glyceraldehyde-3-phosphate dehydrogenase B subunit | chr1:16127552-16129584 FORWARD LENGTH=447	15	12	40.9	34.2	47.659	0	61.446	86	NA	NA	NA	NA	NA	NA	NA	NA	NA	NA	31842000	43192000	535560000	97699000	60564000	386120000	175230000	567910000	P25857	447	11
AT1G43560	AT1G43560.1	AT1G43560.1 | Symbols: Aty2, ty2 | thioredoxin Y2 | chr1:16398359-16399828 REVERSE LENGTH=167	6	6	30.5	30.5	18.592	0	12.601	84	NA	NA	NA	NA	63613000	102730000	119460000	105750000	91856000	217880000	211810000	248950000	284690000	310220000	290390000	383920000	406030000	354650000	Q8L7S9	167	31.7
AT1G43670	AT1G43670.1	AT1G43670.1 | Symbols: | Inositol monophosphatase family protein | chr1:16468184-16470347 FORWARD LENGTH=341	5	5	20.8	20.8	37.287	0	34.824	31	NA	NA	NA	NA	76515000	NA	NA	39972000	NA	NA	35836000	NA	65692000	NA	NA	56761000	47066000	58353000	Q9MA79	341	3.5
AT1G45145	AT1G45145.1	AT1G45145.1 | Symbols: ATTRX5, ATH5, LIV1, TRX5 | thioredoxin H-type 5 | chr1:17075264-17076256 REVERSE LENGTH=118	3	3	33.9	33.9	13.122	0	67.614	22	NA	NA	NA	NA	NA	NA	NA	NA	NA	45430000	50472000	NA	NA	NA	NA	42339000	35419000	39206000	Q39241	118	0
AT1G47128	AT1G47128.1	AT1G47128.1 | Symbols: RD21, RD21A | Granulin repeat cysteine protease family protein | chr1:17283139-17285609 REVERSE LENGTH=462	14	14	28.6	28.6	50.966	0	204.8	469	NA	NA	NA	28229000	179100000	45441000	1250400000	1260000000	1041700000	2430000000	2500900000	665170000	2090800000	2503800000	2534200000	2450400000	2976300000	2486500000	P43297	462	11.9
AT1G47200	AT1G47200.1	AT1G47200.1 | Symbols: WPP2 | WPP domain protein 2 | chr1:17298181-17298723 REVERSE LENGTH=180	7	6	50.6	43.3	19.134	0	210.11	227	250700000	320530000	241100000	459530000	397860000	538120000	340830000	531770000	410030000	576630000	487120000	533940000	325270000	374240000	326900000	332300000	423680000	435600000	Q9C500	180	100
AT1G47420	AT1G47420.1	AT1G47420.1 | Symbols: SDH5 | succinate dehydrogenase 5 | chr1:17395774-17397176 REVERSE LENGTH=257	3	3	19.1	19.1	28.106	0	62.836	28	NA	NA	NA	NA	NA	NA	53431000	NA	NA	57319000	48233000	NA	37904000	43320000	NA	NA	52891000	NA	Q9SX77	257	0
AT1G47540	AT1G47540.1;AT1G47540.2	AT1G47540.1 | Symbols: | Scorpion toxin-like knottin superfamily protein | chr1:17455702-17456146 REVERSE LENGTH=98;AT1G47540.2 | Symbols: | Scorpion toxin-like knottin superfamily protein | chr1:17455702-17456146 REVERSE LENGTH=99	4	4	29.6	29.6	10.993	0	323.31	881	31900000000	32100000000	26000000000	22700000000	15200000000	23000000000	14300000000	10500000000	12800000000	5595200000	5350700000	9828400000	1890100000	3225800000	2873800000	1620200000	1715600000	1896500000	Q42330	98	0
AT1G47710	AT1G47710.1	AT1G47710.1 | Symbols: | Serine protease inhibitor (SERPIN) family protein | chr1:17558271-17560061 FORWARD LENGTH=391	10	10	28.9	28.9	42.639	0	25.867	64	NA	NA	42589000	99492000	203910000	107340000	111750000	82420000	114110000	53175000	53690000	75907000	46630000	62767000	58948000	41097000	52603000	63447000	Q9S7T8	391	0
AT1G48030	AT1G48030.2;AT1G48030.1;AT3G17240.3;AT3G17240.1	AT1G48030.2 | Symbols: mtLPD1 | mitochondrial lipoamide dehydrogenase 1 | chr1:17717432-17719141 REVERSE LENGTH=507;AT1G48030.1 | Symbols: mtLPD1 | mitochondrial lipoamide dehydrogenase 1 | chr1:17717432-17719141 REVERSE LENGTH=507;AT3G17240.3 | Symbols: m	8	8	20.9	20.9	53.987	0	16.415	24	NA	NA	NA	NA	NA	NA	NA	NA	NA	NA	NA	NA	142830000	NA	44419000	139370000	69944000	117480000	Q9M5K3	507	1.6
AT1G48130	AT1G48130.1	AT1G48130.1 | Symbols: ATPER1, PER1 | 1-cysteine peroxiredoxin 1 | chr1:17780610-17781500 FORWARD LENGTH=216	11	11	55.6	55.6	24.081	0	323.31	772	10000000000	11300000000	14600000000	8927500000	9577600000	6027200000	4574500000	4875100000	5590000000	3210900000	3974900000	2254400000	1786600000	2208100000	2147300000	1149300000	1481900000	1384200000	O04005	216	14.8
AT1G49600	AT1G49600.1;AT1G47490.2;AT1G47490.1;AT1G47500.1	AT1G49600.1 | Symbols: ATRBP47A, RBP47A | RNA-binding protein 47A | chr1:18357236-18360150 REVERSE LENGTH=445;AT1G47490.2 | Symbols: ATRBP47C, RBP47C | RNA-binding protein 47C | chr1:17424801-17426114 FORWARD LENGTH=310;AT1G47490.1 | Symbols: ATRBP47C, RBP	3	3	6.3	6.3	48.483	0	10.506	16	NA	NA	NA	NA	NA	NA	NA	NA	NA	53565000	69659000	NA	NA	NA	NA	NA	NA	NA	F4I3B3	445	42.7
AT1G49760	AT1G49760.2;AT1G49760.1	AT1G49760.2 | Symbols: PAB8 | poly(A) binding protein 8 | chr1:18416740-18419753 FORWARD LENGTH=671;AT1G49760.1 | Symbols: PAB8, PABP8 | poly(A) binding protein 8 | chr1:18416740-18419753 FORWARD LENGTH=671	8	8	16.2	16.2	72.779	0	30.328	91	NA	NA	NA	232140000	NA	680620000	303450000	350970000	355420000	219650000	201900000	459270000	203500000	244610000	227740000	213490000	247380000	200010000	Q9FXA2	671	39.3
AT1G50010	AT1G50010.1;AT1G04820.1;AT4G14960.2;AT4G14960.1;AT5G19780.1;AT5G19770.1	AT1G50010.1 | Symbols: TUA2 | tubulin alpha-2 chain | chr1:18517737-18519729 FORWARD LENGTH=450;AT1G04820.1 | Symbols: TUA4, TOR2 | tubulin alpha-4 chain | chr1:1356421-1358266 REVERSE LENGTH=450;AT4G14960.2 | Symbols: TUA6 | Tubulin/FtsZ family protein |	12	12	32.4	32.4	49.54	0	127.1	143	NA	NA	NA	NA	NA	148680000	154700000	95388000	88170000	126940000	160240000	391430000	474090000	197340000	237300000	205780000	177170000	265790000	B9DGT7	450	6.9
AT1G50900	AT1G50900.1	AT1G50900.1 | Symbols: GDC1 | Ankyrin repeat family protein | chr1:18866272-18867014 FORWARD LENGTH=175	2	2	13.7	13.7	19.189	0	82.284	9	NA	NA	NA	NA	NA	NA	NA	NA	NA	NA	NA	NA	NA	NA	NA	158800000	102260000	106430000	Q8VY88	175	7.4
AT1G51510	AT1G51510.1	AT1G51510.1 | Symbols: Y14 | RNA-binding (RRM/RBD/RNP motifs) family protein | chr1:19103072-19104753 REVERSE LENGTH=202	5	5	22.3	22.3	22.438	0	17.038	84	NA	NA	NA	95309000	144830000	70785000	184500000	179420000	173600000	187460000	191990000	100370000	155240000	163760000	163370000	110090000	126090000	128460000	F4I9J7	202	61.9
AT1G52380	AT1G52380.1	AT1G52380.1 | Symbols: | NUP50 (Nucleoporin 50 kDa) protein | chr1:19509979-19511301 FORWARD LENGTH=440	11	11	34.3	34.3	46.592	0	159.18	165	160450000	106990000	71940000	350440000	345130000	453960000	292350000	340080000	334750000	303280000	256620000	350290000	168730000	227710000	191950000	203660000	196260000	206260000	Q9C829	440	55.7
AT1G52560	AT1G52560.2;AT1G52560.1	AT1G52560.2 | Symbols: | HSP20-like chaperones superfamily protein | chr1:19574783-19575766 REVERSE LENGTH=225;AT1G52560.1 | Symbols: | HSP20-like chaperones superfamily protein | chr1:19574783-19575766 REVERSE LENGTH=232	5	5	25.3	25.3	25.713	0	12.601	39	90323000	76589000	96290000	122130000	124300000	118430000	62357000	50027000	75803000	NA	NA	39323000	NA	NA	NA	NA	NA	NA	Q9SSQ8	232	42.7
AT1G52670	AT1G52670.1	AT1G52670.1 | Symbols: | Single hybrid motif superfamily protein | chr1:19615119-19617420 REVERSE LENGTH=274	3	3	21.9	21.9	29.573	0	65.698	23	NA	NA	NA	NA	NA	28926000	NA	37948000	24909000	34900000	32806000	37786000	32230000	23595000	NA	NA	43428000	21814000	NA	NA	NA
AT1G52690	AT1G52690.2;AT1G52690.1	AT1G52690.2 | Symbols: | Late embryogenesis abundant protein (LEA) family protein | chr1:19619842-19620589 FORWARD LENGTH=169;AT1G52690.1 | Symbols: | Late embryogenesis abundant protein (LEA) family protein | chr1:19619842-19620589 FORWARD LENGTH=169	10	10	56.8	56.8	18.1	0	323.31	523	11600000000	8652700000	11600000000	5765200000	3421100000	5859800000	1560800000	1492300000	1870000000	966080000	902830000	1189500000	422500000	545920000	567670000	384940000	302990000	377020000	Q96270	169	100
AT1G53030	AT1G53030.1;AT3G15352.1	AT1G53030.1 | Symbols: | Cytochrome C oxidase copper chaperone (COX17) | chr1:19760224-19760442 REVERSE LENGTH=72;AT3G15352.1 | Symbols: ATCOX17, COX17 | cytochrome c oxidase 17 | chr3:5180266-5180490 FORWARD LENGTH=74	2	2	13.9	13.9	7.9382	0	4.8445	14	NA	NA	NA	NA	NA	NA	26193000	NA	24735000	20294000	19982000	27395000	NA	NA	NA	NA	NA	NA	Q94FT1	72	40.3
AT1G53240	AT1G53240.1;AT3G15020.1;AT3G15020.2	AT1G53240.1 | Symbols: mMDH1 | Lactate/malate dehydrogenase family protein | chr1:19854966-19856802 REVERSE LENGTH=341;AT3G15020.1 | Symbols: mMDH2 | Lactate/malate dehydrogenase family protein | chr3:5056139-5057941 FORWARD LENGTH=341;AT3G15020.2 | Symbol	9	8	39.9	36.7	35.804	0	76.257	115	NA	NA	96773000	78420000	87093000	200260000	93454000	108790000	90899000	106290000	117830000	116830000	235310000	101850000	114980000	118050000	111740000	130160000	Q9ZP06	341	3.2
AT1G53580	AT1G53580.2;AT1G53580.1	AT1G53580.2 | Symbols: GLX2-3, ETHE1, GLY3 | glyoxalase II 3 | chr1:19991542-19993250 REVERSE LENGTH=294;AT1G53580.1 | Symbols: GLX2-3, ETHE1, GLY3 | glyoxalase II 3 | chr1:19991542-19993250 REVERSE LENGTH=294	7	7	40.8	40.8	32.358	0	198.69	99	NA	NA	NA	83633000	144610000	78131000	136190000	153970000	135510000	153440000	153050000	46629000	123140000	160610000	188040000	158390000	181840000	133110000	Q9C8L4	294	7.5
AT1G54410	AT1G54410.1	AT1G54410.1 | Symbols: | dehydrin family protein | chr1:20310305-20310601 REVERSE LENGTH=98	2	2	22.4	22.4	10.796	0	3.2189	33	NA	NA	NA	NA	NA	NA	616180000	726490000	511200000	995940000	959810000	NA	290640000	357990000	277570000	104420000	94239000	171650000	Q9SLJ2	98	100
AT1G54860	AT1G54860.1	AT1G54860.1 | Symbols: | Glycoprotein membrane precursor GPI-anchored | chr1:20457522-20458434 REVERSE LENGTH=200	5	5	27.5	27.5	21.569	0	323.31	704	7683800000	9361600000	4477600000	11700000000	10000000000	11200000000	11200000000	11600000000	9625100000	8996100000	9152700000	14500000000	8362700000	8751200000	9343400000	12400000000	11400000000	10800000000	NA	NA	NA
AT1G54870	AT1G54870.1	AT1G54870.1 | Symbols: | NAD(P)-binding Rossmann-fold superfamily protein | chr1:20459011-20460417 FORWARD LENGTH=335	17	17	61.8	61.8	36.764	0	323.31	258	1809100000	1033800000	3331400000	1351800000	1353400000	2233600000	476720000	365230000	397910000	54342000	63391000	183000000	NA	NA	NA	NA	NA	NA	Q9FZ42	288	12.8
AT1G55260	AT1G55260.2;AT1G55260.1	AT1G55260.2 | Symbols: | Bifunctional inhibitor/lipid-transfer protein/seed storage 2S albumin superfamily protein | chr1:20614663-20616158 FORWARD LENGTH=224;AT1G55260.1 | Symbols: | Bifunctional inhibitor/lipid-transfer protein/seed storage 2S albumin	5	5	21.9	21.9	25.034	0	99.702	104	NA	NA	NA	NA	NA	NA	NA	78858000	56376000	281930000	198530000	385490000	389500000	369130000	348590000	549840000	574990000	478370000	NA	NA	NA
AT1G55265	AT1G55265.1	AT1G55265.1 | Symbols: | Protein of unknown function, DUF538 | chr1:20617326-20617853 FORWARD LENGTH=175	2	2	10.3	10.3	19.137	0.003647	2.1387	16	NA	NA	NA	24617000	30287000	45751000	44167000	NA	34370000	25740000	21705000	NA	NA	NA	NA	30089000	28414000	30200000	NA	NA	NA
AT1G55480	AT1G55480.1	AT1G55480.1 | Symbols: ZKT | protein containing PDZ domain, a K-box domain, and a TPR region | chr1:20713822-20715351 FORWARD LENGTH=335	6	6	26.3	26.3	37.41	0	46.836	33	NA	NA	NA	NA	NA	NA	NA	NA	NA	85632000	53560000	62408000	44287000	NA	NA	71587000	72303000	66302000	Q94BS2	335	28.4
AT1G55490	AT1G55490.2;AT1G55490.1	AT1G55490.2 | Symbols: CPN60B, LEN1 | chaperonin 60 beta | chr1:20715717-20718673 REVERSE LENGTH=600;AT1G55490.1 | Symbols: CPN60B, LEN1 | chaperonin 60 beta | chr1:20715717-20718673 REVERSE LENGTH=600	33	7	58.5	10.3	63.808	0	323.31	862	NA	NA	NA	1289300000	1509900000	1732500000	1773100000	1950000000	1432900000	2617900000	2580000000	2461900000	3096500000	3343500000	2944100000	4153800000	3871100000	3882400000	P21240	600	12.7
AT1G55805	AT1G55805.1	AT1G55805.1 | Symbols: | BolA-like family protein | chr1:20858956-20859438 REVERSE LENGTH=160	2	2	11.2	11.2	17.672	0	20.084	27	NA	NA	NA	NA	NA	NA	NA	NA	NA	91791000	101850000	NA	NA	83205000	NA	NA	99668000	70016000	Q682I1	160	58.8
AT1G56070	AT1G56070.1	AT1G56070.1 | Symbols: LOS1 | Ribosomal protein S5/Elongation factor G/III/V family protein | chr1:20968245-20971077 REVERSE LENGTH=843	18	11	21	13.9	93.89	0	149.02	181	NA	NA	480040000	353410000	639220000	291180000	536950000	609500000	516140000	392520000	446460000	277670000	788500000	332730000	328520000	310100000	328640000	428150000	Q9ASR1	843	0
AT1G56340	AT1G56340.1;AT1G56340.2	AT1G56340.1 | Symbols: CRT1, CRT1a, AtCRT1a | calreticulin 1a | chr1:21090059-21092630 REVERSE LENGTH=425;AT1G56340.2 | Symbols: CRT1, CRT1a, AtCRT1a | calreticulin 1a | chr1:21090022-21092630 REVERSE LENGTH=424	21	12	55.1	40.2	48.527	0	323.31	541	181690000	136130000	219310000	1025800000	2200000000	1149400000	2706200000	2779500000	2807900000	3485100000	3308800000	1140000000	2630500000	2951300000	2690000000	755450000	902550000	1208700000	O04151	425	45.9
AT1G56500	AT1G56500.1	AT1G56500.1 | Symbols: | haloacid dehalogenase-like hydrolase family protein | chr1:21159775-21167092 FORWARD LENGTH=1055	2	2	1.6	1.6	114.4	0.0077629	1.9257	10	NA	NA	NA	NA	NA	NA	NA	NA	NA	NA	NA	NA	NA	NA	NA	22820000	32900000	31508000	NA	NA	NA
AT1G57720	AT1G57720.2;AT1G57720.1	AT1G57720.2 | Symbols: | Translation elongation factor EF1B, gamma chain | chr1:21377873-21380114 FORWARD LENGTH=413;AT1G57720.1 | Symbols: | Translation elongation factor EF1B, gamma chain | chr1:21377873-21380114 FORWARD LENGTH=413	2	2	7.3	7.3	46.4	0	25.758	14	NA	NA	NA	NA	NA	NA	NA	NA	20327000	NA	NA	37566000	43853000	NA	19823000	NA	NA	NA	Q9FVT2	413	14.8
AT1G60680	AT1G60680.1;AT1G60730.2;AT1G60750.1;AT1G60730.1;AT1G60710.1;AT1G60690.1;AT1G60730.3	AT1G60680.1 | Symbols: | NAD(P)-linked oxidoreductase superfamily protein | chr1:22347824-22349236 REVERSE LENGTH=346;AT1G60730.2 | Symbols: | NAD(P)-linked oxidoreductase superfamily protein | chr1:22358613-22360082 REVERSE LENGTH=251;AT1G60750.1 | Symb	4	4	15.9	15.9	38.268	0	13.159	10	56094000	56622000	56448000	NA	NA	NA	NA	NA	NA	NA	NA	NA	NA	NA	NA	NA	NA	NA	Q84M96	346	12.1
AT1G60950	AT1G60950.1	AT1G60950.1 | Symbols: FED A, ATFD2 | 2Fe-2S ferredoxin-like superfamily protein | chr1:22444565-22445011 FORWARD LENGTH=148	2	2	50.7	50.7	15.539	0	190.64	324	NA	NA	NA	NA	NA	NA	NA	NA	NA	173440000	199590000	76242000	378680000	302220000	214960000	267750000	362070000	299150000	P16972	148	29.7
AT1G61150	AT1G61150.5;AT1G61150.6;AT1G61150.4;AT1G61150.2;AT1G61150.1;AT1G61150.7;AT1G61150.3	AT1G61150.5 | Symbols: | LisH and RanBPM domains containing protein | chr1:22543122-22544355 FORWARD LENGTH=220;AT1G61150.6 | Symbols: | LisH and RanBPM domains containing protein | chr1:22542979-22544355 FORWARD LENGTH=226;AT1G61150.4 | Symbols: | LisH	6	6	39.1	39.1	25.042	0	43.796	13	NA	NA	NA	NA	NA	NA	NA	NA	NA	44904000	30930000	NA	NA	NA	NA	NA	NA	NA	Q84WK5	243	23
AT1G61570	AT1G61570.1	AT1G61570.1 | Symbols: TIM13 | translocase of the inner mitochondrial membrane 13 | chr1:22718897-22719473 REVERSE LENGTH=87	2	2	40.2	40.2	9.4116	0	13.844	55	57794000	53723000	74744000	55412000	41892000	NA	NA	57389000	NA	NA	NA	49723000	48031000	50724000	NA	46287000	47411000	NA	Q9XH48	87	36.8
AT1G61900	AT1G61900.2;AT1G61900.1;AT1G61900.3	AT1G61900.2 | Symbols: | unknown protein; FUNCTIONS IN: molecular_function unknown; INVOLVED IN: biological_process unknown; LOCATED IN: anchored to plasma membrane, plasma membrane, anchored to membrane; EXPRESSED IN: 23 plant structures; EXPRESSED DURIN	7	7	27.8	27.8	45.091	0	97.207	69	NA	NA	NA	NA	NA	NA	NA	NA	NA	97611000	106330000	145860000	122420000	139370000	117720000	165650000	162080000	165180000	Q8GUI4	433	3.2
AT1G62290	AT1G62290.2;AT1G62290.1	AT1G62290.2 | Symbols: | Saposin-like aspartyl protease family protein | chr1:23010107-23012681 REVERSE LENGTH=513;AT1G62290.1 | Symbols: | Saposin-like aspartyl protease family protein | chr1:23010107-23012681 REVERSE LENGTH=513	7	5	19.9	15	55.748	0	151.6	141	193990000	113570000	232370000	282780000	450200000	126920000	235500000	221430000	279070000	196010000	274460000	75621000	NA	84345000	89812000	NA	NA	NA	Q8VYL3	513	0
AT1G62380	AT1G62380.1	AT1G62380.1 | Symbols: ACO2, ATACO2 | ACC oxidase 2 | chr1:23082340-23084068 FORWARD LENGTH=320	8	7	34.1	31.6	36.183	0	30.622	76	NA	NA	NA	NA	NA	NA	32194000	57097000	20420000	188020000	304900000	56778000	274090000	362970000	362840000	300040000	445030000	348750000	Q41931	320	1.9
AT1G62480	AT1G62480.1	AT1G62480.1 | Symbols: | Vacuolar calcium-binding protein-related | chr1:23128799-23129548 FORWARD LENGTH=152	14	14	97.4	97.4	16.628	0	323.31	806	NA	NA	NA	955160000	1028100000	1839900000	3303900000	3523400000	4573300000	6615600000	6153200000	8044800000	5559300000	6762800000	6688900000	6643300000	6851600000	6306700000	NA	NA	NA
AT1G62660	AT1G62660.1	AT1G62660.1 | Symbols: | Glycosyl hydrolases family 32 protein | chr1:23199949-23203515 FORWARD LENGTH=648	5	5	9.7	9.7	72.227	0	18.745	54	NA	NA	NA	NA	NA	NA	NA	37421000	NA	62887000	73854000	45564000	107910000	98995000	92274000	172230000	167400000	159150000	Q43348	648	7.9
AT1G62740	AT1G62740.1	AT1G62740.1 | Symbols: Hop2 | stress-inducible protein, putative | chr1:23231026-23233380 FORWARD LENGTH=571	19	14	36.4	31.2	64.519	0	204.47	242	152880000	104140000	241700000	474450000	502950000	612090000	416380000	459970000	488060000	340600000	364720000	376360000	230730000	263400000	333840000	303050000	327240000	287290000	Q5XEP2	571	33.1
AT1G62820	AT1G62820.1	AT1G62820.1 | Symbols: | Calcium-binding EF-hand family protein | chr1:23263822-23264268 REVERSE LENGTH=148	8	3	52.7	26.4	16.579	0	163.1	95	132600000	129560000	146210000	219920000	200760000	262860000	269680000	287270000	313560000	241980000	268150000	370420000	243710000	253800000	246120000	239470000	324320000	232380000	Q8VZ50	148	9.5
AT1G63610	AT1G63610.1;AT1G63610.2	AT1G63610.1 | Symbols: | unknown protein; FUNCTIONS IN: molecular_function unknown; INVOLVED IN: biological_process unknown; LOCATED IN: chloroplast; EXPRESSED IN: 22 plant structures; EXPRESSED DURING: 13 growth stages; BEST Arabidopsis thaliana protein	4	4	14.4	14.4	37.955	0	8.3804	8	NA	NA	NA	NA	NA	NA	NA	NA	NA	NA	NA	NA	NA	NA	NA	23284000	NA	24742000	NA	NA	NA
AT1G63940	AT1G63940.4;AT1G63940.1;AT1G63940.2;AT1G63940.3	AT1G63940.4 | Symbols: MDAR6 | monodehydroascorbate reductase 6 | chr1:23730206-23733534 FORWARD LENGTH=482;AT1G63940.1 | Symbols: MDAR6 | monodehydroascorbate reductase 6 | chr1:23730206-23733534 FORWARD LENGTH=486;AT1G63940.2 | Symbols: MDAR6 | monodehyd	9	9	27.2	27.2	52.115	0	19.374	23	NA	NA	NA	NA	NA	NA	NA	NA	NA	NA	NA	NA	111650000	NA	NA	40039000	29522000	60083000	P92947	493	3.7
AT1G64640	AT1G64640.1	AT1G64640.1 | Symbols: ENODL8, AtENODL8 | early nodulin-like protein 8 | chr1:24022482-24023151 REVERSE LENGTH=191	2	2	20.4	20.4	20.251	0	13.18	39	NA	NA	NA	NA	NA	NA	38084000	NA	65158000	72260000	59185000	131400000	59006000	79755000	66744000	67353000	87267000	70216000	NA	NA	NA
AT1G64750	AT1G64750.2;AT1G64750.1;AT1G64750.3	AT1G64750.2 | Symbols: ATDSS1(I), DSS1(I) | deletion of SUV3 suppressor 1(I) | chr1:24052787-24053712 REVERSE LENGTH=74;AT1G64750.1 | Symbols: ATDSS1(I), DSS1(I) | deletion of SUV3 suppressor 1(I) | chr1:24052787-24053712 REVERSE LENGTH=74;AT1G64750.3 | Sy	3	3	50	50	8.8593	0	323.31	13	NA	NA	NA	102600000	96545000	108580000	NA	NA	NA	NA	NA	NA	NA	NA	NA	NA	NA	NA	Q9XIR8	74	100
AT1G65010	AT1G65010.1	AT1G65010.1 | Symbols: | Plant protein of unknown function (DUF827) | chr1:24149543-24154024 FORWARD LENGTH=1345	46	46	38.4	38.4	152.7	0	323.31	434	NA	NA	NA	35857000	31007000	105070000	562510000	616660000	619390000	822720000	770970000	930430000	697960000	625110000	809420000	659730000	860080000	785380000	NA	NA	NA
AT1G65090	AT1G65090.1;AT1G65090.2;AT1G65090.3	AT1G65090.1 | Symbols: | unknown protein; BEST Arabidopsis thaliana protein match is: unknown protein (TAIR:AT5G36100.1); Has 1435 Blast hits to 1033 proteins in 192 species: Archae - 0; Bacteria - 61; Metazoa - 511; Fungi - 123; Plants - 100; Viruses - 4	7	7	33.3	33.3	26.748	0	243.21	34	NA	NA	NA	228160000	152400000	237760000	107550000	NA	182170000	85204000	106740000	226290000	NA	NA	NA	NA	NA	NA	NA	NA	NA
AT1G65260	AT1G65260.1	AT1G65260.1 | Symbols: PTAC4, VIPP1 | plastid transcriptionally active 4 | chr1:24236329-24240428 FORWARD LENGTH=330	5	5	14.8	14.8	36.392	0	22.244	33	NA	NA	NA	NA	NA	NA	NA	NA	NA	41389000	44472000	63680000	59816000	67308000	51049000	80211000	62127000	55828000	O80796	330	47
AT1G65290	AT1G65290.1	AT1G65290.1 | Symbols: mtACP2 | mitochondrial acyl carrier protein 2 | chr1:24249088-24250366 REVERSE LENGTH=126	2	2	23.8	23.8	14.167	0	3.5343	17	NA	NA	NA	NA	NA	NA	NA	NA	NA	NA	NA	NA	NA	NA	NA	59549000	55888000	39305000	O80800	126	0
AT1G65700	AT1G65700.2;AT1G65700.1;AT1G65700.3	AT1G65700.2 | Symbols: | Small nuclear ribonucleoprotein family protein | chr1:24434463-24435870 REVERSE LENGTH=98;AT1G65700.1 | Symbols: | Small nuclear ribonucleoprotein family protein | chr1:24434463-24435870 REVERSE LENGTH=98;AT1G65700.3 | Symbols:	2	2	38.8	38.8	10.706	0	12.074	23	NA	NA	NA	NA	30068000	NA	27990000	NA	30256000	NA	25718000	NA	16662000	22479000	NA	36671000	27364000	NA	Q8VYI0	98	4.1
AT1G65930	AT1G65930.1	AT1G65930.1 | Symbols: cICDH | cytosolic NADP+-dependent isocitrate dehydrogenase | chr1:24539088-24541861 FORWARD LENGTH=410	9	9	26.6	26.6	45.746	0	25.889	22	NA	NA	15132000	NA	NA	NA	NA	NA	NA	NA	NA	NA	149420000	NA	NA	18517000	13470000	31953000	Q9SRZ6	410	0
AT1G65980	AT1G65980.1	AT1G65980.1 | Symbols: TPX1 | thioredoxin-dependent peroxidase 1 | chr1:24559524-24560753 REVERSE LENGTH=162	8	6	70.4	56.8	17.428	0	235.83	414	607870000	725580000	848820000	1011600000	1869800000	852590000	847500000	775080000	882330000	1088700000	1186100000	388670000	524480000	835720000	556000000	463970000	679640000	392480000	Q9XEX2	162	0
AT1G66070	AT1G66070.2;AT1G66070.1	AT1G66070.2 | Symbols: | Translation initiation factor eIF3 subunit | chr1:24596194-24597520 REVERSE LENGTH=226;AT1G66070.1 | Symbols: | Translation initiation factor eIF3 subunit | chr1:24596194-24597520 REVERSE LENGTH=226	5	5	23.9	23.9	25.507	0	17.443	52	NA	NA	NA	62896000	71084000	56387000	91041000	97417000	84985000	88494000	98312000	108580000	77300000	99267000	81615000	89718000	NA	91982000	NA	NA	NA
AT1G66240	AT1G66240.1;AT1G66240.2	AT1G66240.1 | Symbols: ATX1, ATATX1 | homolog of anti-oxidant 1 | chr1:24686445-24687327 REVERSE LENGTH=106;AT1G66240.2 | Symbols: ATX1, ATATX1 | homolog of anti-oxidant 1 | chr1:24686445-24686832 REVERSE LENGTH=66	6	6	42.5	42.5	11.43	0	323.31	203	530270000	620020000	712840000	440100000	453460000	278990000	688560000	898950000	807470000	635280000	1009100000	466390000	436810000	905300000	728770000	813680000	665770000	794590000	Q94BT9	76	23.7
AT1G66680	AT1G66680.1	AT1G66680.1 | Symbols: AR401 | S-adenosyl-L-methionine-dependent methyltransferases superfamily protein | chr1:24866352-24868888 REVERSE LENGTH=358	2	2	6.7	6.7	39.229	0	35.223	21	NA	NA	NA	NA	NA	NA	64408000	53576000	53226000	NA	NA	NA	NA	NA	NA	NA	NA	NA	NA	NA	NA
AT1G67090	AT1G67090.1	AT1G67090.1 | Symbols: RBCS1A | ribulose bisphosphate carboxylase small chain 1A | chr1:25048465-25049249 REVERSE LENGTH=180	9	6	52.2	31.1	20.216	0	36.66	106	NA	NA	42973000	NA	NA	NA	30595000	39229000	NA	90351000	115280000	92978000	1026200000	196790000	212960000	440110000	299140000	579060000	P10795	180	5
AT1G67230	AT1G67230.1	AT1G67230.1 | Symbols: LINC1 | little nuclei1 | chr1:25151561-25156032 REVERSE LENGTH=1132	6	6	6	6	129.09	0	78.682	31	NA	NA	NA	NA	58981000	NA	52944000	78674000	65486000	60575000	57181000	66246000	NA	NA	NA	NA	NA	NA	NA	NA	NA
AT1G69295	AT1G69295.1	AT1G69295.1 | Symbols: PDCB4 | plasmodesmata callose-binding protein 4 | chr1:26050492-26051843 REVERSE LENGTH=222	3	3	22.5	22.5	22.076	0	105.46	26	237430000	183070000	134340000	106680000	103920000	NA	NA	NA	NA	88272000	88383000	165500000	NA	NA	NA	88961000	152400000	124990000	Q93V72	222	49.1
AT1G69410	AT1G69410.1	AT1G69410.1 | Symbols: ATELF5A-3, ELF5A-3 | eukaryotic elongation factor 5A-3 | chr1:26089301-26090194 FORWARD LENGTH=158	10	7	67.1	50	17.207	0	148.26	202	630750000	745050000	792990000	819490000	814440000	493270000	402370000	503000000	488400000	458700000	367800000	238320000	253410000	259360000	220120000	226700000	248080000	227690000	Q9C505	158	17.1
AT1G69510	AT1G69510.3;AT1G69510.2;AT1G69510.1	AT1G69510.3 | Symbols: | cAMP-regulated phosphoprotein 19-related protein | chr1:26126779-26127725 FORWARD LENGTH=137;AT1G69510.2 | Symbols: | cAMP-regulated phosphoprotein 19-related protein | chr1:26126779-26127725 FORWARD LENGTH=137;AT1G69510.1 | Symb	4	3	30.7	24.1	15.096	0	33.114	151	100590000	89828000	NA	456030000	364040000	492300000	439250000	525060000	518930000	410830000	365220000	583510000	336960000	380220000	306630000	342200000	269760000	323460000	NA	NA	NA
AT1G70600	AT1G70600.1;AT1G23290.1	AT1G70600.1 | Symbols: | Ribosomal protein L18e/L15 superfamily protein | chr1:26621168-26621608 REVERSE LENGTH=146;AT1G23290.1 | Symbols: RPL27A, RPL27AB | Ribosomal protein L18e/L15 superfamily protein | chr1:8263007-8263447 FORWARD LENGTH=146	4	4	30.8	30.8	16.455	0	5.8386	16	NA	NA	NA	NA	NA	NA	41960000	31826000	21550000	NA	24270000	29740000	NA	NA	NA	31498000	NA	46557000	P49637	146	35.6
AT1G70830	AT1G70830.5;AT1G70830.3;AT1G70830.1;AT1G70830.2;AT1G70830.4	AT1G70830.5 | Symbols: MLP28 | MLP-like protein 28 | chr1:26710203-26711395 REVERSE LENGTH=173;AT1G70830.3 | Symbols: MLP28 | MLP-like protein 28 | chr1:26710203-26711395 REVERSE LENGTH=201;AT1G70830.1 | Symbols: MLP28 | MLP-like protein 28 | chr1:26710203	4	3	19.7	13.9	19.34	0.008427	1.8817	7	NA	NA	NA	NA	NA	NA	NA	NA	NA	NA	NA	NA	88830000	91725000	NA	NA	NA	NA	Q9SSK9	335	7.2
AT1G70840	AT1G70840.1	AT1G70840.1 | Symbols: MLP31 | MLP-like protein 31 | chr1:26713170-26714014 REVERSE LENGTH=171	4	3	25.1	18.7	19.138	0	4.2194	14	74618000	54805000	127220000	NA	98258000	NA	NA	NA	NA	NA	NA	NA	NA	NA	NA	NA	NA	NA	Q941R6	171	6.4
AT1G70880	AT1G70880.1	AT1G70880.1 | Symbols: | Polyketide cyclase/dehydrase and lipid transport superfamily protein | chr1:26723086-26723717 REVERSE LENGTH=159	2	2	16.4	16.4	17.861	0	6.0611	13	NA	NA	NA	NA	NA	NA	NA	NA	NA	NA	NA	NA	NA	NA	NA	31991000	25653000	25650000	NA	NA	NA
AT1G70890	AT1G70890.1	AT1G70890.1 | Symbols: MLP43 | MLP-like protein 43 | chr1:26725912-26726489 REVERSE LENGTH=158	5	3	29.1	17.7	17.889	0	10.852	40	NA	NA	NA	NA	NA	NA	NA	NA	NA	NA	NA	NA	151890000	149000000	163120000	255240000	224190000	238710000	Q9SSK5	158	4.4
AT1G71730	AT1G71730.1	AT1G71730.1 | Symbols: | unknown protein; Has 52 Blast hits to 52 proteins in 24 species: Archae - 0; Bacteria - 0; Metazoa - 4; Fungi - 0; Plants - 41; Viruses - 0; Other Eukaryotes - 7 (source: NCBI BLink). | chr1:26986298-26986831 REVERSE LENGTH=177	2	2	11.9	11.9	19.578	0	25.062	29	NA	NA	NA	NA	63275000	56437000	72811000	56361000	74328000	60161000	60076000	45817000	44707000	66305000	60965000	59937000	55969000	46425000	NA	NA	NA
AT1G71950	AT1G71950.1	AT1G71950.1 | Symbols: | Proteinase inhibitor, propeptide | chr1:27080453-27081573 REVERSE LENGTH=136	5	5	41.2	41.2	14.852	0	62.589	180	461760000	363970000	502110000	651610000	479740000	757670000	516570000	576290000	463980000	433680000	484400000	639840000	355270000	487470000	396380000	454120000	410520000	479030000	NA	NA	NA
AT1G72150	AT1G72150.1	AT1G72150.1 | Symbols: PATL1 | PATELLIN 1 | chr1:27148558-27150652 FORWARD LENGTH=573	11	10	20.9	19.2	64.046	0	21.6	114	NA	NA	NA	NA	NA	62829000	98745000	102800000	117890000	256710000	229040000	246010000	368910000	365810000	389760000	571140000	512740000	621300000	Q56WK6	573	40.3
AT1G72230	AT1G72230.1	AT1G72230.1 | Symbols: | Cupredoxin superfamily protein | chr1:27188287-27189093 FORWARD LENGTH=181	3	3	28.2	28.2	18.371	0	33.814	15	NA	NA	NA	NA	NA	NA	NA	NA	NA	NA	NA	NA	53208000	42345000	46322000	NA	58438000	57799000	NA	NA	NA
AT1G72370	AT1G72370.2;AT1G72370.1	AT1G72370.2 | Symbols: P40, AP40, RP40, RPSAA | 40s ribosomal protein SA | chr1:27243148-27244842 REVERSE LENGTH=294;AT1G72370.1 | Symbols: P40, AP40, RP40, RPSAA | 40s ribosomal protein SA | chr1:27243148-27244842 REVERSE LENGTH=298	4	4	18.4	18.4	31.981	0	57.892	40	NA	NA	NA	NA	NA	NA	65794000	39268000	51772000	38274000	42165000	43695000	142070000	44875000	64669000	88624000	66260000	105900000	Q08682	298	38.6
AT1G73230	AT1G73230.1	AT1G73230.1 | Symbols: | Nascent polypeptide-associated complex NAC | chr1:27540506-27541364 REVERSE LENGTH=165	11	8	70.9	60	18.004	0	323.31	660	786620000	932660000	1012900000	2281900000	2048100000	1383200000	2369200000	2464800000	2372300000	1656500000	1758500000	2323600000	1367400000	1438600000	1170000000	1250000000	1349300000	1060000000	Q9CAT7	165	73.9
AT1G73260	AT1G73260.1	AT1G73260.1 | Symbols: ATKTI1, KTI1 | kunitz trypsin inhibitor 1 | chr1:27547410-27548057 REVERSE LENGTH=215	4	3	30.2	21.4	23.793	0	8.7863	14	NA	NA	NA	NA	NA	NA	NA	NA	NA	61018000	NA	NA	NA	NA	NA	82495000	72325000	81079000	Q8RXD5	215	0
AT1G74050	AT1G74050.1;AT1G74060.1	AT1G74050.1 | Symbols: | Ribosomal protein L6 family protein | chr1:27847256-27848680 REVERSE LENGTH=233;AT1G74060.1 | Symbols: | Ribosomal protein L6 family protein | chr1:27850033-27851299 REVERSE LENGTH=233	7	3	30.5	10.7	26.106	0	20.821	65	NA	NA	NA	NA	NA	NA	88542000	102120000	88439000	68509000	77552000	223070000	182150000	58256000	87876000	98787000	63898000	104690000	Q9C9C5	233	45.1
AT1G74230	AT1G74230.1	AT1G74230.1 | Symbols: GR-RBP5 | glycine-rich RNA-binding protein 5 | chr1:27915346-27916857 FORWARD LENGTH=289	6	6	17	17	28.728	0	75.825	77	NA	NA	NA	NA	NA	NA	220300000	253140000	275890000	244880000	248880000	240870000	232730000	240960000	267570000	188230000	215500000	198470000	Q9C909	289	65.7
AT1G74310	AT1G74310.1	AT1G74310.1 | Symbols: ATHSP101, HSP101, HOT1 | heat shock protein 101 | chr1:27936715-27939862 REVERSE LENGTH=911	2	2	3.5	3.5	101.29	0	3.4896	7	NA	NA	NA	NA	39685000	53424000	NA	NA	NA	NA	NA	NA	NA	NA	NA	NA	NA	NA	P42730	911	18.9
AT1G74560	AT1G74560.1;AT1G74560.3;AT1G74560.2	AT1G74560.1 | Symbols: NRP1 | NAP1-related protein 1 | chr1:28017815-28019900 REVERSE LENGTH=256;AT1G74560.3 | Symbols: NRP1 | NAP1-related protein 1 | chr1:28017763-28019900 REVERSE LENGTH=264;AT1G74560.2 | Symbols: NRP1 | NAP1-related protein 1 | chr1:28	8	4	40.6	24.6	29.416	0	61.113	101	NA	NA	NA	NA	326210000	173690000	169490000	164680000	133660000	205500000	272420000	72468000	113220000	224230000	263990000	33694000	85392000	75576000	Q9CA59	256	54.7
AT1G74790	AT1G74790.1	AT1G74790.1 | Symbols: | catalytics | chr1:28098912-28101673 FORWARD LENGTH=695	12	11	19.9	18.6	75.224	0	86.334	180	NA	NA	NA	197820000	222770000	205560000	271820000	269000000	256720000	312970000	297810000	511240000	364160000	410080000	408240000	468360000	485220000	523970000	Q9SSG3	695	4.7
AT1G75830	AT1G75830.1	AT1G75830.1 | Symbols: LCR67, PDF1.1 | low-molecular-weight cysteine-rich 67 | chr1:28472405-28472754 FORWARD LENGTH=80	4	4	52.5	52.5	8.7092	0	212.85	264	36700000000	37100000000	32800000000	6130000000	3575200000	8300000000	1982700000	3114900000	2767900000	1156300000	1646400000	1213100000	720090000	730650000	512230000	646470000	809780000	582650000	P30224	80	0
AT1G75950	AT1G75950.1	AT1G75950.1 | Symbols: SKP1, ASK1, ATSKP1, SKP1A, UIP1 | S phase kinase-associated protein 1 | chr1:28516715-28517454 FORWARD LENGTH=160	6	3	43.8	30.6	17.857	0	128.17	197	NA	NA	175970000	349410000	545310000	298680000	468980000	503220000	619670000	468550000	471240000	217680000	360550000	385590000	390610000	275810000	356080000	285380000	Q39255	160	18.1
AT1G76030	AT1G76030.1;AT1G20260.1;AT4G38510.4;AT4G38510.3;AT4G38510.2;AT4G38510.1;AT4G38510.5	AT1G76030.1 | Symbols: | ATPase, V1 complex, subunit B protein | chr1:28534134-28536916 FORWARD LENGTH=486;AT1G20260.1 | Symbols: | ATPase, V1 complex, subunit B protein | chr1:7016971-7020290 FORWARD LENGTH=487;AT4G38510.4 | Symbols: | ATPase, V1 compl	7	7	15.8	15.8	54.107	0	20.311	35	NA	NA	NA	NA	NA	NA	33320000	50739000	30648000	51712000	45042000	34064000	55051000	57725000	35715000	58098000	44773000	43979000	P11574	486	1.9
AT1G76080	AT1G76080.1	AT1G76080.1 | Symbols: ATCDSP32, CDSP32 | chloroplastic drought-induced stress protein of 32 kD | chr1:28548063-28549348 REVERSE LENGTH=302	2	2	6.6	6.6	33.684	0.0036443	2.1244	10	NA	NA	NA	NA	NA	NA	NA	NA	NA	NA	NA	NA	31892000	23896000	24899000	NA	NA	32256000	Q9SGS4	302	23.2
AT1G76180	AT1G76180.2;AT1G76180.1	AT1G76180.2 | Symbols: ERD14 | Dehydrin family protein | chr1:28587013-28587657 REVERSE LENGTH=185;AT1G76180.1 | Symbols: ERD14 | Dehydrin family protein | chr1:28587013-28587657 REVERSE LENGTH=185	15	13	68.6	68.1	20.786	0	323.31	365	NA	NA	NA	233080000	291850000	604440000	1331400000	1615400000	1638300000	2320000000	2252600000	2150700000	1971200000	1917900000	1665500000	877950000	820560000	1406100000	P42763	185	100
AT1G76810	AT1G76810.1	AT1G76810.1 | Symbols: | eukaryotic translation initiation factor 2 (eIF-2) family protein | chr1:28831366-28836310 REVERSE LENGTH=1294	12	12	11.7	11.7	142.11	0	29.142	54	NA	NA	NA	NA	NA	66684000	91170000	94495000	94979000	81846000	96429000	125830000	93162000	88343000	88225000	88968000	87641000	81436000	NA	NA	NA
AT1G77330	AT1G77330.1	AT1G77330.1 | Symbols: | 2-oxoglutarate (2OG) and Fe(II)-dependent oxygenase superfamily protein | chr1:29063215-29064447 REVERSE LENGTH=307	3	3	10.7	10.7	34.946	0	5.0488	13	NA	NA	NA	NA	NA	NA	44262000	34767000	NA	38127000	47805000	NA	NA	NA	NA	NA	NA	NA	Q0WPW4	307	5.5
AT1G77510	AT1G77510.1	AT1G77510.1 | Symbols: ATPDIL1-2, PDI6, ATPDI6, PDIL1-2 | PDI-like 1-2 | chr1:29126742-29129433 FORWARD LENGTH=508	29	23	57.1	47.8	56.364	0	164.64	615	209590000	91742000	444560000	699010000	1583100000	1250800000	1668700000	1630900000	1510900000	2121100000	2029200000	661610000	1233300000	1471600000	1211600000	1009200000	1369500000	1066400000	Q9SRG3	508	9.8
AT1G77630	AT1G77630.1	AT1G77630.1 | Symbols: | Peptidoglycan-binding LysM domain-containing protein | chr1:29173726-29175387 FORWARD LENGTH=423	5	2	10.6	6.6	44.151	0	7.6897	8	NA	NA	NA	NA	NA	NA	NA	NA	NA	28092000	NA	30328000	NA	NA	NA	31649000	39778000	34874000	Q6NPN4	423	11.1
AT1G77710	AT1G77710.1	AT1G77710.1 | Symbols: | CONTAINS InterPro DOMAIN/s: Ubiquitin-like, Ufm1 (InterPro:IPR005375); Has 244 Blast hits to 244 proteins in 106 species: Archae - 0; Bacteria - 0; Metazoa - 149; Fungi - 0; Plants - 47; Viruses - 0; Other Eukaryotes - 48 (source:	4	4	59.1	59.1	9.9284	0	18.707	90	135670000	181190000	153430000	126140000	NA	107520000	134660000	87165000	125080000	70525000	129570000	108160000	106220000	110580000	96696000	101890000	98484000	97943000	Q9CA23	93	4.3
AT1G78150	AT1G78150.2;AT1G78150.1;AT1G78150.3	AT1G78150.2 | Symbols: | unknown protein; BEST Arabidopsis thaliana protein match is: unknown protein (TAIR:AT1G35780.1); Has 35333 Blast hits to 34131 proteins in 2444 species: Archae - 798; Bacteria - 22429; Metazoa - 974; Fungi - 991; Plants - 531; Vir	11	9	43.8	36.5	29.679	0	186.63	255	NA	NA	NA	284630000	290370000	311370000	321470000	323110000	356170000	365550000	344960000	463670000	329020000	378510000	437980000	388150000	380520000	362680000	NA	NA	NA
AT1G78380	AT1G78380.1	AT1G78380.1 | Symbols: ATGSTU19, GST8, GSTU19 | glutathione S-transferase TAU 19 | chr1:29486659-29487819 REVERSE LENGTH=219	4	4	15.1	15.1	25.65	0	12.457	27	NA	NA	NA	NA	NA	NA	NA	NA	NA	NA	NA	23977000	134360000	24497000	NA	74854000	34215000	94265000	Q9ZRW8	219	0
AT1G78830	AT1G78830.1	AT1G78830.1 | Symbols: | Curculin-like (mannose-binding) lectin family protein | chr1:29637141-29638508 REVERSE LENGTH=455	3	3	8.8	8.8	50.342	0	7.9481	14	NA	NA	NA	NA	NA	NA	NA	NA	NA	NA	NA	NA	NA	35333000	36631000	56518000	45216000	50785000	Q9ZVA2	455	0
AT1G79210	AT1G79210.3;AT1G79210.2;AT1G79210.1;AT1G16470.2;AT1G16470.1	AT1G79210.3 | Symbols: | N-terminal nucleophile aminohydrolases (Ntn hydrolases) superfamily protein | chr1:29796286-29798240 REVERSE LENGTH=235;AT1G79210.2 | Symbols: | N-terminal nucleophile aminohydrolases (Ntn hydrolases) superfamily protein | chr1:2	7	7	32.3	32.3	25.733	0	9.6379	36	NA	NA	NA	NA	56266000	36640000	NA	NA	NA	NA	NA	NA	NA	NA	NA	42179000	33134000	46396000	Q8L4A7	235	0
AT1G79340	AT1G79340.1	AT1G79340.1 | Symbols: AtMC4, MC4 | metacaspase 4 | chr1:29842849-29844368 FORWARD LENGTH=418	16	16	46.2	46.2	45.483	0	323.31	377	NA	NA	30967000	247600000	530030000	298400000	987920000	976420000	861580000	1132700000	1186400000	543550000	842810000	1147700000	936930000	957660000	1042400000	902820000	O64517	418	30.9
AT1G79550	AT1G79550.2;AT1G79550.1	AT1G79550.2 | Symbols: PGK | phosphoglycerate kinase | chr1:29924347-29926295 REVERSE LENGTH=401;AT1G79550.1 | Symbols: PGK | phosphoglycerate kinase | chr1:29924347-29926295 REVERSE LENGTH=401	13	9	42.1	28.4	42.131	0	101.73	105	NA	NA	171970000	117380000	100890000	370500000	135930000	154170000	112150000	89886000	95353000	222390000	240440000	116710000	98918000	107010000	89179000	136400000	Q9SAJ4	401	2.7
AT1G79650	AT1G79650.2;AT1G79650.1;AT1G79650.4;AT1G79650.3	AT1G79650.2 | Symbols: RAD23, RAD23B | Rad23 UV excision repair protein family | chr1:29972406-29975132 REVERSE LENGTH=365;AT1G79650.1 | Symbols: RAD23, RAD23B | Rad23 UV excision repair protein family | chr1:29972406-29975132 REVERSE LENGTH=371;AT1G79650.	3	2	7.1	4.9	39.157	0	6.1384	27	NA	NA	NA	NA	NA	NA	NA	61167000	NA	67177000	44018000	NA	NA	NA	NA	NA	NA	NA	Q84L33	371	53.1
AT1G79830	AT1G79830.3;AT1G79830.2;AT1G79830.1;AT1G79830.4	AT1G79830.3 | Symbols: GC5 | golgin candidate 5 | chr1:30028110-30033508 REVERSE LENGTH=956;AT1G79830.2 | Symbols: GC5 | golgin candidate 5 | chr1:30028110-30033508 REVERSE LENGTH=956;AT1G79830.1 | Symbols: GC5 | golgin candidate 5 | chr1:30028110-30033508	20	20	23.3	23.3	108.35	0	65.762	124	NA	NA	NA	84689000	55937000	136640000	173320000	223650000	200880000	195330000	166970000	225280000	143650000	158010000	151440000	188140000	205070000	158430000	Q0WVL7	956	100
AT1G79850	AT1G79850.1	AT1G79850.1 | Symbols: RPS17, CS17, PRPS17 | ribosomal protein S17 | chr1:30041473-30041922 REVERSE LENGTH=149	3	3	17.4	17.4	16.282	0	4.6829	29	NA	NA	NA	NA	NA	NA	NA	NA	NA	36392000	35319000	55645000	68151000	50716000	49405000	60096000	58622000	76486000	P16180	149	41.6
AT1G79920	AT1G79920.2;AT1G79920.1;AT1G79930.2;AT1G79930.1	AT1G79920.2 | Symbols: | Heat shock protein 70 (Hsp 70) family protein | chr1:30058935-30062224 REVERSE LENGTH=831;AT1G79920.1 | Symbols: | Heat shock protein 70 (Hsp 70) family protein | chr1:30058935-30062224 REVERSE LENGTH=831;AT1G79930.2 | Symbols: H	11	11	14.8	14.8	91.679	0	84.969	294	165410000	123870000	161110000	424120000	454310000	720050000	662890000	768520000	594780000	494290000	499240000	707790000	424420000	440680000	551160000	436340000	468610000	419160000	F4HQD4	831	22.7
AT1G80480	AT1G80480.1;AT1G15730.1	AT1G80480.1 | Symbols: PTAC17 | plastid transcriptionally active 17 | chr1:30258272-30260570 REVERSE LENGTH=444;AT1G15730.1 | Symbols: | Cobalamin biosynthesis CobW-like protein | chr1:5407535-5409937 REVERSE LENGTH=448	4	4	9.2	9.2	49.487	0	20.602	23	NA	NA	NA	NA	NA	NA	NA	NA	NA	37814000	36283000	NA	50238000	56578000	45046000	48805000	51142000	39030000	NA	NA	NA
AT2G01190	AT2G01190.1	AT2G01190.1 | Symbols: | Octicosapeptide/Phox/Bem1p family protein | chr2:115023-117296 FORWARD LENGTH=720	7	7	10.8	10.8	77.337	0	63.878	53	NA	NA	NA	NA	30885000	53858000	54629000	50681000	41068000	50652000	51562000	37961000	31663000	48692000	48916000	30030000	40641000	33217000	NA	NA	NA
AT2G01250	AT2G01250.1;AT2G01250.2	AT2G01250.1 | Symbols: | Ribosomal protein L30/L7 family protein | chr2:132943-134264 REVERSE LENGTH=242;AT2G01250.2 | Symbols: | Ribosomal protein L30/L7 family protein | chr2:133038-134264 REVERSE LENGTH=184	9	4	34.7	19	28.171	0	16.504	28	NA	NA	NA	NA	NA	NA	52122000	93191000	NA	33509000	35015000	181010000	130830000	32968000	NA	61802000	NA	75130000	P60040	242	20.2
AT2G02160	AT2G02160.1	AT2G02160.1 | Symbols: | CCCH-type zinc finger family protein | chr2:553407-555899 REVERSE LENGTH=669	3	3	4.5	4.5	75.831	0	2.8402	18	NA	NA	NA	NA	NA	NA	25392000	NA	NA	NA	NA	NA	25110000	26152000	NA	23218000	NA	19776000	Q9ZUM0	669	100
AT2G02570	AT2G02570.3;AT2G02570.4;AT2G02570.2;AT2G02570.1	AT2G02570.3 | Symbols: | nucleic acid binding;RNA binding | chr2:698361-700794 REVERSE LENGTH=288;AT2G02570.4 | Symbols: | nucleic acid binding;RNA binding | chr2:698361-700794 REVERSE LENGTH=300;AT2G02570.2 | Symbols: | nucleic acid binding;RNA binding	2	2	8.3	8.3	32.034	0	5.272	9	NA	NA	NA	NA	21016000	44318000	NA	NA	NA	NA	NA	NA	NA	NA	NA	NA	NA	NA	NA	NA	NA
AT2G02850	AT2G02850.1	AT2G02850.1 | Symbols: ARPN | plantacyanin | chr2:826630-827720 REVERSE LENGTH=129	2	2	17.1	17.1	14.038	0	5.2299	11	95680000	NA	92556000	NA	NA	NA	NA	NA	NA	NA	NA	NA	NA	NA	NA	NA	NA	NA	Q8LG89	129	8.5
AT2G03420	AT2G03420.1	AT2G03420.1 | Symbols: | unknown protein; Has 38 Blast hits to 38 proteins in 17 species: Archae - 0; Bacteria - 0; Metazoa - 0; Fungi - 0; Plants - 38; Viruses - 0; Other Eukaryotes - 0 (source: NCBI BLink). | chr2:1035100-1035937 REVERSE LENGTH=170	2	2	10.6	10.6	19.028	0	5.6086	18	NA	NA	NA	NA	NA	NA	NA	NA	NA	NA	27814000	50741000	26634000	NA	37354000	69454000	59923000	71019000	NA	NA	NA
AT2G03440	AT2G03440.1	AT2G03440.1 | Symbols: NRP1, ATNRP1 | nodulin-related protein 1 | chr2:1039409-1039972 REVERSE LENGTH=187	4	4	24.6	24.6	19.7	0	25.519	90	224340000	215040000	195800000	152290000	194500000	69494000	229030000	215220000	234740000	314680000	257840000	60577000	331250000	338280000	327910000	450140000	405030000	378340000	Q9ZQ80	187	100
AT2G03680	AT2G03680.2;AT2G03680.1	AT2G03680.2 | Symbols: SPR1, SKU6 | spiral1 | chr2:1121398-1121850 FORWARD LENGTH=119;AT2G03680.1 | Symbols: SPR1, SKU6 | spiral1 | chr2:1121398-1121850 FORWARD LENGTH=119	4	4	42.9	42.9	11.92	0	45.248	74	NA	NA	NA	233270000	105640000	266840000	225700000	294250000	236910000	360940000	501560000	319790000	223700000	252470000	318460000	300720000	205550000	321630000	Q9SJW3	119	100
AT2G03850	AT2G03850.1	AT2G03850.1 | Symbols: | Late embryogenesis abundant protein (LEA) family protein | chr2:1175653-1176597 FORWARD LENGTH=191	2	2	18.3	18.3	20.578	0	52.982	19	NA	NA	NA	35305000	49589000	NA	33502000	39187000	44124000	NA	42598000	40919000	NA	NA	NA	NA	NA	NA	NA	NA	NA
AT2G04030	AT2G04030.2;AT2G04030.1	AT2G04030.2 | Symbols: CR88, Hsp88.1, AtHsp90.5 | Chaperone protein htpG family protein | chr2:1281983-1285909 FORWARD LENGTH=777;AT2G04030.1 | Symbols: CR88, EMB1956, HSP90.5, Hsp88.1, AtHsp90.5 | Chaperone protein htpG family protein | chr2:1281983-12859	14	11	25.2	20.7	88.255	0	95.939	120	NA	NA	NA	107990000	99894000	221890000	158740000	129490000	126960000	173510000	178110000	189810000	252760000	194280000	162000000	238190000	195000000	198630000	Q9SIF2	780	23.7
AT2G04700	AT2G04700.1	AT2G04700.1 | Symbols: | ferredoxin thioredoxin reductase catalytic beta chain family protein | chr2:1646961-1648345 FORWARD LENGTH=146	4	4	26	26	16.434	0	12.319	58	NA	NA	NA	NA	NA	NA	85452000	75501000	81942000	126210000	152220000	117330000	203490000	169750000	169710000	246500000	226780000	236210000	Q9SJ89	146	40.4
AT2G04780	AT2G04780.2;AT2G04780.1	AT2G04780.2 | Symbols: FLA7 | FASCICLIN-like arabinoogalactan 7 | chr2:1677488-1678252 FORWARD LENGTH=254;AT2G04780.1 | Symbols: FLA7 | FASCICLIN-like arabinoogalactan 7 | chr2:1677488-1678252 FORWARD LENGTH=254	4	4	20.5	20.5	26.845	0	56.737	126	178040000	171940000	123650000	253950000	338920000	391080000	753970000	804430000	761160000	1024200000	927020000	1601900000	675210000	969870000	1164600000	1058300000	1267400000	1201500000	Q9SJ81	254	26.4
AT2G05710	AT2G05710.1	AT2G05710.1 | Symbols: ACO3 | aconitase 3 | chr2:2141591-2146350 FORWARD LENGTH=990	9	9	10.6	10.6	108.2	0	21.478	49	NA	NA	NA	NA	NA	NA	NA	73067000	74706000	35734000	NA	47638000	167730000	43740000	66988000	74331000	48277000	93535000	Q9SIB9	990	4.3
AT2G05990	AT2G05990.2;AT2G05990.1	AT2G05990.2 | Symbols: MOD1, ENR1 | NAD(P)-binding Rossmann-fold superfamily protein | chr2:2322876-2324867 FORWARD LENGTH=390;AT2G05990.1 | Symbols: MOD1, ENR1 | NAD(P)-binding Rossmann-fold superfamily protein | chr2:2322876-2324867 FORWARD LENGTH=390	4	4	7.9	7.9	41.213	0	11.141	12	NA	NA	58912000	50100000	NA	157370000	NA	NA	NA	NA	NA	NA	NA	NA	NA	NA	NA	NA	Q9SLA8	390	8.5
AT2G07340	AT2G07340.2;AT2G07340.1	AT2G07340.2 | Symbols: PFD1 | PREFOLDIN 1 | chr2:3045644-3046606 FORWARD LENGTH=127;AT2G07340.1 | Symbols: PFD1 | PREFOLDIN 1 | chr2:3045644-3046606 FORWARD LENGTH=128	5	5	41.7	41.7	14.475	0	271.66	82	NA	NA	NA	181050000	125120000	162600000	141450000	171890000	212670000	138440000	143860000	190900000	141620000	150790000	152640000	147080000	145350000	131300000	NA	NA	NA
AT2G10940	AT2G10940.2;AT2G10940.1	AT2G10940.2 | Symbols: | Bifunctional inhibitor/lipid-transfer protein/seed storage 2S albumin superfamily protein | chr2:4311160-4312035 REVERSE LENGTH=291;AT2G10940.1 | Symbols: | Bifunctional inhibitor/lipid-transfer protein/seed storage 2S albumin su	3	3	11	11	29.648	0	7.1483	39	NA	NA	NA	NA	NA	NA	NA	35164000	NA	106050000	90902000	87838000	164010000	170540000	162770000	481970000	232560000	325290000	NA	NA	NA
AT2G13360	AT2G13360.2;AT2G13360.1	AT2G13360.2 | Symbols: AGT, AGT1, SGAT | alanine:glyoxylate aminotransferase | chr2:5539417-5540902 REVERSE LENGTH=401;AT2G13360.1 | Symbols: AGT, AGT1, SGAT | alanine:glyoxylate aminotransferase | chr2:5539417-5540902 REVERSE LENGTH=401	3	3	8.5	8.5	44.207	0	4.3303	12	NA	NA	NA	NA	NA	NA	NA	NA	NA	NA	NA	NA	58621000	NA	NA	46267000	37237000	60956000	Q56YA5	401	0
AT2G13820	AT2G13820.2;AT2G13820.1	AT2G13820.2 | Symbols: | Bifunctional inhibitor/lipid-transfer protein/seed storage 2S albumin superfamily protein | chr2:5775805-5776279 REVERSE LENGTH=129;AT2G13820.1 | Symbols: | Bifunctional inhibitor/lipid-transfer protein/seed storage 2S albumin su	4	4	31.8	31.8	13.198	0	6.3856	63	NA	NA	NA	NA	NA	NA	106280000	115260000	100240000	136740000	140720000	237940000	144500000	127170000	150550000	184380000	215770000	183070000	Q9ZQI8	169	27.2
AT2G14740	AT2G14740.2;AT2G14740.1;AT2G14720.2;AT2G14720.1	AT2G14740.2 | Symbols: ATVSR3, VSR3, VSR2;2, BP80-2;2 | vaculolar sorting receptor 3 | chr2:6308895-6312303 FORWARD LENGTH=628;AT2G14740.1 | Symbols: ATVSR3, VSR3, VSR2;2, BP80-2;2 | vaculolar sorting receptor 3 | chr2:6308895-6312303 FORWARD LENGTH=628;AT	7	6	11.9	9.7	69.743	0	14.941	33	NA	NA	NA	26590000	41492000	31097000	29744000	NA	NA	26977000	30269000	24882000	NA	NA	NA	30394000	NA	25657000	O80977	628	2.5
AT2G14880	AT2G14880.1	AT2G14880.1 | Symbols: | SWIB/MDM2 domain superfamily protein | chr2:6393686-6394841 REVERSE LENGTH=141	5	2	34.8	17	15.902	0	58.042	70	NA	NA	138210000	95655000	69393000	74624000	83396000	95305000	78134000	119570000	117710000	112250000	84205000	94717000	138140000	93040000	92607000	88747000	NA	NA	NA
AT2G15010	AT2G15010.1	AT2G15010.1 | Symbols: | Plant thionin | chr2:6484422-6485001 FORWARD LENGTH=135	2	2	23	23	14.259	0	323.31	118	423340000	336380000	300390000	332050000	178410000	228640000	348090000	430060000	184700000	166290000	295070000	123800000	98587000	131300000	106480000	115110000	46623000	81177000	Q8VZK8	135	0
AT2G16600	AT2G16600.2;AT2G16600.1	AT2G16600.2 | Symbols: ROC3 | rotamase CYP 3 | chr2:7200862-7201383 FORWARD LENGTH=151;AT2G16600.1 | Symbols: ROC3 | rotamase CYP 3 | chr2:7200862-7201383 FORWARD LENGTH=173	3	2	23.8	19.2	15.992	0	21.998	65	138310000	218890000	161700000	152270000	126400000	200820000	223750000	210530000	171460000	176870000	220200000	129940000	154770000	NA	190880000	140680000	147580000	145480000	Q38900	173	0
AT2G17120	AT2G17120.1	AT2G17120.1 | Symbols: LYM2 | lysm domain GPI-anchored protein 2 precursor | chr2:7459156-7460648 FORWARD LENGTH=350	5	5	17.1	17.1	37.739	0	119.37	103	199620000	211780000	152180000	262810000	181900000	253210000	214530000	241260000	191350000	198420000	210310000	331590000	193720000	219490000	250630000	199510000	238710000	188360000	O23006	350	0
AT2G17190	AT2G17190.1	AT2G17190.1 | Symbols: | ubiquitin family protein | chr2:7478272-7481361 REVERSE LENGTH=538	7	3	16.2	8.4	57.285	0	157.4	61	NA	NA	NA	179690000	159210000	195670000	161570000	161510000	181880000	162220000	110440000	176580000	129040000	125530000	128390000	NA	129720000	NA	Q9SII9	538	91.3
AT2G17200	AT2G17200.1	AT2G17200.1 | Symbols: DSK2 | ubiquitin family protein | chr2:7482133-7485090 REVERSE LENGTH=551	8	4	20.7	13.1	58.053	0	323.31	259	NA	NA	204850000	565190000	503610000	529000000	489500000	499760000	532470000	506260000	489340000	611950000	406500000	391890000	395620000	402540000	405050000	458840000	Q9SII8	551	94.2
AT2G17390	AT2G17390.1	AT2G17390.1 | Symbols: AKR2B | ankyrin repeat-containing 2B | chr2:7555870-7557743 FORWARD LENGTH=344	12	9	28.5	22.4	36.899	0	323.31	210	NA	NA	217280000	305180000	405810000	302670000	476120000	497890000	483880000	489070000	453460000	668500000	423550000	396320000	488570000	472380000	433560000	444450000	Q29Q26	344	46.5
AT2G17870	AT2G17870.1	AT2G17870.1 | Symbols: ATCSP3, CSP3 | cold shock domain protein 3 | chr2:7764276-7765181 REVERSE LENGTH=301	5	5	17.6	17.6	29.564	0	33.237	62	NA	NA	65066000	36409000	73412000	NA	73514000	91119000	75431000	86581000	101200000	NA	64815000	82787000	61581000	89212000	93575000	NA	Q94C69	301	15.3
AT2G18020	AT2G18020.1;AT4G36130.1	AT2G18020.1 | Symbols: EMB2296 | Ribosomal protein L2 family | chr2:7837151-7838160 FORWARD LENGTH=258;AT4G36130.1 | Symbols: | Ribosomal protein L2 family | chr4:17097613-17098656 FORWARD LENGTH=258	3	3	11.6	11.6	27.859	0	17.79	36	NA	NA	NA	NA	NA	NA	68034000	77931000	NA	42699000	38802000	128770000	168810000	53219000	NA	79951000	58068000	80481000	P46286	258	29.5
AT2G18040	AT2G18040.1	AT2G18040.1 | Symbols: PIN1AT | peptidylprolyl cis/trans isomerase, NIMA-interacting 1 | chr2:7842346-7843537 FORWARD LENGTH=119	9	9	65.5	65.5	13.015	0	16.78	181	239770000	255950000	228290000	619100000	441390000	363960000	653430000	784330000	661400000	771850000	822230000	348930000	563830000	695950000	613060000	631910000	567780000	508040000	Q9SL42	119	36.1
AT2G18370	AT2G18370.1	AT2G18370.1 | Symbols: | Bifunctional inhibitor/lipid-transfer protein/seed storage 2S albumin superfamily protein | chr2:7980687-7981475 FORWARD LENGTH=116	3	3	44	44	11.789	0	28.338	58	291420000	492850000	179900000	505990000	240610000	730880000	285850000	539730000	580530000	361090000	333890000	242350000	122700000	NA	NA	NA	NA	NA	Q9ZPW9	116	0
AT2G18540	AT2G18540.1	AT2G18540.1 | Symbols: | RmlC-like cupins superfamily protein | chr2:8042382-8045008 REVERSE LENGTH=707	5	5	10.6	10.6	84.768	0	250.94	37	196950000	414500000	106440000	271840000	157050000	163090000	NA	68095000	NA	NA	NA	NA	NA	NA	NA	NA	NA	NA	F4IQK5	707	39.3
AT2G19480	AT2G19480.3;AT2G19480.2;AT2G19480.1	AT2G19480.3 | Symbols: NAP1;2 | nucleosome assembly protein 1;2 | chr2:8438601-8441040 FORWARD LENGTH=372;AT2G19480.2 | Symbols: NFA02, NFA2, NAP1;2 | nucleosome assembly protein 1;2 | chr2:8438601-8441040 FORWARD LENGTH=373;AT2G19480.1 | Symbols: NFA02, N	8	6	23.9	18.5	42.846	0	20.685	32	NA	NA	NA	NA	NA	NA	40258000	32305000	32030000	46664000	64129000	NA	42745000	52092000	NA	NA	NA	NA	Q9ZUP3	379	46.2
AT2G19730	AT2G19730.3;AT2G19730.2;AT2G19730.1	AT2G19730.3 | Symbols: | Ribosomal L28e protein family | chr2:8511752-8512995 FORWARD LENGTH=143;AT2G19730.2 | Symbols: | Ribosomal L28e protein family | chr2:8511752-8512995 FORWARD LENGTH=143;AT2G19730.1 | Symbols: | Ribosomal L28e protein family | ch	6	5	47.6	38.5	15.895	0	97.264	63	NA	NA	NA	120100000	73718000	41381000	157910000	207020000	131480000	85652000	106910000	530910000	165270000	93674000	93958000	148500000	78179000	145200000	O82204	143	42.7
AT2G19760	AT2G19760.1	AT2G19760.1 | Symbols: PFN1, PRF1 | profilin 1 | chr2:8517074-8518067 REVERSE LENGTH=131	7	4	40.5	32.8	14.266	0	13.565	118	NA	NA	NA	145890000	229390000	253440000	406360000	516650000	323380000	769180000	823930000	283400000	473370000	462070000	394360000	376730000	390390000	341170000	Q42449	131	0
AT2G19900	AT2G19900.1	AT2G19900.1 | Symbols: ATNADP-ME1, NADP-ME1 | NADP-malic enzyme 1 | chr2:8592106-8595403 REVERSE LENGTH=581	7	7	15.8	15.8	64.278	0	31.653	14	NA	NA	68035000	NA	NA	NA	22231000	24515000	NA	NA	NA	NA	NA	NA	NA	NA	NA	NA	O82191	581	4.1
AT2G20270	AT2G20270.1;AT2G20270.2	AT2G20270.1 | Symbols: | Thioredoxin superfamily protein | chr2:8738001-8739617 REVERSE LENGTH=179;AT2G20270.2 | Symbols: | Thioredoxin superfamily protein | chr2:8738001-8739617 REVERSE LENGTH=206	6	6	51.4	51.4	19.125	0	55.937	176	NA	NA	64131000	180760000	145250000	194040000	216510000	252460000	194520000	289140000	292740000	321540000	330100000	333640000	339320000	429590000	406580000	411430000	Q8LBS4	179	15.6
AT2G20280	AT2G20280.1	AT2G20280.1 | Symbols: | Zinc finger C-x8-C-x5-C-x3-H type family protein | chr2:8740054-8742349 REVERSE LENGTH=371	3	3	7.5	7.5	42.389	0	3.6864	13	NA	NA	NA	NA	NA	NA	NA	34629000	37628000	27745000	29178000	32425000	NA	NA	NA	NA	NA	NA	Q9SK74	371	100
AT2G20420	AT2G20420.1	AT2G20420.1 | Symbols: | ATP citrate lyase (ACL) family protein | chr2:8805574-8807858 FORWARD LENGTH=421	9	9	25.9	25.9	45.345	0	26.949	59	NA	NA	NA	NA	93018000	61207000	80352000	78176000	62530000	118900000	111870000	70810000	80878000	74268000	95868000	80472000	89479000	100530000	O82662	421	1.2
AT2G20520	AT2G20520.1	AT2G20520.1 | Symbols: FLA6 | FASCICLIN-like arabinogalactan 6 | chr2:8840663-8841406 FORWARD LENGTH=247	2	2	15.4	15.4	26.506	0	50.3	63	NA	NA	NA	NA	NA	NA	64915000	64830000	55844000	63983000	57546000	103320000	NA	54346000	56969000	54773000	73354000	57422000	Q9SIL7	247	17
AT2G20760	AT2G20760.1	AT2G20760.1 | Symbols: | Clathrin light chain protein | chr2:8943279-8945108 REVERSE LENGTH=338	9	8	23.1	20.7	37.225	0	80.121	186	NA	NA	NA	486520000	413920000	300450000	607100000	614280000	730450000	580450000	552760000	572660000	365280000	477430000	514050000	467730000	474900000	437380000	Q9SKU1	338	100
AT2G21045	AT2G21045.1	AT2G21045.1 | Symbols: | Rhodanese/Cell cycle control phosphatase superfamily protein | chr2:9027858-9028805 FORWARD LENGTH=169	5	5	30.2	30.2	19.039	0	12.491	37	NA	NA	NA	NA	NA	NA	61105000	74633000	54347000	71644000	77289000	59999000	69704000	93746000	64662000	68985000	84875000	62297000	Q8RUD6	169	24.9
AT2G21060	AT2G21060.1	AT2G21060.1 | Symbols: ATGRP2B, ATCSP4, GRP2B | glycine-rich protein 2B | chr2:9036983-9037588 REVERSE LENGTH=201	5	5	55.7	55.7	19.077	0	323.31	225	263600000	322810000	323660000	236340000	269520000	107390000	405080000	371210000	365710000	359990000	461450000	130220000	497550000	407230000	369870000	410600000	397450000	475310000	Q38896	201	100
AT2G21170	AT2G21170.1;AT2G21170.2	AT2G21170.1 | Symbols: TIM, PDTPI | triosephosphate isomerase | chr2:9071047-9073106 REVERSE LENGTH=315;AT2G21170.2 | Symbols: TIM, PDTPI | triosephosphate isomerase | chr2:9071047-9073106 REVERSE LENGTH=306	13	11	54.9	46.7	33.345	0	57.458	196	NA	NA	NA	139100000	304910000	140480000	295500000	289180000	236020000	422700000	489510000	124300000	501670000	560040000	510070000	504810000	663420000	549480000	Q9SKP6	315	9.5
AT2G21490	AT2G21490.1	AT2G21490.1 | Symbols: LEA | dehydrin LEA | chr2:9206209-9207040 REVERSE LENGTH=185	4	4	24.3	24.3	19.298	0	301.18	171	4710400000	2862800000	2628600000	6082300000	5642600000	5345800000	2811400000	2720000000	4125100000	2200000000	1941200000	1593600000	1161800000	1053300000	625330000	327000000	307310000	584340000	Q96261	185	100
AT2G21530	AT2G21530.1	AT2G21530.1 | Symbols: | SMAD/FHA domain-containing protein | chr2:9219372-9220464 FORWARD LENGTH=209	7	7	43.1	43.1	22.675	0	53.144	82	NA	NA	NA	NA	NA	NA	NA	NA	NA	98772000	119460000	122500000	166580000	181770000	153830000	258460000	200960000	237630000	NA	NA	NA
AT2G21620	AT2G21620.1;AT2G21620.2	AT2G21620.1 | Symbols: RD2 | Adenine nucleotide alpha hydrolases-like superfamily protein | chr2:9248749-9249986 FORWARD LENGTH=187;AT2G21620.2 | Symbols: RD2 | Adenine nucleotide alpha hydrolases-like superfamily protein | chr2:9248749-9249986 FORWARD LEN	5	5	34.2	34.2	20.587	0	78.967	43	NA	NA	NA	NA	55528000	NA	65433000	67883000	57152000	76336000	80477000	50736000	57599000	78512000	72799000	67213000	62189000	58886000	NA	NA	NA
AT2G21660	AT2G21660.1;AT2G21660.2	AT2G21660.1 | Symbols: ATGRP7, CCR2, GR-RBP7, GRP7 | cold, circadian rhythm, and rna binding 2 | chr2:9265477-9266316 REVERSE LENGTH=176;AT2G21660.2 | Symbols: ATGRP7, CCR2 | cold, circadian rhythm, and rna binding 2 | chr2:9265477-9266316 REVERSE LENGTH=1	12	9	73.3	65.9	16.89	0	102.31	417	312120000	497930000	483550000	471910000	595980000	592580000	1673900000	1641200000	1606300000	1723600000	1624200000	799990000	1760700000	2707300000	1776900000	1777100000	1908500000	1869300000	Q03250	176	74.4
AT2G21820	AT2G21820.1	AT2G21820.1 | Symbols: | unknown protein; Has 45 Blast hits to 45 proteins in 13 species: Archae - 0; Bacteria - 0; Metazoa - 0; Fungi - 0; Plants - 45; Viruses - 0; Other Eukaryotes - 0 (source: NCBI BLink). | chr2:9302983-9303219 REVERSE LENGTH=78	9	9	74.4	74.4	8.0006	0	323.31	322	5430000000	4509800000	4795100000	2511400000	1531600000	2127500000	1791100000	2294400000	1558100000	1281500000	1494100000	1484700000	606980000	964440000	698640000	744990000	511910000	743190000	NA	NA	NA
AT2G21870	AT2G21870.2;AT2G21870.1	AT2G21870.2 | Symbols: MGP1 | copper ion binding;cobalt ion binding;zinc ion binding | chr2:9320612-9322618 REVERSE LENGTH=220;AT2G21870.1 | Symbols: MGP1 | copper ion binding;cobalt ion binding;zinc ion binding | chr2:9320456-9322618 REVERSE LENGTH=240	4	4	19.5	19.5	25.16	0	28.697	22	NA	NA	NA	NA	NA	NA	NA	NA	NA	65092000	60761000	68580000	NA	NA	29340000	NA	NA	NA	Q9SJ12	240	37.9
AT2G22170	AT2G22170.1	AT2G22170.1 | Symbols: | Lipase/lipooxygenase, PLAT/LH2 family protein | chr2:9427010-9427742 REVERSE LENGTH=183	3	2	14.8	9.3	20.129	0	4.5099	20	NA	NA	NA	NA	47907000	NA	NA	NA	NA	85364000	133070000	NA	51007000	80901000	NA	NA	73133000	NA	Q9SIE7	183	0
AT2G22420	AT2G22420.1	AT2G22420.1 | Symbols: | Peroxidase superfamily protein | chr2:9513341-9514484 FORWARD LENGTH=329	7	7	31.3	31.3	36.67	0	194.81	147	145390000	194510000	122640000	251180000	273340000	217470000	204780000	190500000	219960000	181670000	222100000	121210000	142490000	181840000	181470000	180620000	237570000	161520000	Q9SJZ2	329	1.5
AT2G23110	AT2G23110.2;AT2G23110.1	AT2G23110.2 | Symbols: | Late embryogenesis abundant protein, group 6 | chr2:9840552-9840830 FORWARD LENGTH=92;AT2G23110.1 | Symbols: | Late embryogenesis abundant protein, group 6 | chr2:9840552-9840830 FORWARD LENGTH=92	4	4	33.7	33.7	9.7125	0	59.792	97	752560000	609410000	741150000	517210000	385870000	554860000	348900000	288390000	235660000	163300000	173860000	231280000	70222000	104950000	70845000	NA	NA	NA	NA	NA	NA
AT2G23120	AT2G23120.1	AT2G23120.1 | Symbols: | Late embryogenesis abundant protein, group 6 | chr2:9842102-9842353 FORWARD LENGTH=83	3	3	60.2	60.2	8.4821	0	113.84	77	670090000	324270000	529570000	443330000	348300000	285080000	353410000	NA	365250000	313750000	355250000	356810000	267210000	362930000	252650000	265320000	198980000	382410000	NA	NA	NA
AT2G23240	AT2G23240.2;AT2G23240.1	AT2G23240.2 | Symbols: | Plant EC metallothionein-like protein, family 15 | chr2:9895995-9896325 REVERSE LENGTH=84;AT2G23240.1 | Symbols: | Plant EC metallothionein-like protein, family 15 | chr2:9895995-9896325 REVERSE LENGTH=85	2	2	34.5	34.5	8.3192	0	45.861	30	405820000	382630000	343880000	NA	NA	NA	NA	NA	NA	NA	NA	NA	NA	NA	NA	NA	NA	NA	Q42377	85	9.4
AT2G23350	AT2G23350.1	AT2G23350.1 | Symbols: PAB4, PABP4 | poly(A) binding protein 4 | chr2:9943209-9946041 FORWARD LENGTH=662	4	4	8.9	8.9	71.652	0	16.056	24	NA	NA	NA	NA	NA	NA	NA	NA	NA	41543000	35817000	NA	NA	NA	57088000	NA	NA	NA	O22173	662	36.1
AT2G23820	AT2G23820.2;AT2G23820.1	AT2G23820.2 | Symbols: | Metal-dependent phosphohydrolase | chr2:10140595-10142672 FORWARD LENGTH=257;AT2G23820.1 | Symbols: | Metal-dependent phosphohydrolase | chr2:10140595-10142552 FORWARD LENGTH=245	4	4	18.7	18.7	28.381	0	32.669	68	NA	NA	NA	NA	81393000	NA	78560000	79635000	89071000	83372000	85598000	56989000	82933000	102310000	93843000	92759000	97760000	109590000	NA	NA	NA
AT2G24020	AT2G24020.2;AT2G24020.1	AT2G24020.2 | Symbols: | Uncharacterised BCR, YbaB family COG0718 | chr2:10217869-10219269 REVERSE LENGTH=180;AT2G24020.1 | Symbols: | Uncharacterised BCR, YbaB family COG0718 | chr2:10217869-10219269 REVERSE LENGTH=182	4	2	27.2	15	19.625	0	169.49	159	233220000	220440000	219080000	364940000	399220000	370210000	332810000	373390000	426240000	470160000	421010000	466010000	598650000	649160000	608150000	771510000	828350000	779330000	O82230	182	28.6
AT2G24060	AT2G24060.1	AT2G24060.1 | Symbols: | Translation initiation factor 3 protein | chr2:10229453-10231390 FORWARD LENGTH=312	4	4	14.4	14.4	35.141	0	21.722	28	NA	NA	NA	NA	NA	NA	NA	NA	NA	41524000	35839000	NA	44745000	58052000	56677000	66406000	55518000	63738000	O82234	312	44.6
AT2G24940	AT2G24940.1	AT2G24940.1 | Symbols: AtMAPR2, MAPR2 | membrane-associated progesterone binding protein 2 | chr2:10609447-10609749 FORWARD LENGTH=100	5	5	46	46	11.031	0	303.99	291	1170000000	1242300000	1211500000	1350500000	1115900000	1429600000	1232500000	1442900000	1089800000	912350000	1216800000	1460600000	832900000	998060000	778540000	1036800000	888310000	908400000	Q9SK39	100	0
AT2G25060	AT2G25060.1	AT2G25060.1 | Symbols: ENODL14, AtENODL14 | early nodulin-like protein 14 | chr2:10662308-10662930 FORWARD LENGTH=182	5	5	30.8	30.8	19.482	0	68.233	215	318540000	378300000	263280000	369920000	356220000	509800000	229190000	269870000	266350000	261720000	231040000	439140000	282840000	385190000	318220000	414830000	418950000	380090000	Q9SK27	182	19.8
AT2G25670	AT2G25670.2;AT2G25670.1	AT2G25670.2 | Symbols: | BEST Arabidopsis thaliana protein match is: copper ion binding (TAIR:AT4G32610.1); Has 43784 Blast hits to 26928 proteins in 1799 species: Archae - 86; Bacteria - 6347; Metazoa - 15971; Fungi - 5398; Plants - 1931; Viruses - 259;	3	3	6	6	35.128	0	3.7652	28	NA	NA	NA	NA	NA	52698000	NA	99202000	39378000	78842000	61340000	125320000	NA	NA	NA	NA	NA	NA	NA	NA	NA
AT2G25970	AT2G25970.1	AT2G25970.1 | Symbols: | KH domain-containing protein | chr2:11071844-11075604 REVERSE LENGTH=632	12	12	23.7	23.7	64.606	0	323.31	246	181400000	155490000	242990000	361990000	383070000	317960000	401030000	415530000	439750000	438540000	314450000	423000000	410810000	392190000	416680000	485150000	414680000	428020000	NA	NA	NA
AT2G26210	AT2G26210.3;AT2G26210.2;AT2G26210.1	AT2G26210.3 | Symbols: | Ankyrin repeat family protein | chr2:11157723-11159016 FORWARD LENGTH=167;AT2G26210.2 | Symbols: | Ankyrin repeat family protein | chr2:11157723-11159016 FORWARD LENGTH=167;AT2G26210.1 | Symbols: | Ankyrin repeat family protein	4	4	29.9	29.9	17.688	0	8.0351	16	NA	NA	NA	NA	NA	NA	36762000	NA	30230000	19667000	23507000	24101000	NA	NA	NA	NA	NA	NA	NA	NA	NA
AT2G26570	AT2G26570.1	AT2G26570.1 | Symbols: WEB1 | Plant protein of unknown function (DUF827) | chr2:11299565-11302076 FORWARD LENGTH=807	9	9	13.8	13.8	89.293	0	29.417	68	NA	NA	NA	NA	NA	NA	52288000	70342000	74770000	85900000	63385000	109610000	84379000	88945000	77757000	111750000	102270000	103710000	O48724	807	97.4
AT2G26590	AT2G26590.3;AT2G26590.2;AT2G26590.1	AT2G26590.3 | Symbols: RPN13 | regulatory particle non-ATPase 13 | chr2:11311182-11314717 REVERSE LENGTH=300;AT2G26590.2 | Symbols: RPN13 | regulatory particle non-ATPase 13 | chr2:11311182-11314717 REVERSE LENGTH=300;AT2G26590.1 | Symbols: RPN13 | regulat	6	6	32	32	33.297	0	147	180	NA	NA	NA	144150000	158170000	100500000	156340000	187170000	169400000	158070000	181910000	137700000	139690000	143500000	158130000	152490000	159770000	159010000	O48726	300	33
AT2G26670	AT2G26670.1;AT2G26670.2	AT2G26670.1 | Symbols: HY1, ATHO1, HO1, TED4, GUN2, HY6 | Plant haem oxygenase (decyclizing) family protein | chr2:11341816-11343394 FORWARD LENGTH=282;AT2G26670.2 | Symbols: HY1, ATHO1, HO1, TED4, GUN2, HY6 | Plant haem oxygenase (decyclizing) family prot	5	5	19.5	19.5	32.691	0	33.562	40	NA	NA	NA	NA	NA	NA	NA	45524000	NA	56798000	47946000	17434000	74316000	71388000	59444000	83219000	83015000	63514000	O48782	282	20.6
AT2G27510	AT2G27510.1	AT2G27510.1 | Symbols: ATFD3, FD3 | ferredoxin 3 | chr2:11758281-11758748 REVERSE LENGTH=155	2	2	42.6	42.6	16.633	0	147.91	75	NA	NA	NA	84610000	122380000	85340000	114120000	100010000	104430000	82028000	94372000	78838000	91932000	109230000	78566000	79797000	65786000	80147000	Q9ZQG8	155	15.5
AT2G27710	AT2G27710.3;AT2G27710.2;AT2G27710.1;AT2G27710.4	AT2G27710.3 | Symbols: | 60S acidic ribosomal protein family | chr2:11816929-11817670 FORWARD LENGTH=115;AT2G27710.2 | Symbols: | 60S acidic ribosomal protein family | chr2:11816929-11817670 FORWARD LENGTH=115;AT2G27710.1 | Symbols: | 60S acidic ribosom	9	6	80.9	68.7	11.444	0	264.85	609	NA	NA	114160000	2495900000	2889500000	685370000	3670000000	4172800000	4765800000	4051900000	3686400000	4611300000	2660000000	3227600000	3084100000	2358500000	2790000000	2528500000	Q9SLF7	115	53
AT2G27720	AT2G27720.1;AT2G27720.3;AT2G27720.2	AT2G27720.1 | Symbols: | 60S acidic ribosomal protein family | chr2:11818696-11819370 FORWARD LENGTH=115;AT2G27720.3 | Symbols: | 60S acidic ribosomal protein family | chr2:11818696-11819370 FORWARD LENGTH=127;AT2G27720.2 | Symbols: | 60S acidic ribosom	10	7	80.9	68.7	11.452	0	323.31	796	NA	NA	286130000	4679900000	5024200000	1306400000	7252600000	6589200000	7987300000	5760000000	6202800000	7367800000	5210100000	5259700000	4995600000	4486100000	4484600000	4885300000	P51407	115	60
AT2G27730	AT2G27730.1	AT2G27730.1 | Symbols: | copper ion binding | chr2:11820056-11820867 REVERSE LENGTH=113	2	2	26.5	26.5	11.947	0	72.548	48	NA	NA	NA	110670000	68685000	97929000	100890000	121970000	99521000	127140000	109320000	143170000	69970000	63521000	71490000	76540000	62750000	71293000	Q9ZUX4	113	100
AT2G28000	AT2G28000.1	AT2G28000.1 | Symbols: CPN60A, CH-CPN60A, SLP | chaperonin-60alpha | chr2:11926603-11929184 FORWARD LENGTH=586	25	25	46.9	46.9	62.071	0	323.31	474	NA	NA	NA	279040000	447350000	575240000	808360000	805430000	690730000	1308200000	1501300000	972390000	1730000000	1693400000	1577600000	1591700000	1698400000	1605800000	P21238	586	9.6
AT2G28190	AT2G28190.1	AT2G28190.1 | Symbols: CSD2, CZSOD2 | copper/zinc superoxide dismutase 2 | chr2:12014548-12016303 FORWARD LENGTH=216	5	5	43.5	43.5	22.244	0	323.31	562	2537300000	2734300000	2363700000	2904100000	1928200000	2030700000	1390000000	1652800000	1562700000	2005800000	1573100000	2251800000	1991700000	1990700000	1387100000	2234400000	2886800000	2087500000	O78310	216	8.3
AT2G28290	AT2G28290.2;AT2G28290.3;AT2G28290.1	AT2G28290.2 | Symbols: SYD, CHR3 | P-loop containing nucleoside triphosphate hydrolases superfamily protein | chr2:12056771-12072950 FORWARD LENGTH=3529;AT2G28290.3 | Symbols: SYD, CHR3 | P-loop containing nucleoside triphosphate hydrolases superfamily pro	5	5	2.4	2.4	384.79	0	25.655	21	NA	NA	NA	NA	44916000	38906000	44974000	54312000	55465000	43113000	43513000	62574000	NA	NA	NA	21368000	34227000	NA	NA	NA	NA
AT2G28490	AT2G28490.1	AT2G28490.1 | Symbols: | RmlC-like cupins superfamily protein | chr2:12178812-12180983 REVERSE LENGTH=511	11	11	25.8	25.8	55.704	0	323.31	503	2670000000	5996400000	1890200000	3912100000	7976700000	2499900000	2302500000	2099100000	2250000000	1433600000	1674700000	698850000	483680000	701690000	513460000	279800000	437640000	372920000	Q9SK09	511	18
AT2G29140	AT2G29140.1;AT2G29200.1;AT2G29190.2;AT2G29190.1	AT2G29140.1 | Symbols: APUM3, PUM3 | pumilio 3 | chr2:12531392-12535060 FORWARD LENGTH=964;AT2G29200.1 | Symbols: APUM1, PUM1 | pumilio 1 | chr2:12549483-12553185 REVERSE LENGTH=968;AT2G29190.2 | Symbols: PUM2 | pumilio 2 | chr2:12544260-12548071 REVERSE L	3	3	3.4	3.4	105.99	0	5.2373	6	NA	NA	NA	NA	NA	NA	89335000	NA	88954000	NA	NA	NA	NA	NA	NA	NA	NA	NA	Q9ZW02	964	35.8
AT2G29500	AT2G29500.1	AT2G29500.1 | Symbols: | HSP20-like chaperones superfamily protein | chr2:12633279-12633740 REVERSE LENGTH=153	5	2	30.7	17	17.563	0	5.3801	17	NA	NA	NA	70349000	101070000	76279000	53718000	53708000	NA	NA	23944000	NA	NA	NA	NA	NA	NA	NA	Q9ZW31	153	50.3
AT2G29530	AT2G29530.2;AT2G29530.1;AT2G29530.3	AT2G29530.2 | Symbols: TIM10 | Tim10/DDP family zinc finger protein | chr2:12641026-12642243 REVERSE LENGTH=83;AT2G29530.1 | Symbols: TIM10 | Tim10/DDP family zinc finger protein | chr2:12641026-12642243 REVERSE LENGTH=83;AT2G29530.3 | Symbols: TIM10 | Tim	2	2	21.7	21.7	9.3387	0	3.692	29	NA	NA	77130000	108720000	53357000	47568000	69770000	88825000	71745000	86470000	109070000	133870000	91844000	77731000	91003000	NA	NA	NA	Q9ZW33	83	18.1
AT2G30060	AT2G30060.1	AT2G30060.1 | Symbols: | Pleckstrin homology (PH) domain superfamily protein | chr2:12827035-12828551 FORWARD LENGTH=217	12	8	48.8	37.3	24.389	0	323.31	166	NA	NA	NA	464410000	545830000	625120000	496130000	570720000	543220000	533310000	457820000	509260000	321070000	420720000	408460000	417360000	435400000	332750000	Q8RWG8	217	44.7
AT2G30410	AT2G30410.2;AT2G30410.1	AT2G30410.2 | Symbols: KIS | tubulin folding cofactor A (KIESEL) | chr2:12959812-12960552 FORWARD LENGTH=113;AT2G30410.1 | Symbols: KIS, TFCA | tubulin folding cofactor A (KIESEL) | chr2:12959812-12960552 FORWARD LENGTH=113	8	8	51.3	51.3	12.824	0	86.55	126	192090000	174370000	172350000	299310000	294410000	381690000	358980000	459400000	375150000	442330000	417360000	500810000	256960000	380130000	387090000	458990000	408250000	473380000	O04350	113	100
AT2G30620	AT2G30620.1;AT2G30620.2	AT2G30620.1 | Symbols: | winged-helix DNA-binding transcription factor family protein | chr2:13045360-13046267 FORWARD LENGTH=273;AT2G30620.2 | Symbols: | winged-helix DNA-binding transcription factor family protein | chr2:13045360-13046267 FORWARD LENGT	3	2	9.5	5.9	28.487	0	3.9781	29	NA	NA	NA	NA	NA	NA	45711000	65376000	39016000	48128000	40416000	51049000	41103000	40324000	30804000	58932000	48409000	40085000	P26569	273	100
AT2G30695	AT2G30695.2;AT2G30695.1	AT2G30695.2 | Symbols: | FUNCTIONS IN: molecular_function unknown; INVOLVED IN: protein folding, protein transport; LOCATED IN: chloroplast; EXPRESSED IN: 23 plant structures; EXPRESSED DURING: 13 growth stages; CONTAINS InterPro DOMAIN/s: Trigger factor,	2	2	10.6	10.6	22.26	0	4.4697	10	NA	NA	NA	NA	NA	NA	NA	NA	NA	NA	NA	NA	NA	17589000	20796000	NA	25093000	27261000	NA	NA	NA
AT2G30930	AT2G30930.1	AT2G30930.1 | Symbols: | unknown protein; FUNCTIONS IN: molecular_function unknown; INVOLVED IN: biological_process unknown; LOCATED IN: chloroplast, plasma membrane, membrane; EXPRESSED IN: 24 plant structures; EXPRESSED DURING: 14 growth stages; BEST Ar	5	5	45.7	45.7	16.936	0	71.995	55	NA	NA	NA	NA	NA	73551000	52467000	91415000	NA	129300000	46788000	428760000	86998000	73100000	67856000	136590000	121690000	100210000	NA	NA	NA
AT2G31570	AT2G31570.1	AT2G31570.1 | Symbols: ATGPX2, GPX2 | glutathione peroxidase 2 | chr2:13438211-13439775 REVERSE LENGTH=169	8	8	58.6	58.6	18.944	0	44.897	86	NA	NA	NA	NA	62804000	71683000	111330000	107960000	119020000	153620000	147160000	123810000	123030000	173290000	230280000	182260000	176270000	181670000	O04922	169	6.5
AT2G31610	AT2G31610.1;AT5G35530.1;AT3G53870.1	AT2G31610.1 | Symbols: | Ribosomal protein S3 family protein | chr2:13450384-13451669 FORWARD LENGTH=250;AT5G35530.1 | Symbols: | Ribosomal protein S3 family protein | chr5:13710355-13712192 REVERSE LENGTH=248;AT3G53870.1 | Symbols: | Ribosomal protein	5	5	21.6	21.6	27.519	0	8.4158	21	NA	NA	NA	NA	NA	NA	34514000	NA	NA	NA	NA	NA	106390000	NA	NA	35379000	33427000	54839000	Q9SIP7	250	15.2
AT2G31670	AT2G31670.1	AT2G31670.1 | Symbols: | Stress responsive alpha-beta barrel domain protein | chr2:13472699-13473490 REVERSE LENGTH=263	5	5	20.9	20.9	28.865	0	83.338	27	NA	NA	NA	NA	53976000	32795000	33868000	47118000	NA	NA	NA	NA	43883000	55608000	44342000	46464000	46581000	34698000	Q9SIP1	263	0
AT2G32060	AT2G32060.3;AT2G32060.2;AT2G32060.1	AT2G32060.3 | Symbols: | Ribosomal protein L7Ae/L30e/S12e/Gadd45 family protein | chr2:13639228-13640104 REVERSE LENGTH=144;AT2G32060.2 | Symbols: | Ribosomal protein L7Ae/L30e/S12e/Gadd45 family protein | chr2:13639228-13640104 REVERSE LENGTH=144;AT2G32	10	6	59.7	41.7	15.329	0	161.62	327	83254000	71457000	151340000	2086400000	2342700000	515880000	3505300000	3392400000	3764100000	2936500000	3370000000	2664900000	2589600000	2709400000	2835800000	2475700000	2675600000	2637100000	Q9SKZ3	144	11.8
AT2G32240	AT2G32240.1	AT2G32240.1 | Symbols: | FUNCTIONS IN: molecular_function unknown; INVOLVED IN: response to cadmium ion; LOCATED IN: plasma membrane; EXPRESSED IN: 25 plant structures; EXPRESSED DURING: 13 growth stages; CONTAINS InterPro DOMAIN/s: Prefoldin (InterPro:IP	52	52	45.5	45.5	148.61	0	323.31	423	NA	NA	NA	65667000	101240000	165170000	577310000	656760000	690840000	549630000	397030000	861490000	407050000	454560000	592190000	534270000	654350000	491790000	NA	NA	NA
AT2G32730	AT2G32730.1	AT2G32730.1 | Symbols: | 26S proteasome regulatory complex, non-ATPase subcomplex, Rpn2/Psmd1 subunit | chr2:13880189-13885464 FORWARD LENGTH=1004	3	3	3.8	3.8	108.98	0	9.9644	21	NA	NA	NA	NA	NA	43540000	34193000	52897000	43346000	31152000	27610000	102170000	30611000	28390000	NA	NA	NA	NA	NA	NA	NA
AT2G33070	AT2G33070.2;AT2G33070.1;AT2G33070.3	AT2G33070.2 | Symbols: NSP2, ATNSP2 | nitrile specifier protein 2 | chr2:14029350-14030934 REVERSE LENGTH=471;AT2G33070.1 | Symbols: NSP2, ATNSP2 | nitrile specifier protein 2 | chr2:14029350-14030934 REVERSE LENGTH=471;AT2G33070.3 | Symbols: NSP2 | nitril	18	16	53.9	49.3	51.214	0	103.98	65	134310000	60430000	1012600000	64700000	64162000	133860000	NA	27699000	NA	NA	NA	NA	42942000	NA	NA	NA	NA	NA	O49326	471	2.3
AT2G33150	AT2G33150.1	AT2G33150.1 | Symbols: PKT3, PED1, KAT2 | peroxisomal 3-ketoacyl-CoA thiolase 3 | chr2:14047814-14050983 REVERSE LENGTH=462	7	7	24	24	48.578	0	120.77	41	NA	NA	NA	48480000	NA	111610000	NA	NA	NA	NA	41047000	51288000	102900000	39595000	34433000	37692000	44625000	53332000	Q56WD9	462	3.9
AT2G33210	AT2G33210.2;AT2G33210.1	AT2G33210.2 | Symbols: HSP60-2 | heat shock protein 60-2 | chr2:14075093-14078568 REVERSE LENGTH=580;AT2G33210.1 | Symbols: HSP60-2 | heat shock protein 60-2 | chr2:14075093-14078568 REVERSE LENGTH=585	10	2	21.7	7.9	61.477	0	20.189	39	NA	NA	NA	NA	NA	NA	NA	53924000	39977000	41072000	43838000	69957000	NA	NA	NA	NA	NA	NA	Q8L7B5	585	6.5
AT2G33410	AT2G33410.1	AT2G33410.1 | Symbols: | RNA-binding (RRM/RBD/RNP motifs) family protein | chr2:14156085-14157435 FORWARD LENGTH=404	5	5	17.3	17.3	41.328	0	13.393	44	NA	NA	NA	NA	48483000	NA	91005000	93672000	84936000	87945000	106690000	44908000	NA	125330000	122090000	110330000	117520000	107810000	NA	NA	NA
AT2G33430	AT2G33430.1	AT2G33430.1 | Symbols: DAL1, DAL | differentiation and greening-like 1 | chr2:14162732-14164729 FORWARD LENGTH=219	5	5	24.7	24.7	24.715	0	47.838	61	NA	NA	NA	NA	NA	NA	NA	NA	NA	95244000	84682000	68445000	87564000	94167000	92791000	81718000	107880000	87829000	O22793	219	22.8
AT2G33740	AT2G33740.2;AT2G33740.1	AT2G33740.2 | Symbols: CUTA | Nitrogen regulatory PII-like, alpha/beta | chr2:14269590-14271523 FORWARD LENGTH=182;AT2G33740.1 | Symbols: CUTA | Nitrogen regulatory PII-like, alpha/beta | chr2:14269590-14271326 FORWARD LENGTH=156	6	6	48.9	48.9	19.77	0	42.172	93	122480000	98439000	134440000	163430000	180280000	135080000	150190000	141970000	149520000	119450000	104950000	100640000	118140000	144450000	99187000	181270000	154420000	151060000	P93009	182	3.8
AT2G33830	AT2G33830.1;AT2G33830.2	AT2G33830.1 | Symbols: | Dormancy/auxin associated family protein | chr2:14309768-14310286 REVERSE LENGTH=106;AT2G33830.2 | Symbols: | Dormancy/auxin associated family protein | chr2:14309768-14310286 REVERSE LENGTH=108	3	3	37.7	37.7	11.5	0	27.31	14	65815000	71300000	70710000	NA	NA	NA	NA	NA	NA	NA	NA	NA	NA	NA	NA	NA	NA	NA	P93017	108	100
AT2G34640	AT2G34640.1	AT2G34640.1 | Symbols: PTAC12, HMR | plastid transcriptionally active 12 | chr2:14582061-14584345 REVERSE LENGTH=527	4	4	9.9	9.9	60.895	0	20.384	34	NA	NA	NA	NA	NA	NA	56480000	49427000	NA	52420000	54138000	42647000	48199000	47723000	55862000	56614000	50418000	49370000	F4IHY7	527	100
AT2G34700	AT2G34700.1	AT2G34700.1 | Symbols: | Pollen Ole e 1 allergen and extensin family protein | chr2:14634298-14635597 REVERSE LENGTH=175	2	2	16.6	16.6	18.833	0	57.741	9	NA	NA	94084000	40436000	42596000	49510000	NA	NA	NA	NA	NA	NA	NA	NA	NA	NA	NA	NA	NA	NA	NA
AT2G35010	AT2G35010.2;AT2G35010.1	AT2G35010.2 | Symbols: ATO1, TO1 | thioredoxin O1 | chr2:14754398-14755888 FORWARD LENGTH=194;AT2G35010.1 | Symbols: ATO1, TO1 | thioredoxin O1 | chr2:14754398-14755888 FORWARD LENGTH=194	7	7	40.7	40.7	21.191	0	14.647	99	101960000	133150000	191400000	231410000	306730000	313580000	343540000	342720000	355420000	314100000	295410000	291690000	189740000	262360000	272690000	251520000	229720000	225960000	O64764	194	22.7
AT2G35120	AT2G35120.1	AT2G35120.1 | Symbols: | Single hybrid motif superfamily protein | chr2:14805913-14807274 REVERSE LENGTH=156	6	6	56.4	56.4	17.1	0	123.25	160	277820000	292370000	335730000	610420000	562270000	641760000	609930000	674410000	678260000	646690000	586120000	641360000	427940000	453260000	362550000	341330000	369670000	372170000	O82179	156	20.5
AT2G35300	AT2G35300.1	AT2G35300.1 | Symbols: LEA18 | Late embryogenesis abundant protein, group 1 protein | chr2:14863066-14863359 REVERSE LENGTH=97	2	2	35.1	35.1	10.481	0	323.31	37	878210000	1177300000	1255800000	NA	NA	NA	NA	NA	NA	NA	NA	NA	NA	NA	NA	NA	NA	NA	Q96273	97	100
AT2G35635	AT2G35635.1;AT1G31340.1	AT2G35635.1 | Symbols: UBQ7, RUB2 | ubiquitin 7 | chr2:14981044-14981943 FORWARD LENGTH=154;AT1G31340.1 | Symbols: RUB1, NEDD8, ATRUB1 | related to ubiquitin 1 | chr1:11218076-11219417 REVERSE LENGTH=156	9	3	49.4	16.2	17.15	0	323.31	1227	5328200000	6118700000	5538400000	4384100000	3775500000	4046300000	5160200000	6550300000	4680600000	5486600000	5570000000	5319500000	3340000000	4133500000	4513700000	4723800000	4212200000	4077700000	Q8RUC6	154	16.9
AT2G35880	AT2G35880.1	AT2G35880.1 | Symbols: | TPX2 (targeting protein for Xklp2) protein family | chr2:15063204-15065259 REVERSE LENGTH=432	6	5	16.9	13.7	46.696	0	28.925	23	NA	NA	NA	NA	NA	NA	NA	NA	NA	69069000	63462000	62068000	49113000	57140000	52704000	77394000	69454000	54967000	Q9SJ62	432	100
AT2G36460	AT2G36460.1;AT2G36460.2	AT2G36460.1 | Symbols: | Aldolase superfamily protein | chr2:15296929-15298387 REVERSE LENGTH=358;AT2G36460.2 | Symbols: | Aldolase superfamily protein | chr2:15296929-15297732 REVERSE LENGTH=267	10	4	42.5	14.2	38.386	0	8.9155	23	NA	NA	NA	43504000	32480000	118190000	32495000	37421000	30775000	NA	NA	NA	NA	NA	NA	NA	NA	43671000	Q9SJQ9	358	7
AT2G36530	AT2G36530.1	AT2G36530.1 | Symbols: LOS2, ENO2 | Enolase | chr2:15321081-15323786 REVERSE LENGTH=444	11	11	37.6	37.6	47.719	0	100.8	140	99770000	NA	343560000	211130000	207990000	365540000	240410000	310280000	177780000	236170000	242020000	300260000	367010000	188190000	179150000	210240000	190220000	219860000	P25696	444	0
AT2G36640	AT2G36640.1	AT2G36640.1 | Symbols: ATECP63, ECP63 | embryonic cell protein 63 | chr2:15357019-15358552 REVERSE LENGTH=448	14	13	34.2	32.4	48.492	0	87.622	510	5168200000	3483300000	4638100000	4901500000	4934500000	5700400000	2113400000	2440000000	2810000000	1372500000	1360100000	2114800000	678320000	909840000	880240000	448220000	502770000	446270000	Q9SKP0	448	100
AT2G37220	AT2G37220.1	AT2G37220.1 | Symbols: | RNA-binding (RRM/RBD/RNP motifs) family protein | chr2:15634980-15636331 REVERSE LENGTH=289	13	9	43.6	37.4	30.718	0	162.35	556	NA	NA	NA	2932900000	3048100000	2430000000	4255800000	4820000000	4796600000	7910500000	7838800000	4723400000	10400000000	10200000000	10800000000	10400000000	12300000000	10700000000	Q9ZUU4	289	32.2
AT2G37660	AT2G37660.1	AT2G37660.1 | Symbols: | NAD(P)-binding Rossmann-fold superfamily protein | chr2:15795481-15796977 REVERSE LENGTH=325	9	9	37.8	37.8	34.879	0	176.91	174	46211000	NA	82929000	85608000	191400000	196520000	146850000	155810000	158840000	253610000	330180000	133070000	298830000	356000000	214630000	463690000	497680000	395020000	O80934	325	17.5
AT2G38040	AT2G38040.2;AT2G38040.1	AT2G38040.2 | Symbols: CAC3 | acetyl Co-enzyme a carboxylase carboxyltransferase alpha subunit | chr2:15917612-15920749 FORWARD LENGTH=769;AT2G38040.1 | Symbols: CAC3 | acetyl Co-enzyme a carboxylase carboxyltransferase alpha subunit | chr2:15917612-159207	11	11	15.7	15.7	85.305	0	52.075	89	NA	NA	NA	61235000	75842000	93162000	116200000	154660000	122240000	182280000	169850000	203770000	199870000	160160000	182030000	298890000	274260000	278550000	Q9LD43	769	26.7
AT2G38140	AT2G38140.1	AT2G38140.1 | Symbols: PSRP4 | plastid-specific ribosomal protein 4 | chr2:15980948-15981459 FORWARD LENGTH=118	6	6	23.7	23.7	12.783	0	8.6523	125	NA	NA	NA	NA	NA	NA	NA	90275000	108420000	178490000	111730000	235760000	221830000	241610000	340400000	284370000	218710000	269510000	O80439	118	81.4
AT2G38230	AT2G38230.1	AT2G38230.1 | Symbols: ATPDX1.1, PDX1.1 | pyridoxine biosynthesis 1.1 | chr2:16011475-16012404 FORWARD LENGTH=309	4	3	13.9	11.3	32.862	0	14.965	33	NA	NA	NA	NA	NA	NA	NA	NA	NA	45326000	54378000	NA	85898000	33831000	44917000	59047000	41210000	98360000	O80448	309	0
AT2G38380	AT2G38380.1;AT2G38390.1	AT2G38380.1 | Symbols: | Peroxidase superfamily protein | chr2:16076443-16078314 FORWARD LENGTH=349;AT2G38390.1 | Symbols: | Peroxidase superfamily protein | chr2:16079726-16081381 FORWARD LENGTH=349	3	2	7.4	4.6	38.108	0.00075415	2.3586	8	NA	NA	NA	NA	NA	NA	NA	NA	NA	NA	NA	NA	NA	NA	NA	135300000	125490000	128970000	P24102	349	0
AT2G38530	AT2G38530.1	AT2G38530.1 | Symbols: LTP2, LP2, cdf3 | lipid transfer protein 2 | chr2:16128481-16128948 FORWARD LENGTH=118	6	5	52.5	46.6	11.938	0	167.24	197	11400000000	9240800000	8597800000	1288800000	484940000	3289300000	967290000	1054700000	878250000	869900000	672550000	3178100000	899250000	1001600000	1194300000	2037500000	911970000	1608500000	Q9S7I3	118	0
AT2G38540	AT2G38540.1	AT2G38540.1 | Symbols: LP1, LTP1, ATLTP1 | lipid transfer protein 1 | chr2:16130418-16130893 FORWARD LENGTH=118	5	5	36.4	36.4	11.755	0	42.499	82	NA	NA	NA	107960000	77166000	226000000	134310000	112720000	147000000	138570000	116700000	745990000	342210000	389850000	320480000	1103900000	408480000	992870000	Q42589	118	0
AT2G38870	AT2G38870.1	AT2G38870.1 | Symbols: | Serine protease inhibitor, potato inhibitor I-type family protein | chr2:16236546-16237050 REVERSE LENGTH=70	4	4	75.7	75.7	7.6215	0	218.9	97	561830000	555520000	497560000	222720000	116880000	225570000	99850000	155910000	119640000	77844000	102520000	91713000	65016000	91876000	56502000	90331000	64791000	72706000	NA	NA	NA
AT2G38880	AT2G38880.6;AT2G38880.4;AT2G38880.7;AT2G38880.3;AT2G38880.5;AT2G38880.2;AT2G38880.1;AT2G38880.8	AT2G38880.6 | Symbols: NF-YB1 | nuclear factor Y, subunit B1 | chr2:16238685-16240143 FORWARD LENGTH=112;AT2G38880.4 | Symbols: NF-YB1 | nuclear factor Y, subunit B1 | chr2:16238685-16240143 FORWARD LENGTH=112;AT2G38880.7 | Symbols: NF-YB1 | nuclear factor	3	3	30.4	30.4	12.446	0	24.551	30	49062000	45863000	31402000	57593000	55500000	18672000	30215000	21491000	50773000	NA	16719000	20804000	NA	NA	NA	NA	NA	NA	Q9SLG0	141	60.3
AT2G39730	AT2G39730.1;AT2G39730.3;AT2G39730.2	AT2G39730.1 | Symbols: RCA | rubisco activase | chr2:16570951-16573345 REVERSE LENGTH=474;AT2G39730.3 | Symbols: RCA | rubisco activase | chr2:16571174-16573345 REVERSE LENGTH=441;AT2G39730.2 | Symbols: RCA | rubisco activase | chr2:16571046-16573345 REVER	14	14	35.9	35.9	51.981	0	323.31	364	NA	NA	NA	NA	NA	95221000	49169000	81567000	56214000	500710000	648790000	757120000	1679700000	979800000	922250000	1508300000	1662300000	1571200000	P10896	474	15.8
AT2G40060	AT2G40060.1	AT2G40060.1 | Symbols: | Clathrin light chain protein | chr2:16726564-16728001 FORWARD LENGTH=258	9	9	31.4	31.4	28.837	0	16.733	102	NA	NA	NA	202000000	263780000	177400000	283380000	326490000	363260000	404010000	382210000	287960000	294180000	273240000	325270000	368720000	327070000	379990000	O04209	258	100
AT2G40170	AT2G40170.1	AT2G40170.1 | Symbols: ATEM6, GEA6, EM6 | Stress induced protein | chr2:16779792-16780167 REVERSE LENGTH=92	8	8	71.7	71.7	9.9337	0	323.31	306	32500000000	32700000000	29800000000	2939200000	1917700000	3108800000	729050000	1040400000	944610000	334260000	362380000	495750000	87361000	63277000	56090000	46341000	90189000	69431000	Q02973	92	100
AT2G40300	AT2G40300.1	AT2G40300.1 | Symbols: ATFER4, FER4 | ferritin 4 | chr2:16831501-16833214 REVERSE LENGTH=259	6	5	29	25.1	29.029	0	13.794	52	NA	NA	NA	NA	NA	NA	NA	NA	NA	NA	32915000	47224000	138860000	131270000	118590000	226830000	186690000	218900000	Q9S756	259	21.2
AT2G40490	AT2G40490.1	AT2G40490.1 | Symbols: HEME2 | Uroporphyrinogen decarboxylase | chr2:16912961-16914988 FORWARD LENGTH=394	3	3	11.2	11.2	43.579	0	4.4973	9	NA	NA	NA	NA	NA	NA	NA	NA	NA	NA	NA	NA	57386000	NA	NA	36234000	26261000	37558000	O22886	394	11.4
AT2G40570	AT2G40570.2;AT2G40570.1	AT2G40570.2 | Symbols: | initiator tRNA phosphoribosyl transferase family protein | chr2:16941066-16942977 FORWARD LENGTH=462;AT2G40570.1 | Symbols: | initiator tRNA phosphoribosyl transferase family protein | chr2:16941066-16943288 FORWARD LENGTH=521	2	2	3.9	3.9	52.12	0.00075188	2.3367	39	NA	NA	131220000	252100000	NA	170420000	NA	112830000	128210000	115020000	148930000	171780000	NA	NA	NA	NA	NA	NA	NA	NA	NA
AT2G40620	AT2G40620.1	AT2G40620.1 | Symbols: | Basic-leucine zipper (bZIP) transcription factor family protein | chr2:16954804-16956872 REVERSE LENGTH=367	2	2	7.6	7.6	40.666	0	16.245	9	NA	NA	NA	NA	NA	NA	21874000	22313000	21673000	20984000	23653000	NA	NA	NA	NA	NA	NA	NA	O22873	367	86.9
AT2G40880	AT2G40880.1	AT2G40880.1 | Symbols: FL3-27, ATCYSA, CYSA | cystatin A | chr2:17057463-17057930 FORWARD LENGTH=125	2	2	16.8	16.8	14.421	0	7.0735	8	NA	NA	NA	NA	NA	NA	NA	NA	NA	NA	NA	NA	NA	NA	NA	39228000	NA	44126000	Q41906	125	0
AT2G41260	AT2G41260.1;AT2G41260.2	AT2G41260.1 | Symbols: M17, ATM17 | glycine-rich protein / late embryogenesis abundant protein (M17) | chr2:17206541-17207492 FORWARD LENGTH=225;AT2G41260.2 | Symbols: M17, ATM17 | glycine-rich protein / late embryogenesis abundant protein (M17) | chr2:172	3	3	41.8	41.8	23.887	0	323.31	21	388320000	320340000	423140000	NA	NA	NA	NA	NA	NA	NA	NA	NA	NA	NA	NA	NA	NA	NA	Q9S7S3	280	16.8
AT2G41280	AT2G41280.1	AT2G41280.1 | Symbols: M10, ATM10 | late embryogenesis abundant protein (M10) / LEA protein M10 | chr2:17209763-17210211 FORWARD LENGTH=107	3	3	59.8	59.8	11.432	0	312.51	8	191020000	172620000	206830000	NA	NA	NA	NA	NA	NA	NA	NA	NA	NA	NA	NA	NA	NA	NA	O81483	107	12.1
AT2G41740	AT2G41740.1	AT2G41740.1 | Symbols: VLN2, ATVLN2 | villin 2 | chr2:17410962-17416878 REVERSE LENGTH=976	9	9	13.5	13.5	107.84	0	70.368	167	NA	NA	NA	NA	NA	106140000	199510000	213050000	240070000	266390000	218260000	379020000	239870000	274260000	265660000	295850000	289190000	266510000	O81644	976	27
AT2G42560	AT2G42560.1	AT2G42560.1 | Symbols: | late embryogenesis abundant domain-containing protein / LEA domain-containing protein | chr2:17714813-17716821 REVERSE LENGTH=635	47	47	61.9	61.9	67.195	0	323.31	1507	47600000000	28300000000	48300000000	18200000000	13700000000	12800000000	3524400000	3963700000	5034900000	1606600000	1493200000	2089100000	565610000	724410000	610360000	452410000	569760000	469320000	NA	NA	NA
AT2G43090	AT2G43090.1;AT2G43090.2	AT2G43090.1 | Symbols: | Aconitase/3-isopropylmalate dehydratase protein | chr2:17918957-17919712 FORWARD LENGTH=251;AT2G43090.2 | Symbols: | Aconitase/3-isopropylmalate dehydratase protein | chr2:17918957-17919712 FORWARD LENGTH=222	8	7	41.8	36.7	26.79	0	313.83	231	NA	NA	NA	175080000	316820000	188280000	322910000	315060000	335180000	460200000	401900000	166260000	349870000	443670000	425770000	456060000	479450000	445470000	Q9ZW85	251	25.1
AT2G43510	AT2G43510.1	AT2G43510.1 | Symbols: ATTI1, TI1 | trypsin inhibitor protein 1 | chr2:18067211-18067620 FORWARD LENGTH=89	2	2	25.8	25.8	9.8854	0	7.5517	63	NA	NA	NA	97739000	99562000	92764000	109720000	96727000	65377000	48703000	83862000	79216000	54257000	62517000	54608000	82661000	67424000	NA	Q42328	89	0
AT2G43520	AT2G43520.1	AT2G43520.1 | Symbols: ATTI2, TI2 | trypsin inhibitor protein 2 | chr2:18068611-18069037 FORWARD LENGTH=90	2	2	24.4	24.4	9.6604	0	15.959	49	492040000	589480000	696680000	NA	NA	86192000	NA	25677000	47154000	NA	NA	38162000	NA	NA	NA	NA	NA	NA	O22866	90	0
AT2G43535	AT2G43535.1	AT2G43535.1 | Symbols: | Scorpion toxin-like knottin superfamily protein | chr2:18071130-18071560 FORWARD LENGTH=97	3	3	30.9	30.9	10.671	0	15.727	110	176750000	168730000	139010000	178040000	105720000	223530000	392160000	374300000	282350000	258910000	318650000	303320000	333740000	409740000	319790000	520440000	342190000	385460000	Q8RYE7	97	0
AT2G43560	AT2G43560.1	AT2G43560.1 | Symbols: | FKBP-like peptidyl-prolyl cis-trans isomerase family protein | chr2:18073995-18075385 REVERSE LENGTH=223	4	4	16.1	16.1	23.564	0	6.205	88	NA	NA	NA	106730000	NA	110960000	81514000	81191000	56427000	150800000	154070000	173780000	200020000	223050000	252940000	372240000	335710000	339920000	O22870	223	4.5
AT2G43750	AT2G43750.2;AT2G43750.1	AT2G43750.2 | Symbols: OASB | O-acetylserine (thiol) lyase B | chr2:18129604-18132322 REVERSE LENGTH=392;AT2G43750.1 | Symbols: OASB, ACS1, CPACS1, ATCS-B | O-acetylserine (thiol) lyase B | chr2:18129604-18132322 REVERSE LENGTH=392	4	4	12	12	41.656	0	22.635	15	NA	NA	NA	NA	NA	NA	NA	NA	NA	19637000	22230000	NA	NA	NA	NA	NA	NA	NA	P47999	392	13
AT2G43810	AT2G43810.2;AT2G43810.1;AT3G59810.1	AT2G43810.2 | Symbols: | Small nuclear ribonucleoprotein family protein | chr2:18149725-18150879 FORWARD LENGTH=91;AT2G43810.1 | Symbols: | Small nuclear ribonucleoprotein family protein | chr2:18149725-18150879 FORWARD LENGTH=91;AT3G59810.1 | Symbols:	2	2	18.7	18.7	9.7279	0.00076104	2.4622	19	NA	NA	NA	NA	NA	40312000	37334000	42137000	36916000	39804000	39933000	33222000	41053000	32842000	54578000	NA	NA	NA	O22823	91	35.2
AT2G43910	AT2G43910.1;AT2G43910.2;AT2G43910.3	AT2G43910.1 | Symbols: ATHOL1, HOL1 | HARMLESS TO OZONE LAYER 1 | chr2:18184658-18186951 REVERSE LENGTH=227;AT2G43910.2 | Symbols: ATHOL1, HOL1 | HARMLESS TO OZONE LAYER 1 | chr2:18184596-18186951 REVERSE LENGTH=246;AT2G43910.3 | Symbols: ATHOL1, HOL1 | HA	5	5	26	26	25.288	0	6.8388	16	NA	NA	NA	NA	NA	NA	NA	NA	NA	NA	23189000	25814000	58054000	35068000	NA	33545000	26001000	32818000	Q0WP12	227	14.1
AT2G44060	AT2G44060.2;AT2G44060.1	AT2G44060.2 | Symbols: | Late embryogenesis abundant protein, group 2 | chr2:18226922-18227988 FORWARD LENGTH=325;AT2G44060.1 | Symbols: | Late embryogenesis abundant protein, group 2 | chr2:18226922-18227988 FORWARD LENGTH=325	9	9	30.8	30.8	36.036	0	83.621	158	NA	NA	NA	NA	150770000	97494000	342880000	281810000	261890000	316890000	331320000	217580000	218180000	288730000	244300000	247270000	278480000	268650000	NA	NA	NA
AT2G44300	AT2G44300.1;AT2G44290.1	AT2G44300.1 | Symbols: | Bifunctional inhibitor/lipid-transfer protein/seed storage 2S albumin superfamily protein | chr2:18307468-18308286 REVERSE LENGTH=204;AT2G44290.1 | Symbols: | Bifunctional inhibitor/lipid-transfer protein/seed storage 2S albumin	2	2	16.2	16.2	21.706	0	11.57	11	NA	NA	NA	NA	NA	NA	NA	NA	NA	NA	NA	NA	NA	NA	61075000	51097000	NA	58947000	NA	NA	NA
AT2G44310	AT2G44310.1	AT2G44310.1 | Symbols: | Calcium-binding EF-hand family protein | chr2:18309285-18309713 FORWARD LENGTH=142	8	8	57	57	15.821	0	323.31	369	599170000	588120000	738860000	828810000	879680000	732710000	617800000	578070000	754480000	496470000	513150000	553180000	412210000	488930000	512130000	513110000	482030000	467920000	NA	NA	NA
AT2G44650	AT2G44650.1	AT2G44650.1 | Symbols: CHL-CPN10, CPN10 | chloroplast chaperonin 10 | chr2:18419521-18420510 REVERSE LENGTH=139	7	5	54.7	43.2	15.049	0	66.831	148	NA	NA	99781000	352440000	271220000	307330000	320730000	444790000	254860000	560650000	600560000	547090000	651560000	735870000	653220000	891330000	866640000	842290000	O80504	139	22.3
AT2G44790	AT2G44790.1	AT2G44790.1 | Symbols: UCC2 | uclacyanin 2 | chr2:18462182-18463232 REVERSE LENGTH=202	4	4	28.2	28.2	20.354	0	172.8	113	NA	NA	NA	NA	NA	NA	197690000	310370000	214370000	517200000	466930000	520760000	533050000	512090000	813450000	705280000	664930000	708590000	O80517	202	27.7
AT2G44920	AT2G44920.2;AT2G44920.1	AT2G44920.2 | Symbols: | Tetratricopeptide repeat (TPR)-like superfamily protein | chr2:18524419-18526502 FORWARD LENGTH=224;AT2G44920.1 | Symbols: | Tetratricopeptide repeat (TPR)-like superfamily protein | chr2:18524419-18526236 FORWARD LENGTH=210	8	8	47.3	47.3	23.778	0	220.89	200	NA	NA	NA	NA	NA	NA	55555000	135690000	45907000	312010000	311260000	342460000	574160000	632350000	509750000	929760000	876460000	811840000	O22160	224	0
AT2G45470	AT2G45470.1	AT2G45470.1 | Symbols: FLA8, AGP8 | FASCICLIN-like arabinogalactan protein 8 | chr2:18742797-18744059 REVERSE LENGTH=420	11	8	36.4	29.8	43.074	0	286.41	243	289660000	344750000	259850000	248240000	239550000	296990000	275760000	282460000	302510000	640600000	530140000	800610000	934830000	843760000	1166900000	926390000	1006800000	1110000000	O22126	420	21.7
AT2G47400	AT2G47400.1	AT2G47400.1 | Symbols: CP12-1, CP12 | CP12 domain-containing protein 1 | chr2:19446889-19447263 FORWARD LENGTH=124	5	5	53.2	53.2	13.487	0	323.31	247	725500000	336350000	617990000	624990000	507060000	669810000	597440000	471350000	576220000	888220000	1043600000	1130000000	1295900000	1130000000	752880000	1753300000	1190000000	1335100000	O22914	124	67.7
AT2G47470	AT2G47470.3;AT2G47470.1;AT2G47470.4;AT2G47470.2	AT2G47470.3 | Symbols: ATPDIL2-1, UNE5, MEE30, PDI11, ATPDI11 | thioredoxin family protein | chr2:19481503-19483571 FORWARD LENGTH=323;AT2G47470.1 | Symbols: ATPDIL2-1, UNE5, MEE30, PDI11, ATPDI11 | thioredoxin family protein | chr2:19481503-19483683 FORWA	11	11	44	44	35.62	0	41.301	178	NA	NA	149930000	217620000	230070000	464980000	306220000	304670000	306040000	352310000	311200000	323520000	206830000	231880000	260220000	194680000	227420000	197860000	O22263	361	0
AT2G47730	AT2G47730.1	AT2G47730.1 | Symbols: ATGSTF8, ATGSTF5, GST6, GSTF8 | glutathione S-transferase phi 8 | chr2:19558213-19559266 FORWARD LENGTH=263	7	6	33.1	30	29.231	0	87.524	42	NA	NA	NA	NA	NA	NA	45021000	62147000	40105000	81592000	114750000	34114000	87111000	97003000	NA	75933000	97015000	82206000	Q96266	263	5.7
AT3G01390	AT3G01390.2;AT3G01390.1	AT3G01390.2 | Symbols: VMA10, AVMA10 | vacuolar membrane ATPase 10 | chr3:150265-150922 REVERSE LENGTH=110;AT3G01390.1 | Symbols: VMA10, AVMA10 | vacuolar membrane ATPase 10 | chr3:150265-150922 REVERSE LENGTH=110	6	6	50	50	12.397	0	268.57	205	NA	NA	NA	536680000	485190000	609110000	652470000	786630000	790030000	819290000	593990000	800310000	649090000	599090000	569170000	747030000	606090000	573140000	O82628	110	100
AT3G01480	AT3G01480.1;AT3G01480.2	AT3G01480.1 | Symbols: CYP38, ATCYP38 | cyclophilin 38 | chr3:188569-190674 FORWARD LENGTH=437;AT3G01480.2 | Symbols: CYP38, ATCYP38 | cyclophilin 38 | chr3:188569-190252 FORWARD LENGTH=355	7	7	23.6	23.6	47.981	0	44.961	18	NA	NA	NA	NA	NA	NA	NA	NA	NA	NA	32080000	NA	NA	45883000	44634000	55208000	101630000	48596000	Q9SSA5	437	6.2
AT3G01500	AT3G01500.1;AT3G01500.3;AT3G01500.2	AT3G01500.1 | Symbols: CA1, ATBCA1, SABP3, ATSABP3 | carbonic anhydrase 1 | chr3:194853-196716 REVERSE LENGTH=270;AT3G01500.3 | Symbols: CA1 | carbonic anhydrase 1 | chr3:195173-197873 REVERSE LENGTH=336;AT3G01500.2 | Symbols: CA1 | carbonic anhydrase 1 |	7	5	33.3	22.2	29.504	0	120.1	50	NA	NA	NA	NA	NA	NA	NA	NA	NA	NA	NA	NA	267940000	23819000	36737000	123860000	77648000	149640000	P27140	347	17.6
AT3G01570	AT3G01570.1	AT3G01570.1 | Symbols: | Oleosin family protein | chr3:222152-222778 REVERSE LENGTH=183	4	4	18.6	18.6	19.754	0	8.6097	23	262830000	185190000	421610000	130620000	NA	NA	NA	136500000	NA	NA	NA	NA	NA	NA	NA	NA	NA	NA	Q9SS98	183	45.9
AT3G02180	AT3G02180.2;AT3G02180.1;AT3G02180.3	AT3G02180.2 | Symbols: SP1L3 | SPIRAL1-like3 | chr3:404989-405457 FORWARD LENGTH=122;AT3G02180.1 | Symbols: SP1L3 | SPIRAL1-like3 | chr3:404989-405457 FORWARD LENGTH=122;AT3G02180.3 | Symbols: SP1L3 | SPIRAL1-like3 | chr3:404989-405375 FORWARD LENGTH=93	2	2	20.5	20.5	12.172	0	5.591	25	NA	NA	NA	NA	NA	NA	NA	NA	NA	52531000	47731000	45508000	NA	64672000	48494000	72396000	60016000	62188000	Q9S7P8	122	100
AT3G02480	AT3G02480.1	AT3G02480.1 | Symbols: | Late embryogenesis abundant protein (LEA) family protein | chr3:512384-512857 FORWARD LENGTH=68	5	5	67.6	67.6	7.1448	0	186.77	183	12100000000	12000000000	10200000000	5476400000	2803800000	7223300000	2073200000	2693800000	2331100000	1616800000	1950000000	1886400000	634480000	771080000	658900000	683680000	600750000	656460000	NA	NA	NA
AT3G02540	AT3G02540.3;AT3G02540.1;AT3G02540.2	AT3G02540.3 | Symbols: RAD23C | Rad23 UV excision repair protein family | chr3:533095-536151 REVERSE LENGTH=418;AT3G02540.1 | Symbols: RAD23-3, RAD23C | Rad23 UV excision repair protein family | chr3:533095-536151 REVERSE LENGTH=419;AT3G02540.2 | Symbols:	6	4	14.4	10.3	44.159	0	54.159	113	NA	NA	NA	373750000	417530000	949980000	592690000	574970000	629330000	760850000	694160000	615060000	662650000	675540000	723080000	836450000	886610000	784040000	Q84L31	419	87.8
AT3G02730	AT3G02730.1	AT3G02730.1 | Symbols: TRXF1, ATF1 | thioredoxin F-type 1 | chr3:588570-589591 REVERSE LENGTH=178	4	3	22.5	18	19.325	0	28.279	47	NA	NA	NA	NA	NA	NA	NA	NA	NA	NA	NA	NA	163880000	154390000	133940000	294660000	223070000	275080000	Q9XFH8	178	31.5
AT3G02740	AT3G02740.1	AT3G02740.1 | Symbols: | Eukaryotic aspartyl protease family protein | chr3:590561-593089 FORWARD LENGTH=488	4	4	8.6	8.6	52.808	0	6.329	15	NA	NA	NA	NA	NA	NA	NA	NA	NA	NA	29004000	NA	30965000	42538000	48130000	35473000	52341000	39099000	NA	NA	NA
AT3G04400	AT3G04400.2;AT3G04400.1;AT2G33370.1;AT1G04480.1	AT3G04400.2 | Symbols: emb2171 | Ribosomal protein L14p/L23e family protein | chr3:1167611-1168308 FORWARD LENGTH=125;AT3G04400.1 | Symbols: emb2171 | Ribosomal protein L14p/L23e family protein | chr3:1167339-1168308 FORWARD LENGTH=140;AT2G33370.1 | Symbol	3	3	21.6	21.6	13.406	0	3.5111	10	NA	NA	NA	NA	NA	NA	NA	NA	NA	NA	NA	NA	96688000	NA	29656000	NA	NA	NA	P49690	140	12.9
AT3G04610	AT3G04610.1	AT3G04610.1 | Symbols: FLK | RNA-binding KH domain-containing protein | chr3:1250762-1254272 REVERSE LENGTH=577	7	7	13.7	13.7	63.403	0	58.298	39	NA	NA	NA	85209000	NA	82816000	45165000	46745000	51922000	NA	NA	35700000	39906000	60820000	NA	55028000	43691000	46675000	Q9SR13	577	87.3
AT3G04710	AT3G04710.1;AT3G04710.2;AT3G04710.3	AT3G04710.1 | Symbols: TPR10 | ankyrin repeat family protein | chr3:1278229-1280942 FORWARD LENGTH=456;AT3G04710.2 | Symbols: TPR10 | ankyrin repeat family protein | chr3:1278229-1280942 FORWARD LENGTH=455;AT3G04710.3 | Symbols: TPR10 | ankyrin repeat fami	14	14	46.5	46.5	49.259	0	67.068	93	NA	NA	NA	141050000	332730000	203540000	177280000	255800000	207860000	215390000	200150000	105380000	110820000	108120000	84181000	87385000	86320000	94736000	NA	NA	NA
AT3G04720	AT3G04720.1	AT3G04720.1 | Symbols: PR4, HEL, PR-4 | pathogenesis-related 4 | chr3:1285691-1286531 REVERSE LENGTH=212	4	4	25.9	25.9	22.936	0	16.632	73	107350000	68369000	95449000	167980000	155070000	225090000	146930000	166820000	146010000	80182000	74128000	174050000	82681000	NA	NA	131860000	81291000	107160000	P43082	212	0
AT3G04790	AT3G04790.1	AT3G04790.1 | Symbols: | Ribose 5-phosphate isomerase, type A protein | chr3:1313365-1314195 FORWARD LENGTH=276	2	2	13	13	29.305	0	11.72	33	NA	NA	NA	28673000	NA	113820000	NA	NA	NA	29681000	35676000	66188000	87456000	52403000	51764000	71627000	74303000	69297000	Q9S726	276	14.9
AT3G04840	AT3G04840.1	AT3G04840.1 | Symbols: | Ribosomal protein S3Ae | chr3:1329751-1331418 FORWARD LENGTH=262	5	3	18.7	10.3	29.85	0	35.028	12	NA	NA	NA	NA	NA	NA	65627000	59522000	44730000	NA	32577000	58971000	69219000	NA	NA	NA	NA	NA	Q9CAV0	262	19.8
AT3G04880	AT3G04880.1	AT3G04880.1 | Symbols: DRT102 | DNA-damage-repair/toleration protein (DRT102) | chr3:1346431-1347363 REVERSE LENGTH=310	2	2	6.8	6.8	33.233	0	2.9093	2	NA	NA	NA	NA	NA	NA	NA	NA	NA	25699000	23238000	NA	NA	NA	NA	NA	NA	NA	Q05212	310	1.3
AT3G04920	AT3G04920.1;AT5G28060.1	AT3G04920.1 | Symbols: | Ribosomal protein S24e family protein | chr3:1360989-1362065 FORWARD LENGTH=133;AT5G28060.1 | Symbols: | Ribosomal protein S24e family protein | chr5:10069791-10070792 REVERSE LENGTH=133	2	2	19.5	19.5	15.372	0	4.6466	15	NA	NA	NA	NA	NA	NA	NA	NA	NA	NA	8471000	36949000	42721000	NA	NA	17591000	NA	27802000	Q9SS17	133	39.8
AT3G05020	AT3G05020.1	AT3G05020.1 | Symbols: ACP1, ACP | acyl carrier protein 1 | chr3:1391863-1392878 REVERSE LENGTH=137	5	5	21.2	21.2	15.055	0	91.593	217	794950000	741780000	969690000	733450000	609980000	605630000	541090000	757200000	556040000	675290000	980230000	608190000	346870000	280570000	241350000	266520000	322170000	413720000	P11829	137	20.4
AT3G05070	AT3G05070.1	AT3G05070.1 | Symbols: | CONTAINS InterPro DOMAIN/s: mRNA splicing factor, Cwf18 (InterPro:IPR013169); Has 292 Blast hits to 292 proteins in 153 species: Archae - 0; Bacteria - 0; Metazoa - 118; Fungi - 83; Plants - 38; Viruses - 11; Other Eukaryotes - 42	5	5	36.1	36.1	16.396	0	8.5476	34	NA	NA	NA	93809000	69131000	86184000	70498000	86099000	76310000	75254000	72944000	98786000	45366000	NA	NA	NA	NA	NA	NA	NA	NA
AT3G05260	AT3G05260.1	AT3G05260.1 | Symbols: | NAD(P)-binding Rossmann-fold superfamily protein | chr3:1497665-1498919 REVERSE LENGTH=289	11	11	52.9	52.9	31.451	0	77.451	37	89991000	NA	520220000	120760000	110180000	177880000	NA	NA	NA	NA	NA	NA	NA	NA	NA	NA	NA	NA	Q9MA93	289	13.5
AT3G05420	AT3G05420.1;AT3G05420.2	AT3G05420.1 | Symbols: ACBP4 | acyl-CoA binding protein 4 | chr3:1561880-1567047 FORWARD LENGTH=668;AT3G05420.2 | Symbols: ACBP4 | acyl-CoA binding protein 4 | chr3:1561880-1567047 FORWARD LENGTH=669	3	3	4	4	73.074	0	3.147	15	NA	NA	NA	NA	NA	NA	NA	NA	NA	28140000	NA	27195000	NA	NA	NA	NA	NA	NA	Q9MA55	668	19.5
AT3G05530	AT3G05530.1;AT1G09100.1	AT3G05530.1 | Symbols: RPT5A, ATS6A.2 | regulatory particle triple-A ATPase 5A | chr3:1603540-1605993 FORWARD LENGTH=424;AT1G09100.1 | Symbols: RPT5B | 26S proteasome AAA-ATPase subunit RPT5B | chr1:2936675-2939258 REVERSE LENGTH=423	5	4	18.2	15.3	47.48	0	21.995	43	NA	NA	NA	31265000	65670000	37941000	53585000	45187000	NA	43356000	36027000	NA	NA	NA	NA	NA	NA	NA	Q9SEI2	424	20.5
AT3G05560	AT3G05560.3;AT3G05560.2;AT3G05560.1;AT5G27770.1	AT3G05560.3 | Symbols: | Ribosomal L22e protein family | chr3:1614641-1615204 FORWARD LENGTH=124;AT3G05560.2 | Symbols: | Ribosomal L22e protein family | chr3:1614641-1615204 FORWARD LENGTH=124;AT3G05560.1 | Symbols: | Ribosomal L22e protein family | ch	2	2	18.5	18.5	14.018	0.0007764	2.6367	10	NA	NA	NA	NA	NA	NA	32682000	NA	NA	NA	NA	NA	51979000	15928000	31269000	21409000	28519000	32146000	Q9M9W1	124	25.8
AT3G05900	AT3G05900.1	AT3G05900.1 | Symbols: | neurofilament protein-related | chr3:1761408-1763854 REVERSE LENGTH=673	49	49	78.5	78.5	73.453	0	323.31	1243	NA	NA	NA	635050000	925310000	1487600000	1699900000	1782200000	2064300000	3720900000	3330300000	5136300000	4794500000	4430800000	5159700000	7474100000	6544900000	6740000000	NA	NA	NA
AT3G06035	AT3G06035.1	AT3G06035.1 | Symbols: | Glycoprotein membrane precursor GPI-anchored | chr3:1823172-1824110 REVERSE LENGTH=200	2	2	12	12	22.053	0	29.577	23	NA	NA	NA	68996000	62184000	55084000	49550000	50783000	63072000	27124000	39645000	70370000	NA	NA	NA	NA	NA	NA	Q84MC0	200	0
AT3G06050	AT3G06050.1	AT3G06050.1 | Symbols: PRXIIF, ATPRXIIF | peroxiredoxin IIF | chr3:1826311-1827809 REVERSE LENGTH=201	10	10	68.2	68.2	21.445	0	59.632	272	485280000	521610000	516240000	600990000	636120000	632990000	542110000	545050000	610650000	555380000	535820000	431950000	464220000	535840000	576430000	510450000	470270000	461250000	Q9M7T0	201	11.4
AT3G06610	AT3G06610.1	AT3G06610.1 | Symbols: | DNA-binding enhancer protein-related | chr3:2060837-2061845 FORWARD LENGTH=115	3	3	28.7	28.7	12.795	0	10.096	75	NA	79644000	88240000	76040000	72688000	NA	73466000	74903000	90181000	80917000	94233000	81280000	51825000	89403000	82034000	80197000	103500000	72745000	NA	NA	NA
AT3G07390	AT3G07390.1	AT3G07390.1 | Symbols: AIR12 | auxin-responsive family protein | chr3:2365452-2366273 FORWARD LENGTH=273	4	4	12.8	12.8	27.926	0	10.737	127	102890000	156580000	121890000	293100000	217720000	327300000	339060000	303660000	354030000	352500000	357070000	446740000	342570000	363200000	365030000	454480000	478850000	442120000	Q94BT2	252	24.2
AT3G07470	AT3G07470.1	AT3G07470.1 | Symbols: | Protein of unknown function, DUF538 | chr3:2387291-2388343 REVERSE LENGTH=169	4	4	29.6	29.6	18.779	0	18.659	56	NA	NA	NA	NA	NA	NA	63707000	NA	NA	93098000	105610000	NA	102820000	130480000	119500000	178630000	155370000	162250000	NA	NA	NA
AT3G07660	AT3G07660.1	AT3G07660.1 | Symbols: | Kinase-related protein of unknown function (DUF1296) | chr3:2445275-2450372 REVERSE LENGTH=841	8	8	12.4	12.4	90.075	0	23.079	71	NA	NA	NA	NA	90934000	NA	143830000	135340000	133630000	151550000	138700000	120970000	94115000	101220000	114860000	108440000	93643000	102240000	NA	NA	NA
AT3G07880	AT3G07880.1	AT3G07880.1 | Symbols: SCN1 | Immunoglobulin E-set superfamily protein | chr3:2514175-2515544 FORWARD LENGTH=240	2	2	7.1	7.1	27.231	0.0090782	1.8191	9	NA	NA	NA	NA	NA	NA	29028000	35108000	NA	30959000	35445000	25955000	NA	NA	NA	NA	NA	NA	Q9SFC6	240	36.3
AT3G08770	AT3G08770.1;AT3G08770.2	AT3G08770.1 | Symbols: LTP6 | lipid transfer protein 6 | chr3:2664349-2664784 REVERSE LENGTH=113;AT3G08770.2 | Symbols: LTP6 | lipid transfer protein 6 | chr3:2664330-2664784 REVERSE LENGTH=117	2	2	19.5	19.5	11.878	0	7.5326	34	NA	NA	NA	NA	35863000	46870000	70212000	57327000	57350000	44309000	42515000	62916000	59321000	60431000	59827000	103070000	89250000	104120000	Q9LDB4	113	0
AT3G09200	AT3G09200.1;AT3G09200.2;AT3G11250.1;AT2G40010.1	AT3G09200.1 | Symbols: | Ribosomal protein L10 family protein | chr3:2823364-2825020 REVERSE LENGTH=320;AT3G09200.2 | Symbols: | Ribosomal protein L10 family protein | chr3:2823364-2825020 REVERSE LENGTH=287;AT3G11250.1 | Symbols: | Ribosomal protein L1	5	5	33.8	33.8	34.133	0	65.723	47	NA	NA	NA	45294000	26240000	35297000	60312000	77746000	44984000	32863000	51565000	120790000	129730000	42951000	51156000	57269000	58139000	69846000	Q42112	320	13.1
AT3G09260	AT3G09260.1;AT1G66270.2;AT1G66280.1;AT1G66270.1	AT3G09260.1 | Symbols: PYK10, PSR3.1, BGLU23, LEB | Glycosyl hydrolase superfamily protein | chr3:2840657-2843730 REVERSE LENGTH=524;AT1G66270.2 | Symbols: BGLU21 | Glycosyl hydrolase superfamily protein | chr1:24700110-24702995 REVERSE LENGTH=522;AT1G6628	3	3	4.8	4.8	59.72	0.0014826	2.2412	7	NA	NA	NA	NA	NA	NA	NA	NA	NA	NA	NA	NA	NA	NA	NA	20905000	NA	22198000	Q9SR37	524	2.1
AT3G09350	AT3G09350.3;AT3G09350.2;AT3G09350.1	AT3G09350.3 | Symbols: Fes1A | Fes1A | chr3:2871710-2873109 FORWARD LENGTH=327;AT3G09350.2 | Symbols: Fes1A | Fes1A | chr3:2871710-2873109 FORWARD LENGTH=327;AT3G09350.1 | Symbols: Fes1A | Fes1A | chr3:2871216-2873109 FORWARD LENGTH=363	5	5	19.9	19.9	36.184	0	12.402	9	NA	NA	NA	NA	28118000	66223000	NA	NA	NA	NA	NA	NA	NA	NA	NA	NA	NA	NA	NA	NA	NA
AT3G09500	AT3G09500.1;AT3G55170.2;AT3G55170.1	AT3G09500.1 | Symbols: | Ribosomal L29 family protein | chr3:2917047-2917895 FORWARD LENGTH=123;AT3G55170.2 | Symbols: | Ribosomal L29 family protein | chr3:20453136-20454293 REVERSE LENGTH=123;AT3G55170.1 | Symbols: | Ribosomal L29 family protein |	4	2	29.3	16.3	14.285	0	5.5082	34	NA	NA	NA	98901000	37819000	NA	59247000	52156000	39774000	40093000	38063000	147450000	94024000	35629000	43024000	NA	NA	NA	Q9SF53	123	56.9
AT3G09680	AT3G09680.1;AT5G02960.1	AT3G09680.1 | Symbols: | Ribosomal protein S12/S23 family protein | chr3:2969197-2970291 REVERSE LENGTH=142;AT5G02960.1 | Symbols: | Ribosomal protein S12/S23 family protein | chr5:693280-694396 REVERSE LENGTH=142	3	3	33.8	33.8	15.769	0	10.64	12	NA	NA	NA	NA	NA	NA	NA	NA	NA	NA	NA	NA	NA	NA	NA	23185000	24772000	23734000	Q9SF35	142	37.3
AT3G09820	AT3G09820.2;AT3G09820.1;AT5G03300.1	AT3G09820.2 | Symbols: ADK1 | adenosine kinase 1 | chr3:3012645-3014624 FORWARD LENGTH=302;AT3G09820.1 | Symbols: ADK1, ATADK1 | adenosine kinase 1 | chr3:3012122-3014624 FORWARD LENGTH=344;AT5G03300.1 | Symbols: ADK2 | adenosine kinase 2 | chr5:796573-798	8	8	34.4	34.4	33.326	0	53.245	33	NA	NA	NA	NA	NA	NA	NA	64310000	NA	65797000	56019000	66284000	109510000	NA	NA	66143000	63920000	68940000	Q9SF85	344	0
AT3G09840	AT3G09840.1;AT5G03340.1;AT3G53230.1	AT3G09840.1 | Symbols: CDC48, ATCDC48, CDC48A | cell division cycle 48 | chr3:3019494-3022832 FORWARD LENGTH=809;AT5G03340.1 | Symbols: | ATPase, AAA-type, CDC48 protein | chr5:810091-813133 REVERSE LENGTH=810;AT3G53230.1 | Symbols: | ATPase, AAA-type, C	12	12	16.7	16.7	89.392	0	136.02	49	NA	NA	NA	NA	57948000	73082000	65886000	63541000	61478000	48687000	71331000	46505000	71251000	43841000	NA	47871000	42890000	NA	P54609	809	11.5
AT3G09890	AT3G09890.1	AT3G09890.1 | Symbols: | Ankyrin repeat family protein | chr3:3032678-3034158 FORWARD LENGTH=206	5	5	30.1	30.1	22.105	0	94.669	25	NA	NA	NA	NA	NA	NA	46963000	51496000	74623000	49445000	40403000	NA	NA	NA	50841000	32715000	37268000	35621000	NA	NA	NA
AT3G09980	AT3G09980.1	AT3G09980.1 | Symbols: | Family of unknown function (DUF662) | chr3:3069358-3071145 FORWARD LENGTH=178	5	3	20.2	15.2	20.588	0	5.5259	26	NA	NA	NA	69978000	62038000	40011000	32277000	37624000	34715000	37085000	46489000	31987000	NA	NA	NA	NA	37401000	31949000	NA	NA	NA
AT3G10020	AT3G10020.1;AT3G10020.2	AT3G10020.1 | Symbols: | unknown protein; FUNCTIONS IN: molecular_function unknown; INVOLVED IN: response to oxidative stress, anaerobic respiration; LOCATED IN: cellular_component unknown; EXPRESSED IN: 23 plant structures; EXPRESSED DURING: 13 growth st	6	6	34.2	34.2	16.737	0	93.866	126	1981300000	2451900000	1421500000	514980000	343920000	571800000	142410000	190170000	194970000	175150000	135740000	176550000	181240000	191510000	171820000	358980000	287260000	279510000	NA	NA	NA
AT3G10220	AT3G10220.1	AT3G10220.1 | Symbols: | tubulin folding cofactor B | chr3:3161977-3164037 FORWARD LENGTH=243	6	6	41.6	41.6	27.33	0	73.275	25	NA	NA	NA	NA	NA	NA	58679000	98466000	47994000	60795000	75969000	73130000	NA	NA	NA	NA	NA	NA	Q67Z52	243	33.7
AT3G10650	AT3G10650.1	AT3G10650.1 | Symbols: | BEST Arabidopsis thaliana protein match is: nucleoporin-related (TAIR:AT5G20200.1); Has 61042 Blast hits to 31782 proteins in 2093 species: Archae - 202; Bacteria - 16480; Metazoa - 16017; Fungi - 12552; Plants - 1653; Viruses - 6	4	4	2.9	2.9	135.93	0	4.5022	5	NA	NA	NA	26807000	NA	45304000	NA	NA	NA	NA	NA	NA	NA	NA	NA	NA	NA	NA	NA	NA	NA
AT3G10850	AT3G10850.1	AT3G10850.1 | Symbols: GLX2-2, GLY2 | Metallo-hydrolase/oxidoreductase superfamily protein | chr3:3397756-3399522 REVERSE LENGTH=258	5	5	28.3	28.3	28.791	0	52.369	71	NA	NA	NA	NA	109150000	69262000	95352000	93512000	83259000	137580000	124010000	NA	74003000	96958000	90294000	96785000	125480000	105390000	O24496	258	20.2
AT3G10920	AT3G10920.2;AT3G10920.1	AT3G10920.2 | Symbols: MSD1 | manganese superoxide dismutase 1 | chr3:3418015-3419581 FORWARD LENGTH=230;AT3G10920.1 | Symbols: MSD1, MEE33, ATMSD1 | manganese superoxide dismutase 1 | chr3:3418015-3419581 FORWARD LENGTH=231	7	7	31.7	31.7	25.344	0	109.11	77	NA	NA	NA	NA	NA	NA	58821000	49782000	56513000	338300000	286970000	32867000	140800000	261010000	234490000	131010000	154040000	155370000	O81235	231	0
AT3G11050	AT3G11050.1	AT3G11050.1 | Symbols: ATFER2, FER2 | ferritin 2 | chr3:3463651-3465294 FORWARD LENGTH=253	3	3	13	13	28.378	0	4.4958	5	NA	NA	71941000	NA	NA	NA	NA	NA	NA	NA	NA	NA	NA	NA	NA	26131000	NA	33957000	Q9SRL5	253	20.2
AT3G11630	AT3G11630.1	AT3G11630.1 | Symbols: | Thioredoxin superfamily protein | chr3:3672189-3673937 FORWARD LENGTH=266	9	3	47	21.1	29.092	0	26.964	48	NA	NA	NA	NA	NA	NA	NA	NA	NA	95821000	98742000	NA	168720000	172090000	114980000	222320000	242420000	235650000	Q96291	266	1.9
AT3G11780	AT3G11780.1;AT3G11780.2	AT3G11780.1 | Symbols: | MD-2-related lipid recognition domain-containing protein / ML domain-containing protein | chr3:3724326-3725476 REVERSE LENGTH=153;AT3G11780.2 | Symbols: | MD-2-related lipid recognition domain-containing protein / ML domain-conta	2	2	17	17	16.805	0	26.064	23	NA	NA	NA	NA	NA	NA	32568000	29039000	25204000	67954000	85449000	NA	43212000	53460000	65492000	43268000	59284000	49494000	NA	NA	NA
AT3G12390	AT3G12390.1	AT3G12390.1 | Symbols: | Nascent polypeptide-associated complex (NAC), alpha subunit family protein | chr3:3942344-3943595 FORWARD LENGTH=203	8	4	50.7	32	21.982	0	141.92	490	679700000	537130000	695720000	1649100000	1736200000	1902900000	1643700000	1725800000	2327600000	1650000000	1085100000	2270000000	1146300000	1612500000	1451200000	266730000	348760000	493190000	Q9LHG9	203	90.1
AT3G12490	AT3G12490.1;AT3G12490.2	AT3G12490.1 | Symbols: ATCYSB, ATCYS6, CYSB | cystatin B | chr3:3960523-3961777 REVERSE LENGTH=201;AT3G12490.2 | Symbols: ATCYSB, ATCYS6, CYSB | cystatin B | chr3:3960523-3961876 REVERSE LENGTH=234	15	14	81.1	77.1	22.477	0	323.31	1048	8351700000	8277100000	9037300000	9306800000	10600000000	2831900000	6055300000	6487300000	6990900000	5215400000	5293400000	3344900000	3215800000	3649900000	3533500000	3020000000	3601800000	2650200000	Q8H0X6	234	21.4
AT3G12580	AT3G12580.1;AT1G56410.1	AT3G12580.1 | Symbols: HSP70, ATHSP70 | heat shock protein 70 | chr3:3991487-3993689 REVERSE LENGTH=650;AT1G56410.1 | Symbols: ERD2, HSP70T-1 | heat shock protein 70 (Hsp 70) family protein | chr1:21117147-21119241 FORWARD LENGTH=617	15	5	30.8	11.4	71.101	0	80.288	58	NA	85454000	95082000	139750000	226110000	368370000	152030000	150240000	149320000	NA	90792000	165320000	113360000	NA	NA	NA	51570000	NA	Q9LHA8	650	26.6
AT3G12780	AT3G12780.1	AT3G12780.1 | Symbols: PGK1 | phosphoglycerate kinase 1 | chr3:4061127-4063140 REVERSE LENGTH=481	16	8	45.1	24.1	50.111	0	87.515	241	119510000	123560000	258330000	159740000	119320000	611130000	182500000	235110000	181400000	214500000	240540000	476430000	689800000	341700000	317600000	675480000	558920000	713290000	Q9LD57	481	7.1
AT3G12960	AT3G12960.1	AT3G12960.1 | Symbols: | unknown protein; Has 44 Blast hits to 44 proteins in 14 species: Archae - 0; Bacteria - 0; Metazoa - 0; Fungi - 0; Plants - 44; Viruses - 0; Other Eukaryotes - 0 (source: NCBI BLink). | chr3:4136546-4136806 FORWARD LENGTH=86	6	6	61.6	61.6	9.4643	0	232.34	217	2987100000	3060900000	3014500000	1028400000	612380000	930600000	254680000	462160000	259520000	238040000	238020000	274690000	90812000	164080000	137290000	111130000	80430000	88471000	NA	NA	NA
AT3G13200	AT3G13200.1	AT3G13200.1 | Symbols: EMB2769 | Cwf15 / Cwc15 cell cycle control family protein | chr3:4242239-4243976 FORWARD LENGTH=230	3	3	14.3	14.3	27.032	0	6.4123	19	NA	NA	NA	NA	NA	NA	49285000	74974000	46946000	55797000	68254000	48565000	NA	NA	NA	NA	NA	NA	NA	NA	NA
AT3G13235	AT3G13235.3;AT3G13235.2;AT3G13235.1	AT3G13235.3 | Symbols: | ubiquitin family protein | chr3:4271492-4274348 REVERSE LENGTH=413;AT3G13235.2 | Symbols: | ubiquitin family protein | chr3:4271492-4274348 REVERSE LENGTH=414;AT3G13235.1 | Symbols: | ubiquitin family protein | chr3:4271492-4274	11	11	31.5	31.5	45.272	0	44.117	39	NA	NA	NA	NA	93693000	NA	56770000	70875000	60755000	90137000	86630000	NA	83926000	94476000	83180000	72191000	81078000	59770000	Q1EBV4	414	36.2
AT3G13460	AT3G13460.1;AT3G13460.3;AT3G13460.2;AT3G13460.4	AT3G13460.1 | Symbols: ECT2 | evolutionarily conserved C-terminal region 2 | chr3:4385274-4388220 REVERSE LENGTH=667;AT3G13460.3 | Symbols: ECT2 | evolutionarily conserved C-terminal region 2 | chr3:4385934-4388220 REVERSE LENGTH=508;AT3G13460.2 | Symbols:	6	6	12.3	12.3	72.474	0	24.008	33	NA	NA	NA	99091000	NA	112110000	58915000	58637000	35289000	47048000	49344000	106460000	52447000	47292000	NA	NA	NA	NA	Q9LJE5	667	55
AT3G13470	AT3G13470.1	AT3G13470.1 | Symbols: | TCP-1/cpn60 chaperonin family protein | chr3:4389685-4392624 FORWARD LENGTH=596	29	3	53.4	4.9	63.341	0	7.4248	57	NA	NA	NA	NA	99388000	NA	160730000	119560000	74113000	175010000	172950000	88486000	251020000	214770000	204330000	279140000	281210000	200260000	Q9LJE4	596	10.2
AT3G13860	AT3G13860.1	AT3G13860.1 | Symbols: HSP60-3A | heat shock protein 60-3A | chr3:4561704-4565133 REVERSE LENGTH=572	5	5	10.3	10.3	60.466	0	5.3017	8	NA	NA	NA	NA	NA	NA	NA	NA	NA	21679000	19477000	NA	NA	NA	NA	NA	NA	NA	Q93ZM7	572	7.7
AT3G13920	AT3G13920.1;AT3G13920.3;AT3G13920.4;AT3G13920.2;AT1G54270.1;AT1G72730.1;AT1G54270.2	AT3G13920.1 | Symbols: EIF4A1, RH4, TIF4A1 | eukaryotic translation initiation factor 4A1 | chr3:4592635-4594128 REVERSE LENGTH=412;AT3G13920.3 | Symbols: EIF4A1, RH4, TIF4A1 | eukaryotic translation initiation factor 4A1 | chr3:4592635-4594094 REVERSE LEN	7	7	22.3	22.3	46.704	0	35.583	30	NA	NA	NA	NA	NA	NA	42195000	51235000	NA	NA	40936000	49249000	125180000	NA	NA	NA	NA	NA	P41376	412	7.5
AT3G13930	AT3G13930.1	AT3G13930.1 | Symbols: | Dihydrolipoamide acetyltransferase, long form protein | chr3:4596240-4600143 FORWARD LENGTH=539	10	10	22.3	22.3	58.467	0	13.839	35	NA	NA	NA	NA	NA	NA	59958000	54034000	NA	76849000	72750000	NA	54424000	58513000	NA	48894000	47743000	46966000	Q8RWN9	539	20
AT3G14067	AT3G14067.1	AT3G14067.1 | Symbols: | Subtilase family protein | chr3:4658421-4660754 REVERSE LENGTH=777	6	6	9.5	9.5	81.816	0	39.104	30	NA	NA	NA	NA	NA	NA	NA	NA	NA	49240000	51394000	45110000	75287000	67724000	61067000	92853000	71370000	82958000	Q9LVJ1	777	1.3
AT3G14310	AT3G14310.1	AT3G14310.1 | Symbols: ATPME3, PME3 | pectin methylesterase 3 | chr3:4772214-4775095 REVERSE LENGTH=592	2	2	5.9	5.9	64.255	0	17.081	23	NA	NA	NA	NA	NA	NA	NA	NA	NA	73495000	99495000	NA	NA	NA	NA	NA	NA	NA	O49006	592	10.5
AT3G14415	AT3G14415.3;AT3G14415.1;AT3G14415.2	AT3G14415.3 | Symbols: | Aldolase-type TIM barrel family protein | chr3:4818667-4820748 FORWARD LENGTH=367;AT3G14415.1 | Symbols: | Aldolase-type TIM barrel family protein | chr3:4818667-4820748 FORWARD LENGTH=367;AT3G14415.2 | Symbols: | Aldolase-type	6	2	15.5	3	40.306	0	11.632	26	NA	NA	NA	NA	NA	NA	NA	NA	NA	NA	NA	NA	184110000	37392000	NA	110530000	52325000	96074000	Q9LRS0	367	0
AT3G15190	AT3G15190.1	AT3G15190.1 | Symbols: | chloroplast 30S ribosomal protein S20, putative | chr3:5116216-5117412 FORWARD LENGTH=202	5	5	17.3	17.3	21.826	0	32.58	114	NA	NA	NA	NA	NA	NA	173270000	140980000	175020000	311530000	209020000	311500000	319130000	429740000	418410000	520450000	387260000	506400000	Q9ASV6	202	6.9
AT3G15260	AT3G15260.2;AT3G15260.1	AT3G15260.2 | Symbols: | Protein phosphatase 2C family protein | chr3:5138842-5140242 FORWARD LENGTH=289;AT3G15260.1 | Symbols: | Protein phosphatase 2C family protein | chr3:5138842-5140242 FORWARD LENGTH=289	8	8	29.8	29.8	31.63	0	21.404	53	NA	NA	85188000	NA	190510000	NA	99162000	106950000	115060000	130140000	140870000	75833000	NA	107150000	76248000	106220000	114860000	114460000	Q9LDA7	289	13.1
AT3G15280	AT3G15280.1	AT3G15280.1 | Symbols: | unknown protein; FUNCTIONS IN: molecular_function unknown; LOCATED IN: mitochondrion; EXPRESSED IN: 8 plant structures; EXPRESSED DURING: L mature pollen stage, 4 anthesis, petal differentiation and expansion stage; Has 36 Blast h	8	8	50	50	16.083	0	323.31	262	1287500000	1003300000	1237200000	1167200000	1161100000	1354300000	971610000	892810000	1293300000	619810000	646140000	834200000	471670000	543360000	528960000	438490000	397140000	397660000	NA	NA	NA
AT3G15360	AT3G15360.1	AT3G15360.1 | Symbols: ATHM4, TRX-M4, ATM4 | thioredoxin M-type 4 | chr3:5188448-5189457 FORWARD LENGTH=193	7	7	34.7	34.7	21.172	0	82.238	279	NA	NA	71626000	230870000	184160000	349920000	454260000	491310000	357410000	731160000	893910000	1214400000	1609300000	1098700000	1488300000	2421800000	2294800000	1919200000	Q9SEU6	193	25.9
AT3G15640	AT3G15640.2;AT3G15640.1	AT3G15640.2 | Symbols: | Rubredoxin-like superfamily protein | chr3:5299273-5301371 FORWARD LENGTH=175;AT3G15640.1 | Symbols: | Rubredoxin-like superfamily protein | chr3:5299273-5301371 FORWARD LENGTH=176	3	2	14.3	14.3	19.316	0	77.667	79	NA	NA	NA	107000000	109740000	93357000	171580000	182530000	162150000	111120000	97432000	147960000	NA	98305000	102630000	NA	NA	NA	Q9LW15	176	31.3
AT3G15660	AT3G15660.2;AT3G15660.1	AT3G15660.2 | Symbols: ATGRX4, GRX4 | glutaredoxin 4 | chr3:5308134-5309383 REVERSE LENGTH=169;AT3G15660.1 | Symbols: ATGRX4, GRX4 | glutaredoxin 4 | chr3:5308134-5309383 REVERSE LENGTH=169	5	5	32.5	32.5	18.734	0	104.5	81	NA	NA	NA	122100000	165730000	131460000	172220000	177470000	181130000	209940000	232670000	192080000	216040000	237490000	238040000	213660000	228580000	253700000	Q8LBK6	169	54.4
AT3G15670	AT3G15670.1	AT3G15670.1 | Symbols: | Late embryogenesis abundant protein (LEA) family protein | chr3:5310141-5310901 REVERSE LENGTH=225	19	19	66.7	66.7	24.186	0	323.31	624	56700000000	50300000000	49100000000	26600000000	22200000000	27600000000	7591300000	8798500000	9891800000	5957200000	4536600000	4599900000	1743600000	2115700000	2304800000	1212500000	1383600000	1246200000	Q9LW12	225	100
AT3G15790	AT3G15790.1	AT3G15790.1 | Symbols: MBD11, ATMBD11 | methyl-CPG-binding domain 11 | chr3:5343209-5344386 FORWARD LENGTH=254	8	7	35.8	33.1	27.642	0	280.8	55	169200000	199940000	185340000	204100000	118860000	225640000	121920000	NA	168930000	NA	67386000	120310000	NA	NA	NA	NA	NA	NA	Q9LW00	254	100
AT3G15950	AT3G15950.1;AT3G15950.2	AT3G15950.1 | Symbols: NAI2 | DNA topoisomerase-related | chr3:5397783-5402610 REVERSE LENGTH=772;AT3G15950.2 | Symbols: NAI2 | DNA topoisomerase-related | chr3:5397783-5402610 REVERSE LENGTH=734	28	27	41.8	40	85.015	0	323.31	611	NA	NA	NA	569510000	646120000	1528600000	2296200000	2262400000	2184600000	2528100000	2107400000	4404700000	2660000000	2456700000	2980600000	3266800000	2970600000	2975400000	Q9LSB4	772	67.6
AT3G15970	AT3G15970.1	AT3G15970.1 | Symbols: | NUP50 (Nucleoporin 50 kDa) protein | chr3:5408982-5410379 REVERSE LENGTH=465	10	10	28.6	28.6	49.108	0	36.625	48	NA	NA	NA	137290000	128280000	173630000	68402000	65765000	NA	62904000	55228000	119640000	42694000	36451000	NA	42140000	48724000	42814000	Q9LW88	465	96.8
AT3G16080	AT3G16080.1;AT1G52300.1;AT1G15250.1	AT3G16080.1 | Symbols: | Zinc-binding ribosomal protein family protein | chr3:5454892-5455677 FORWARD LENGTH=95;AT1G52300.1 | Symbols: | Zinc-binding ribosomal protein family protein | chr1:19475213-19476152 REVERSE LENGTH=95;AT1G15250.1 | Symbols: | Zi	4	4	38.9	38.9	10.771	0	5.9181	26	NA	NA	NA	168760000	NA	NA	115900000	NA	52852000	NA	NA	NA	NA	NA	NA	65879000	53632000	93307000	Q8LEM8	95	100
AT3G16400	AT3G16400.2;AT3G16400.1	AT3G16400.2 | Symbols: ATMLP-470 | nitrile specifier protein 1 | chr3:5566516-5568330 FORWARD LENGTH=470;AT3G16400.1 | Symbols: ATMLP-470, NSP1, ATNSP1 | nitrile specifier protein 1 | chr3:5566516-5568330 FORWARD LENGTH=470	9	2	26.2	7	51.669	0	51.081	34	NA	NA	NA	NA	NA	NA	NA	NA	NA	NA	NA	63184000	263880000	NA	39614000	84258000	57098000	99956000	Q9SDM9	470	2.1
AT3G16420	AT3G16420.3;AT3G16420.2;AT3G16420.1	AT3G16420.3 | Symbols: PBP1 | PYK10-binding protein 1 | chr3:5579560-5580674 FORWARD LENGTH=298;AT3G16420.2 | Symbols: PBP1 | PYK10-binding protein 1 | chr3:5579560-5580674 FORWARD LENGTH=298;AT3G16420.1 | Symbols: PBP1, JAL30 | PYK10-binding protein 1 | c	20	20	85.9	85.9	32.158	0	323.31	757	NA	NA	NA	454730000	1340100000	552950000	2263600000	2294100000	2178100000	3511800000	3780700000	796820000	2263200000	2900100000	2914500000	1681600000	2547900000	1910000000	O04314	298	4.7
AT3G16450	AT3G16450.3;AT3G16450.2;AT3G16450.1	AT3G16450.3 | Symbols: | Mannose-binding lectin superfamily protein | chr3:5588593-5589792 FORWARD LENGTH=300;AT3G16450.2 | Symbols: | Mannose-binding lectin superfamily protein | chr3:5588593-5589792 FORWARD LENGTH=300;AT3G16450.1 | Symbols: | Mannose-	7	6	35	32.7	32.022	0	25.457	16	NA	NA	NA	NA	NA	NA	NA	NA	NA	NA	NA	NA	NA	68340000	77871000	NA	NA	NA	O04311	300	4.3
AT3G16640	AT3G16640.1	AT3G16640.1 | Symbols: TCTP | translationally controlled tumor protein | chr3:5669709-5670729 REVERSE LENGTH=168	5	5	33.3	33.3	18.91	0	10.375	50	NA	NA	NA	55895000	48097000	245580000	53958000	36999000	NA	66434000	68643000	53285000	88653000	65110000	62257000	NA	43071000	48035000	P31265	168	8.9
AT3G17210	AT3G17210.1	AT3G17210.1 | Symbols: ATHS1, HS1 | heat stable protein 1 | chr3:5882318-5882896 FORWARD LENGTH=109	2	2	27.5	27.5	12.184	0	7.2243	17	NA	NA	NA	NA	NA	NA	NA	36916000	NA	53612000	62855000	NA	NA	NA	NA	NA	NA	NA	Q9LUV2	109	4.6
AT3G17390	AT3G17390.1	AT3G17390.1 | Symbols: MTO3, SAMS3, MAT4 | S-adenosylmethionine synthetase family protein | chr3:5952484-5953665 REVERSE LENGTH=393	10	5	26.5	12.5	42.795	0	195.67	226	NA	NA	NA	133030000	NA	561200000	201550000	188920000	170630000	152360000	167230000	469320000	248670000	183230000	167810000	202510000	191320000	178610000	Q9LUT2	393	2.5
AT3G17520	AT3G17520.1	AT3G17520.1 | Symbols: | Late embryogenesis abundant protein (LEA) family protein | chr3:5999462-6000358 REVERSE LENGTH=298	27	27	60.1	60.1	32.559	0	323.31	1177	22000000000	19400000000	21000000000	14300000000	10500000000	14300000000	7689200000	7002700000	8640100000	6067300000	5569200000	8277300000	3732500000	3840100000	4109800000	2984400000	3253200000	3205100000	NA	NA	NA
AT3G18420	AT3G18420.1	AT3G18420.1 | Symbols: | Protein prenylyltransferase superfamily protein | chr3:6324771-6325721 REVERSE LENGTH=316	3	3	15.5	15.5	35.63	0	17.547	25	NA	NA	NA	38083000	NA	104300000	42161000	47828000	35612000	57958000	55591000	68881000	38362000	42763000	NA	NA	NA	NA	Q9LS48	316	0
AT3G18780	AT3G18780.1;AT3G18780.2;AT1G49240.1	AT3G18780.1 | Symbols: ACT2, DER1, LSR2, ENL2 | actin 2 | chr3:6475535-6476728 FORWARD LENGTH=371;AT3G18780.2 | Symbols: ACT2, DER1, LSR2, ENL2 | actin 2 | chr3:6475535-6476832 FORWARD LENGTH=377;AT1G49240.1 | Symbols: ACT8 | actin 8 | chr1:18216539-182179	5	2	17.8	7.8	41.232	0	12.787	39	NA	NA	NA	53731000	NA	193280000	51563000	102840000	NA	109430000	112700000	282300000	186820000	NA	NA	NA	110880000	NA	Q96292	377	0
AT3G19390	AT3G19390.1	AT3G19390.1 | Symbols: | Granulin repeat cysteine protease family protein | chr3:6723024-6724768 FORWARD LENGTH=452	4	4	15.5	15.5	49.307	0	113.14	43	NA	NA	NA	NA	NA	NA	NA	NA	NA	89141000	98736000	NA	62623000	113060000	102800000	103660000	124320000	104700000	Q9LT78	452	9.7
AT3G19910	AT3G19910.1	AT3G19910.1 | Symbols: | RING/U-box superfamily protein | chr3:6926497-6929324 FORWARD LENGTH=340	2	2	7.9	7.9	37.262	0	7.1718	4	NA	NA	NA	NA	NA	NA	NA	NA	NA	25760000	24870000	NA	NA	NA	NA	NA	NA	NA	Q9LT17	340	90.3
AT3G20390	AT3G20390.1	AT3G20390.1 | Symbols: | endoribonuclease L-PSP family protein | chr3:7110227-7111695 REVERSE LENGTH=187	11	11	62.6	62.6	19.816	0	115.31	323	742440000	761610000	829570000	1352200000	839570000	2127700000	1056500000	923570000	1211700000	569330000	565790000	2401400000	571320000	460010000	484640000	1282100000	755550000	1066900000	Q94JQ4	187	0
AT3G21370	AT3G21370.1	AT3G21370.1 | Symbols: BGLU19 | beta glucosidase 19 | chr3:7524286-7527579 REVERSE LENGTH=527	13	13	35.5	35.5	60.014	0	193.25	49	333020000	225940000	1049100000	NA	NA	46008000	NA	NA	NA	NA	NA	NA	NA	NA	NA	NA	NA	NA	Q9LIF9	527	4
AT3G21380	AT3G21380.1	AT3G21380.1 | Symbols: | Mannose-binding lectin superfamily protein | chr3:7528478-7530457 FORWARD LENGTH=460	22	21	67.4	65.9	49.723	0	323.31	230	2730000000	2506700000	3804300000	343220000	722390000	586440000	149240000	111000000	161690000	NA	NA	NA	NA	NA	NA	NA	NA	NA	Q9LIF8	460	23
AT3G21720	AT3G21720.1	AT3G21720.1 | Symbols: ICL | isocitrate lyase | chr3:7652789-7655873 REVERSE LENGTH=576	14	14	32.5	32.5	64.244	0	323.31	222	NA	NA	NA	197930000	227230000	166180000	495610000	459850000	363480000	210740000	286680000	399240000	1095600000	249160000	326560000	278080000	201720000	389130000	P28297	576	6.1
AT3G22490	AT3G22490.1	AT3G22490.1 | Symbols: | Seed maturation protein | chr3:7969785-7970738 REVERSE LENGTH=262	13	13	45.4	45.4	26.743	0	323.31	219	4535100000	4260000000	4476100000	870100000	588980000	784600000	106230000	179570000	176720000	37203000	43905000	83880000	NA	NA	NA	NA	NA	NA	Q9LJ97	262	24
AT3G22500	AT3G22500.1	AT3G22500.1 | Symbols: ATECP31 | Seed maturation protein | chr3:7971920-7972865 REVERSE LENGTH=256	15	15	71.5	71.5	26.779	0	323.31	458	18500000000	18600000000	18400000000	937350000	728810000	593910000	201190000	181800000	230460000	NA	93491000	222230000	NA	NA	NA	NA	NA	NA	Q9LJ95	256	48.8
AT3G22640	AT3G22640.1	AT3G22640.1 | Symbols: PAP85 | cupin family protein | chr3:8011902-8013883 REVERSE LENGTH=486	33	33	72	72	55.062	0	323.31	1934	125000000000	164000000000	70000000000	59600000000	43400000000	12300000000	18000000000	16400000000	25400000000	3619500000	2841400000	5875700000	1816100000	1590000000	1571500000	1250000000	1200000000	1356600000	Q9LUJ7	486	24.5
AT3G23450	AT3G23450.1	AT3G23450.1 | Symbols: | unknown protein; FUNCTIONS IN: molecular_function unknown; INVOLVED IN: biological_process unknown; LOCATED IN: endomembrane system; EXPRESSED IN: 14 plant structures; EXPRESSED DURING: 8 growth stages; Has 694543 Blast hits to 47	4	4	55.8	55.8	34.865	0	10.17	33	NA	NA	NA	NA	NA	NA	86506000	140660000	95925000	253410000	223610000	296720000	171240000	175110000	142880000	302940000	246890000	282640000	NA	NA	NA
AT3G23490	AT3G23490.1	AT3G23490.1 | Symbols: CYN | cyanase | chr3:8423238-8424415 REVERSE LENGTH=168	7	7	44	44	18.592	0	247.77	153	174080000	220620000	223340000	190570000	294760000	143010000	214700000	245260000	227960000	210720000	292700000	63562000	177060000	158720000	180850000	200130000	213370000	186850000	O22683	168	19.6
AT3G23570	AT3G23570.1	AT3G23570.1 | Symbols: | alpha/beta-Hydrolases superfamily protein | chr3:8458052-8459608 REVERSE LENGTH=239	3	3	20.1	20.1	26.53	0	34.313	30	NA	NA	NA	NA	NA	NA	NA	NA	NA	NA	NA	NA	17486000	38379000	21285000	13626000	35932000	NA	NA	NA	NA
AT3G23600	AT3G23600.2;AT3G23600.1	AT3G23600.2 | Symbols: | alpha/beta-Hydrolases superfamily protein | chr3:8473833-8475655 FORWARD LENGTH=236;AT3G23600.1 | Symbols: | alpha/beta-Hydrolases superfamily protein | chr3:8473833-8475655 FORWARD LENGTH=239	3	3	19.5	19.5	25.563	0	8.1067	10	NA	NA	NA	NA	NA	NA	NA	NA	NA	NA	NA	NA	NA	57745000	46077000	NA	NA	NA	NA	NA	NA
AT3G23830	AT3G23830.2;AT3G23830.1	AT3G23830.2 | Symbols: GR-RBP4, GRP4 | glycine-rich RNA-binding protein 4 | chr3:8606762-8607677 REVERSE LENGTH=136;AT3G23830.1 | Symbols: GR-RBP4, GRP4 | glycine-rich RNA-binding protein 4 | chr3:8606762-8607677 REVERSE LENGTH=136	5	5	46.3	46.3	14.128	0	50.446	100	NA	NA	NA	335060000	249790000	282520000	239390000	243500000	297660000	172180000	197200000	183680000	79604000	107810000	88297000	NA	61251000	NA	Q9LIS2	136	42.6
AT3G23990	AT3G23990.1	AT3G23990.1 | Symbols: HSP60, HSP60-3B | heat shock protein 60 | chr3:8669013-8672278 FORWARD LENGTH=577	14	6	29.5	15.6	61.28	0	64.674	179	NA	NA	58784000	243490000	235430000	203950000	329830000	335960000	255050000	282740000	360610000	388010000	314130000	233100000	217020000	261970000	250720000	246700000	P29197	577	8.1
AT3G25220	AT3G25220.1	AT3G25220.1 | Symbols: FKBP15-1 | FK506-binding protein 15 kD-1 | chr3:9182691-9184463 FORWARD LENGTH=153	5	4	51.6	51.6	16.355	0	175.44	110	NA	83506000	93914000	161120000	163830000	210900000	182800000	164330000	169440000	187060000	181940000	331310000	91168000	171420000	169490000	109540000	154760000	NA	Q38935	153	9.8
AT3G25230	AT3G25230.1;AT3G25230.2	AT3G25230.1 | Symbols: ROF1, ATFKBP62, FKBP62 | rotamase FKBP 1 | chr3:9188257-9191137 FORWARD LENGTH=551;AT3G25230.2 | Symbols: ROF1, ATFKBP62, FKBP62 | rotamase FKBP 1 | chr3:9188257-9191175 FORWARD LENGTH=562	14	14	27	27	61.452	0	86.886	234	NA	NA	NA	328180000	636220000	434240000	575070000	524300000	520230000	421090000	403310000	298880000	387600000	406810000	488820000	420570000	439870000	396440000	Q38931	551	7.8
AT3G25520	AT3G25520.1;AT3G25520.2;AT5G39740.2;AT5G39740.1	AT3G25520.1 | Symbols: ATL5, PGY3, OLI5, RPL5A | ribosomal protein L5 | chr3:9269573-9271327 REVERSE LENGTH=301;AT3G25520.2 | Symbols: ATL5 | ribosomal protein L5 | chr3:9269573-9270434 REVERSE LENGTH=190;AT5G39740.2 | Symbols: RPL5B | ribosomal protein L5	3	3	13	13	34.358	0	24.169	32	NA	NA	NA	NA	NA	NA	45458000	NA	NA	NA	22635000	33717000	95734000	NA	NA	30415000	27129000	48376000	Q8LBI1	301	22.3
AT3G25920	AT3G25920.1	AT3G25920.1 | Symbols: RPL15 | ribosomal protein L15 | chr3:9491268-9492558 REVERSE LENGTH=277	3	3	13.7	13.7	29.707	0	8.2695	12	NA	NA	NA	NA	NA	NA	NA	NA	NA	NA	NA	NA	30914000	NA	NA	31036000	NA	30857000	P25873	277	37.5
AT3G26060	AT3G26060.1;AT3G26060.2	AT3G26060.1 | Symbols: ATPRX Q | Thioredoxin superfamily protein | chr3:9524807-9526123 FORWARD LENGTH=216;AT3G26060.2 | Symbols: ATPRX Q | Thioredoxin superfamily protein | chr3:9524807-9526123 FORWARD LENGTH=217	7	7	45.8	45.8	23.678	0	162.75	72	586490000	855890000	935760000	16743000	NA	29664000	NA	NA	NA	NA	NA	NA	NA	NA	NA	44886000	NA	28378000	Q9LU86	216	29.2
AT3G26400	AT3G26400.1	AT3G26400.1 | Symbols: EIF4B1 | eukaryotic translation initiation factor 4B1 | chr3:9666616-9669081 FORWARD LENGTH=532	13	10	27.4	22.4	57.719	0	92.242	46	NA	NA	NA	NA	NA	NA	42214000	55855000	51931000	47832000	46353000	48156000	52877000	54447000	32475000	52646000	45922000	44448000	Q9LIN5	532	100
AT3G26450	AT3G26450.1	AT3G26450.1 | Symbols: | Polyketide cyclase/dehydrase and lipid transport superfamily protein | chr3:9681593-9683299 REVERSE LENGTH=152	2	2	11.8	11.8	17.791	0	25.835	14	NA	NA	NA	NA	NA	NA	NA	NA	NA	NA	NA	NA	NA	NA	NA	32163000	35609000	NA	NA	NA	NA
AT3G26650	AT3G26650.1	AT3G26650.1 | Symbols: GAPA, GAPA-1 | glyceraldehyde 3-phosphate dehydrogenase A subunit | chr3:9795226-9796848 FORWARD LENGTH=396	13	4	42.4	14.4	42.489	0	100.64	86	NA	NA	NA	NA	NA	NA	NA	NA	NA	NA	23746000	34651000	411380000	54884000	85684000	279770000	141430000	374800000	P25856	396	5.1
AT3G26740	AT3G26740.1	AT3G26740.1 | Symbols: CCL | CCR-like | chr3:9827868-9828461 FORWARD LENGTH=141	3	3	31.2	31.2	15.314	0	13.735	14	NA	NA	NA	NA	NA	NA	NA	NA	NA	NA	NA	NA	76883000	63232000	NA	96623000	53562000	77259000	Q96500	141	44.7
AT3G27310	AT3G27310.1	AT3G27310.1 | Symbols: PUX1 | plant UBX domain-containing protein 1 | chr3:10087360-10089077 REVERSE LENGTH=251	3	3	23.5	23.5	28.502	0	8.2982	19	NA	NA	NA	46178000	46793000	37578000	NA	30563000	40634000	NA	NA	NA	NA	NA	NA	NA	NA	NA	Q9LK22	251	52.6
AT3G27660	AT3G27660.1	AT3G27660.1 | Symbols: OLEO4, OLE3 | oleosin 4 | chr3:10243851-10244821 FORWARD LENGTH=191	3	3	20.9	20.9	20.313	0	64.776	25	187420000	NA	241720000	130980000	84349000	NA	NA	NA	NA	NA	NA	NA	NA	NA	NA	NA	NA	NA	Q42431	191	41.4
AT3G27850	AT3G27850.1;AT3G27830.1	AT3G27850.1 | Symbols: RPL12-C | ribosomal protein L12-C | chr3:10324905-10325468 FORWARD LENGTH=187;AT3G27830.1 | Symbols: RPL12-A, RPL12 | ribosomal protein L12-A | chr3:10318576-10319151 FORWARD LENGTH=191	8	8	51.3	51.3	19.682	0	121.82	644	NA	NA	NA	981330000	1018900000	728840000	2469200000	2539700000	2108200000	5596800000	5379800000	3890900000	7697200000	7918200000	7710900000	9328600000	11000000000	10700000000	P36212	187	32.1
AT3G28940	AT3G28940.1	AT3G28940.1 | Symbols: | AIG2-like (avirulence induced gene) family protein | chr3:10968324-10969311 REVERSE LENGTH=169	6	6	29	29	19.465	0	47.409	36	NA	NA	NA	23844000	75847000	NA	43916000	43304000	35143000	53968000	55720000	NA	42305000	47106000	56988000	46882000	54634000	45060000	Q9MBH2	169	14.8
AT3G32980	AT3G32980.1	AT3G32980.1 | Symbols: | Peroxidase superfamily protein | chr3:13526404-13529949 REVERSE LENGTH=352	6	4	21	15.9	38.847	0	27.32	155	NA	NA	NA	NA	NA	NA	47508000	NA	NA	114080000	133130000	88230000	172040000	159470000	182620000	263290000	223640000	193560000	Q9LHB9	352	0
AT3G44110	AT3G44110.2;AT5G22060.1;AT3G44110.1	AT3G44110.2 | Symbols: ATJ3, ATJ | DNAJ homologue 3 | chr3:15869179-15871059 REVERSE LENGTH=343;AT5G22060.1 | Symbols: ATJ2, J2 | DNAJ homologue 2 | chr5:7303798-7305668 REVERSE LENGTH=419;AT3G44110.1 | Symbols: ATJ3, ATJ | DNAJ homologue 3 | chr3:15869115	3	3	10.5	10.5	37.674	0	11.007	21	NA	NA	NA	NA	NA	NA	34504000	33254000	25736000	NA	NA	52734000	NA	NA	NA	NA	NA	NA	Q94AW8	420	34.3
AT3G44590	AT3G44590.2;AT3G44590.1	AT3G44590.2 | Symbols: | 60S acidic ribosomal protein family | chr3:16163983-16164658 FORWARD LENGTH=111;AT3G44590.1 | Symbols: | 60S acidic ribosomal protein family | chr3:16163983-16164658 FORWARD LENGTH=111	4	4	55.9	55.9	11.015	0	60.863	93	NA	NA	NA	235950000	236580000	100860000	340110000	344320000	375020000	255910000	230620000	368620000	217410000	214710000	177900000	197750000	221750000	201120000	Q9LXM8	111	82
AT3G44890	AT3G44890.1	AT3G44890.1 | Symbols: RPL9 | ribosomal protein L9 | chr3:16386505-16387963 FORWARD LENGTH=197	4	4	21.3	21.3	22.134	0	6.32	10	NA	NA	NA	NA	NA	NA	NA	NA	NA	9850000	10141000	20351000	NA	NA	NA	NA	NA	NA	P25864	197	16.2
AT3G45190	AT3G45190.1	AT3G45190.1 | Symbols: | SIT4 phosphatase-associated family protein | chr3:16541994-16548161 REVERSE LENGTH=789	3	3	4.9	4.9	87.639	0	39.066	28	NA	NA	NA	NA	NA	NA	NA	NA	NA	NA	NA	75433000	63234000	52370000	62829000	65287000	57785000	47320000	NA	NA	NA
AT3G45310	AT3G45310.2;AT3G45310.1	AT3G45310.2 | Symbols: | Cysteine proteinases superfamily protein | chr3:16628704-16630473 REVERSE LENGTH=357;AT3G45310.1 | Symbols: | Cysteine proteinases superfamily protein | chr3:16628704-16630473 REVERSE LENGTH=358	6	4	23.2	19.9	39.484	0	54.911	140	NA	NA	NA	169790000	356610000	204150000	485290000	510650000	536410000	538820000	509980000	205630000	351580000	425000000	352180000	358110000	426910000	364500000	Q8RWQ9	358	4.5
AT3G46230	AT3G46230.1	AT3G46230.1 | Symbols: ATHSP17.4, HSP17.4 | heat shock protein 17.4 | chr3:16984263-16984733 REVERSE LENGTH=156	12	8	70.5	57.1	17.439	0	155.74	393	3823500000	2658200000	5088200000	7045900000	6368800000	5630700000	2758300000	2720800000	3285400000	1078500000	950360000	922670000	94564000	201450000	160310000	NA	NA	NA	P19036	156	54.5
AT3G46940	AT3G46940.1	AT3G46940.1 | Symbols: DUT1 | DUTP-PYROPHOSPHATASE-LIKE 1 | chr3:17288367-17288867 REVERSE LENGTH=166	3	3	31.3	31.3	17.557	0	31.595	49	NA	NA	NA	53631000	56021000	59778000	68805000	74485000	82280000	69089000	NA	78034000	48585000	56008000	62397000	62830000	52578000	50022000	Q9STG6	166	20.5
AT3G47070	AT3G47070.1	AT3G47070.1 | Symbols: | LOCATED IN: thylakoid, chloroplast thylakoid membrane, chloroplast, chloroplast envelope; EXPRESSED IN: 22 plant structures; EXPRESSED DURING: 13 growth stages; CONTAINS InterPro DOMAIN/s: Thylakoid soluble phosphoprotein TSP9 (In	3	3	34	34	10.53	0	7.5002	39	NA	NA	NA	NA	NA	NA	NA	NA	NA	76092000	64033000	96907000	111650000	113880000	NA	336030000	212330000	247990000	NA	NA	NA
AT3G47650	AT3G47650.1	AT3G47650.1 | Symbols: | DnaJ/Hsp40 cysteine-rich domain superfamily protein | chr3:17569576-17570262 FORWARD LENGTH=136	3	3	40.4	40.4	14.546	0	66.267	63	NA	NA	NA	NA	NA	NA	NA	NA	NA	101800000	228130000	199610000	241860000	233550000	NA	252050000	280640000	273350000	Q9SN73	136	0
AT3G48050	AT3G48050.2;AT3G48050.1;AT3G48060.1	AT3G48050.2 | Symbols: | BAH domain ;TFIIS helical bundle-like domain | chr3:17734270-17739412 REVERSE LENGTH=1613;AT3G48050.1 | Symbols: | BAH domain ;TFIIS helical bundle-like domain | chr3:17734270-17739412 REVERSE LENGTH=1613;AT3G48060.1 | Symbols:	3	3	1.8	1.8	171.94	0.0077684	1.9297	5	NA	NA	NA	NA	NA	NA	NA	NA	NA	67687000	88415000	41094000	NA	NA	NA	NA	NA	NA	NA	NA	NA
AT3G48350	AT3G48350.1	AT3G48350.1 | Symbols: | Cysteine proteinases superfamily protein | chr3:17905752-17907370 FORWARD LENGTH=364	3	3	10.4	10.4	40.97	0	28.916	34	NA	NA	NA	NA	NA	NA	NA	41180000	NA	53243000	50280000	72885000	61780000	65478000	52723000	61783000	62207000	67791000	Q9STL5	364	15.9
AT3G48420	AT3G48420.1	AT3G48420.1 | Symbols: | Haloacid dehalogenase-like hydrolase (HAD) superfamily protein | chr3:17929743-17931551 FORWARD LENGTH=319	4	4	14.1	14.1	34.245	0	18.756	18	NA	NA	NA	NA	NA	NA	NA	NA	NA	NA	NA	NA	28092000	27705000	NA	51703000	43838000	49333000	Q94K71	319	21.9
AT3G48990	AT3G48990.1	AT3G48990.1 | Symbols: | AMP-dependent synthetase and ligase family protein | chr3:18159031-18161294 REVERSE LENGTH=514	8	8	18.9	18.9	55.544	0	36.641	50	NA	NA	NA	NA	71771000	151960000	58556000	69179000	75209000	67456000	62499000	97458000	77115000	NA	78127000	73141000	64166000	NA	Q9SMT7	514	1.2
AT3G49010	AT3G49010.4;AT3G49010.3;AT3G49010.2;AT3G49010.1;AT3G49010.5	AT3G49010.4 | Symbols: ATBBC1, BBC1, RSU2 | breast basic conserved 1 | chr3:18166971-18168047 REVERSE LENGTH=204;AT3G49010.3 | Symbols: ATBBC1, BBC1, RSU2 | breast basic conserved 1 | chr3:18166971-18168047 REVERSE LENGTH=206;AT3G49010.2 | Symbols: ATBBC1,	5	5	31.4	31.4	23.539	0	191.96	93	NA	NA	NA	216450000	99109000	NA	139660000	122550000	92080000	138770000	123370000	348570000	173560000	133110000	177730000	108400000	103960000	138120000	P41127	206	67.5
AT3G49470	AT3G49470.1	AT3G49470.1 | Symbols: NACA2 | nascent polypeptide-associated complex subunit alpha-like protein 2 | chr3:18341072-18342273 FORWARD LENGTH=217	6	6	38.7	38.7	23.712	0	323.31	196	NA	NA	NA	308980000	292040000	265230000	358030000	400860000	427090000	417380000	353060000	558600000	427280000	444150000	494130000	208300000	321120000	347860000	Q94JX9	217	100
AT3G49910	AT3G49910.1	AT3G49910.1 | Symbols: | Translation protein SH3-like family protein | chr3:18504311-18504751 FORWARD LENGTH=146	3	3	19.9	19.9	16.944	0	5.157	6	NA	NA	NA	NA	NA	NA	NA	NA	NA	NA	NA	NA	63118000	NA	18180000	NA	NA	NA	P51414	146	66.4
AT3G50360	AT3G50360.1	AT3G50360.1 | Symbols: ATCEN2, CEN1, CEN2 | centrin2 | chr3:18674421-18675502 FORWARD LENGTH=169	2	2	15.4	15.4	19.409	0	31.486	25	NA	NA	NA	NA	NA	NA	35148000	34621000	39027000	NA	24142000	37156000	NA	28942000	NA	NA	24708000	NA	O82659	169	76.9
AT3G50820	AT3G50820.1	AT3G50820.1 | Symbols: PSBO2, PSBO-2, OEC33 | photosystem II subunit O-2 | chr3:18891008-18892311 REVERSE LENGTH=331	21	8	57.7	34.4	35.019	0	226.31	199	NA	NA	NA	NA	NA	NA	38355000	57902000	36742000	433230000	388960000	378090000	926210000	735870000	687240000	1349200000	1317900000	1377300000	Q9S841	331	21.1
AT3G50980	AT3G50980.1	AT3G50980.1 | Symbols: XERO1 | dehydrin xero 1 | chr3:18942034-18942721 FORWARD LENGTH=128	2	2	25.8	25.8	13.435	0	26.908	66	1393100000	880210000	1123200000	532950000	452520000	524830000	248100000	261070000	289310000	148630000	133620000	79021000	NA	NA	NA	NA	NA	NA	P25863	128	100
AT3G51550	AT3G51550.1	AT3G51550.1 | Symbols: FER | Malectin/receptor-like protein kinase family protein | chr3:19117877-19120564 REVERSE LENGTH=895	4	4	6.7	6.7	98.149	0	72.466	26	NA	NA	NA	71537000	91043000	73043000	47623000	36789000	70535000	NA	34767000	36730000	NA	NA	NA	NA	NA	NA	Q9SCZ4	895	20.4
AT3G51730	AT3G51730.1	AT3G51730.1 | Symbols: | saposin B domain-containing protein | chr3:19186970-19188436 FORWARD LENGTH=213	4	4	24.4	24.4	24.098	0	14.839	104	NA	NA	NA	58740000	57041000	60076000	78948000	135830000	115940000	129070000	93571000	122110000	104550000	99343000	80657000	118540000	109370000	87273000	NA	NA	NA
AT3G51780	AT3G51780.1	AT3G51780.1 | Symbols: ATBAG4, BAG4 | BCL-2-associated athanogene 4 | chr3:19207029-19208178 REVERSE LENGTH=269	5	5	20.8	20.8	29.21	0	15.535	55	NA	NA	NA	68827000	56259000	83559000	52521000	54149000	61889000	63755000	47235000	64154000	49466000	51826000	44912000	52191000	62758000	57779000	Q8RX71	269	46.8
AT3G51800	AT3G51800.3;AT3G51800.1;AT3G51800.2	AT3G51800.3 | Symbols: ATG2 | metallopeptidase M24 family protein | chr3:19211261-19213568 REVERSE LENGTH=385;AT3G51800.1 | Symbols: ATG2, EBP1, ATEBP1 | metallopeptidase M24 family protein | chr3:19211261-19213568 REVERSE LENGTH=392;AT3G51800.2 | Symbols:	6	6	16.9	16.9	42.295	0	8.9263	10	NA	NA	NA	29918000	NA	53564000	NA	NA	NA	NA	NA	NA	NA	NA	NA	NA	NA	NA	Q96327	392	17.9
AT3G51810	AT3G51810.1	AT3G51810.1 | Symbols: ATEM1, GEA1, AT3, EM1 | Stress induced protein | chr3:19214818-19215461 FORWARD LENGTH=152	11	11	55.9	55.9	16.612	0	323.31	238	15300000000	14200000000	15500000000	1124600000	646760000	584300000	183890000	255650000	262600000	NA	NA	81982000	NA	NA	NA	NA	NA	NA	Q07187	152	100
AT3G51880	AT3G51880.4;AT3G51880.3;AT3G51880.1;AT3G51880.2	AT3G51880.4 | Symbols: HMGB1 | high mobility group B1 | chr3:19247241-19248491 REVERSE LENGTH=161;AT3G51880.3 | Symbols: HMGB1, NFD1 | high mobility group B1 | chr3:19247241-19248491 REVERSE LENGTH=178;AT3G51880.1 | Symbols: HMGB1, NFD1 | high mobility gro	4	4	21.1	21.1	18.319	0	21.797	11	NA	34143000	45153000	NA	NA	NA	NA	NA	NA	NA	NA	NA	NA	NA	NA	NA	NA	NA	O49595	178	100
AT3G51890	AT3G51890.1	AT3G51890.1 | Symbols: | Clathrin light chain protein | chr3:19249686-19250890 REVERSE LENGTH=258	7	6	35.7	32.6	29.183	0	247.8	51	NA	NA	NA	220770000	223400000	152600000	96104000	91961000	132250000	98088000	88187000	130590000	61779000	75541000	74370000	51080000	60733000	52018000	F4J5M9	258	100
AT3G52140	AT3G52140.3;AT3G52140.1;AT3G52140.2;AT3G52140.4	AT3G52140.3 | Symbols: | tetratricopeptide repeat (TPR)-containing protein | chr3:19333232-19341295 FORWARD LENGTH=1396;AT3G52140.1 | Symbols: | tetratricopeptide repeat (TPR)-containing protein | chr3:19333232-19341295 FORWARD LENGTH=1403;AT3G52140.2 |	2	2	2.3	2.3	152.52	0	8.085	12	NA	NA	NA	NA	NA	NA	NA	NA	NA	NA	20600000	35574000	NA	NA	NA	NA	NA	NA	NA	NA	NA
AT3G52150	AT3G52150.2;AT3G52150.1	AT3G52150.2 | Symbols: | RNA-binding (RRM/RBD/RNP motifs) family protein | chr3:19342074-19343090 FORWARD LENGTH=253;AT3G52150.1 | Symbols: | RNA-binding (RRM/RBD/RNP motifs) family protein | chr3:19342074-19343090 FORWARD LENGTH=253	9	9	37.5	37.5	27.748	0	97.643	312	NA	NA	57213000	721880000	481760000	441390000	783290000	1057200000	794950000	1757800000	1919600000	1949900000	2359700000	2140000000	2227700000	3260000000	2574600000	2956500000	Q8VYM4	253	27.7
AT3G52200	AT3G52200.1;AT3G52200.2	AT3G52200.1 | Symbols: LTA3 | Dihydrolipoamide acetyltransferase, long form protein | chr3:19360317-19366091 FORWARD LENGTH=637;AT3G52200.2 | Symbols: LTA3 | Dihydrolipoamide acetyltransferase, long form protein | chr3:19360317-19366091 FORWARD LENGTH=713	5	5	9.6	9.6	68.862	0	14.967	26	NA	NA	NA	NA	NA	NA	41019000	46551000	37585000	53203000	52709000	28999000	32746000	NA	NA	44303000	42554000	33631000	Q0WQF7	637	29.5
AT3G52300	AT3G52300.1;AT3G52300.2	AT3G52300.1 | Symbols: ATPQ | ATP synthase D chain, mitochondrial | chr3:19396689-19398119 FORWARD LENGTH=168;AT3G52300.2 | Symbols: ATPQ | ATP synthase D chain, mitochondrial | chr3:19396689-19397866 FORWARD LENGTH=122	11	11	50	50	19.586	0	30.584	79	NA	NA	NA	174920000	148910000	104460000	151720000	160490000	148350000	148220000	196690000	246510000	77805000	147300000	137440000	100450000	141250000	103220000	Q9FT52	168	14.9
AT3G52380	AT3G52380.1	AT3G52380.1 | Symbols: CP33, PDE322 | chloroplast RNA-binding protein 33 | chr3:19421619-19422855 FORWARD LENGTH=329	7	7	23.4	23.4	35.744	0	34.787	263	NA	NA	NA	618480000	537180000	475990000	784110000	664300000	723790000	1145300000	1285600000	1146800000	2076900000	2076900000	2250000000	2802500000	2631600000	2598300000	Q39061	329	33.7
AT3G52560	AT3G52560.1;AT3G52560.2;AT3G52560.4;AT3G52560.3	AT3G52560.1 | Symbols: UEV1D-4, MMZ4, UEV1D | ubiquitin E2 variant 1D-4 | chr3:19494678-19495954 REVERSE LENGTH=146;AT3G52560.2 | Symbols: UEV1D-4 | ubiquitin E2 variant 1D-4 | chr3:19494678-19495954 REVERSE LENGTH=147;AT3G52560.4 | Symbols: UEV1D-4 | ubiq	4	2	26.7	15.1	16.533	0	11.137	21	NA	NA	NA	NA	NA	NA	46054000	49509000	38837000	47772000	62620000	NA	NA	45477000	NA	NA	NA	NA	Q9SVD7	146	21.9
AT3G52930	AT3G52930.1	AT3G52930.1 | Symbols: | Aldolase superfamily protein | chr3:19627383-19628874 REVERSE LENGTH=358	18	12	67.6	39.4	38.539	0	323.31	482	482870000	409880000	775890000	1056200000	1371200000	812740000	1433300000	1414200000	1342100000	1529500000	1504600000	709310000	1226300000	1209600000	1349100000	949370000	1036300000	1012200000	Q9LF98	358	6.4
AT3G52960	AT3G52960.1	AT3G52960.1 | Symbols: | Thioredoxin superfamily protein | chr3:19639699-19640403 FORWARD LENGTH=234	10	10	35.5	35.5	24.684	0	53.136	501	1240000000	1160400000	1341500000	1682100000	2212300000	1811100000	1439300000	1367200000	1429500000	2555300000	2430000000	1208700000	2105400000	2313900000	2449700000	2730300000	2861900000	2671300000	Q949U7	234	2.6
AT3G53040	AT3G53040.1	AT3G53040.1 | Symbols: | late embryogenesis abundant protein, putative / LEA protein, putative | chr3:19664797-19666405 REVERSE LENGTH=479	35	34	51.6	49.9	52.084	0	323.31	1187	16600000000	14300000000	14200000000	15800000000	13000000000	17300000000	7030000000	8367800000	9060000000	4625700000	4747400000	6670400000	2521400000	2678900000	3042100000	2130500000	2031300000	2019200000	Q9LF88	479	100
AT3G53430	AT3G53430.1;AT2G37190.1;AT5G60670.1	AT3G53430.1 | Symbols: | Ribosomal protein L11 family protein | chr3:19809895-19810395 REVERSE LENGTH=166;AT2G37190.1 | Symbols: | Ribosomal protein L11 family protein | chr2:15619559-15620059 REVERSE LENGTH=166;AT5G60670.1 | Symbols: | Ribosomal protei	5	5	41	41	17.97	0	11.774	81	NA	NA	NA	126570000	84181000	84077000	150930000	172700000	125720000	95906000	103250000	266140000	239100000	93827000	126470000	148960000	115720000	159340000	Q9LFH5	166	40.4
AT3G53460	AT3G53460.3;AT3G53460.2;AT3G53460.1;AT3G53460.4	AT3G53460.3 | Symbols: CP29 | chloroplast RNA-binding protein 29 | chr3:19819738-19821423 REVERSE LENGTH=342;AT3G53460.2 | Symbols: CP29 | chloroplast RNA-binding protein 29 | chr3:19819738-19821423 REVERSE LENGTH=342;AT3G53460.1 | Symbols: CP29 | chloropl	13	9	38	32.7	36.007	0	104.71	209	NA	NA	NA	266600000	287700000	108200000	725070000	744790000	558010000	1707700000	1420000000	657450000	1826400000	2319900000	2595200000	1998200000	2130000000	2120300000	Q43349	342	36.5
AT3G53560	AT3G53560.1	AT3G53560.1 | Symbols: | Tetratricopeptide repeat (TPR)-like superfamily protein | chr3:19859954-19860976 REVERSE LENGTH=340	4	4	12.1	12.1	38.664	0	13.407	26	NA	NA	NA	37160000	31200000	58448000	NA	NA	NA	NA	NA	NA	NA	NA	74295000	36220000	61306000	43875000	NA	NA	NA
AT3G53580	AT3G53580.1	AT3G53580.1 | Symbols: | diaminopimelate epimerase family protein | chr3:19864784-19866907 FORWARD LENGTH=362	6	6	20.7	20.7	38.984	0	28.466	26	NA	NA	NA	NA	NA	NA	NA	NA	NA	39657000	36815000	NA	44482000	39958000	NA	40220000	40192000	43702000	Q9LFG2	362	2.8
AT3G53710	AT3G53710.2;AT3G53710.1	AT3G53710.2 | Symbols: AGD6 | ARF-GAP domain 6 | chr3:19903730-19905419 REVERSE LENGTH=459;AT3G53710.1 | Symbols: AGD6 | ARF-GAP domain 6 | chr3:19903730-19905419 REVERSE LENGTH=459	3	3	8.9	8.9	49.723	0	80.802	3	NA	NA	NA	NA	NA	NA	NA	NA	NA	NA	11364000	56227000	NA	NA	NA	NA	NA	NA	Q9M354	459	60.1
AT3G53890	AT3G53890.2;AT3G53890.1	AT3G53890.2 | Symbols: | Ribosomal protein S21e | chr3:19955582-19956049 REVERSE LENGTH=82;AT3G53890.1 | Symbols: | Ribosomal protein S21e | chr3:19955582-19956049 REVERSE LENGTH=82	5	5	37.8	37.8	9.0741	0	94.669	41	NA	NA	NA	NA	NA	NA	NA	240680000	265860000	224500000	337610000	303160000	NA	NA	NA	NA	NA	NA	Q9M337	82	13.4
AT3G53970	AT3G53970.1;AT3G53970.2	AT3G53970.1 | Symbols: | proteasome inhibitor-related | chr3:19985208-19987132 FORWARD LENGTH=302;AT3G53970.2 | Symbols: | proteasome inhibitor-related | chr3:19985208-19986762 FORWARD LENGTH=252	4	4	19.5	19.5	32.116	0	11.66	33	NA	40750000	67020000	70703000	89967000	NA	NA	65742000	73195000	NA	43803000	NA	56932000	77304000	NA	NA	NA	NA	Q9M330	302	52
AT3G54170	AT3G54170.1	AT3G54170.1 | Symbols: ATFIP37, FIP37 | FKBP12 interacting protein 37 | chr3:20056848-20059396 FORWARD LENGTH=330	3	3	10	10	37.214	0	6.9866	9	NA	NA	NA	NA	NA	NA	NA	NA	NA	NA	NA	NA	NA	NA	NA	18017000	NA	16560000	Q9ZSZ8	330	36.7
AT3G54760	AT3G54760.2;AT3G54760.1	AT3G54760.2 | Symbols: | dentin sialophosphoprotein-related | chr3:20269659-20272037 REVERSE LENGTH=761;AT3G54760.1 | Symbols: | dentin sialophosphoprotein-related | chr3:20269659-20272037 REVERSE LENGTH=792	12	12	21.8	21.8	82.754	0	62.289	54	NA	NA	NA	81072000	124300000	143800000	81978000	121530000	103040000	77899000	77205000	98985000	78710000	59677000	82257000	59975000	78174000	62255000	NA	NA	NA
AT3G54960	AT3G54960.1;AT3G54960.2	AT3G54960.1 | Symbols: ATPDIL1-3, PDI1, ATPDI1, PDIL1-3 | PDI-like 1-3 | chr3:20363514-20366822 REVERSE LENGTH=579;AT3G54960.2 | Symbols: ATPDIL1-3, PDIL1-3 | PDI-like 1-3 | chr3:20363895-20366822 REVERSE LENGTH=518	16	16	33.5	33.5	64.211	0	170.46	228	NA	NA	NA	NA	191720000	229630000	327260000	303720000	287510000	464070000	469550000	253330000	236740000	309150000	338490000	176390000	264890000	201770000	Q8VX13	579	23.3
AT3G55280	AT3G55280.3;AT3G55280.2;AT3G55280.1;AT2G39460.2;AT2G39460.1	AT3G55280.3 | Symbols: RPL23AB | ribosomal protein L23AB | chr3:20500667-20501519 FORWARD LENGTH=148;AT3G55280.2 | Symbols: RPL23AB | ribosomal protein L23AB | chr3:20500667-20501519 FORWARD LENGTH=154;AT3G55280.1 | Symbols: RPL23AB | ribosomal protein L23	6	6	37.8	37.8	16.744	0	40.996	143	NA	NA	NA	741710000	399170000	96340000	494760000	583970000	516020000	429420000	316700000	560230000	184230000	182970000	236700000	267130000	178270000	314250000	Q9M3C3	154	48.1
AT3G55440	AT3G55440.1	AT3G55440.1 | Symbols: ATCTIMC, TPI, CYTOTPI | triosephosphate isomerase | chr3:20553794-20556078 FORWARD LENGTH=254	12	11	57.1	53.9	27.169	0	138.25	330	221040000	211930000	440790000	412560000	790870000	283820000	819610000	746710000	664520000	998070000	1250600000	346150000	978320000	992350000	1005300000	815410000	1052300000	774370000	P48491	254	0
AT3G55800	AT3G55800.1	AT3G55800.1 | Symbols: SBPASE | sedoheptulose-bisphosphatase | chr3:20709640-20711421 FORWARD LENGTH=393	6	6	20.1	20.1	42.414	0	11.691	18	NA	NA	NA	NA	NA	NA	NA	NA	NA	NA	NA	NA	75804000	NA	NA	71213000	44145000	87913000	P46283	393	19.3
AT3G56090	AT3G56090.1	AT3G56090.1 | Symbols: ATFER3, FER3 | ferritin 3 | chr3:20814350-20815984 REVERSE LENGTH=259	6	4	30.5	20.8	28.836	0	7.242	17	NA	NA	NA	NA	NA	NA	NA	NA	NA	NA	NA	NA	85784000	NA	NA	101100000	69304000	94124000	Q9LYN2	259	23.2
AT3G56240	AT3G56240.1	AT3G56240.1 | Symbols: CCH | copper chaperone | chr3:20863460-20864402 REVERSE LENGTH=121	7	6	47.9	44.6	12.971	0	9.1723	83	NA	NA	NA	NA	NA	NA	254680000	389430000	240540000	455670000	542760000	503750000	516580000	561750000	546760000	821290000	710210000	698180000	O82089	121	100
AT3G56310	AT3G56310.1;AT3G56310.2	AT3G56310.1 | Symbols: | Melibiase family protein | chr3:20882886-20885745 FORWARD LENGTH=437;AT3G56310.2 | Symbols: | Melibiase family protein | chr3:20882886-20885745 FORWARD LENGTH=413	5	5	15.1	15.1	48.362	0	76.351	51	NA	NA	NA	41607000	82737000	52192000	66462000	56563000	50710000	100780000	93507000	NA	65042000	73291000	101320000	57957000	86977000	53066000	Q8VXZ7	437	1.1
AT3G56350	AT3G56350.1	AT3G56350.1 | Symbols: | Iron/manganese superoxide dismutase family protein | chr3:20894155-20895625 REVERSE LENGTH=241	10	10	62.7	62.7	26.891	0	286.16	601	9982800000	11600000000	8600600000	11700000000	10400000000	7548400000	5542700000	5303600000	7732800000	2566500000	2642200000	3924100000	1537300000	1712100000	1570100000	1799600000	1773400000	1866800000	Q9LYK8	241	1.7
AT3G56490	AT3G56490.1	AT3G56490.1 | Symbols: HIT3, HINT1 | HIS triad family protein 3 | chr3:20941532-20943129 FORWARD LENGTH=147	4	4	34.7	34.7	16	0	10.599	42	NA	NA	NA	36060000	87029000	34160000	72202000	55994000	51769000	60887000	69745000	35776000	53267000	65544000	NA	42374000	48772000	48057000	Q8GUN2	147	0
AT3G56910	AT3G56910.1	AT3G56910.1 | Symbols: PSRP5 | plastid-specific 50S ribosomal protein 5 | chr3:21069558-21070257 REVERSE LENGTH=148	3	3	20.3	20.3	16.361	0	5.7703	22	NA	NA	NA	NA	NA	NA	NA	NA	NA	NA	41638000	91111000	77531000	66917000	NA	129190000	84232000	123830000	Q9LER7	148	100
AT3G57410	AT3G57410.1	AT3G57410.1 | Symbols: VLN3, ATVLN3 | villin 3 | chr3:21243615-21249809 REVERSE LENGTH=965	7	7	10.1	10.1	106.35	0	85.645	86	NA	NA	NA	NA	NA	NA	95539000	127300000	128090000	109240000	111920000	150940000	89490000	139700000	146420000	161520000	155490000	151030000	O81645	965	26
AT3G57560	AT3G57560.1	AT3G57560.1 | Symbols: NAGK | N-acetyl-l-glutamate kinase | chr3:21311164-21312207 REVERSE LENGTH=347	3	3	14.1	14.1	36.595	0	18.607	9	38178000	NA	44419000	NA	NA	NA	NA	NA	NA	NA	NA	NA	NA	NA	NA	NA	NA	NA	Q9SCL7	347	18.2
AT3G58450	AT3G58450.2;AT3G58450.1	AT3G58450.2 | Symbols: | Adenine nucleotide alpha hydrolases-like superfamily protein | chr3:21622032-21623057 FORWARD LENGTH=197;AT3G58450.1 | Symbols: | Adenine nucleotide alpha hydrolases-like superfamily protein | chr3:21622032-21623057 FORWARD LENGT	3	3	17.3	17.3	21.707	0	76.541	25	67372000	69503000	77426000	NA	64665000	NA	NA	NA	NA	NA	NA	NA	NA	NA	NA	NA	NA	NA	NA	NA	NA
AT3G58600	AT3G58600.1	AT3G58600.1 | Symbols: | Adaptin ear-binding coat-associated protein 1 NECAP-1 | chr3:21668746-21670999 REVERSE LENGTH=302	2	2	6.6	6.6	33.917	0.00077882	2.6708	9	NA	NA	NA	22807000	39948000	24466000	NA	NA	NA	NA	NA	NA	NA	NA	NA	33557000	35620000	36387000	NA	NA	NA
AT3G58610	AT3G58610.3;AT3G58610.2;AT3G58610.1	AT3G58610.3 | Symbols: | ketol-acid reductoisomerase | chr3:21671561-21674639 FORWARD LENGTH=591;AT3G58610.2 | Symbols: | ketol-acid reductoisomerase | chr3:21671561-21674639 FORWARD LENGTH=591;AT3G58610.1 | Symbols: | ketol-acid reductoisomerase | chr3	4	4	8	8	63.812	0	10.992	10	NA	NA	NA	NA	NA	NA	NA	NA	NA	NA	NA	NA	73158000	NA	NA	45197000	32456000	44848000	Q05758	591	6.8
AT3G59540	AT3G59540.1;AT2G43460.1	AT3G59540.1 | Symbols: | Ribosomal L38e protein family | chr3:21995897-21996742 REVERSE LENGTH=69;AT2G43460.1 | Symbols: | Ribosomal L38e protein family | chr2:18046285-18047292 REVERSE LENGTH=69	2	2	27.5	27.5	8.1216	0	6.3574	12	NA	NA	NA	NA	NA	NA	27196000	NA	NA	NA	28109000	26707000	NA	NA	NA	30295000	29290000	39203000	O22860	69	24.6
AT3G59840	AT3G59840.1	AT3G59840.1 | Symbols: | unknown protein; FUNCTIONS IN: molecular_function unknown; INVOLVED IN: biological_process unknown; LOCATED IN: chloroplast, chloroplast envelope; EXPRESSED IN: 23 plant structures; EXPRESSED DURING: 13 growth stages; Has 72 Blast	2	2	33	33	10.5	0	39.977	26	NA	NA	NA	39356000	NA	NA	35588000	NA	49277000	NA	NA	NA	NA	44175000	NA	NA	54970000	NA	NA	NA	NA
AT3G59980	AT3G59980.1	AT3G59980.1 | Symbols: | Nucleic acid-binding, OB-fold-like protein | chr3:22154528-22155570 REVERSE LENGTH=273	5	5	24.5	24.5	29.745	0	23.13	33	NA	NA	NA	NA	NA	NA	NA	131590000	56298000	177880000	143340000	101210000	146650000	149360000	162200000	177140000	190990000	161850000	NA	NA	NA
AT3G60210	AT3G60210.1	AT3G60210.1 | Symbols: | GroES-like family protein | chr3:22251443-22252709 REVERSE LENGTH=138	4	2	26.8	15.2	15.14	0	83.417	46	NA	NA	NA	NA	NA	NA	NA	NA	NA	NA	84315000	116950000	125650000	NA	98956000	126190000	133620000	105650000	Q9M1C2	138	6.5
AT3G60240	AT3G60240.2;AT3G60240.3;AT3G60240.4	AT3G60240.2 | Symbols: EIF4G, CUM2 | eukaryotic translation initiation factor 4G | chr3:22261842-22268295 FORWARD LENGTH=1723;AT3G60240.3 | Symbols: EIF4G, CUM2 | eukaryotic translation initiation factor 4G | chr3:22261842-22268295 FORWARD LENGTH=1725;AT3G	7	7	4.1	4.1	187.55	0	9.5168	30	NA	NA	NA	NA	NA	NA	51140000	68652000	50617000	76950000	63674000	82494000	34344000	70913000	58384000	125310000	67733000	116730000	NA	NA	NA
AT3G60750	AT3G60750.2;AT3G60750.1	AT3G60750.2 | Symbols: | Transketolase | chr3:22454004-22456824 FORWARD LENGTH=740;AT3G60750.1 | Symbols: | Transketolase | chr3:22454004-22456824 FORWARD LENGTH=741	10	10	17	17	79.838	0	37.981	72	NA	NA	NA	NA	NA	NA	64031000	53332000	NA	64279000	84446000	65647000	391000000	128440000	119570000	192910000	166980000	224400000	Q8RWV0	741	9.4
AT3G60900	AT3G60900.1	AT3G60900.1 | Symbols: FLA10 | FASCICLIN-like arabinogalactan-protein 10 | chr3:22499573-22500841 REVERSE LENGTH=422	6	3	21.1	14.5	43.607	0	22.687	46	NA	131760000	92650000	81674000	63084000	60927000	40423000	22899000	59587000	33849000	23753000	40787000	NA	NA	NA	NA	NA	26915000	Q9LZX4	422	22
AT3G62030	AT3G62030.3;AT3G62030.1;AT3G62030.2	AT3G62030.3 | Symbols: ROC4 | rotamase CYP 4 | chr3:22973708-22975139 FORWARD LENGTH=259;AT3G62030.1 | Symbols: ROC4 | rotamase CYP 4 | chr3:22973708-22975139 FORWARD LENGTH=260;AT3G62030.2 | Symbols: ROC4 | rotamase CYP 4 | chr3:22973004-22975139 FORWARD	3	3	10.8	10.8	28.079	0	4.1666	48	NA	NA	NA	NA	30787000	NA	44187000	31614000	NA	65011000	50787000	34706000	179460000	110940000	148870000	85731000	101250000	90305000	P34791	260	7.3
AT3G62410	AT3G62410.1	AT3G62410.1 | Symbols: CP12-2, CP12 | CP12 domain-containing protein 2 | chr3:23091006-23091401 FORWARD LENGTH=131	4	4	51.1	51.1	14.167	0	78.137	61	NA	NA	NA	NA	NA	NA	NA	NA	NA	NA	NA	52699000	199920000	164960000	115810000	285020000	131310000	257560000	Q9LZP9	131	91.6
AT3G62530	AT3G62530.1	AT3G62530.1 | Symbols: | ARM repeat superfamily protein | chr3:23132219-23133121 FORWARD LENGTH=221	5	5	21.3	21.3	24.503	0	15.042	41	NA	NA	NA	56531000	54413000	89185000	71418000	93426000	76912000	56855000	57683000	86135000	47982000	42326000	43455000	NA	NA	NA	NA	NA	NA
AT3G62940	AT3G62940.1;AT3G62940.3;AT3G62940.2	AT3G62940.1 | Symbols: | Cysteine proteinases superfamily protein | chr3:23263106-23264197 REVERSE LENGTH=316;AT3G62940.3 | Symbols: | Cysteine proteinases superfamily protein | chr3:23263106-23264245 REVERSE LENGTH=332;AT3G62940.2 | Symbols: | Cysteine	2	2	8.2	8.2	35.672	0	15.349	15	NA	NA	NA	NA	NA	NA	NA	53926000	48109000	NA	NA	NA	NA	NA	NA	NA	NA	NA	Q9LYC7	332	52.4
AT3G63190	AT3G63190.1	AT3G63190.1 | Symbols: RRF, HFP108, cpRRF, AtcpRRF | ribosome recycling factor, chloroplast precursor | chr3:23342861-23344640 REVERSE LENGTH=275	9	9	33.8	33.8	30.422	0	149.08	398	234480000	275040000	312220000	785110000	678710000	965770000	948400000	1001200000	856600000	1890200000	1492300000	2290000000	2207200000	2180000000	2404200000	3194500000	2939500000	2765800000	Q9M1X0	275	8.4
AT3G63460	AT3G63460.3;AT3G63460.2;AT3G63460.1	AT3G63460.3 | Symbols: | transducin family protein / WD-40 repeat family protein | chr3:23431009-23437241 REVERSE LENGTH=1094;AT3G63460.2 | Symbols: | transducin family protein / WD-40 repeat family protein | chr3:23431009-23437241 REVERSE LENGTH=1102;AT	3	3	3.7	3.7	118.72	0	40.812	36	NA	NA	NA	114220000	NA	387700000	75710000	NA	33867000	20461000	NA	294550000	45078000	NA	NA	NA	NA	NA	NA	NA	NA
AT3G63540	AT3G63540.1	AT3G63540.1 | Symbols: | Mog1/PsbP/DUF1795-like photosystem II reaction center PsbP family protein | chr3:23459372-23459803 REVERSE LENGTH=143	4	4	42	42	16.279	0	20.062	47	NA	NA	NA	NA	NA	NA	NA	NA	NA	44217000	60577000	18641000	44955000	77502000	74082000	71881000	94640000	81436000	P82658	229	7
AT4G01290	AT4G01290.2;AT4G01290.1	AT4G01290.2 | Symbols: | unknown protein; FUNCTIONS IN: molecular_function unknown; INVOLVED IN: biological_process unknown; LOCATED IN: cellular_component unknown; EXPRESSED IN: 24 plant structures; EXPRESSED DURING: 15 growth stages; Has 1797 Blast hits	5	5	5.8	5.8	108.49	0	14.002	16	NA	NA	NA	NA	NA	NA	NA	NA	NA	27403000	19937000	31524000	NA	NA	NA	25977000	31730000	31173000	NA	NA	NA
AT4G01610	AT4G01610.2;AT4G01610.1	AT4G01610.2 | Symbols: | Cysteine proteinases superfamily protein | chr4:694857-696937 FORWARD LENGTH=359;AT4G01610.1 | Symbols: | Cysteine proteinases superfamily protein | chr4:694857-696937 FORWARD LENGTH=359	3	3	8.1	8.1	39.344	0	5.9765	12	NA	NA	NA	104780000	82563000	89151000	NA	NA	NA	NA	NA	NA	NA	NA	NA	NA	NA	NA	Q94K85	359	2.8
AT4G01850	AT4G01850.2;AT4G01850.1	AT4G01850.2 | Symbols: SAM-2, MAT2, SAM2, AtSAM2 | S-adenosylmethionine synthetase 2 | chr4:796298-797479 REVERSE LENGTH=393;AT4G01850.1 | Symbols: SAM-2, MAT2, SAM2, AtSAM2 | S-adenosylmethionine synthetase 2 | chr4:796298-797479 REVERSE LENGTH=393	7	2	19.6	5.6	43.255	0	14.844	10	NA	NA	NA	NA	NA	NA	NA	NA	NA	NA	28790000	29272000	NA	NA	NA	NA	NA	NA	P17562	393	0
AT4G01900	AT4G01900.1	AT4G01900.1 | Symbols: PII, GLB1 | GLNB1 homolog | chr4:821736-823294 FORWARD LENGTH=196	11	11	46.4	46.4	21.275	0	323.31	737	7751400000	9315600000	7107600000	6050000000	4678600000	7034500000	3747900000	3340000000	3430600000	2398200000	2352600000	4182300000	1952500000	2128800000	2036400000	2506200000	2294900000	2196800000	Q9ZST4	196	6.6
AT4G01940	AT4G01940.1	AT4G01940.1 | Symbols: NFU1, AtCNFU1 | NFU domain protein 1 | chr4:842265-843388 REVERSE LENGTH=231	3	3	19.9	19.9	24.768	0	8.7042	9	NA	NA	NA	NA	NA	NA	NA	NA	NA	NA	NA	NA	NA	84333000	72261000	NA	NA	NA	Q93W77	231	11.7
AT4G02450	AT4G02450.2;AT4G02450.1	AT4G02450.2 | Symbols: | HSP20-like chaperones superfamily protein | chr4:1073987-1075765 REVERSE LENGTH=240;AT4G02450.1 | Symbols: | HSP20-like chaperones superfamily protein | chr4:1073987-1075765 REVERSE LENGTH=241	12	12	37.5	37.5	25.341	0	223.93	462	320180000	387730000	492510000	1973100000	3751400000	1480000000	2960000000	2917100000	3481400000	3059200000	2870000000	930210000	2424900000	2479200000	2809500000	1625400000	2291200000	1904800000	Q8L7U4	241	61
AT4G02510	AT4G02510.1	AT4G02510.1 | Symbols: TOC159, TOC86, PPI2, TOC160, ATTOC159 | translocon at the outer envelope membrane of chloroplasts 159 | chr4:1104766-1109360 FORWARD LENGTH=1503	25	25	22.7	22.7	160.82	0	323.31	343	NA	NA	NA	449220000	449410000	700170000	512460000	560260000	588250000	562990000	454010000	885480000	590050000	580530000	744420000	522670000	606430000	535970000	NA	NA	NA
AT4G02520	AT4G02520.1;AT2G02930.1	AT4G02520.1 | Symbols: ATGSTF2, ATPM24.1, ATPM24, GST2, GSTF2 | glutathione S-transferase PHI 2 | chr4:1110673-1111531 REVERSE LENGTH=212;AT2G02930.1 | Symbols: ATGSTF3, GST16, GSTF3 | glutathione S-transferase F3 | chr2:851348-852106 REVERSE LENGTH=212	9	7	51.4	43.9	24.128	0	57.043	92	36748000	109930000	390890000	96144000	147250000	150630000	84867000	87000000	61331000	83308000	85487000	49803000	87387000	77308000	69637000	91788000	68713000	74153000	P46422	212	0
AT4G02530	AT4G02530.1	AT4G02530.1 | Symbols: | chloroplast thylakoid lumen protein | chr4:1112335-1114005 REVERSE LENGTH=216	6	6	31.9	31.9	23.663	0	14.069	55	NA	NA	NA	NA	NA	NA	61042000	75636000	56337000	134760000	117730000	48279000	141230000	132760000	145890000	132270000	126790000	139890000	O22773	216	20.8
AT4G03520	AT4G03520.1;AT4G03520.2	AT4G03520.1 | Symbols: ATHM2 | Thioredoxin superfamily protein | chr4:1562585-1564055 REVERSE LENGTH=186;AT4G03520.2 | Symbols: ATHM2 | Thioredoxin superfamily protein | chr4:1562585-1562803 REVERSE LENGTH=72	6	6	30.1	30.1	20.312	0	104.6	260	158150000	153000000	158780000	357990000	303680000	592740000	433000000	514840000	401490000	677210000	668230000	844920000	771040000	824650000	672010000	1032400000	919410000	946540000	Q9SEU8	186	18.8
AT4G04210	AT4G04210.1	AT4G04210.1 | Symbols: PUX4 | plant UBX domain containing protein 4 | chr4:2030391-2031670 FORWARD LENGTH=303	7	7	20.1	20.1	32.896	0	95.681	89	NA	NA	NA	141790000	148500000	180430000	158690000	159160000	152130000	147330000	151720000	202340000	123590000	148010000	167730000	105590000	105550000	168270000	Q8RWU7	303	96
AT4G04800	AT4G04800.1	AT4G04800.1 | Symbols: ATMSRB3, MSRB3 | methionine sulfoxide reductase B3 | chr4:2439574-2440937 FORWARD LENGTH=176	6	4	44.9	34.7	18.847	0	10.152	16	NA	NA	NA	NA	NA	NA	NA	NA	NA	41987000	46145000	31384000	NA	NA	NA	NA	NA	NA	Q9M0Z6	176	8
AT4G04840	AT4G04840.1	AT4G04840.1 | Symbols: ATMSRB6, MSRB6 | methionine sulfoxide reductase B6 | chr4:2449659-2451302 FORWARD LENGTH=153	2	2	13.1	13.1	17.097	0	3.3578	16	NA	NA	NA	NA	NA	NA	NA	NA	NA	NA	NA	NA	NA	NA	NA	94139000	77885000	NA	Q8GWF4	153	32.7
AT4G04950	AT4G04950.1	AT4G04950.1 | Symbols: | thioredoxin family protein | chr4:2517882-2519924 REVERSE LENGTH=488	8	8	24	24	53.115	0	46.458	40	NA	NA	NA	103760000	85804000	171740000	68007000	71998000	50737000	70058000	85859000	72826000	48589000	49284000	96647000	NA	NA	NA	Q9ZPH2	488	15.4
AT4G05180	AT4G05180.1	AT4G05180.1 | Symbols: PSBQ, PSBQ-2, PSII-Q | photosystem II subunit Q-2 | chr4:2672093-2673170 REVERSE LENGTH=230	10	9	42.2	37.8	24.643	0	216.14	261	NA	NA	NA	NA	NA	37716000	55600000	115360000	55059000	574900000	549930000	564640000	1349300000	1393200000	1444400000	3949200000	2972500000	2951700000	Q41932	230	9.6
AT4G05400	AT4G05400.2;AT4G05400.1	AT4G05400.2 | Symbols: | copper ion binding | chr4:2741256-2742008 FORWARD LENGTH=250;AT4G05400.1 | Symbols: | copper ion binding | chr4:2741256-2742008 FORWARD LENGTH=250	6	6	23.2	23.2	27.627	0	50.229	35	NA	NA	NA	NA	NA	NA	81760000	79723000	84324000	68706000	73309000	100690000	NA	NA	NA	NA	NA	NA	NA	NA	NA
AT4G08280	AT4G08280.1	AT4G08280.1 | Symbols: | Thioredoxin superfamily protein | chr4:5230345-5231196 FORWARD LENGTH=126	3	3	23	23	13.843	0	5.009	23	NA	NA	NA	NA	NA	NA	30427000	NA	NA	34231000	33786000	37383000	34359000	32623000	38667000	45843000	33830000	40456000	NA	NA	NA
AT4G08390	AT4G08390.3;AT4G08390.2;AT4G08390.1;AT4G08390.4	AT4G08390.3 | Symbols: SAPX | stromal ascorbate peroxidase | chr4:5314999-5317071 FORWARD LENGTH=371;AT4G08390.2 | Symbols: SAPX | stromal ascorbate peroxidase | chr4:5314999-5317071 FORWARD LENGTH=372;AT4G08390.1 | Symbols: SAPX | stromal ascorbate peroxi	12	11	42.3	38.8	40.279	0	202.91	224	NA	NA	58689000	165160000	301780000	172730000	327470000	315780000	318590000	365330000	506550000	247360000	437980000	445800000	499000000	416530000	485160000	440540000	Q42592	372	13.4
AT4G09000	AT4G09000.1;AT4G09000.2	AT4G09000.1 | Symbols: GRF1, GF14 CHI | general regulatory factor 1 | chr4:5775387-5777157 FORWARD LENGTH=267;AT4G09000.2 | Symbols: GRF1, GF14 CHI | general regulatory factor 1 | chr4:5775387-5777157 FORWARD LENGTH=318	12	6	53.9	30.3	29.931	0	21.372	73	NA	NA	NA	NA	128410000	NA	105020000	93635000	70815000	309550000	332820000	NA	223110000	265390000	242430000	144350000	266380000	196350000	P42643	267	19.1
AT4G09040	AT4G09040.2;AT4G09040.1	AT4G09040.2 | Symbols: | RNA-binding (RRM/RBD/RNP motifs) family protein | chr4:5795075-5797193 REVERSE LENGTH=244;AT4G09040.1 | Symbols: | RNA-binding (RRM/RBD/RNP motifs) family protein | chr4:5795075-5797315 REVERSE LENGTH=304	4	4	18.9	18.9	27.703	0	9.5088	12	NA	NA	NA	24323000	NA	73543000	NA	NA	NA	NA	NA	53967000	NA	NA	NA	32644000	28354000	32687000	NA	NA	NA
AT4G09320	AT4G09320.1	AT4G09320.1 | Symbols: NDPK1 | Nucleoside diphosphate kinase family protein | chr4:5923424-5924366 FORWARD LENGTH=169	4	4	27.8	27.8	18.814	0	69.769	52	NA	NA	97017000	NA	64938000	98571000	67130000	72607000	NA	46168000	NA	65424000	192010000	63223000	63929000	77569000	65881000	102360000	P39207	149	0
AT4G09650	AT4G09650.1	AT4G09650.1 | Symbols: ATPD | ATP synthase delta-subunit gene | chr4:6100799-6101503 FORWARD LENGTH=234	2	2	14.5	14.5	25.668	0	6.1581	5	NA	NA	NA	NA	NA	NA	NA	NA	NA	NA	NA	NA	NA	NA	NA	21787000	NA	16479000	Q9SSS9	234	20.9
AT4G09800	AT4G09800.1;AT1G34030.1;AT1G22780.1	AT4G09800.1 | Symbols: RPS18C | S18 ribosomal protein | chr4:6173818-6174963 FORWARD LENGTH=152;AT1G34030.1 | Symbols: | Ribosomal protein S13/S18 family | chr1:12370285-12371465 REVERSE LENGTH=152;AT1G22780.1 | Symbols: PFL, RPS18A, PFL1 | Ribosomal prot	2	2	13.8	13.8	17.545	0	96.968	38	NA	NA	37107000	24286000	34316000	NA	55367000	52134000	43479000	29557000	35412000	50748000	160280000	41576000	NA	40920000	34368000	51892000	P34788	152	17.8
AT4G10300	AT4G10300.1	AT4G10300.1 | Symbols: | RmlC-like cupins superfamily protein | chr4:6384564-6385946 FORWARD LENGTH=134	4	4	27.6	27.6	14.937	0	4.5841	24	NA	NA	NA	NA	NA	NA	65483000	126110000	NA	NA	72736000	48606000	103440000	115820000	170140000	136180000	135550000	99326000	NA	NA	NA
AT4G10480	AT4G10480.1;AT4G10480.2	AT4G10480.1 | Symbols: | Nascent polypeptide-associated complex (NAC), alpha subunit family protein | chr4:6478089-6479079 REVERSE LENGTH=212;AT4G10480.2 | Symbols: | Nascent polypeptide-associated complex (NAC), alpha subunit family protein | chr4:64780	7	7	42.5	42.5	23.171	0	193.54	219	NA	NA	NA	754560000	843020000	712320000	1024500000	1083500000	1395300000	987160000	951120000	1483100000	824060000	928760000	987610000	656560000	897770000	756080000	Q9SZY1	212	100
AT4G10840	AT4G10840.1;AT4G10840.2	AT4G10840.1 | Symbols: | Tetratricopeptide repeat (TPR)-like superfamily protein | chr4:6656614-6659033 FORWARD LENGTH=609;AT4G10840.2 | Symbols: | Tetratricopeptide repeat (TPR)-like superfamily protein | chr4:6656614-6658702 FORWARD LENGTH=531	3	3	5.9	5.9	66.28	0	17.364	26	NA	NA	NA	NA	NA	45075000	NA	NA	NA	26135000	22280000	98279000	NA	33673000	41099000	38146000	40337000	35013000	O81629	609	14.1
AT4G11010	AT4G11010.1;AT4G23900.1;AT4G23895.3	AT4G11010.1 | Symbols: NDPK3 | nucleoside diphosphate kinase 3 | chr4:6732780-6734298 REVERSE LENGTH=238;AT4G23900.1 | Symbols: | Nucleoside diphosphate kinase family protein | chr4:12424505-12426318 FORWARD LENGTH=237;AT4G23895.3 | Symbols: | Pleckstrin	6	6	30.7	30.7	25.734	0	13.447	24	NA	NA	NA	NA	NA	NA	NA	NA	NA	42772000	53258000	44064000	67120000	51027000	40534000	66604000	60790000	61257000	O49203	238	6.7
AT4G11150	AT4G11150.1;AT1G64200.1	AT4G11150.1 | Symbols: TUF, emb2448, TUFF, VHA-E1 | vacuolar ATP synthase subunit E1 | chr4:6800091-6801696 FORWARD LENGTH=230;AT1G64200.1 | Symbols: VHA-E3 | vacuolar H+-ATPase subunit E isoform 3 | chr1:23828537-23830002 REVERSE LENGTH=237	8	8	34.8	34.8	26.06	0	41.969	99	NA	NA	NA	162270000	153040000	94637000	203720000	222840000	184560000	198710000	198870000	93795000	131250000	113380000	170720000	150950000	159310000	149670000	Q39258	230	1.7
AT4G11260	AT4G11260.1	AT4G11260.1 | Symbols: ATSGT1B, ETA3, RPR1, EDM1, SGT1B | phosphatase-related | chr4:6851515-6853719 REVERSE LENGTH=358	5	5	15.6	15.6	39.762	0	9.8847	23	NA	NA	NA	43523000	51809000	83634000	60392000	56456000	61378000	54978000	58983000	77810000	NA	NA	NA	NA	NA	NA	Q9SUT5	358	32.4
AT4G11420	AT4G11420.1	AT4G11420.1 | Symbols: EIF3A, ATEIF3A-1, EIF3A-1, ATTIF3A1, TIF3A1 | eukaryotic translation initiation factor 3A | chr4:6947834-6952053 REVERSE LENGTH=987	5	5	7.8	7.8	114.3	0	6.1347	8	NA	NA	NA	NA	NA	NA	NA	44886000	40124000	NA	NA	NA	NA	NA	NA	NA	NA	NA	Q9LD55	987	32.3
AT4G11600	AT4G11600.1	AT4G11600.1 | Symbols: ATGPX6, PHGPX, LSC803, GPX6 | glutathione peroxidase 6 | chr4:7010021-7011330 REVERSE LENGTH=232	7	7	37.1	37.1	25.584	0	64.933	129	458650000	417240000	494190000	461980000	813620000	500090000	690810000	542140000	500300000	437360000	436800000	278670000	278510000	413190000	439010000	301280000	346440000	364290000	O48646	232	26.3
AT4G11740	AT4G11740.1	AT4G11740.1 | Symbols: SAY1 | Ubiquitin-like superfamily protein | chr4:7071955-7075256 FORWARD LENGTH=564	11	9	21.6	19	62.349	0	50.712	116	NA	NA	NA	185090000	193070000	158810000	161400000	181390000	151080000	133230000	133550000	133230000	115550000	129310000	122590000	117230000	91381000	110770000	F4JPR7	564	96.5
AT4G12290	AT4G12290.1	AT4G12290.1 | Symbols: | Copper amine oxidase family protein | chr4:7304434-7306973 FORWARD LENGTH=741	7	7	13.4	13.4	83.232	0	25.309	19	NA	NA	NA	107840000	152540000	88390000	NA	NA	104730000	NA	NA	NA	NA	NA	NA	NA	NA	NA	NA	NA	NA
AT4G12400	AT4G12400.2;AT4G12400.1	AT4G12400.2 | Symbols: Hop3 | stress-inducible protein, putative | chr4:7338866-7341239 REVERSE LENGTH=558;AT4G12400.1 | Symbols: Hop3 | stress-inducible protein, putative | chr4:7339024-7341239 REVERSE LENGTH=530	7	6	12.2	10.6	63.705	0	16.062	11	NA	NA	NA	39930000	62566000	83138000	50474000	30536000	34165000	NA	NA	NA	NA	NA	NA	NA	NA	NA	Q9STH1	558	23.1
AT4G12730	AT4G12730.1	AT4G12730.1 | Symbols: FLA2 | FASCICLIN-like arabinogalactan 2 | chr4:7491598-7492809 REVERSE LENGTH=403	6	6	25.3	25.3	43.448	0	193.01	178	NA	NA	NA	NA	NA	NA	159390000	189500000	149410000	428970000	391710000	430280000	498130000	520000000	715710000	679450000	689160000	701060000	Q9SU13	403	18.1
AT4G12770	AT4G12770.2;AT4G12770.1;AT4G12780.2;AT4G12780.1	AT4G12770.2 | Symbols: | Chaperone DnaJ-domain superfamily protein | chr4:7506736-7511408 REVERSE LENGTH=889;AT4G12770.1 | Symbols: | Chaperone DnaJ-domain superfamily protein | chr4:7506736-7511408 REVERSE LENGTH=891;AT4G12780.2 | Symbols: | Chaperone	3	3	4.4	4.4	98.158	0	5.9538	22	NA	NA	NA	NA	NA	NA	32372000	31399000	NA	38279000	39027000	46959000	28360000	28482000	31214000	NA	37368000	NA	Q0WQ57	891	97.8
AT4G12910	AT4G12910.1	AT4G12910.1 | Symbols: scpl20 | serine carboxypeptidase-like 20 | chr4:7550576-7553051 REVERSE LENGTH=497	12	12	25.4	25.4	55.832	0	110.07	109	NA	NA	NA	86621000	301980000	31557000	371530000	349100000	408110000	132870000	211010000	NA	27105000	90839000	64247000	30158000	47895000	35419000	Q8L7B2	497	0
AT4G13200	AT4G13200.1	AT4G13200.1 | Symbols: | unknown protein; FUNCTIONS IN: molecular_function unknown; INVOLVED IN: biological_process unknown; LOCATED IN: thylakoid, chloroplast thylakoid membrane, chloroplast, plastoglobule; EXPRESSED IN: 22 plant structures; EXPRESSED DU	5	5	34.6	34.6	20.429	0	50.109	78	NA	NA	NA	102130000	138510000	81062000	100830000	116460000	124080000	105000000	114180000	92137000	69337000	85332000	105530000	45381000	50104000	52559000	Q8LDV3	185	88.6
AT4G13850	AT4G13850.3;AT4G13850.2;AT4G13850.1;AT4G13850.4	AT4G13850.3 | Symbols: ATGRP2 | glycine-rich RNA-binding protein 2 | chr4:8021314-8022065 FORWARD LENGTH=144;AT4G13850.2 | Symbols: ATGRP2 | glycine-rich RNA-binding protein 2 | chr4:8021314-8022065 FORWARD LENGTH=153;AT4G13850.1 | Symbols: ATGRP2, GR-RBP2	5	5	34.7	34.7	14.691	0	137.73	344	368800000	371590000	400490000	2020000000	1789800000	1578300000	2340000000	2488800000	2289300000	1794800000	2272400000	1705600000	998950000	1432800000	1272800000	687170000	1033900000	757990000	Q9SVM8	158	37.3
AT4G13930	AT4G13930.1	AT4G13930.1 | Symbols: SHM4 | serine hydroxymethyltransferase 4 | chr4:8048013-8050021 REVERSE LENGTH=471	5	5	13.4	13.4	51.717	0	27.444	21	NA	NA	NA	NA	NA	NA	NA	NA	NA	NA	16938000	NA	58854000	NA	NA	37260000	NA	48989000	O23254	471	1.3
AT4G13940	AT4G13940.1;AT4G13940.4;AT4G13940.2;AT4G13940.3;AT3G23810.1	AT4G13940.1 | Symbols: HOG1, EMB1395, SAHH1, MEE58, ATSAHH1 | S-adenosyl-L-homocysteine hydrolase | chr4:8054931-8056676 FORWARD LENGTH=485;AT4G13940.4 | Symbols: HOG1, SAHH1 | S-adenosyl-L-homocysteine hydrolase | chr4:8054931-8056763 FORWARD LENGTH=325;A	11	11	28.2	28.2	53.378	0	46.239	58	NA	NA	103000000	NA	NA	NA	80186000	69234000	31989000	NA	57992000	63944000	311410000	50241000	67249000	80133000	46710000	108490000	O23255	485	2.5
AT4G14300	AT4G14300.1	AT4G14300.1 | Symbols: | RNA-binding (RRM/RBD/RNP motifs) family protein | chr4:8231179-8232785 FORWARD LENGTH=411	4	4	16.3	16.3	42.353	0	42.063	78	NA	NA	NA	NA	NA	NA	52110000	58907000	54400000	NA	69027000	34986000	44767000	55821000	75169000	71402000	82146000	68927000	Q8W034	411	48.4
AT4G14880	AT4G14880.4;AT4G14880.3;AT4G14880.2;AT4G14880.1	AT4G14880.4 | Symbols: OASA1 | O-acetylserine (thiol) lyase (OAS-TL) isoform A1 | chr4:8518209-8520050 REVERSE LENGTH=322;AT4G14880.3 | Symbols: OASA1 | O-acetylserine (thiol) lyase (OAS-TL) isoform A1 | chr4:8518209-8520050 REVERSE LENGTH=322;AT4G14880.2	4	4	20.5	20.5	33.805	0	28.585	22	NA	NA	49689000	NA	NA	NA	NA	NA	NA	28857000	NA	NA	84034000	48266000	NA	75367000	41216000	84835000	P47998	322	0
AT4G14890	AT4G14890.1	AT4G14890.1 | Symbols: FdC2 | 2Fe-2S ferredoxin-like superfamily protein | chr4:8520887-8521351 FORWARD LENGTH=154	3	3	26	26	16.732	0	33.741	73	NA	NA	NA	NA	NA	NA	65755000	NA	57639000	93527000	114450000	100710000	119210000	163950000	115650000	174980000	182450000	144790000	O23344	154	9.1
AT4G15410	AT4G15410.1	AT4G15410.1 | Symbols: PUX5 | serine/threonine protein phosphatase 2A 55 kDa regulatory subunit B prime gamma | chr4:8814868-8816596 FORWARD LENGTH=421	12	12	36.3	36.3	44.996	0	191.46	216	139870000	139970000	145550000	412830000	368660000	390320000	392570000	396810000	402530000	346310000	330300000	288890000	196540000	274150000	258560000	149850000	127340000	151930000	Q7Y175	421	95.7
AT4G15545	AT4G15545.1	AT4G15545.1 | Symbols: | unknown protein; BEST Arabidopsis thaliana protein match is: unknown protein (TAIR:AT1G16520.1); Has 30201 Blast hits to 17322 proteins in 780 species: Archae - 12; Bacteria - 1396; Metazoa - 17338; Fungi - 3422; Plants - 5037; Vi	12	12	42.7	42.7	37.206	0	240.56	100	NA	NA	NA	NA	NA	NA	NA	NA	NA	116960000	98945000	81369000	220390000	208460000	224070000	353090000	312540000	328160000	Q93W28	337	100
AT4G15790	AT4G15790.1	AT4G15790.1 | Symbols: | unknown protein; INVOLVED IN: biological_process unknown; LOCATED IN: chloroplast; EXPRESSED IN: 21 plant structures; EXPRESSED DURING: 13 growth stages; Has 411 Blast hits to 380 proteins in 121 species: Archae - 4; Bacteria - 10	3	3	24.5	24.5	16.53	0	13.325	30	NA	NA	NA	NA	NA	NA	28342000	51279000	47263000	52956000	46452000	55601000	37923000	32370000	52741000	41178000	42003000	43625000	NA	NA	NA
AT4G15802	AT4G15802.1	AT4G15802.1 | Symbols: HSBP, AtHSBP | heat shock factor binding protein | chr4:8986864-8988339 REVERSE LENGTH=86	3	3	40.7	40.7	9.3472	0	32.95	39	NA	NA	NA	NA	NA	NA	NA	NA	NA	156300000	175200000	113790000	132490000	143520000	116460000	141500000	116050000	132780000	Q8GW48	86	100
AT4G16155	AT4G16155.1;AT3G16950.1;AT3G16950.2	AT4G16155.1 | Symbols: | dihydrolipoyl dehydrogenases | chr4:9153570-9157322 REVERSE LENGTH=630;AT3G16950.1 | Symbols: LPD1, ptlpd1 | lipoamide dehydrogenase 1 | chr3:5786761-5790383 REVERSE LENGTH=570;AT3G16950.2 | Symbols: LPD1, ptlpd1 | lipoamide dehyd	9	9	21	21	67.089	0	24.642	28	92465000	81884000	99189000	NA	NA	60995000	NA	NA	NA	NA	NA	NA	60721000	NA	NA	NA	60801000	NA	F4JLP5	567	3.2
AT4G16500	AT4G16500.1	AT4G16500.1 | Symbols: | Cystatin/monellin superfamily protein | chr4:9301530-9301883 REVERSE LENGTH=117	4	4	35.9	35.9	12.556	0	24.508	112	329280000	426050000	239480000	129710000	162960000	152980000	424460000	427050000	463490000	321080000	293380000	243000000	199080000	232790000	253800000	297160000	205770000	265310000	Q84WT8	117	0
AT4G16660	AT4G16660.1	AT4G16660.1 | Symbols: | heat shock protein 70 (Hsp 70) family protein | chr4:9377225-9381232 FORWARD LENGTH=867	3	3	3.5	3.5	96.724	0	4.2357	17	NA	NA	NA	NA	NA	NA	NA	NA	NA	NA	28597000	65976000	NA	NA	NA	NA	NA	NA	F4JMJ1	867	28
AT4G16830	AT4G16830.1;AT4G16830.3;AT4G16830.2	AT4G16830.1 | Symbols: | Hyaluronan / mRNA binding family | chr4:9470621-9472308 FORWARD LENGTH=355;AT4G16830.3 | Symbols: | Hyaluronan / mRNA binding family | chr4:9470652-9472308 FORWARD LENGTH=345;AT4G16830.2 | Symbols: | Hyaluronan / mRNA binding fa	13	13	49.9	49.9	37.467	0	159.32	215	445830000	559660000	530180000	188710000	212540000	217110000	268980000	295760000	227610000	350970000	287520000	278350000	269090000	261760000	229880000	257150000	281090000	278190000	O23523	355	100
AT4G17330	AT4G17330.1	AT4G17330.1 | Symbols: ATG2484-1, G2484-1 | G2484-1 protein | chr4:9689263-9697172 REVERSE LENGTH=2037	10	10	6.3	6.3	218.07	0	24.908	28	NA	NA	NA	48716000	46061000	51294000	NA	37234000	43362000	34844000	NA	33747000	28414000	31290000	48249000	31128000	30264000	29340000	NA	NA	NA
AT4G17520	AT4G17520.1	AT4G17520.1 | Symbols: | Hyaluronan / mRNA binding family | chr4:9771496-9773313 FORWARD LENGTH=360	11	10	38.6	34.7	38.905	0	323.31	356	278490000	102550000	271030000	361840000	361210000	386940000	719240000	582380000	650610000	677700000	708730000	727170000	803000000	889250000	602340000	929310000	894810000	950510000	O23593	360	100
AT4G17890	AT4G17890.1;AT4G17890.2	AT4G17890.1 | Symbols: AGD8 | ARF-GAP domain 8 | chr4:9937121-9939146 FORWARD LENGTH=413;AT4G17890.2 | Symbols: AGD8 | ARF-GAP domain 8 | chr4:9937121-9938988 FORWARD LENGTH=384	4	4	12.8	12.8	44.441	0	34.213	42	NA	NA	NA	NA	NA	NA	45697000	17623000	40784000	40349000	47132000	52083000	32139000	36039000	44638000	29653000	21564000	26880000	Q8H100	413	49.4
AT4G18100	AT4G18100.1;AT5G46430.2;AT5G46430.1	AT4G18100.1 | Symbols: | Ribosomal protein L32e | chr4:10035715-10036475 REVERSE LENGTH=133;AT5G46430.2 | Symbols: | Ribosomal protein L32e | chr5:18833429-18834409 FORWARD LENGTH=133;AT5G46430.1 | Symbols: | Ribosomal protein L32e | chr5:18833429-18834	2	2	14.3	14.3	15.503	0	3.4594	8	NA	NA	NA	NA	NA	NA	NA	NA	NA	23716000	22261000	41497000	63836000	NA	NA	NA	NA	NA	P49211	133	22.6
AT4G18370	AT4G18370.1	AT4G18370.1 | Symbols: DEG5, DEGP5, HHOA | DEGP protease 5 | chr4:10149235-10151051 FORWARD LENGTH=323	3	3	11.8	11.8	34.923	0	5.0007	4	NA	NA	NA	NA	NA	NA	NA	NA	NA	NA	NA	NA	NA	NA	NA	19372000	25582000	NA	Q9SEL7	323	11.1
AT4G18480	AT4G18480.1	AT4G18480.1 | Symbols: CHLI1, CH42, CH-42, CHL11, CHLI-1 | P-loop containing nucleoside triphosphate hydrolases superfamily protein | chr4:10201897-10203361 REVERSE LENGTH=424	18	11	37.7	20	46.269	0	323.31	475	NA	NA	NA	475840000	417330000	420190000	628220000	795230000	665100000	1872500000	1941100000	1447900000	2359500000	2607300000	2796600000	3403900000	3840800000	3160600000	P16127	424	20.3
AT4G20050	AT4G20050.2;AT4G20050.1	AT4G20050.2 | Symbols: QRT3 | Pectin lyase-like superfamily protein | chr4:10849911-10852090 REVERSE LENGTH=481;AT4G20050.1 | Symbols: QRT3 | Pectin lyase-like superfamily protein | chr4:10849911-10852090 REVERSE LENGTH=481	4	4	10	10	51.658	0	12.489	15	NA	NA	NA	47317000	47702000	65489000	26953000	26094000	42894000	NA	NA	NA	NA	NA	NA	NA	NA	NA	O49432	481	1.9
AT4G20260	AT4G20260.3;AT4G20260.2;AT4G20260.1;AT4G20260.4;AT4G20260.6	AT4G20260.3 | Symbols: ATPCAP1, PCAP1 | plasma-membrane associated cation-binding protein 1 | chr4:10941593-10943227 FORWARD LENGTH=225;AT4G20260.2 | Symbols: ATPCAP1, PCAP1 | plasma-membrane associated cation-binding protein 1 | chr4:10941593-10943227 FOR	13	13	51.1	51.1	24.584	0	205.48	230	257550000	189230000	263940000	238820000	256750000	276050000	236770000	245520000	258620000	436220000	419670000	521820000	732020000	696620000	812110000	1400000000	1362100000	1308900000	Q96262	225	100
AT4G20360	AT4G20360.1	AT4G20360.1 | Symbols: ATRAB8D, ATRABE1B, RABE1b | RAB GTPase homolog E1B | chr4:10990036-10991466 FORWARD LENGTH=476	9	9	26.1	26.1	51.63	0	179.63	129	NA	NA	NA	125920000	45823000	109350000	136090000	136800000	125080000	236320000	228770000	271950000	364110000	248850000	263590000	413930000	373470000	347100000	P17745	476	9.5
AT4G20850	AT4G20850.1	AT4G20850.1 | Symbols: TPP2 | tripeptidyl peptidase ii | chr4:11160935-11169889 REVERSE LENGTH=1380	7	7	5.9	5.9	152.37	0	13.051	30	NA	NA	NA	29958000	26577000	46306000	46720000	33903000	NA	30501000	37655000	59850000	36655000	29142000	NA	NA	26186000	NA	NA	NA	NA
AT4G21020	AT4G21020.1	AT4G21020.1 | Symbols: | Late embryogenesis abundant protein (LEA) family protein | chr4:11228263-11229392 FORWARD LENGTH=266	19	19	46.2	46.2	29.422	0	270.09	356	2928800000	3715500000	4598400000	3173100000	3043800000	3476300000	1884800000	1840000000	2307300000	1190000000	1195300000	1759500000	692940000	580830000	1022600000	770410000	766850000	841740000	NA	NA	NA
AT4G21090	AT4G21090.3;AT4G21090.2;AT4G21090.1	AT4G21090.3 | Symbols: ATMFDX2, MFDX2 | MITOCHONDRIAL FERREDOXIN 2 | chr4:11256663-11258269 REVERSE LENGTH=197;AT4G21090.2 | Symbols: ATMFDX2, MFDX2 | MITOCHONDRIAL FERREDOXIN 2 | chr4:11256663-11258269 REVERSE LENGTH=197;AT4G21090.1 | Symbols: ATMFDX2,	5	3	25.9	15.7	22.121	0	8.1045	68	NA	NA	NA	143120000	126330000	141240000	185870000	153830000	176600000	163640000	154730000	148790000	129970000	135370000	149060000	157640000	132560000	142190000	Q8S904	197	20.8
AT4G21280	AT4G21280.1;AT4G21280.2	AT4G21280.1 | Symbols: PSBQ, PSBQA, PSBQ-1 | photosystem II subunit QA | chr4:11334446-11335587 FORWARD LENGTH=223;AT4G21280.2 | Symbols: PSBQ, PSBQA, PSBQ-1 | photosystem II subunit QA | chr4:11334446-11335587 FORWARD LENGTH=224	12	11	48	43.5	23.795	0	224.96	550	NA	NA	46311000	156960000	42597000	359130000	185190000	220430000	159020000	803390000	741560000	1217500000	2080000000	2067500000	1834100000	5181600000	3509300000	3611100000	Q9XFT3	224	21.4
AT4G21860	AT4G21860.3;AT4G21860.1;AT4G21860.2	AT4G21860.3 | Symbols: MSRB2 | methionine sulfoxide reductase B 2 | chr4:11600238-11601507 REVERSE LENGTH=202;AT4G21860.1 | Symbols: MSRB2 | methionine sulfoxide reductase B 2 | chr4:11600238-11601507 REVERSE LENGTH=202;AT4G21860.2 | Symbols: MSRB2 | methi	8	6	51.5	43.1	21.968	0	34.535	318	358830000	342880000	408030000	358620000	372340000	373010000	410890000	360550000	368130000	526870000	501590000	506390000	550940000	584630000	528680000	710710000	675520000	670470000	Q9C5C8	202	13.4
AT4G22220	AT4G22220.1	AT4G22220.1 | Symbols: ISU1, ATISU1 | SufE/NifU family protein | chr4:11759444-11760881 REVERSE LENGTH=167	2	2	16.2	16.2	17.914	0	6.3517	10	NA	NA	NA	NA	NA	NA	47092000	64373000	47567000	NA	NA	NA	NA	NA	NA	NA	NA	NA	O49627	167	22.8
AT4G22670	AT4G22670.1	AT4G22670.1 | Symbols: AtHip1, HIP1, TPR11 | HSP70-interacting protein 1 | chr4:11918236-11920671 FORWARD LENGTH=441	11	11	18.6	18.6	46.621	0	287.16	246	252070000	NA	201290000	619390000	1044100000	709410000	846320000	829460000	847050000	781360000	758800000	391520000	636650000	738940000	753200000	229510000	204230000	305240000	Q93YR3	441	62.8
AT4G23670	AT4G23670.1	AT4G23670.1 | Symbols: | Polyketide cyclase/dehydrase and lipid transport superfamily protein | chr4:12332846-12333656 REVERSE LENGTH=151	6	4	35.8	23.8	17.518	0	20.234	117	NA	NA	NA	NA	NA	NA	328690000	237870000	204100000	504120000	580390000	87503000	534250000	877160000	610720000	614180000	728650000	605760000	NA	NA	NA
AT4G23680	AT4G23680.1	AT4G23680.1 | Symbols: | Polyketide cyclase/dehydrase and lipid transport superfamily protein | chr4:12336416-12337417 REVERSE LENGTH=151	8	5	40.4	23.8	17.473	0	245.3	188	NA	NA	NA	1000000000	1675500000	899700000	1130000000	1197600000	942540000	1565500000	2297900000	409610000	1992500000	2493500000	1884700000	2226100000	2181200000	2141100000	NA	NA	NA
AT4G23710	AT4G23710.1	AT4G23710.1 | Symbols: VHA-G2, VAG2, VATG2 | vacuolar ATP synthase subunit G2 | chr4:12350577-12351354 FORWARD LENGTH=106	5	5	49.1	49.1	11.742	0	41.323	100	NA	NA	NA	NA	NA	147690000	265240000	317590000	273040000	379800000	338300000	315750000	263100000	258480000	272020000	305310000	267000000	259290000	O82629	106	100
AT4G24190	AT4G24190.2;AT4G24190.1	AT4G24190.2 | Symbols: SHD, AtHsp90.7, AtHsp90-7 | Chaperone protein htpG family protein | chr4:12551902-12555851 REVERSE LENGTH=823;AT4G24190.1 | Symbols: SHD, HSP90.7, AtHsp90.7, AtHsp90-7 | Chaperone protein htpG family protein | chr4:12551902-12555851	6	5	6.9	5.5	94.148	0	6.038	12	NA	NA	NA	NA	NA	NA	NA	NA	NA	NA	NA	NA	NA	NA	NA	41687000	36121000	NA	Q9STX5	823	30.3
AT4G24280	AT4G24280.1	AT4G24280.1 | Symbols: cpHsc70-1 | chloroplast heat shock protein 70-1 | chr4:12590094-12593437 FORWARD LENGTH=718	44	18	49.3	21.6	76.507	0	323.31	1245	88868000	53863000	83409000	1896700000	4393700000	3532700000	3855500000	3896400000	3874100000	6550500000	6933200000	3369900000	6733900000	7530300000	7930800000	7826100000	9420000000	7397300000	Q9STW6	718	36.9
AT4G24770	AT4G24770.1	AT4G24770.1 | Symbols: RBP31, ATRBP31, CP31, ATRBP33 | 31-kDa RNA binding protein | chr4:12766223-12767952 REVERSE LENGTH=329	9	9	21.6	21.6	35.787	0	54.322	421	NA	NA	NA	728430000	938830000	464430000	1146800000	1467400000	1027200000	3043600000	3297900000	835730000	2439600000	3226700000	2463300000	2006200000	2575300000	2343300000	Q04836	329	41.6
AT4G25050	AT4G25050.1;AT4G25050.2	AT4G25050.1 | Symbols: ACP4 | acyl carrier protein 4 | chr4:12870178-12871024 FORWARD LENGTH=137;AT4G25050.2 | Symbols: ACP4 | acyl carrier protein 4 | chr4:12870178-12871024 FORWARD LENGTH=149	3	3	37.2	37.2	14.544	0	60.132	240	NA	289990000	351590000	669370000	706250000	498610000	503480000	765840000	739340000	1063900000	696180000	724290000	837790000	1401300000	961850000	1583400000	1630000000	1581900000	Q9SW21	137	30.7
AT4G25130	AT4G25130.1	AT4G25130.1 | Symbols: PMSR4 | peptide met sulfoxide reductase 4 | chr4:12898802-12899998 REVERSE LENGTH=258	7	6	25.6	22.5	28.644	0	26.393	53	NA	72266000	NA	NA	NA	NA	63356000	44206000	46207000	94997000	108660000	41737000	74869000	89453000	142610000	82315000	74320000	84218000	P54150	258	4.7
AT4G25140	AT4G25140.1	AT4G25140.1 | Symbols: OLEO1, OLE1 | oleosin 1 | chr4:12900498-12901259 FORWARD LENGTH=173	2	2	13.9	13.9	18.569	0.0007776	2.6476	24	509120000	142640000	535080000	NA	NA	NA	NA	NA	NA	NA	NA	NA	NA	NA	NA	NA	NA	NA	P29525	173	38.7
AT4G25260	AT4G25260.1	AT4G25260.1 | Symbols: | Plant invertase/pectin methylesterase inhibitor superfamily protein | chr4:12936005-12936610 REVERSE LENGTH=201	2	2	11.4	11.4	22.173	0	5.8965	21	NA	NA	NA	NA	36235000	NA	50892000	NA	44569000	39682000	26477000	NA	NA	26141000	24587000	NA	34374000	23937000	Q9SB37	201	0
AT4G25580	AT4G25580.1	AT4G25580.1 | Symbols: | CAP160 protein | chr4:13056320-13058657 FORWARD LENGTH=626	28	28	48.4	48.4	66.519	0	323.31	328	4260800000	4006300000	4370000000	1050000000	913100000	1228400000	234580000	268960000	328020000	54227000	71463000	128980000	NA	NA	NA	NA	NA	NA	NA	NA	NA
AT4G25890	AT4G25890.1	AT4G25890.1 | Symbols: | 60S acidic ribosomal protein family | chr4:13159627-13160393 REVERSE LENGTH=119	4	2	28.6	14.3	11.849	0.0084034	1.8515	6	NA	NA	NA	NA	NA	NA	NA	46944000	NA	43563000	47444000	NA	NA	NA	NA	NA	NA	NA	Q9SVZ6	119	49.6
AT4G26110	AT4G26110.2;AT4G26110.1	AT4G26110.2 | Symbols: NAP1;1 | nucleosome assembly protein1;1 | chr4:13232712-13235060 FORWARD LENGTH=359;AT4G26110.1 | Symbols: NAP1;1, ATNAP1;1 | nucleosome assembly protein1;1 | chr4:13232712-13235502 FORWARD LENGTH=372	8	6	19.2	13.9	41.607	0	24.094	70	NA	NA	NA	NA	54592000	NA	114780000	125670000	103730000	112410000	164320000	110340000	118560000	118320000	NA	85091000	NA	NA	Q9SZI2	372	37.6
AT4G26500	AT4G26500.1	AT4G26500.1 | Symbols: EMB1374, CPSUFE, ATSUFE, SUFE1 | chloroplast sulfur E | chr4:13382456-13383571 REVERSE LENGTH=371	5	5	19.9	19.9	40.833	0	20.106	12	NA	NA	NA	NA	NA	69933000	NA	NA	NA	NA	33716000	67844000	NA	NA	NA	NA	NA	NA	Q84W65	371	48
AT4G26630	AT4G26630.2;AT4G26630.1	AT4G26630.2 | Symbols: | DEK domain-containing chromatin associated protein | chr4:13430873-13434877 REVERSE LENGTH=763;AT4G26630.1 | Symbols: | DEK domain-containing chromatin associated protein | chr4:13430873-13434877 REVERSE LENGTH=763	3	3	4.2	4.2	85.248	0	5.9828	20	NA	NA	NA	NA	NA	NA	NA	42720000	45016000	NA	41796000	101230000	55226000	42640000	49211000	59476000	67964000	40658000	NA	NA	NA
AT4G26780	AT4G26780.1	AT4G26780.1 | Symbols: AR192 | Co-chaperone GrpE family protein | chr4:13485066-13486560 REVERSE LENGTH=327	9	9	33	33	36.116	0	162.44	141	NA	NA	NA	522520000	398280000	507570000	410920000	362770000	433700000	345020000	388690000	393570000	216270000	306880000	273280000	82503000	106750000	85768000	Q8LB47	327	42.5
AT4G27000	AT4G27000.1	AT4G27000.1 | Symbols: ATRBP45C | RNA-binding (RRM/RBD/RNP motifs) family protein | chr4:13554983-13557763 REVERSE LENGTH=415	5	5	13.3	13.3	44.972	0	15.822	16	NA	NA	NA	NA	NA	NA	NA	NA	NA	29456000	43632000	31139000	NA	NA	NA	NA	NA	NA	Q93W34	415	56.1
AT4G27140	AT4G27140.1	AT4G27140.1 | Symbols: SESA1, AT2S1 | seed storage albumin 1 | chr4:13607363-13607857 FORWARD LENGTH=164	4	4	23.2	23.2	19.014	0	234.64	278	18900000000	19500000000	13700000000	12600000000	5462900000	12000000000	2421400000	2865100000	2582600000	1331200000	1665800000	2456400000	455550000	725530000	480110000	536710000	538070000	341790000	P15457	164	14.6
AT4G27150	AT4G27150.1	AT4G27150.1 | Symbols: SESA2, AT2S2 | seed storage albumin 2 | chr4:13609396-13609908 FORWARD LENGTH=170	7	2	38.8	20.6	19.361	0	323.31	765	143000000000	140000000000	98200000000	24200000000	22800000000	14800000000	14000000000	12100000000	13300000000	5000000000	8739800000	10800000000	2200400000	3399100000	2580000000	1664300000	2590000000	2421800000	P15458	170	5.9
AT4G27160	AT4G27160.1	AT4G27160.1 | Symbols: AT2S3, SESA3 | seed storage albumin 3 | chr4:13611836-13612330 FORWARD LENGTH=164	6	2	28.7	9.8	18.762	0	139.59	138	34000000000	33500000000	21000000000	4635200000	4662500000	2621100000	NA	NA	NA	NA	NA	NA	NA	NA	NA	NA	NA	NA	P15459	164	7.9
AT4G27170	AT4G27170.1	AT4G27170.1 | Symbols: SESA4, AT2S4 | seed storage albumin 4 | chr4:13613637-13614137 FORWARD LENGTH=166	6	4	28.3	24.1	19.169	0	323.31	363	73500000000	54200000000	55400000000	9890800000	5867600000	5682200000	5270300000	5702400000	5853100000	1747100000	2790000000	3771700000	465420000	964190000	411400000	324480000	623410000	538280000	P15460	166	7.8
AT4G27520	AT4G27520.1	AT4G27520.1 | Symbols: ENODL2, AtENODL2 | early nodulin-like protein 2 | chr4:13750668-13751819 REVERSE LENGTH=349	10	10	27.5	27.5	35.064	0	234.96	344	448000000	389240000	381410000	501970000	485680000	611330000	393840000	335730000	420070000	415760000	352270000	733390000	741330000	681180000	725360000	1087100000	1024600000	1137500000	Q9T076	349	61
AT4G27530	AT4G27530.1	AT4G27530.1 | Symbols: | unknown protein; BEST Arabidopsis thaliana protein match is: unknown protein (TAIR:AT5G53895.1); Has 14 Blast hits to 14 proteins in 3 species: Archae - 0; Bacteria - 0; Metazoa - 0; Fungi - 0; Plants - 14; Viruses - 0; Other Euka	2	2	27.7	27.7	13.548	0	136.44	39	221650000	170500000	250700000	142230000	103230000	183180000	97099000	121090000	113600000	95587000	91524000	92651000	NA	NA	NA	NA	NA	NA	NA	NA	NA
AT4G28080	AT4G28080.1	AT4G28080.1 | Symbols: | Tetratricopeptide repeat (TPR)-like superfamily protein | chr4:13948993-13957840 REVERSE LENGTH=1819	13	13	8.6	8.6	199.11	0	57.985	150	NA	NA	NA	43573000	50390000	85020000	95655000	88533000	68707000	288940000	194460000	347770000	401380000	358760000	365530000	576300000	517010000	563070000	NA	NA	NA
AT4G28300	AT4G28300.2;AT4G28300.1	AT4G28300.2 | Symbols: | Protein of unknown function (DUF1421) | chr4:14015414-14016823 FORWARD LENGTH=438;AT4G28300.1 | Symbols: | Protein of unknown function (DUF1421) | chr4:14014860-14016823 FORWARD LENGTH=496	5	5	11.2	11.2	47.993	0	7.4643	25	NA	NA	NA	NA	NA	NA	52400000	43311000	NA	59407000	51949000	NA	54960000	54413000	NA	49567000	55329000	NA	NA	NA	NA
AT4G28520	AT4G28520.1;AT4G28520.2;AT4G28520.4;AT4G28520.3	AT4G28520.1 | Symbols: CRU3, CRC | cruciferin 3 | chr4:14087596-14089617 FORWARD LENGTH=524;AT4G28520.2 | Symbols: CRU3, CRC | cruciferin 3 | chr4:14087596-14089229 FORWARD LENGTH=394;AT4G28520.4 | Symbols: CRU3, CRC | cruciferin 3 | chr4:14087596-14089229	36	36	80	80	58.235	0	323.31	4585	272000000000	385000000000	149000000000	151000000000	98700000000	59900000000	59900000000	57300000000	57400000000	38300000000	38600000000	50300000000	15700000000	16100000000	13700000000	12400000000	10300000000	14400000000	Q96318	524	23.5
AT4G28660	AT4G28660.1;AT4G28660.2	AT4G28660.1 | Symbols: PSB28 | photosystem II reaction center PSB28 protein | chr4:14150008-14150933 FORWARD LENGTH=183;AT4G28660.2 | Symbols: PSB28 | photosystem II reaction center PSB28 protein | chr4:14150008-14150933 FORWARD LENGTH=198	3	3	20.2	20.2	20.192	0	22.045	40	NA	NA	NA	82824000	NA	70730000	76249000	97172000	68504000	137580000	169070000	95568000	184980000	117930000	78110000	205300000	162910000	214570000	Q8W0Y8	183	12
AT4G29060	AT4G29060.1;AT4G29060.2	AT4G29060.1 | Symbols: emb2726 | elongation factor Ts family protein | chr4:14317744-14321315 FORWARD LENGTH=953;AT4G29060.2 | Symbols: emb2726 | elongation factor Ts family protein | chr4:14317744-14321315 FORWARD LENGTH=709	29	29	35.9	35.9	103.78	0	323.31	622	NA	NA	NA	622570000	810950000	941340000	991990000	997540000	892610000	1456700000	1559500000	1141200000	2092600000	2027300000	2399500000	2574400000	2680000000	2458800000	Q9SZD6	953	42.3
AT4G29160	AT4G29160.3;AT4G29160.1;AT4G29160.2	AT4G29160.3 | Symbols: SNF7.1 | SNF7 family protein | chr4:14381019-14382342 FORWARD LENGTH=219;AT4G29160.1 | Symbols: SNF7.1 | SNF7 family protein | chr4:14381019-14382342 FORWARD LENGTH=219;AT4G29160.2 | Symbols: SNF7.1 | SNF7 family protein | chr4:14381	4	2	20.5	11.9	24.333	0	8.189	32	NA	NA	NA	NA	NA	NA	NA	NA	NA	NA	39056000	75338000	NA	NA	NA	79774000	78817000	88913000	Q9SZE4	219	100
AT4G29350	AT4G29350.1	AT4G29350.1 | Symbols: PFN2, PRO2, PRF2 | profilin 2 | chr4:14450135-14451119 FORWARD LENGTH=131	6	3	39.7	32.1	13.998	0	89.084	72	NA	NA	NA	100270000	193440000	136490000	222860000	255310000	234530000	390890000	355980000	117690000	245260000	274290000	305800000	202310000	249220000	226160000	Q42418	131	0
AT4G30160	AT4G30160.1;AT4G30160.2	AT4G30160.1 | Symbols: VLN4, ATVLN4 | villin 4 | chr4:14754528-14759511 FORWARD LENGTH=974;AT4G30160.2 | Symbols: VLN4 | villin 4 | chr4:14754528-14759511 FORWARD LENGTH=983	5	5	6.2	6.2	109.33	0	28.238	35	NA	NA	NA	NA	NA	41211000	44989000	43975000	43947000	42759000	32883000	72653000	44455000	48702000	52512000	63887000	50668000	46270000	O65570	974	17
AT4G30880	AT4G30880.1	AT4G30880.1 | Symbols: | Bifunctional inhibitor/lipid-transfer protein/seed storage 2S albumin superfamily protein | chr4:15035229-15035750 FORWARD LENGTH=109	6	6	56	56	11.46	0	96.58	221	2890000000	3101900000	2671600000	1307100000	1223500000	2347200000	928200000	939750000	883060000	411280000	484530000	572630000	197620000	263000000	269650000	205270000	220030000	197630000	NA	NA	NA
AT4G31700	AT4G31700.1;AT4G31700.2;AT5G10360.2;AT5G10360.1	AT4G31700.1 | Symbols: RPS6, RPS6A | ribosomal protein S6 | chr4:15346306-15347714 REVERSE LENGTH=250;AT4G31700.2 | Symbols: RPS6, RPS6A | ribosomal protein S6 | chr4:15346306-15347075 REVERSE LENGTH=188;AT5G10360.2 | Symbols: EMB3010 | Ribosomal protein S	8	8	37.2	37.2	28.367	0	23.52	98	NA	NA	NA	141150000	NA	NA	157070000	177680000	93052000	NA	105680000	382240000	238520000	94535000	129390000	141490000	62418000	163760000	O48549	250	60.4
AT4G31840	AT4G31840.1	AT4G31840.1 | Symbols: ENODL15, AtENODL15 | early nodulin-like protein 15 | chr4:15401798-15402426 FORWARD LENGTH=177	7	7	38.4	38.4	18.961	0	12.874	176	438020000	345210000	278790000	428040000	428980000	494650000	269660000	314560000	370580000	305950000	271270000	548610000	393000000	365530000	443450000	457010000	496550000	476200000	NA	NA	NA
AT4G31880	AT4G31880.2;AT4G31880.1	AT4G31880.2 | Symbols: | LOCATED IN: cytosol; EXPRESSED IN: 24 plant structures; EXPRESSED DURING: 14 growth stages; BEST Arabidopsis thaliana protein match is: Tudor/PWWP/MBT superfamily protein (TAIR:AT1G15940.1). | chr4:15419435-15423939 REVERSE LENGTH	6	5	8.4	6.8	94.08	0	9.4652	16	NA	NA	NA	NA	NA	NA	NA	22008000	NA	NA	NA	NA	NA	26030000	NA	NA	32781000	18510000	NA	NA	NA
AT4G32330	AT4G32330.2;AT4G32330.3;AT4G32330.1	AT4G32330.2 | Symbols: | TPX2 (targeting protein for Xklp2) protein family | chr4:15609801-15611867 FORWARD LENGTH=436;AT4G32330.3 | Symbols: | TPX2 (targeting protein for Xklp2) protein family | chr4:15609801-15611867 FORWARD LENGTH=437;AT4G32330.1 | Sy	4	4	12.2	12.2	47.455	0	12.981	31	NA	NA	NA	NA	NA	NA	30589000	37523000	37277000	54772000	60345000	48810000	47125000	46914000	53010000	49524000	57355000	44517000	Q94C48	437	100
AT4G32590	AT4G32590.1;AT4G32590.3;AT4G32590.2;AT4G32590.4	AT4G32590.1 | Symbols: | 2Fe-2S ferredoxin-like superfamily protein | chr4:15721417-15722776 FORWARD LENGTH=173;AT4G32590.3 | Symbols: | 2Fe-2S ferredoxin-like superfamily protein | chr4:15721417-15722781 FORWARD LENGTH=180;AT4G32590.2 | Symbols: | 2Fe-	2	2	11	11	18.663	0.0071429	1.9945	10	NA	NA	NA	NA	NA	NA	NA	NA	NA	NA	NA	NA	32068000	24999000	NA	NA	36602000	49281000	NA	NA	NA
AT4G32720	AT4G32720.2;AT4G32720.1	AT4G32720.2 | Symbols: AtLa1, La1 | La protein 1 | chr4:15787313-15789498 FORWARD LENGTH=404;AT4G32720.1 | Symbols: AtLa1, La1 | La protein 1 | chr4:15787313-15789683 FORWARD LENGTH=433	8	8	22.5	22.5	44.968	0	18.643	50	NA	NA	NA	160200000	137930000	171960000	90286000	74741000	81338000	65669000	74206000	76731000	36185000	43000000	NA	NA	NA	NA	Q93ZV7	433	40.9
AT4G32760	AT4G32760.1;AT4G32760.2	AT4G32760.1 | Symbols: | ENTH/VHS/GAT family protein | chr4:15799376-15803832 FORWARD LENGTH=675;AT4G32760.2 | Symbols: | ENTH/VHS/GAT family protein | chr4:15799376-15803832 FORWARD LENGTH=676	2	2	4.9	4.9	72.963	0	4.7453	16	NA	NA	NA	NA	NA	NA	45891000	47201000	46890000	35315000	38383000	NA	48452000	NA	NA	33225000	NA	NA	Q8L860	675	54.1
AT4G32915	AT4G32915.1	AT4G32915.1 | Symbols: | FUNCTIONS IN: molecular_function unknown; INVOLVED IN: regulation of translational fidelity; LOCATED IN: chloroplast; EXPRESSED IN: 22 plant structures; EXPRESSED DURING: 13 growth stages; CONTAINS InterPro DOMAIN/s: Glu-tRNAGln a	5	5	48.4	48.4	17.518	0	158.33	71	NA	NA	NA	54271000	NA	41197000	55414000	56411000	44662000	85421000	103730000	131320000	134160000	191850000	96986000	189630000	192930000	182920000	F4JV80	155	20.6
AT4G32930	AT4G32930.1;AT4G32930.2	AT4G32930.1 | Symbols: | unknown protein; CONTAINS InterPro DOMAIN/s: Protein of unknown function DUF866, eukaryotic (InterPro:IPR008584); Has 30201 Blast hits to 17322 proteins in 780 species: Archae - 12; Bacteria - 1396; Metazoa - 17338; Fungi - 3422;	3	3	22.8	22.8	18.466	0	26.577	17	NA	NA	NA	NA	NA	NA	38232000	NA	39971000	NA	NA	NA	23692000	30153000	NA	17589000	NA	28790000	NA	NA	NA
AT4G33500	AT4G33500.1	AT4G33500.1 | Symbols: | Protein phosphatase 2C family protein | chr4:16112835-16116243 REVERSE LENGTH=724	4	4	6.2	6.2	78.923	0	13.339	20	NA	NA	NA	NA	NA	NA	NA	NA	NA	NA	NA	50249000	44235000	47383000	43472000	67274000	57749000	54507000	Q93V88	724	53.5
AT4G33640	AT4G33640.1	AT4G33640.1 | Symbols: | unknown protein; Has 30201 Blast hits to 17322 proteins in 780 species: Archae - 12; Bacteria - 1396; Metazoa - 17338; Fungi - 3422; Plants - 5037; Viruses - 0; Other Eukaryotes - 2996 (source: NCBI BLink). | chr4:16159727-1616021	4	4	49.5	49.5	10.42	0	31.917	52	NA	NA	NA	NA	70993000	NA	83732000	76265000	NA	102620000	94006000	45306000	48224000	61483000	92318000	51427000	66348000	55461000	Q8LBN7	95	18.9
AT4G33865	AT4G33865.1;AT3G44010.1;AT3G43980.1	AT4G33865.1 | Symbols: | Ribosomal protein S14p/S29e family protein | chr4:16233395-16234114 REVERSE LENGTH=56;AT3G44010.1 | Symbols: | Ribosomal protein S14p/S29e family protein | chr3:15800175-15801132 REVERSE LENGTH=56;AT3G43980.1 | Symbols: | Riboso	2	2	30.4	30.4	6.4294	0.00076923	2.5636	11	NA	NA	NA	NA	NA	NA	67483000	84151000	NA	NA	NA	NA	71100000	NA	NA	NA	NA	NA	Q680P8	56	7.1
AT4G34120	AT4G34120.1	AT4G34120.1 | Symbols: LEJ1, CDCP1 | Cystathionine beta-synthase (CBS) family protein | chr4:16341194-16342893 FORWARD LENGTH=238	4	4	13.9	13.9	25.955	0	7.0193	14	NA	NA	NA	NA	NA	NA	NA	NA	NA	NA	30597000	NA	48076000	43773000	NA	47143000	40008000	NA	Q9C5D0	238	2.1
AT4G34870	AT4G34870.1	AT4G34870.1 | Symbols: ROC5, ATCYP1 | rotamase cyclophilin 5 | chr4:16614451-16614969 FORWARD LENGTH=172	6	5	39.5	35.5	18.378	0	37.895	48	85848000	120340000	113020000	NA	75298000	183640000	88220000	102780000	79304000	79206000	76906000	NA	NA	54683000	97561000	63670000	NA	65650000	Q42406	172	0
AT4G35090	AT4G35090.1;AT4G35090.2	AT4G35090.1 | Symbols: CAT2 | catalase 2 | chr4:16700937-16703215 REVERSE LENGTH=492;AT4G35090.2 | Symbols: CAT2 | catalase 2 | chr4:16701105-16703215 REVERSE LENGTH=474	12	6	30.7	15.2	56.931	0	85.876	56	NA	NA	NA	91163000	72804000	52198000	62877000	62418000	33134000	NA	55672000	52290000	211320000	36277000	52411000	62429000	50664000	83632000	P25819	492	4.3
AT4G35450	AT4G35450.3;AT4G35450.2;AT4G35450.1;AT4G35450.5;AT4G35450.4	AT4G35450.3 | Symbols: AKR2, AFT, AKR2A | ankyrin repeat-containing protein 2 | chr4:16839862-16841759 FORWARD LENGTH=342;AT4G35450.2 | Symbols: AKR2, AFT, AKR2A | ankyrin repeat-containing protein 2 | chr4:16839862-16841759 FORWARD LENGTH=342;AT4G35450.1	13	10	37.7	31.6	36.984	0	189.41	441	375210000	156530000	309370000	1240200000	1006200000	963760000	1103800000	1264100000	1307400000	1549300000	1442900000	1858300000	1514900000	1529400000	1413600000	1718100000	1757800000	1850000000	Q9SAR5	342	38.3
AT4G35570	AT4G35570.1	AT4G35570.1 | Symbols: HMGB5, NFD5, HMGD, NFD05 | high mobility group B5 | chr4:16887363-16888184 REVERSE LENGTH=125	3	3	26.4	26.4	14.203	0	7.1025	41	78234000	75810000	64119000	116790000	66122000	108010000	66879000	59550000	68205000	NA	40592000	65447000	NA	NA	NA	42363000	NA	NA	O49597	125	100
AT4G36020	AT4G36020.1	AT4G36020.1 | Symbols: CSDP1 | cold shock domain protein 1 | chr4:17043443-17044342 REVERSE LENGTH=299	12	12	51.5	51.5	30.087	0	43.214	133	NA	NA	NA	205410000	255500000	NA	240360000	220710000	235820000	157010000	196210000	46450000	163120000	155650000	154730000	137120000	135030000	137230000	O65639	299	18.7
AT4G36600	AT4G36600.1	AT4G36600.1 | Symbols: | Late embryogenesis abundant (LEA) protein | chr4:17263666-17264968 FORWARD LENGTH=353	5	5	16.1	16.1	37.959	0	121.16	56	385260000	285840000	346030000	146180000	125390000	157890000	56591000	47695000	73154000	37132000	NA	62960000	NA	NA	NA	NA	NA	NA	NA	NA	NA
AT4G36700	AT4G36700.1	AT4G36700.1 | Symbols: | RmlC-like cupins superfamily protein | chr4:17298443-17300337 REVERSE LENGTH=522	5	4	10.3	10.2	59.084	0	82.207	75	NA	NA	NA	62663000	221670000	47726000	90574000	106040000	125630000	168900000	134660000	45112000	109970000	115390000	101330000	54890000	66165000	73220000	F4JQG6	522	31.2
AT4G36880	AT4G36880.1	AT4G36880.1 | Symbols: CP1 | cysteine proteinase1 | chr4:17374692-17376180 REVERSE LENGTH=376	12	12	38.8	38.8	41.638	0	99.395	284	NA	NA	NA	332560000	431130000	297780000	1227700000	1222500000	1271500000	723910000	780030000	353950000	322490000	482060000	494430000	394280000	375990000	334690000	Q94B08	376	8
AT4G36910	AT4G36910.1	AT4G36910.1 | Symbols: LEJ2, CDCP2 | Cystathionine beta-synthase (CBS) family protein | chr4:17391016-17393218 REVERSE LENGTH=236	5	5	30.9	30.9	25.768	0	107.64	120	NA	NA	NA	161800000	212580000	136770000	166360000	155830000	177510000	178610000	200880000	146830000	183260000	210670000	167490000	175830000	205880000	201310000	O23193	236	3.8
AT4G36945	AT4G36945.1	AT4G36945.1 | Symbols: | PLC-like phosphodiesterases superfamily protein | chr4:17420098-17422047 REVERSE LENGTH=408	4	4	9.6	9.6	44.331	0	6.0388	19	NA	NA	NA	NA	NA	NA	35212000	36296000	36069000	45151000	39590000	34484000	NA	NA	NA	NA	38712000	46242000	NA	NA	NA
AT4G37210	AT4G37210.2;AT4G37210.1	AT4G37210.2 | Symbols: | Tetratricopeptide repeat (TPR)-like superfamily protein | chr4:17512376-17514072 FORWARD LENGTH=377;AT4G37210.1 | Symbols: | Tetratricopeptide repeat (TPR)-like superfamily protein | chr4:17512376-17514421 FORWARD LENGTH=492	5	5	15.9	15.9	40.592	0	13.786	35	NA	NA	NA	NA	56086000	NA	67161000	53666000	56350000	43126000	37580000	NA	NA	44190000	NA	NA	NA	29243000	NA	NA	NA
AT4G37300	AT4G37300.1	AT4G37300.1 | Symbols: MEE59 | maternal effect embryo arrest 59 | chr4:17554805-17555498 FORWARD LENGTH=173	8	8	68.2	68.2	18.815	0	73.381	204	322540000	206050000	377750000	446100000	407590000	457790000	414140000	445550000	441040000	460080000	401380000	628000000	658960000	696270000	720480000	999700000	771050000	883030000	NA	NA	NA
AT4G37870	AT4G37870.1	AT4G37870.1 | Symbols: PCK1, PEPCK | phosphoenolpyruvate carboxykinase 1 | chr4:17802974-17806332 REVERSE LENGTH=671	15	15	28.9	28.9	73.404	0	323.31	175	NA	NA	NA	466180000	384850000	1000200000	343270000	451590000	473990000	178120000	337080000	464800000	191800000	226690000	242270000	168320000	176420000	136420000	Q9T074	671	20.7
AT4G37910	AT4G37910.1	AT4G37910.1 | Symbols: mtHsc70-1 | mitochondrial heat shock protein 70-1 | chr4:17825368-17828099 REVERSE LENGTH=682	12	10	17	14.2	73.074	0	177.83	112	NA	NA	NA	296600000	225890000	564120000	304040000	333130000	324870000	156440000	200300000	408430000	147960000	143620000	159300000	176510000	153570000	160660000	Q8GUM2	682	33
AT4G37930	AT4G37930.1;AT5G26780.1;AT5G26780.3;AT5G26780.2	AT4G37930.1 | Symbols: SHM1, STM, SHMT1 | serine transhydroxymethyltransferase 1 | chr4:17831891-17834742 REVERSE LENGTH=517;AT5G26780.1 | Symbols: SHM2 | serine hydroxymethyltransferase 2 | chr5:9418299-9421725 FORWARD LENGTH=517;AT5G26780.3 | Symbols: SH	3	3	5.8	5.8	57.4	0	8.5544	4	NA	NA	NA	NA	NA	NA	NA	NA	NA	NA	NA	NA	25434000	11932000	NA	NA	NA	NA	Q9SZJ5	517	6.4
AT4G38350	AT4G38350.1;AT4G38350.2	AT4G38350.1 | Symbols: | Patched family protein | chr4:17958324-17966846 REVERSE LENGTH=1273;AT4G38350.2 | Symbols: | Patched family protein | chr4:17958324-17966846 REVERSE LENGTH=1297	6	6	7.5	7.5	139.97	0	47.044	81	105630000	115290000	62465000	185090000	153080000	170390000	90381000	101480000	116110000	84680000	72155000	124280000	55641000	65484000	NA	75126000	63741000	61551000	NA	NA	NA
AT4G38630	AT4G38630.1	AT4G38630.1 | Symbols: RPN10, MCB1, ATMCB1, MBP1 | regulatory particle non-ATPase 10 | chr4:18057357-18059459 REVERSE LENGTH=386	6	6	21.2	21.2	40.757	0	153.44	139	NA	NA	86868000	260030000	441430000	222240000	322960000	301540000	330260000	325610000	299760000	206130000	253400000	290420000	286820000	298790000	275510000	286580000	P55034	386	46.9
AT4G38680	AT4G38680.1	AT4G38680.1 | Symbols: GRP2, CSDP2, CSP2, ATCSP2 | glycine rich protein 2 | chr4:18072240-18072851 REVERSE LENGTH=203	4	4	42.9	42.9	19.153	0	312.6	797	236000000	332980000	374080000	NA	335720000	NA	250440000	282880000	311590000	402790000	437320000	179990000	382290000	460700000	458980000	346530000	375090000	346740000	Q41188	203	100
AT4G38710	AT4G38710.1;AT4G38710.2	AT4G38710.1 | Symbols: | glycine-rich protein | chr4:18078141-18080002 REVERSE LENGTH=452;AT4G38710.2 | Symbols: | glycine-rich protein | chr4:18078141-18080002 REVERSE LENGTH=465	22	22	58.8	58.8	48.987	0	323.31	360	NA	NA	NA	672650000	545800000	865190000	590080000	577180000	662230000	572460000	543520000	600230000	406870000	493940000	403230000	358120000	364960000	393140000	Q9SZP8	452	100
AT4G38740	AT4G38740.1	AT4G38740.1 | Symbols: ROC1 | rotamase CYP 1 | chr4:18083620-18084138 REVERSE LENGTH=172	10	4	52.3	34.3	18.373	0	81.286	268	868710000	1043900000	1192500000	943220000	980190000	1028100000	1012500000	1000000000	934170000	1070000000	972180000	485070000	493640000	570980000	560010000	418990000	499170000	418620000	P34790	172	0
AT4G38810	AT4G38810.2;AT4G38810.1	AT4G38810.2 | Symbols: | Calcium-binding EF-hand family protein | chr4:18115607-18118860 REVERSE LENGTH=375;AT4G38810.1 | Symbols: | Calcium-binding EF-hand family protein | chr4:18115607-18116999 REVERSE LENGTH=265	7	7	23.7	23.7	41.156	0	101.91	118	146830000	NA	153140000	251360000	489800000	235290000	228650000	216070000	292440000	212680000	226880000	146460000	145450000	163050000	165050000	178850000	179290000	185260000	NA	NA	NA
AT4G38970	AT4G38970.1;AT4G38970.2	AT4G38970.1 | Symbols: FBA2 | fructose-bisphosphate aldolase 2 | chr4:18163714-18165659 REVERSE LENGTH=398;AT4G38970.2 | Symbols: FBA2 | fructose-bisphosphate aldolase 2 | chr4:18163769-18165659 REVERSE LENGTH=381	14	8	40.7	25.4	42.987	0	198.27	81	NA	NA	NA	NA	NA	110390000	NA	NA	NA	NA	NA	176490000	522840000	100520000	126300000	276210000	151460000	334240000	Q944G9	398	9
AT4G39090	AT4G39090.1	AT4G39090.1 | Symbols: RD19, RD19A | Papain family cysteine protease | chr4:18215826-18217326 REVERSE LENGTH=368	3	3	9.2	9.2	40.418	0	16.352	47	NA	NA	NA	NA	NA	NA	66050000	78897000	65133000	57616000	63959000	NA	45984000	57087000	NA	30524000	41994000	NA	P43296	368	6.3
AT4G39200	AT4G39200.2;AT2G21580.2;AT4G39200.1;AT4G34555.1;AT2G21580.1;AT2G16360.1	AT4G39200.2 | Symbols: | Ribosomal protein S25 family protein | chr4:18257464-18258464 FORWARD LENGTH=107;AT2G21580.2 | Symbols: | Ribosomal protein S25 family protein | chr2:9236629-9237510 FORWARD LENGTH=107;AT4G39200.1 | Symbols: | Ribosomal protein	2	2	18.7	18.7	11.925	0	10.168	60	NA	NA	NA	180970000	91436000	NA	182690000	94522000	105210000	82027000	58942000	327360000	98674000	73685000	89378000	109060000	66867000	NA	Q9T029	108	56.5
AT4G39260	AT4G39260.1;AT4G39260.4;AT4G39260.3;AT4G39260.2	AT4G39260.1 | Symbols: CCR1, ATGRP8, GR-RBP8, GRP8 | cold, circadian rhythm, and RNA binding 1 | chr4:18274166-18274958 REVERSE LENGTH=169;AT4G39260.4 | Symbols: CCR1, ATGRP8, GR-RBP8, GRP8 | cold, circadian rhythm, and RNA binding 1 | chr4:18274166-182749	11	8	63.9	56.2	16.578	0	323.31	305	770050000	739110000	723060000	688530000	960690000	755230000	2012400000	1680000000	1564200000	2050500000	1974300000	988790000	1810000000	2608100000	1884800000	2407500000	1962600000	2566400000	Q03251	169	64.5
AT4G39680	AT4G39680.2;AT4G39680.1	AT4G39680.2 | Symbols: | SAP domain-containing protein | chr4:18414604-18416938 REVERSE LENGTH=633;AT4G39680.1 | Symbols: | SAP domain-containing protein | chr4:18414604-18416938 REVERSE LENGTH=633	11	11	21.2	21.2	69.441	0	73.928	77	NA	NA	NA	114770000	114400000	167890000	121270000	141140000	150790000	84639000	85880000	172160000	64466000	105700000	79272000	77186000	83479000	75117000	NA	NA	NA
AT4G39860	AT4G39860.2;AT4G39860.1	AT4G39860.2 | Symbols: | unknown protein; BEST Arabidopsis thaliana protein match is: unknown protein (TAIR:AT2G22270.1); Has 148 Blast hits to 144 proteins in 18 species: Archae - 0; Bacteria - 0; Metazoa - 0; Fungi - 0; Plants - 144; Viruses - 0; Other	9	8	40.9	37.6	31.949	0	68.344	84	NA	NA	NA	138370000	102420000	187030000	144050000	168630000	184010000	170840000	144430000	165950000	114070000	131290000	131140000	125830000	135570000	134950000	NA	NA	NA
AT5G01300	AT5G01300.1;AT5G01300.2	AT5G01300.1 | Symbols: | PEBP (phosphatidylethanolamine-binding protein) family protein | chr5:121643-122448 REVERSE LENGTH=162;AT5G01300.2 | Symbols: | PEBP (phosphatidylethanolamine-binding protein) family protein | chr5:121643-122128 REVERSE LENGTH=12	6	6	40.7	40.7	17.823	0	147.13	146	134450000	NA	201320000	205310000	362260000	556020000	180450000	160880000	163480000	165770000	163180000	169470000	133600000	129030000	114450000	71451000	74202000	72875000	NA	NA	NA
AT5G01600	AT5G01600.1	AT5G01600.1 | Symbols: ATFER1, FER1 | ferretin 1 | chr5:228149-229594 REVERSE LENGTH=255	7	6	32.5	26.7	28.178	0	109.59	124	NA	NA	NA	NA	NA	NA	119450000	130780000	101530000	279710000	242330000	307650000	350250000	383920000	470880000	432000000	431020000	420050000	Q39101	255	16.9
AT5G01670	AT5G01670.1;AT5G01670.2	AT5G01670.1 | Symbols: | NAD(P)-linked oxidoreductase superfamily protein | chr5:252000-253856 FORWARD LENGTH=322;AT5G01670.2 | Symbols: | NAD(P)-linked oxidoreductase superfamily protein | chr5:252000-253856 FORWARD LENGTH=349	10	10	37	37	36.58	0	49.034	27	45136000	NA	457350000	26851000	NA	35399000	NA	NA	NA	NA	NA	NA	NA	NA	NA	NA	NA	NA	NA	NA	NA
AT5G01800	AT5G01800.1	AT5G01800.1 | Symbols: | saposin B domain-containing protein | chr5:307422-308646 FORWARD LENGTH=217	2	2	7.8	7.8	24.631	0.0096685	1.7385	10	NA	NA	NA	NA	NA	NA	NA	NA	NA	49172000	38544000	48933000	NA	NA	NA	37900000	39793000	39437000	NA	NA	NA
AT5G01870	AT5G01870.1	AT5G01870.1 | Symbols: | Bifunctional inhibitor/lipid-transfer protein/seed storage 2S albumin superfamily protein | chr5:337234-337678 FORWARD LENGTH=116	2	2	17.2	17.2	12.326	0	4.0338	20	NA	NA	NA	68336000	69027000	80151000	136950000	112240000	95121000	NA	NA	NA	NA	NA	NA	NA	NA	NA	Q9LZV9	116	0
AT5G02240	AT5G02240.1	AT5G02240.1 | Symbols: | NAD(P)-binding Rossmann-fold superfamily protein | chr5:451502-452984 FORWARD LENGTH=253	9	9	45.8	45.8	27.103	0	239.42	268	583290000	701210000	697570000	499310000	962670000	436730000	729400000	620890000	824510000	547990000	542610000	339330000	459210000	512510000	525730000	455680000	445780000	482560000	Q94EG6	253	0
AT5G02450	AT5G02450.1	AT5G02450.1 | Symbols: | Ribosomal protein L36e family protein | chr5:533501-534394 FORWARD LENGTH=108	3	2	28.7	19.4	12.189	0	50.449	106	NA	NA	NA	888430000	538390000	77192000	689110000	470380000	534900000	356630000	354060000	839300000	227670000	371180000	395690000	304010000	211130000	317470000	Q9LZ57	108	100
AT5G02500	AT5G02500.1;AT5G02500.2	AT5G02500.1 | Symbols: HSC70-1, HSP70-1, AT-HSC70-1, HSC70 | heat shock cognate protein 70-1 | chr5:554055-556334 REVERSE LENGTH=651;AT5G02500.2 | Symbols: HSC70-1, HSP70-1, AT-HSC70-1, HSC70 | heat shock cognate protein 70-1 | chr5:554055-556334 REVERSE L	17	5	33.8	11.4	71.357	0	323.31	267	NA	NA	132150000	574380000	688990000	1484600000	863900000	966850000	860260000	607560000	714660000	1099300000	983040000	443080000	568310000	558230000	568920000	556780000	P22953	651	26
AT5G02770	AT5G02770.1	AT5G02770.1 | Symbols: | unknown protein; Has 469 Blast hits to 336 proteins in 126 species: Archae - 0; Bacteria - 54; Metazoa - 249; Fungi - 22; Plants - 47; Viruses - 0; Other Eukaryotes - 97 (source: NCBI BLink). | chr5:628101-629168 REVERSE LENGTH=21	9	9	42.5	42.5	22.779	0	100.22	96	140090000	102090000	135130000	343480000	174220000	269590000	127080000	126310000	170030000	126100000	118630000	159220000	102550000	121940000	131710000	159980000	155720000	156750000	Q9LZ08	214	100
AT5G03420	AT5G03420.1	AT5G03420.1 | Symbols: | 5-AMP-activated protein kinase-related | chr5:845641-848705 FORWARD LENGTH=598	3	3	4.7	4.7	66.57	0	3.8059	9	NA	NA	NA	NA	NA	NA	NA	NA	NA	NA	NA	NA	NA	NA	NA	21068000	20069000	NA	F4KFB3	598	53.2
AT5G03660	AT5G03660.1;AT5G03660.2	AT5G03660.1 | Symbols: | Family of unknown function (DUF662) | chr5:938068-939811 FORWARD LENGTH=173;AT5G03660.2 | Symbols: | Family of unknown function (DUF662) | chr5:938068-939811 FORWARD LENGTH=151	4	2	16.8	11.6	20.186	0	4.9769	43	86107000	NA	NA	108980000	82476000	106200000	67409000	71212000	56463000	71119000	59480000	82494000	NA	NA	NA	58960000	62046000	64279000	NA	NA	NA
AT5G03850	AT5G03850.1;AT3G10090.1	AT5G03850.1 | Symbols: | Nucleic acid-binding, OB-fold-like protein | chr5:1028542-1028736 REVERSE LENGTH=64;AT3G10090.1 | Symbols: | Nucleic acid-binding, OB-fold-like protein | chr3:3108960-3109154 REVERSE LENGTH=64	3	2	35.9	25	7.3705	0	43.072	55	NA	NA	NA	NA	117650000	NA	134920000	165520000	191320000	237650000	225410000	306870000	95470000	205650000	223890000	79061000	159440000	143360000	Q9SR73	64	9.4
AT5G03860	AT5G03860.2;AT5G03860.1	AT5G03860.2 | Symbols: MLS | malate synthase | chr5:1032276-1034527 REVERSE LENGTH=562;AT5G03860.1 | Symbols: MLS | malate synthase | chr5:1032276-1034527 REVERSE LENGTH=562	8	8	15.8	15.8	63.886	0	16.771	29	NA	NA	NA	NA	NA	NA	NA	NA	NA	NA	NA	NA	200390000	NA	45736000	77506000	49394000	89285000	Q9LZC3	562	2.3
AT5G04000	AT5G04000.1;AT5G04000.2	AT5G04000.1 | Symbols: | unknown protein; Has 1807 Blast hits to 1807 proteins in 277 species: Archae - 0; Bacteria - 0; Metazoa - 736; Fungi - 347; Plants - 385; Viruses - 0; Other Eukaryotes - 339 (source: NCBI BLink). | chr5:1079305-1079732 REVERSE LEN	4	4	47.4	47.4	12.519	0	54.005	19	NA	NA	67283000	60972000	51335000	44751000	NA	NA	NA	NA	NA	NA	NA	NA	NA	NA	NA	NA	NA	NA	NA
AT5G04430	AT5G04430.1;AT5G04430.2	AT5G04430.1 | Symbols: BTR1, BTR1S | binding to TOMV RNA 1L (long form) | chr5:1250602-1253523 REVERSE LENGTH=313;AT5G04430.2 | Symbols: BTR1, BTR1L | binding to TOMV RNA 1L (long form) | chr5:1250602-1253523 REVERSE LENGTH=334	7	7	25.9	25.9	33.82	0	19.179	68	NA	NA	NA	NA	126860000	136820000	122310000	78969000	99029000	133790000	146410000	84857000	162740000	164240000	178840000	150150000	137380000	160310000	Q9LZ82	313	23.6
AT5G04740	AT5G04740.1	AT5G04740.1 | Symbols: | ACT domain-containing protein | chr5:1368713-1371391 REVERSE LENGTH=301	8	8	23.6	23.6	33.242	0	48.88	127	NA	NA	NA	50002000	157330000	74971000	194490000	174560000	154850000	234090000	203660000	87520000	243710000	295690000	257140000	321510000	351630000	284480000	Q9LZ23	301	3.3
AT5G06110	AT5G06110.2;AT5G06110.1	AT5G06110.2 | Symbols: | DnaJ domain ;Myb-like DNA-binding domain | chr5:1841009-1843000 REVERSE LENGTH=663;AT5G06110.1 | Symbols: | DnaJ domain ;Myb-like DNA-binding domain | chr5:1841009-1843000 REVERSE LENGTH=663	3	3	4.7	4.7	75.632	0	4.2456	20	NA	NA	NA	NA	NA	NA	60014000	79106000	70272000	NA	NA	61473000	NA	NA	NA	NA	NA	NA	NA	NA	NA
AT5G06290	AT5G06290.1	AT5G06290.1 | Symbols: 2-Cys Prx B, 2CPB | 2-cysteine peroxiredoxin B | chr5:1919380-1921211 FORWARD LENGTH=273	9	3	45.8	20.5	29.78	0	107.05	93	NA	NA	NA	NA	NA	NA	NA	NA	NA	172180000	175070000	NA	282140000	305090000	268310000	381310000	420940000	404600000	Q9C5R8	273	5.1
AT5G06760	AT5G06760.1	AT5G06760.1 | Symbols: LEA4-5 | Late Embryogenesis Abundant 4-5 | chr5:2089754-2090313 REVERSE LENGTH=158	3	3	30.4	30.4	16.179	0	71.417	108	10800000000	10400000000	8676800000	858200000	744640000	700100000	236940000	291630000	300860000	133220000	148620000	86924000	54387000	88612000	68777000	67772000	84651000	68121000	Q9FG31	158	100
AT5G07090	AT5G07090.2;AT2G17360.1;AT5G58420.1;AT5G07090.1	AT5G07090.2 | Symbols: | Ribosomal protein S4 (RPS4A) family protein | chr5:2202783-2203805 FORWARD LENGTH=244;AT2G17360.1 | Symbols: | Ribosomal protein S4 (RPS4A) family protein | chr2:7546598-7548138 FORWARD LENGTH=261;AT5G58420.1 | Symbols: | Riboso	6	6	20.1	20.1	27.707	0	12.077	25	NA	NA	NA	NA	NA	NA	33286000	40186000	NA	NA	25222000	40633000	90144000	30557000	35350000	NA	NA	49698000	P49204	262	6.9
AT5G07190	AT5G07190.2;AT5G07190.1	AT5G07190.2 | Symbols: ATS3 | seed gene 3 | chr5:2237783-2238488 FORWARD LENGTH=185;AT5G07190.1 | Symbols: ATS3 | seed gene 3 | chr5:2237610-2238488 FORWARD LENGTH=213	6	6	37.8	37.8	19.874	0	86.826	462	1301800000	1761300000	1099400000	5365700000	4180000000	5460000000	3601600000	2953100000	2680000000	2449700000	2413900000	6976400000	1033100000	1949900000	1614900000	1208900000	1257200000	1277100000	Q9LYP6	213	31
AT5G07440	AT5G07440.3;AT5G07440.2;AT5G07440.1	AT5G07440.3 | Symbols: GDH2 | glutamate dehydrogenase 2 | chr5:2356153-2357546 FORWARD LENGTH=309;AT5G07440.2 | Symbols: GDH2 | glutamate dehydrogenase 2 | chr5:2356153-2358012 FORWARD LENGTH=411;AT5G07440.1 | Symbols: GDH2 | glutamate dehydrogenase 2 | ch	6	6	23.3	23.3	33.209	0	9.6724	16	NA	NA	NA	NA	NA	NA	NA	NA	NA	NA	NA	NA	52977000	NA	NA	48272000	NA	39764000	Q38946	411	0
AT5G07460	AT5G07460.1	AT5G07460.1 | Symbols: PMSR2, ATMSRA2 | peptidemethionine sulfoxide reductase 2 | chr5:2360844-2361885 REVERSE LENGTH=218	7	6	29.8	24.3	24.434	0	14.312	63	NA	NA	NA	110050000	150700000	128200000	152790000	181920000	164850000	160530000	155500000	77671000	88175000	110660000	131940000	121230000	119640000	116480000	Q9LY15	218	26.1
AT5G08100	AT5G08100.1;AT5G08100.2	AT5G08100.1 | Symbols: | N-terminal nucleophile aminohydrolases (Ntn hydrolases) superfamily protein | chr5:2593242-2594586 REVERSE LENGTH=315;AT5G08100.2 | Symbols: | N-terminal nucleophile aminohydrolases (Ntn hydrolases) superfamily protein | chr5:259	7	7	30.8	30.8	33.027	0	108.87	27	NA	NA	NA	26820000	41628000	24379000	38243000	NA	43851000	NA	NA	NA	32123000	NA	29571000	NA	NA	NA	P50287	315	0
AT5G08280	AT5G08280.1	AT5G08280.1 | Symbols: HEMC | hydroxymethylbilane synthase | chr5:2663763-2665596 REVERSE LENGTH=382	9	9	24.6	24.6	41.043	0	26.017	88	NA	NA	NA	NA	NA	NA	41315000	NA	NA	82854000	60472000	99173000	350260000	147310000	145070000	390710000	261980000	473330000	Q43316	382	8.4
AT5G08690	AT5G08690.1;AT5G08670.1;AT5G08680.1	AT5G08690.1 | Symbols: | ATP synthase alpha/beta family protein | chr5:2825739-2828352 FORWARD LENGTH=556;AT5G08670.1 | Symbols: | ATP synthase alpha/beta family protein | chr5:2818395-2821149 REVERSE LENGTH=556;AT5G08680.1 | Symbols: | ATP synthase alp	4	3	10.4	8.5	59.712	0	7.7915	16	NA	NA	NA	NA	NA	NA	42298000	29512000	NA	39634000	34243000	23607000	NA	NA	NA	NA	NA	NA	P83484	556	15.6
AT5G09390	AT5G09390.2;AT5G09390.1	AT5G09390.2 | Symbols: | CD2-binding protein-related | chr5:2913591-2915803 FORWARD LENGTH=349;AT5G09390.1 | Symbols: | CD2-binding protein-related | chr5:2913591-2915803 FORWARD LENGTH=351	3	3	11.2	11.2	39.98	0	27.496	36	NA	NA	NA	58137000	64901000	25705000	47866000	49557000	52229000	47355000	NA	33394000	NA	41302000	56099000	NA	NA	NA	NA	NA	NA
AT5G09590	AT5G09590.1	AT5G09590.1 | Symbols: MTHSC70-2, HSC70-5 | mitochondrial HSO70 2 | chr5:2975721-2978508 FORWARD LENGTH=682	14	12	21.7	18.9	72.99	0	175.46	127	NA	NA	NA	236060000	180730000	1158100000	194830000	212240000	224680000	123170000	119600000	437720000	122960000	70818000	95771000	124610000	103640000	62329000	Q9LDZ0	682	33.7
AT5G09620	AT5G09620.1	AT5G09620.1 | Symbols: | Octicosapeptide/Phox/Bem1p family protein | chr5:2983757-2985352 REVERSE LENGTH=531	6	4	18.1	12.1	59.66	0	34.718	62	NA	NA	NA	71718000	64119000	71919000	78937000	67100000	105030000	86086000	105070000	82798000	81742000	92575000	79195000	75751000	80071000	76468000	NA	NA	NA
AT5G09650	AT5G09650.1	AT5G09650.1 | Symbols: AtPPa6, PPa6 | pyrophosphorylase 6 | chr5:2991331-2993117 REVERSE LENGTH=300	6	6	22.3	22.3	33.38	0	74.172	30	NA	NA	NA	NA	NA	NA	NA	NA	NA	61162000	89392000	NA	76364000	74109000	70522000	85631000	96380000	79345000	Q9LXC9	300	3.3
AT5G09810	AT5G09810.1;AT5G59370.2;AT5G59370.1;AT3G46520.1;AT3G12110.1;AT3G53750.1;AT2G37620.2;AT2G37620.1	AT5G09810.1 | Symbols: ACT7 | actin 7 | chr5:3052809-3054220 FORWARD LENGTH=377;AT5G59370.2 | Symbols: ACT4 | actin 4 | chr5:23950109-23951586 FORWARD LENGTH=377;AT5G59370.1 | Symbols: ACT4 | actin 4 | chr5:23950109-23951586 FORWARD LENGTH=377;AT3G46520.1	6	3	21.8	11.9	41.735	0	56.672	160	NA	NA	215420000	361650000	126060000	2012300000	206540000	265810000	195570000	299680000	352670000	1466400000	444840000	316020000	336480000	271060000	279050000	281830000	P53492	377	1.1
AT5G09830	AT5G09830.1	AT5G09830.1 | Symbols: | BolA-like family protein | chr5:3057816-3058769 REVERSE LENGTH=93	2	2	19.4	19.4	10.375	0.00075358	2.3533	26	NA	NA	NA	NA	NA	NA	NA	NA	NA	61096000	69263000	55716000	NA	NA	NA	NA	NA	NA	Q9FIC3	93	63.4
AT5G10860	AT5G10860.1	AT5G10860.1 | Symbols: | Cystathionine beta-synthase (CBS) family protein | chr5:3429173-3430142 REVERSE LENGTH=206	2	2	14.1	14.1	22.729	0	7.6761	18	NA	NA	NA	NA	60094000	69492000	57421000	52488000	NA	NA	NA	NA	NA	NA	NA	NA	NA	NA	Q9LEV3	206	0
AT5G11710	AT5G11710.1	AT5G11710.1 | Symbols: | ENTH/VHS family protein | chr5:3772981-3776316 FORWARD LENGTH=560	7	7	15.7	15.7	60.634	0	151.96	37	NA	NA	NA	NA	NA	NA	55278000	48297000	56994000	88257000	74063000	86594000	74474000	NA	71667000	62379000	82281000	94933000	Q8VY07	560	62.5
AT5G12030	AT5G12030.1	AT5G12030.1 | Symbols: AT-HSP17.6A, HSP17.6, HSP17.6A | heat shock protein 17.6A | chr5:3884214-3884684 REVERSE LENGTH=156	6	6	47.4	47.4	17.685	0	64.253	165	2062500000	1870200000	1946300000	1542300000	1937100000	3386300000	784040000	909710000	944050000	332040000	423410000	360390000	113200000	NA	NA	NA	NA	NA	O81822	156	43.6
AT5G12110	AT5G12110.1	AT5G12110.1 | Symbols: | Glutathione S-transferase, C-terminal-like;Translation elongation factor EF1B/ribosomal protein S6 | chr5:3914483-3915732 FORWARD LENGTH=228	6	3	27.2	16.7	24.788	0	22.65	30	NA	NA	NA	NA	NA	NA	NA	NA	NA	NA	NA	NA	45932000	NA	NA	59407000	40469000	49964000	Q84WM9	228	66.2
AT5G12140	AT5G12140.1	AT5G12140.1 | Symbols: ATCYS1, CYS1 | cystatin-1 | chr5:3923295-3923936 REVERSE LENGTH=101	5	4	45.5	37.6	11.255	0	323.31	233	368090000	242370000	324290000	227140000	323240000	83957000	511170000	582840000	509750000	574510000	648270000	279720000	595060000	908630000	788030000	826080000	701480000	870270000	Q945Q1	101	17.8
AT5G12240	AT5G12240.2;AT5G12240.1	AT5G12240.2 | Symbols: | unknown protein; FUNCTIONS IN: molecular_function unknown; INVOLVED IN: biological_process unknown; LOCATED IN: cellular_component unknown; EXPRESSED IN: 19 plant structures; EXPRESSED DURING: 10 growth stages. | chr5:3959120-3960	4	4	35.1	35.1	13.257	0	19.633	49	NA	NA	NA	NA	NA	NA	35629000	44642000	35212000	47724000	63451000	NA	NA	NA	NA	NA	NA	NA	NA	NA	NA
AT5G13850	AT5G13850.1	AT5G13850.1 | Symbols: NACA3 | nascent polypeptide-associated complex subunit alpha-like protein 3 | chr5:4471361-4472676 FORWARD LENGTH=204	6	2	45.6	27	22.057	0	306.1	208	254550000	NA	186420000	418320000	551810000	379090000	330720000	349930000	471210000	255960000	245120000	439820000	256780000	282250000	326160000	NA	70472000	106900000	Q6ICZ8	204	75
AT5G13980	AT5G13980.2;AT5G13980.1;AT5G13980.3	AT5G13980.2 | Symbols: | Glycosyl hydrolase family 38 protein | chr5:4508626-4514334 FORWARD LENGTH=1024;AT5G13980.1 | Symbols: | Glycosyl hydrolase family 38 protein | chr5:4508626-4514334 FORWARD LENGTH=1024;AT5G13980.3 | Symbols: | Glycosyl hydrolase	9	9	9	9	115.9	0	19.768	36	NA	NA	NA	NA	101440000	NA	120980000	106200000	99730000	105140000	110970000	NA	84411000	87221000	111610000	75715000	90331000	101330000	NA	NA	NA
AT5G14540	AT5G14540.1	AT5G14540.1 | Symbols: | Protein of unknown function (DUF1421) | chr5:4687333-4689624 REVERSE LENGTH=547	7	7	13.9	13.9	59.097	0	61.007	51	NA	NA	NA	61372000	71920000	NA	104810000	88921000	80819000	113960000	125030000	60959000	114630000	128950000	108930000	136350000	159210000	114580000	NA	NA	NA
AT5G14910	AT5G14910.1	AT5G14910.1 | Symbols: | Heavy metal transport/detoxification superfamily protein | chr5:4823815-4825196 FORWARD LENGTH=178	4	4	36.5	36.5	18.956	0	99.792	225	NA	NA	NA	176170000	148550000	NA	256910000	233650000	235930000	591850000	638860000	373730000	912460000	1030000000	701940000	1250000000	1373700000	1234500000	NA	NA	NA
AT5G15200	AT5G15200.2;AT5G15200.1;AT5G39850.1	AT5G15200.2 | Symbols: | Ribosomal protein S4 | chr5:4935602-4936334 REVERSE LENGTH=156;AT5G15200.1 | Symbols: | Ribosomal protein S4 | chr5:4935124-4936334 REVERSE LENGTH=198;AT5G39850.1 | Symbols: | Ribosomal protein S4 | chr5:15950053-15951171 FORWAR	3	3	17.3	17.3	18.817	0	10.844	15	NA	NA	NA	NA	NA	NA	NA	NA	NA	NA	NA	NA	96915000	NA	NA	NA	25252000	46026000	Q9LXG1	198	27.3
AT5G15350	AT5G15350.1	AT5G15350.1 | Symbols: ENODL17, AtENODL17 | early nodulin-like protein 17 | chr5:4985184-4986154 REVERSE LENGTH=172	2	2	11.6	11.6	19.435	0	3.208	15	NA	NA	NA	NA	NA	NA	NA	NA	NA	NA	36015000	31529000	NA	NA	NA	NA	NA	41469000	Q39131	172	10.5
AT5G15970	AT5G15970.1	AT5G15970.1 | Symbols: KIN2, COR6.6 | stress-responsive protein (KIN2) / stress-induced protein (KIN2) / cold-responsive protein (COR6.6) / cold-regulated protein (COR6.6) | chr5:5211966-5212441 FORWARD LENGTH=66	4	4	63.6	63.6	6.5512	0	41.852	42	NA	NA	NA	NA	NA	NA	99170000	134490000	88171000	149550000	157980000	137140000	110560000	144000000	108830000	167360000	116920000	156960000	P31169	66	100
AT5G16390	AT5G16390.2;AT5G16390.1	AT5G16390.2 | Symbols: CAC1, CAC1A, BCCP, BCCP1, CAC1-A, BCCP-1 | chloroplastic acetylcoenzyme A carboxylase 1 | chr5:5361554-5363020 REVERSE LENGTH=254;AT5G16390.1 | Symbols: CAC1, CAC1A, BCCP, BCCP1 | chloroplastic acetylcoenzyme A carboxylase 1 | chr5:5	7	7	30.3	30.3	26.927	0	13.75	75	NA	NA	NA	NA	NA	NA	63559000	97017000	65012000	NA	97874000	107950000	95660000	97634000	83828000	171530000	127860000	143380000	Q42533	280	92.1
AT5G16400	AT5G16400.1	AT5G16400.1 | Symbols: TRXF2, ATF2 | thioredoxin F2 | chr5:5363905-5365249 REVERSE LENGTH=185	3	2	17.3	13	19.999	0	17.35	43	NA	NA	NA	NA	NA	NA	NA	NA	NA	NA	NA	NA	61785000	47125000	72965000	98018000	81180000	99264000	Q9XFH9	185	31.9
AT5G16620	AT5G16620.1	AT5G16620.1 | Symbols: PDE120, TIC40, ATTIC40 | hydroxyproline-rich glycoprotein family protein | chr5:5450808-5454256 FORWARD LENGTH=447	9	9	29.1	29.1	48.903	0	73.261	157	NA	NA	NA	425660000	300290000	515160000	336410000	318890000	328710000	228540000	165820000	901830000	189040000	206750000	268470000	212480000	187030000	220470000	Q9FMD5	447	100
AT5G16710	AT5G16710.1	AT5G16710.1 | Symbols: DHAR3 | dehydroascorbate reductase 1 | chr5:5483312-5484926 FORWARD LENGTH=258	9	9	40.3	40.3	28.514	0	86.936	101	NA	NA	NA	NA	147920000	NA	97848000	135330000	NA	145390000	177130000	103520000	211710000	201440000	195860000	288270000	294920000	248450000	Q8LE52	258	17.4
AT5G16730	AT5G16730.1	AT5G16730.1 | Symbols: | Plant protein of unknown function (DUF827) | chr5:5497890-5500775 FORWARD LENGTH=853	20	20	26.7	26.7	96.207	0	103.4	178	NA	NA	NA	NA	NA	NA	193000000	216190000	216460000	292910000	279410000	404760000	294210000	336340000	421530000	392260000	421110000	369660000	Q9LFE4	853	100
AT5G16840	AT5G16840.3;AT5G16840.1;AT5G16840.2	AT5G16840.3 | Symbols: BPA1 | binding partner of acd11 1 | chr5:5536042-5538026 FORWARD LENGTH=257;AT5G16840.1 | Symbols: BPA1 | binding partner of acd11 1 | chr5:5536042-5538026 FORWARD LENGTH=259;AT5G16840.2 | Symbols: BPA1 | binding partner of acd11 1 |	7	7	31.5	31.5	27.019	0	323.31	208	602160000	207520000	774750000	1289200000	1019600000	843750000	911370000	1157600000	1060100000	863040000	832940000	1058100000	601530000	636210000	587050000	615130000	607850000	630890000	Q9LFD5	259	23.2
AT5G16880	AT5G16880.2;AT5G16880.1;AT5G16880.3	AT5G16880.2 | Symbols: | Target of Myb protein 1 | chr5:5549658-5551274 FORWARD LENGTH=407;AT5G16880.1 | Symbols: | Target of Myb protein 1 | chr5:5549658-5551274 FORWARD LENGTH=407;AT5G16880.3 | Symbols: | Target of Myb protein 1 | chr5:5549658-5551021	9	9	31.2	31.2	45.31	0	129.6	112	NA	NA	NA	82067000	144330000	95762000	127620000	121600000	123940000	154130000	153800000	NA	134610000	149860000	157720000	172390000	187040000	166080000	Q9LFL3	407	33.4
AT5G17070	AT5G17070.1	AT5G17070.1 | Symbols: | CONTAINS InterPro DOMAIN/s: Protein phosphatase 4 core regulatory subunit R2 (InterPro:IPR015267); Has 30201 Blast hits to 17322 proteins in 780 species: Archae - 12; Bacteria - 1396; Metazoa - 17338; Fungi - 3422; Plants - 5037;	7	7	24.9	24.9	30.297	0	21.24	67	NA	NA	NA	NA	93047000	NA	77436000	85050000	67787000	93583000	73426000	NA	77573000	74575000	92529000	84323000	79812000	72207000	NA	NA	NA
AT5G17550	AT5G17550.1	AT5G17550.1 | Symbols: PEX19-2, AtPEX19-2 | peroxin 19-2 | chr5:5786743-5788166 REVERSE LENGTH=245	3	3	15.5	15.5	27.841	0	15.305	19	NA	NA	NA	30974000	35242000	49458000	27098000	30274000	32436000	NA	NA	NA	NA	NA	NA	NA	NA	NA	Q94EI3	245	95.5
AT5G17710	AT5G17710.1;AT5G17710.2	AT5G17710.1 | Symbols: EMB1241 | Co-chaperone GrpE family protein | chr5:5839560-5841639 REVERSE LENGTH=324;AT5G17710.2 | Symbols: EMB1241 | Co-chaperone GrpE family protein | chr5:5839560-5841639 REVERSE LENGTH=326	13	13	47.2	47.2	35.493	0	165.96	395	72530000	91755000	116530000	577800000	602430000	504680000	625070000	653710000	645790000	1057300000	1013300000	589920000	1163700000	1176400000	1449600000	1632900000	1804700000	1584300000	NA	NA	NA
AT5G17920	AT5G17920.2;AT5G17920.1;AT3G03780.3;AT3G03780.2;AT3G03780.1	AT5G17920.2 | Symbols: ATCIMS | Cobalamin-independent synthase family protein | chr5:5935771-5939195 FORWARD LENGTH=765;AT5G17920.1 | Symbols: ATCIMS, ATMETS, ATMS1 | Cobalamin-independent synthase family protein | chr5:5935771-5939195 FORWARD LENGTH=765;A	22	22	32.3	32.3	84.356	0	229.01	382	50123000	NA	267270000	74980000	84012000	204240000	425090000	443530000	493700000	253690000	357840000	409870000	1479500000	322990000	360230000	520400000	318940000	644960000	O50008	765	0
AT5G18100	AT5G18100.1;AT5G18100.2	AT5G18100.1 | Symbols: CSD3 | copper/zinc superoxide dismutase 3 | chr5:5987221-5988706 FORWARD LENGTH=164;AT5G18100.2 | Symbols: CSD3 | copper/zinc superoxide dismutase 3 | chr5:5987221-5988436 FORWARD LENGTH=137	4	3	35.4	27.4	16.941	0	11.959	40	NA	80148000	81501000	55108000	49844000	NA	NA	NA	NA	59125000	69783000	26413000	59710000	79894000	77571000	75769000	76325000	71134000	Q9FK60	164	6.1
AT5G19230	AT5G19230.1	AT5G19230.1 | Symbols: | Glycoprotein membrane precursor GPI-anchored | chr5:6467636-6468337 FORWARD LENGTH=189	2	2	15.3	15.3	20.51	0	6.3167	6	NA	NA	NA	NA	NA	NA	NA	NA	NA	NA	NA	NA	NA	NA	NA	NA	36621000	30975000	Q8GUL8	189	0
AT5G19370	AT5G19370.1	AT5G19370.1 | Symbols: | rhodanese-like domain-containing protein / PPIC-type PPIASE domain-containing protein | chr5:6524247-6526629 REVERSE LENGTH=299	5	5	18.7	18.7	32.98	0	8.635	12	NA	NA	NA	NA	NA	NA	NA	NA	NA	NA	NA	NA	NA	NA	NA	NA	61639000	55435000	Q93WI0	299	2.3
AT5G19510	AT5G19510.1	AT5G19510.1 | Symbols: | Translation elongation factor EF1B/ribosomal protein S6 family protein | chr5:6581854-6583137 REVERSE LENGTH=224	7	4	33.9	23.2	24.201	0	33.824	313	367310000	239430000	248040000	1660600000	974630000	1508700000	717540000	790250000	744080000	583250000	893040000	1824200000	541630000	570980000	668190000	608340000	626980000	612420000	Q9SCX3	224	47.8
AT5G19860	AT5G19860.1	AT5G19860.1 | Symbols: | Protein of unknown function, DUF538 | chr5:6714533-6715837 REVERSE LENGTH=181	2	2	17.7	17.7	20.443	0	13.126	11	NA	NA	NA	NA	NA	NA	NA	NA	NA	21789000	35355000	NA	NA	NA	NA	NA	NA	NA	NA	NA	NA
AT5G20160	AT5G20160.1;AT4G12600.1;AT5G20160.2;AT5G20160.3;AT4G22380.1;AT4G12600.2	AT5G20160.1 | Symbols: | Ribosomal protein L7Ae/L30e/S12e/Gadd45 family protein | chr5:6804075-6805102 REVERSE LENGTH=128;AT4G12600.1 | Symbols: | Ribosomal protein L7Ae/L30e/S12e/Gadd45 family protein | chr4:7453296-7454208 FORWARD LENGTH=128;AT5G20160.	2	2	26.6	26.6	13.897	0	5.5228	3	NA	NA	NA	NA	NA	NA	23279000	31995000	23695000	NA	NA	NA	NA	NA	NA	NA	NA	NA	NA	NA	NA
AT5G20290	AT5G20290.1	AT5G20290.1 | Symbols: | Ribosomal protein S8e family protein | chr5:6851695-6853012 REVERSE LENGTH=222	7	7	40.1	40.1	24.993	0	38.094	36	NA	NA	NA	84815000	NA	NA	69968000	80563000	58372000	59808000	56512000	128980000	161590000	NA	70299000	91522000	69344000	95532000	Q93VG5	222	46.8
AT5G20500	AT5G20500.1	AT5G20500.1 | Symbols: | Glutaredoxin family protein | chr5:6938652-6939665 FORWARD LENGTH=135	6	6	50.4	50.4	14.827	0	26.653	95	76681000	NA	68232000	NA	98127000	87452000	112420000	132710000	119960000	188060000	189430000	130160000	108460000	147150000	159350000	140350000	145740000	125770000	Q8LFQ6	135	5.2
AT5G20630	AT5G20630.1	AT5G20630.1 | Symbols: GLP3, GLP3A, GLP3B, ATGER3, GER3 | germin 3 | chr5:6975315-6975950 REVERSE LENGTH=211	2	2	16.1	16.1	21.836	0	24.69	61	NA	NA	NA	NA	NA	NA	124310000	138400000	NA	143450000	148360000	808430000	945040000	355520000	317440000	1475400000	855560000	1109800000	P94072	211	0
AT5G20720	AT5G20720.3;AT5G20720.2;AT5G20720.1	AT5G20720.3 | Symbols: CPN20 | chaperonin 20 | chr5:7015015-7016354 FORWARD LENGTH=253;AT5G20720.2 | Symbols: CPN20, CPN10, CHCPN10, ATCPN21, CPN21 | chaperonin 20 | chr5:7015015-7016354 FORWARD LENGTH=253;AT5G20720.1 | Symbols: CPN20, CPN10, CHCPN10, ATCP	17	17	65.2	65.2	26.802	0	323.31	1461	2058200000	2234600000	2267300000	9899500000	8336700000	9653200000	8750000000	10300000000	9628400000	12800000000	13800000000	17200000000	16700000000	16500000000	17100000000	22200000000	21000000000	20500000000	O65282	253	14.6
AT5G20920	AT5G20920.3;AT5G20920.1;AT5G20920.2	AT5G20920.3 | Symbols: EIF2 BETA | eukaryotic translation initiation factor 2 beta subunit | chr5:7094994-7096661 REVERSE LENGTH=268;AT5G20920.1 | Symbols: EIF2 BETA, EMB1401 | eukaryotic translation initiation factor 2 beta subunit | chr5:7094994-7096661	4	4	14.6	14.6	30.663	0	64.385	91	NA	NA	72041000	142400000	114210000	240370000	197920000	172490000	173740000	119160000	147230000	315980000	115770000	94913000	142750000	114760000	94247000	92769000	Q41969	268	55.6
AT5G21274	AT5G21274.1;AT3G56800.1;AT3G43810.1;AT2G41110.1;AT2G27030.1;AT2G27030.3;AT2G41110.2	AT5G21274.1 | Symbols: CAM6, ACAM-6 | calmodulin 6 | chr5:7214740-7215950 REVERSE LENGTH=149;AT3G56800.1 | Symbols: CAM3, acam-3 | calmodulin 3 | chr3:21034981-21035920 REVERSE LENGTH=149;AT3G43810.1 | Symbols: CAM7 | calmodulin 7 | chr3:15664619-15666355	14	3	51	20.1	16.833	0	323.31	270	1030000000	1100900000	1539300000	1323600000	353760000	608140000	1654800000	1278700000	990760000	620580000	1090400000	1437300000	921170000	983060000	1128100000	778540000	748780000	856390000	Q03509	149	6
AT5G21990	AT5G21990.1	AT5G21990.1 | Symbols: TPR7 | Tetratricopeptide repeat (TPR)-like superfamily protein | chr5:7273395-7276318 FORWARD LENGTH=554	6	6	14.3	14.3	60.757	0	18.74	26	NA	NA	NA	95011000	NA	156490000	NA	NA	NA	NA	NA	73604000	NA	NA	NA	NA	NA	NA	B7ZWR6	554	46.4
AT5G22470	AT5G22470.1	AT5G22470.1 | Symbols: | NAD+ ADP-ribosyltransferases;NAD+ ADP-ribosyltransferases | chr5:7447045-7450743 FORWARD LENGTH=814	17	17	29.4	29.4	91.405	0	50.317	37	NA	NA	172280000	74054000	258990000	139110000	NA	NA	NA	66847000	64565000	NA	NA	NA	NA	NA	NA	NA	Q9FK91	814	14.5
AT5G23290	AT5G23290.1	AT5G23290.1 | Symbols: PFD5 | prefoldin 5 | chr5:7846144-7847428 FORWARD LENGTH=151	4	4	40.4	40.4	16.41	0	168.16	95	85017000	89996000	93580000	154020000	137770000	111630000	97923000	100890000	95093000	112220000	110050000	93545000	110800000	124510000	108510000	99413000	113540000	101030000	P57742	151	21.2
AT5G23395	AT5G23395.1	AT5G23395.1 | Symbols: MIA40 | Cox19-like CHCH family protein | chr5:7874848-7876091 REVERSE LENGTH=162	3	3	22.2	22.2	17.367	0	15.839	42	46054000	NA	56463000	67207000	NA	59328000	59570000	53299000	56540000	51758000	43466000	86525000	54123000	45963000	42497000	NA	52274000	53245000	Q8GYJ4	162	89.5
AT5G23820	AT5G23820.1	AT5G23820.1 | Symbols: | MD-2-related lipid recognition domain-containing protein | chr5:8031386-8032809 FORWARD LENGTH=164	5	5	25.6	25.6	17.907	0	15.467	132	NA	NA	NA	NA	73624000	NA	199230000	165740000	131750000	706390000	787380000	65517000	685870000	972560000	958610000	893340000	1210000000	807160000	Q9FF98	164	0
AT5G24165	AT5G24165.1	AT5G24165.1 | Symbols: | unknown protein; FUNCTIONS IN: molecular_function unknown; INVOLVED IN: biological_process unknown; LOCATED IN: chloroplast; EXPRESSED IN: 22 plant structures; EXPRESSED DURING: 13 growth stages; BEST Arabidopsis thaliana protein	2	2	41.3	41.3	7.7558	0	8.1314	22	NA	NA	NA	NA	NA	NA	59315000	57502000	65426000	47904000	NA	63150000	NA	NA	NA	NA	NA	NA	NA	NA	NA
AT5G25070	AT5G25070.1	AT5G25070.1 | Symbols: | unknown protein; FUNCTIONS IN: molecular_function unknown; INVOLVED IN: biological_process unknown; LOCATED IN: cellular_component unknown; EXPRESSED IN: 23 plant structures; EXPRESSED DURING: 13 growth stages; Has 1807 Blast hits	3	3	6.4	6.4	82.14	0	6.715	10	NA	NA	NA	NA	NA	NA	NA	NA	NA	19200000	17587000	NA	12545000	16855000	NA	NA	15806000	NA	NA	NA	NA
AT5G25090	AT5G25090.1	AT5G25090.1 | Symbols: ENODL13, AtENODL13 | early nodulin-like protein 13 | chr5:8647117-8647755 REVERSE LENGTH=186	3	3	16.1	16.1	19.767	0	4.8766	31	83962000	73009000	56146000	65720000	NA	85184000	48730000	38722000	59576000	31882000	NA	81414000	63791000	46595000	61209000	90010000	96066000	88958000	Q8LC95	186	22.6
AT5G26000	AT5G26000.2;AT5G26000.1	AT5G26000.2 | Symbols: TGG1, BGLU38 | thioglucoside glucohydrolase 1 | chr5:9080009-9082347 REVERSE LENGTH=456;AT5G26000.1 | Symbols: TGG1, BGLU38 | thioglucoside glucohydrolase 1 | chr5:9079678-9082347 REVERSE LENGTH=541	9	9	21.3	21.3	51.481	0	55.521	83	NA	NA	NA	NA	123230000	NA	NA	NA	NA	103690000	84099000	NA	228860000	258270000	224320000	304640000	354170000	343410000	P37702	541	3.9
AT5G26667	AT5G26667.3;AT5G26667.2;AT5G26667.1	AT5G26667.3 | Symbols: PYR6 | P-loop containing nucleoside triphosphate hydrolases superfamily protein | chr5:9276659-9278091 FORWARD LENGTH=202;AT5G26667.2 | Symbols: PYR6 | P-loop containing nucleoside triphosphate hydrolases superfamily protein | chr5:9	9	9	48	48	22.481	0	33.448	119	NA	NA	NA	137320000	174620000	132850000	381140000	364900000	360580000	393220000	367500000	252330000	208030000	324780000	301390000	230700000	326210000	218450000	O04905	202	6.9
AT5G27850	AT5G27850.1;AT3G05590.1	AT5G27850.1 | Symbols: | Ribosomal protein L18e/L15 superfamily protein | chr5:9873169-9874297 FORWARD LENGTH=187;AT3G05590.1 | Symbols: RPL18 | ribosomal protein L18 | chr3:1621511-1622775 FORWARD LENGTH=187	4	4	25.1	25.1	20.967	0	11.725	17	NA	NA	NA	NA	35751000	NA	42065000	44019000	NA	NA	NA	NA	NA	NA	30318000	NA	NA	57940000	Q940B0	187	32.6
AT5G28050	AT5G28050.1;AT5G28050.2	AT5G28050.1 | Symbols: | Cytidine/deoxycytidylate deaminase family protein | chr5:10044209-10045755 REVERSE LENGTH=185;AT5G28050.2 | Symbols: | Cytidine/deoxycytidylate deaminase family protein | chr5:10044209-10045484 REVERSE LENGTH=204	4	4	32.4	32.4	20.001	0	87.332	78	NA	NA	NA	NA	NA	NA	153330000	152700000	132700000	172860000	185930000	107050000	95676000	114080000	160330000	115040000	140000000	133260000	Q94BU8	185	13
AT5G30510	AT5G30510.1	AT5G30510.1 | Symbols: RPS1, ARRPS1 | ribosomal protein S1 | chr5:11619262-11621223 REVERSE LENGTH=416	5	5	13.5	13.5	45.11	0	9.1712	13	NA	NA	NA	NA	NA	NA	NA	NA	NA	NA	NA	NA	NA	NA	NA	32958000	36818000	43660000	Q93VC7	416	19
AT5G35630	AT5G35630.3;AT5G35630.2;AT5G35630.1	AT5G35630.3 | Symbols: GS2, GLN2, ATGSL1 | glutamine synthetase 2 | chr5:13831220-13833239 FORWARD LENGTH=430;AT5G35630.2 | Symbols: GS2, GLN2, ATGSL1 | glutamine synthetase 2 | chr5:13831220-13833239 FORWARD LENGTH=430;AT5G35630.1 | Symbols: GS2, GLN2, AT	8	7	31.4	28.6	47.41	0	56.617	33	NA	NA	NA	NA	NA	NA	NA	NA	NA	NA	NA	NA	181430000	81002000	80655000	122230000	128050000	132330000	Q43127	430	10.5
AT5G35660	AT5G35660.1	AT5G35660.1 | Symbols: | Glycine-rich protein family | chr5:13852609-13853717 REVERSE LENGTH=343	4	4	22.7	22.7	31.628	0	111.65	59	844290000	394180000	1247100000	NA	307990000	NA	NA	NA	NA	NA	NA	NA	NA	NA	NA	NA	NA	NA	NA	NA	NA
AT5G37475	AT5G37475.1	AT5G37475.1 | Symbols: | Translation initiation factor eIF3 subunit | chr5:14866328-14867749 REVERSE LENGTH=225	6	6	40	40	25.168	0	16.705	57	NA	NA	NA	84557000	60882000	84273000	66385000	68760000	64186000	68884000	78582000	89096000	80383000	85427000	74325000	92550000	75274000	92552000	NA	NA	NA
AT5G37600	AT5G37600.1;AT5G16570.1	AT5G37600.1 | Symbols: ATGSR1, GLN1;1, GSR 1, ATGLN1;1 | glutamine synthase clone R1 | chr5:14933574-14935656 REVERSE LENGTH=356;AT5G16570.1 | Symbols: GLN1;4 | glutamine synthetase 1;4 | chr5:5421898-5424523 REVERSE LENGTH=356	2	2	8.7	8.7	39.115	0	41.957	31	NA	NA	NA	NA	NA	NA	29031000	43853000	25107000	NA	32302000	25897000	45076000	19836000	21550000	30338000	19468000	24694000	Q56WN1	356	4.5
AT5G37770	AT5G37770.1	AT5G37770.1 | Symbols: TCH2, CML24 | EF hand calcium-binding protein family | chr5:14999075-14999560 REVERSE LENGTH=161	2	2	12.4	12.4	17.546	0	7.6787	4	NA	NA	NA	NA	NA	NA	NA	NA	NA	17891000	20285000	29882000	NA	NA	NA	NA	NA	NA	P25070	161	11.8
AT5G37780	AT5G37780.1;AT1G66410.1;AT1G66410.2;AT5G37780.2;AT5G37780.3;AT2G27030.2	AT5G37780.1 | Symbols: CAM1, TCH1, ACAM-1 | calmodulin 1 | chr5:15004769-15006117 REVERSE LENGTH=149;AT1G66410.1 | Symbols: CAM4, ACAM-4 | calmodulin 4 | chr1:24774431-24775785 REVERSE LENGTH=149;AT1G66410.2 | Symbols: CAM4 | calmodulin 4 | chr1:24774431-2	14	3	51	20.1	16.862	0	323.31	1252	8205200000	8308300000	8526500000	10100000000	9990500000	9851600000	11400000000	8869500000	9779200000	8078400000	7511600000	12000000000	7155400000	9896500000	10700000000	10100000000	9811200000	9058100000	P0DH95	149	10.1
AT5G38160	AT5G38160.1	AT5G38160.1 | Symbols: | Bifunctional inhibitor/lipid-transfer protein/seed storage 2S albumin superfamily protein | chr5:15225836-15226147 FORWARD LENGTH=103	5	5	38.8	38.8	10.887	0	323.31	149	3030000000	2318100000	2970000000	879390000	663450000	1163400000	532040000	401450000	404880000	114760000	122870000	178880000	65420000	140990000	NA	NA	NA	NA	NA	NA	NA
AT5G38170	AT5G38170.1	AT5G38170.1 | Symbols: | Bifunctional inhibitor/lipid-transfer protein/seed storage 2S albumin superfamily protein | chr5:15227717-15228028 FORWARD LENGTH=103	8	8	38.8	38.8	10.936	0	92.524	158	6016500000	6530700000	5789200000	2109500000	1033600000	3503200000	1283200000	881430000	965840000	325780000	499270000	628330000	326410000	418400000	249430000	449470000	292150000	443640000	NA	NA	NA
AT5G38420	AT5G38420.1;AT5G38410.1;AT5G38410.3;AT5G38410.2	AT5G38420.1 | Symbols: | Ribulose bisphosphate carboxylase (small chain) family protein | chr5:15381203-15381978 REVERSE LENGTH=181;AT5G38410.1 | Symbols: | Ribulose bisphosphate carboxylase (small chain) family protein | chr5:15377501-15378306 REVERSE L	11	3	60.8	19.9	20.35	0	87.018	230	NA	NA	NA	NA	NA	NA	135270000	120010000	73945000	186080000	317090000	316680000	4126400000	735590000	891340000	2358700000	1390400000	2770400000	P10797	181	6.1
AT5G38430	AT5G38430.1	AT5G38430.1 | Symbols: | Ribulose bisphosphate carboxylase (small chain) family protein | chr5:15384350-15385155 REVERSE LENGTH=181	10	2	60.2	19.3	20.286	0	7.398	10	NA	NA	NA	NA	NA	NA	NA	NA	NA	NA	NA	NA	84305000	NA	NA	48175000	NA	43153000	P10796	181	3.3
AT5G38470	AT5G38470.2;AT5G38470.1	AT5G38470.2 | Symbols: RAD23D | Rad23 UV excision repair protein family | chr5:15404720-15407251 FORWARD LENGTH=332;AT5G38470.1 | Symbols: RAD23D | Rad23 UV excision repair protein family | chr5:15404720-15407500 FORWARD LENGTH=378	5	3	15.7	10.5	34.712	0	77.035	123	197690000	94117000	178850000	324490000	400060000	650550000	359730000	359530000	330780000	334160000	374610000	259640000	283230000	258540000	315260000	280260000	302740000	278630000	Q84L30	378	48.4
AT5G38480	AT5G38480.2;AT5G38480.1	AT5G38480.2 | Symbols: GRF3, RCI1 | general regulatory factor 3 | chr5:15410277-15411285 FORWARD LENGTH=254;AT5G38480.1 | Symbols: GRF3, RCI1 | general regulatory factor 3 | chr5:15410277-15411285 FORWARD LENGTH=255	10	4	48.8	28	28.491	0	101.97	58	NA	NA	NA	NA	84020000	62435000	55142000	52515000	39860000	138310000	182260000	NA	72871000	104370000	115050000	NA	82697000	NA	P42644	255	9.4
AT5G39570	AT5G39570.1	AT5G39570.1 | Symbols: | FUNCTIONS IN: molecular_function unknown; INVOLVED IN: biological_process unknown; LOCATED IN: cytosol, nucleus; EXPRESSED IN: 25 plant structures; EXPRESSED DURING: 14 growth stages; BEST Arabidopsis thaliana protein match is: gl	17	17	58.5	58.5	43.526	0	323.31	538	NA	NA	NA	758370000	1353300000	397380000	3896600000	3859300000	3720800000	3791200000	3309600000	2545900000	2739800000	2645800000	2890200000	958270000	925490000	1748200000	Q9FKA5	381	100
AT5G39720	AT5G39720.1	AT5G39720.1 | Symbols: AIG2L | avirulence induced gene 2 like protein | chr5:15899673-15900517 FORWARD LENGTH=165	3	3	18.8	18.8	19.103	0	34.503	23	NA	NA	NA	68860000	127480000	52818000	50529000	43381000	43620000	28375000	27034000	NA	NA	NA	NA	NA	NA	NA	Q9FIX2	165	19.4
AT5G39730	AT5G39730.1	AT5G39730.1 | Symbols: | AIG2-like (avirulence induced gene) family protein | chr5:15901740-15902624 FORWARD LENGTH=172	4	4	18	18	20.017	0	6.1842	15	NA	NA	NA	NA	NA	NA	NA	NA	NA	NA	NA	NA	26665000	21419000	NA	NA	25253000	20474000	Q9FIX1	172	23.3
AT5G40370	AT5G40370.1;AT5G40370.2	AT5G40370.1 | Symbols: | Glutaredoxin family protein | chr5:16147826-16149052 REVERSE LENGTH=111;AT5G40370.2 | Symbols: | Glutaredoxin family protein | chr5:16147826-16148900 REVERSE LENGTH=136	6	6	82	82	11.756	0	323.31	313	1201500000	1486300000	1170300000	1401100000	1369900000	1369600000	1194100000	1451100000	1303900000	1099100000	1100200000	858300000	701230000	907450000	804000000	752620000	734800000	717070000	Q9FNE2	111	7.2
AT5G40420	AT5G40420.1	AT5G40420.1 | Symbols: OLEO2, OLE2 | oleosin 2 | chr5:16173622-16174740 REVERSE LENGTH=199	8	8	32.2	32.2	21.279	0	40.281	71	857310000	614430000	1332900000	572580000	389940000	47639000	159640000	85947000	51200000	NA	NA	NA	NA	NA	NA	NA	NA	NA	Q39165	199	31.7
AT5G40450	AT5G40450.1	AT5G40450.1 | Symbols: | unknown protein; FUNCTIONS IN: molecular_function unknown; INVOLVED IN: biological_process unknown; LOCATED IN: chloroplast, plasma membrane; EXPRESSED IN: 24 plant structures; EXPRESSED DURING: 13 growth stages; Has 30201 Blast h	66	65	30.9	30.6	323	0	323.31	317	NA	NA	NA	NA	NA	NA	NA	NA	NA	266660000	224060000	252250000	806520000	675290000	812030000	1608700000	1438200000	1460000000	NA	NA	NA
AT5G40950	AT5G40950.1	AT5G40950.1 | Symbols: RPL27 | ribosomal protein large subunit 27 | chr5:16410866-16411845 FORWARD LENGTH=198	2	2	13.1	13.1	21.737	0	16.218	14	NA	NA	NA	NA	NA	NA	NA	NA	NA	NA	39091000	84375000	60800000	52322000	58740000	83884000	56832000	100860000	Q9FLN4	198	24.2
AT5G42020	AT5G42020.1;AT5G42020.2	AT5G42020.1 | Symbols: BIP, BIP2 | Heat shock protein 70 (Hsp 70) family protein | chr5:16807697-16810480 REVERSE LENGTH=668;AT5G42020.2 | Symbols: BIP | Heat shock protein 70 (Hsp 70) family protein | chr5:16807697-16810480 REVERSE LENGTH=613	18	2	30.4	4.3	73.56	0	286.43	195	83713000	NA	296780000	172550000	278610000	157570000	301020000	321070000	235390000	297050000	371950000	299190000	415740000	351760000	310720000	279390000	254620000	324470000	Q39043	668	25
AT5G42070	AT5G42070.1	AT5G42070.1 | Symbols: | unknown protein; FUNCTIONS IN: molecular_function unknown; INVOLVED IN: biological_process unknown; LOCATED IN: chloroplast thylakoid membrane, chloroplast; EXPRESSED IN: 21 plant structures; EXPRESSED DURING: 13 growth stages; Ha	2	2	18.9	18.9	17.681	0	6.196	14	NA	NA	NA	NA	NA	NA	NA	NA	NA	16982000	NA	34955000	NA	NA	NA	NA	30617000	20004000	NA	NA	NA
AT5G42190	AT5G42190.1	AT5G42190.1 | Symbols: ASK2, SKP1B | E3 ubiquitin ligase SCF complex subunit SKP1/ASK1 family protein | chr5:16854495-16855516 REVERSE LENGTH=171	6	3	50.9	38.6	19.097	0	60.12	10	NA	NA	NA	NA	NA	NA	25376000	25812000	37488000	NA	NA	NA	NA	NA	NA	NA	NA	NA	Q9FHW7	171	41.5
AT5G42220	AT5G42220.1	AT5G42220.1 | Symbols: | Ubiquitin-like superfamily protein | chr5:16872962-16877455 FORWARD LENGTH=879	4	4	6.4	6.4	92.553	0	101.04	29	NA	NA	NA	47243000	32465000	94150000	39609000	NA	47819000	41050000	NA	64274000	32438000	36426000	NA	NA	NA	34568000	NA	NA	NA
AT5G42765	AT5G42765.1	AT5G42765.1 | Symbols: | INVOLVED IN: biological_process unknown; LOCATED IN: thylakoid, chloroplast thylakoid membrane, chloroplast; EXPRESSED IN: 22 plant structures; EXPRESSED DURING: 13 growth stages; CONTAINS InterPro DOMAIN/s: Twin-arginine transloc	2	2	10	10	25.098	0	3.2776	10	NA	NA	NA	NA	NA	NA	NA	NA	NA	NA	99213000	82929000	NA	NA	NA	NA	NA	NA	NA	NA	NA
AT5G42850	AT5G42850.2;AT5G42850.1	AT5G42850.2 | Symbols: | Thioredoxin superfamily protein | chr5:17182072-17182568 REVERSE LENGTH=134;AT5G42850.1 | Symbols: | Thioredoxin superfamily protein | chr5:17182072-17182568 REVERSE LENGTH=134	4	4	33.6	33.6	15.206	0	60.222	62	105340000	101810000	93641000	NA	93886000	70305000	105890000	129940000	117260000	122310000	133250000	56871000	87908000	132320000	94732000	70380000	78515000	83023000	Q9FMN4	134	7.5
AT5G42890	AT5G42890.1	AT5G42890.1 | Symbols: ATSCP2, SCP2 | sterol carrier protein 2 | chr5:17194458-17195910 REVERSE LENGTH=123	9	9	52	52	13.568	0	19.099	344	606950000	651270000	651150000	962430000	573420000	1336100000	665870000	783390000	684600000	820140000	780100000	1099700000	531060000	876090000	877660000	644970000	661630000	531840000	Q9FMN0	123	17.1
AT5G42950	AT5G42950.1	AT5G42950.1 | Symbols: | GYF domain-containing protein | chr5:17224436-17231044 FORWARD LENGTH=1714	15	15	10.7	10.7	187.62	0	48.071	59	NA	NA	NA	69470000	52913000	127390000	50868000	78956000	91252000	104070000	100330000	70477000	72260000	66066000	73328000	82229000	91943000	86946000	NA	NA	NA
AT5G42980	AT5G42980.1	AT5G42980.1 | Symbols: ATTRX3, ATH3, ATTRXH3, TRXH3, TRX3 | thioredoxin 3 | chr5:17242772-17243718 FORWARD LENGTH=118	8	8	60.2	60.2	13.109	0	209.93	383	406720000	378190000	628590000	481510000	1610000000	426220000	1010200000	924610000	1051800000	1228100000	1550000000	299750000	1084400000	1202800000	1180000000	1173900000	1302300000	1209300000	Q42403	118	6.8
AT5G43060	AT5G43060.1	AT5G43060.1 | Symbols: | Granulin repeat cysteine protease family protein | chr5:17269784-17272117 REVERSE LENGTH=463	11	11	30.9	30.9	51.203	0	243.21	373	111150000	NA	76331000	299710000	525480000	425750000	1632400000	1748800000	1486400000	2534300000	2590000000	961950000	2005400000	2481500000	2713500000	2674700000	2757800000	2600500000	Q9FMH8	463	10.4
AT5G43960	AT5G43960.2;AT5G43960.1	AT5G43960.2 | Symbols: | Nuclear transport factor 2 (NTF2) family protein with RNA binding (RRM-RBD-RNP motifs) domain | chr5:17689154-17691220 REVERSE LENGTH=391;AT5G43960.1 | Symbols: | Nuclear transport factor 2 (NTF2) family protein with RNA binding	5	5	16.6	16.6	43.484	0	16.987	36	NA	NA	NA	NA	NA	NA	49846000	48287000	40731000	52820000	62299000	NA	49613000	50747000	51936000	60316000	49873000	51942000	NA	NA	NA
AT5G44120	AT5G44120.3;AT5G44120.2	AT5G44120.3 | Symbols: CRA1, ATCRA1, CRU1 | RmlC-like cupins superfamily protein | chr5:17756460-17758246 REVERSE LENGTH=472;AT5G44120.2 | Symbols: CRA1, ATCRA1, CRU1 | RmlC-like cupins superfamily protein | chr5:17756460-17757811 REVERSE LENGTH=368	29	8	71.4	26.5	52.594	0	323.31	3797	160000000000	226000000000	102000000000	132000000000	101000000000	58700000000	58900000000	58900000000	58500000000	36200000000	35600000000	47600000000	12500000000	13500000000	14000000000	7580500000	7426600000	8404600000	P15455	472	13.6
AT5G44130	AT5G44130.1	AT5G44130.1 | Symbols: FLA13 | FASCICLIN-like arabinogalactan protein 13 precursor | chr5:17761128-17761871 FORWARD LENGTH=247	5	4	21.5	17.8	26.205	0	323.31	181	NA	NA	NA	NA	NA	104160000	235100000	244760000	297730000	666660000	545340000	946240000	959820000	799490000	951990000	1356300000	1151200000	1183700000	Q9FFH6	247	19.4
AT5G44310	AT5G44310.2;AT5G44310.1	AT5G44310.2 | Symbols: | Late embryogenesis abundant protein (LEA) family protein | chr5:17847998-17849436 REVERSE LENGTH=331;AT5G44310.1 | Symbols: | Late embryogenesis abundant protein (LEA) family protein | chr5:17847998-17848885 REVERSE LENGTH=295	16	16	34.1	34.1	37.159	0	323.31	273	2247900000	1644100000	1713600000	2069100000	1735600000	2665900000	908560000	1040000000	1498300000	860210000	758760000	949140000	499090000	535170000	516400000	444460000	449740000	478310000	NA	NA	NA
AT5G44460	AT5G44460.1	AT5G44460.1 | Symbols: CML43 | calmodulin like 43 | chr5:17917286-17917831 FORWARD LENGTH=181	6	4	33.7	28.2	20.253	0	72.635	37	NA	NA	NA	86792000	139390000	44417000	54177000	NA	89419000	60540000	68529000	71454000	34699000	49993000	NA	54634000	68059000	54554000	Q9FI19	181	22.7
AT5G44610	AT5G44610.1	AT5G44610.1 | Symbols: MAP18, PCAP2 | microtubule-associated protein 18 | chr5:17993718-17994224 REVERSE LENGTH=168	12	12	54.2	54.2	18.549	0	100.24	111	NA	NA	NA	NA	NA	NA	155590000	164400000	161470000	230080000	259940000	297340000	214310000	195090000	260510000	286240000	256840000	233300000	Q9LU05	168	100
AT5G45680	AT5G45680.1	AT5G45680.1 | Symbols: ATFKBP13, FKBP13 | FK506-binding protein 13 | chr5:18530894-18532128 FORWARD LENGTH=208	3	3	12.5	12.5	22.039	0	3.7024	43	NA	NA	NA	NA	NA	NA	NA	NA	NA	80342000	66203000	101540000	69543000	83315000	85441000	116790000	93423000	83119000	Q9SCY2	208	0
AT5G45690	AT5G45690.1	AT5G45690.1 | Symbols: | Protein of unknown function (DUF1264) | chr5:18535139-18536259 REVERSE LENGTH=247	11	11	53.4	53.4	27.846	0	144.47	261	901080000	763830000	1301100000	691870000	1396400000	429430000	755540000	792860000	788340000	769660000	716530000	339660000	461140000	598680000	572670000	585690000	451480000	539900000	Q941A4	247	25.5
AT5G45930	AT5G45930.1	AT5G45930.1 | Symbols: CHLI2, CHL I2, CHLI-2 | magnesium chelatase i2 | chr5:18628095-18629565 FORWARD LENGTH=418	15	8	40.4	22.5	46.097	0	84.96	123	NA	NA	NA	NA	53478000	NA	107680000	132940000	143920000	284950000	297630000	274660000	345090000	409210000	376200000	426280000	536820000	422690000	Q5XF33	418	19.1
AT5G46020	AT5G46020.1	AT5G46020.1 | Symbols: | CONTAINS InterPro DOMAIN/s: Casein kinase substrate, phosphoprotein PP28 (InterPro:IPR019380); Has 30201 Blast hits to 17322 proteins in 780 species: Archae - 12; Bacteria - 1396; Metazoa - 17338; Fungi - 3422; Plants - 5037; Viru	4	4	20.1	20.1	18.977	0	26.346	28	NA	NA	NA	NA	NA	NA	50833000	58318000	52313000	87169000	60897000	73780000	NA	NA	NA	NA	NA	NA	NA	NA	NA
AT5G46290	AT5G46290.2;AT5G46290.1;AT5G46290.3	AT5G46290.2 | Symbols: KASI, KAS1 | 3-ketoacyl-acyl carrier protein synthase I | chr5:18774439-18776629 REVERSE LENGTH=418;AT5G46290.1 | Symbols: KASI, KAS1 | 3-ketoacyl-acyl carrier protein synthase I | chr5:18774439-18776629 REVERSE LENGTH=473;AT5G46290.	5	5	18.2	18.2	44.729	0	25.181	15	73332000	NA	86293000	NA	NA	NA	NA	NA	NA	NA	NA	NA	NA	NA	NA	NA	NA	NA	P52410	473	12.5
AT5G46750	AT5G46750.1	AT5G46750.1 | Symbols: AGD9 | ARF-GAP domain 9 | chr5:18969950-18971817 REVERSE LENGTH=402	5	5	20.4	20.4	43.55	0	139.69	69	NA	NA	NA	NA	54016000	79294000	102320000	111750000	122950000	118460000	111560000	139900000	89905000	86087000	68836000	109080000	96763000	102020000	Q9FIQ0	402	48.8
AT5G46960	AT5G46960.1	AT5G46960.1 | Symbols: | Plant invertase/pectin methylesterase inhibitor superfamily protein | chr5:19062220-19062744 REVERSE LENGTH=174	8	6	64.9	55.2	19.07	0	241.73	245	NA	NA	NA	290000000	373880000	370640000	1217800000	1010000000	1178600000	588620000	605980000	691210000	511010000	572490000	549100000	631200000	610400000	569390000	Q9FJR5	174	0
AT5G47030	AT5G47030.1	AT5G47030.1 | Symbols: | ATPase, F1 complex, delta/epsilon subunit | chr5:19090384-19092034 FORWARD LENGTH=203	3	3	16.7	16.7	21.547	0	6.9015	39	NA	NA	NA	NA	146320000	NA	226690000	239810000	216010000	345580000	288800000	227890000	232340000	233270000	170310000	200020000	201210000	149120000	Q96252	203	14.3
AT5G47210	AT5G47210.1;AT5G47210.3;AT5G47210.2	AT5G47210.1 | Symbols: | Hyaluronan / mRNA binding family | chr5:19169222-19171012 REVERSE LENGTH=357;AT5G47210.3 | Symbols: | Hyaluronan / mRNA binding family | chr5:19169388-19171012 REVERSE LENGTH=301;AT5G47210.2 | Symbols: | Hyaluronan / mRNA bindin	19	18	56	52.1	37.999	0	317.89	895	1622500000	1871300000	1421700000	1836800000	1664500000	1320300000	2741100000	3105500000	2481100000	2997800000	3384800000	2975400000	2938300000	2708800000	2766800000	2769100000	2672500000	2968900000	Q9LVT8	357	100
AT5G47480	AT5G47480.1	AT5G47480.1 | Symbols: | RGPR-related | chr5:19257420-19263132 FORWARD LENGTH=1350	4	4	6.4	6.4	145.88	0	14.931	5	NA	NA	NA	NA	NA	NA	NA	NA	NA	NA	20106000	36444000	NA	NA	NA	NA	NA	NA	NA	NA	NA
AT5G47550	AT5G47550.1	AT5G47550.1 | Symbols: | Cystatin/monellin superfamily protein | chr5:19286596-19286964 REVERSE LENGTH=122	4	4	57.4	57.4	13.372	0	105.15	281	347940000	313410000	251310000	236310000	233580000	329100000	288610000	210140000	226510000	155100000	156780000	232020000	158540000	213400000	133740000	173380000	185550000	146520000	Q41916	122	0
AT5G47840	AT5G47840.1	AT5G47840.1 | Symbols: AMK2 | adenosine monophosphate kinase | chr5:19375488-19378058 FORWARD LENGTH=283	5	4	21.2	18.4	31.451	0	7.8694	11	NA	NA	NA	NA	NA	NA	NA	NA	NA	NA	NA	NA	NA	NA	NA	34714000	44445000	34302000	Q9FIJ7	283	12.7
AT5G48480	AT5G48480.1	AT5G48480.1 | Symbols: | Lactoylglutathione lyase / glyoxalase I family protein | chr5:19644814-19645658 FORWARD LENGTH=166	10	10	89.8	89.8	17.557	0	62.382	98	NA	NA	NA	NA	216000000	43607000	150150000	171050000	169990000	235890000	252580000	41705000	215980000	248370000	206260000	270060000	305150000	288580000	Q9LV66	166	15.1
AT5G48485	AT5G48485.1	AT5G48485.1 | Symbols: DIR1 | Bifunctional inhibitor/lipid-transfer protein/seed storage 2S albumin superfamily protein | chr5:19646317-19646625 REVERSE LENGTH=102	3	3	54.9	54.9	10.702	0	24.349	73	NA	NA	NA	NA	NA	NA	109000000	NA	NA	236120000	266360000	363130000	492350000	460650000	263620000	973630000	630920000	758230000	Q8W453	102	6.9
AT5G48490	AT5G48490.1	AT5G48490.1 | Symbols: | Bifunctional inhibitor/lipid-transfer protein/seed storage 2S albumin superfamily protein | chr5:19647932-19648237 REVERSE LENGTH=101	4	4	48.5	48.5	10.754	0	39.347	36	NA	NA	NA	NA	NA	NA	NA	NA	NA	119600000	143540000	158190000	103320000	123040000	NA	441590000	393490000	386150000	NA	NA	NA
AT5G48580	AT5G48580.1	AT5G48580.1 | Symbols: FKBP15-2 | FK506- and rapamycin-binding protein 15 kD-2 | chr5:19696156-19697304 REVERSE LENGTH=163	6	5	33.7	33.7	17.658	0	41.367	131	NA	NA	NA	238230000	194240000	286530000	347570000	391210000	354040000	316040000	335690000	546980000	297970000	320010000	274330000	281250000	294820000	254760000	Q38936	163	14.7
AT5G49910	AT5G49910.1	AT5G49910.1 | Symbols: CPHSC70-2EAT SHOCK PROTEIN 70-2, HSC70-7, cpHsc70-2 | chloroplast heat shock protein 70-2 | chr5:20303470-20306295 FORWARD LENGTH=718	34	8	38.6	7.8	76.996	0	87.711	99	NA	NA	NA	NA	143690000	190220000	121040000	187870000	136890000	351610000	403600000	NA	462070000	525650000	435200000	455680000	614350000	520190000	Q9LTX9	718	35.4
AT5G50250	AT5G50250.1	AT5G50250.1 | Symbols: CP31B | chloroplast RNA-binding protein 31B | chr5:20452677-20453965 REVERSE LENGTH=289	5	5	14.5	14.5	31.869	0	47.521	140	NA	NA	NA	204370000	203710000	147880000	188630000	211730000	186440000	233110000	284810000	174680000	346930000	347400000	293680000	424070000	417750000	360290000	Q9FGS0	289	38.1
AT5G50370	AT5G50370.1	AT5G50370.1 | Symbols: | Adenylate kinase family protein | chr5:20509382-20510631 REVERSE LENGTH=248	10	8	33.1	26.2	27.335	0	71.835	79	112880000	137140000	172800000	119780000	83786000	114370000	65153000	91072000	82554000	69003000	77543000	104740000	56767000	76465000	93693000	69169000	59638000	74884000	Q9FK35	248	17.3
AT5G50700	AT5G50700.1;AT5G50600.1	AT5G50700.1 | Symbols: HSD1 | hydroxysteroid dehydrogenase 1 | chr5:20623259-20624995 REVERSE LENGTH=349;AT5G50600.1 | Symbols: ATHSD1, HSD1 | hydroxysteroid dehydrogenase 1 | chr5:20589917-20591653 REVERSE LENGTH=349	14	14	43.6	43.6	39.086	0	124.49	59	457380000	NA	1230700000	256940000	131570000	51670000	NA	NA	NA	NA	NA	NA	NA	NA	NA	NA	NA	NA	P0DKC6	349	10.9
AT5G50920	AT5G50920.1	AT5G50920.1 | Symbols: CLPC, ATHSP93-V, HSP93-V, DCA1, CLPC1 | CLPC homologue 1 | chr5:20715710-20719800 REVERSE LENGTH=929	20	6	24.1	6.1	103.45	0	70.625	133	NA	NA	NA	91583000	92451000	346940000	131980000	137440000	92432000	142800000	154240000	430050000	288590000	167160000	187530000	264350000	254250000	249180000	Q9FI56	929	21.2
AT5G51040	AT5G51040.2;AT5G51040.1;AT5G51040.3	AT5G51040.2 | Symbols: | unknown protein; CONTAINS InterPro DOMAIN/s: Protein of unknown function DUF339 (InterPro:IPR005631); Has 368 Blast hits to 368 proteins in 141 species: Archae - 0; Bacteria - 216; Metazoa - 8; Fungi - 13; Plants - 40; Viruses - 0	4	4	30.4	30.4	20.73	0	18.427	57	NA	NA	NA	135060000	94817000	108190000	113770000	96515000	138600000	91854000	88012000	111950000	59189000	77967000	NA	NA	NA	NA	Q9FI44	188	32.4
AT5G51110	AT5G51110.2;AT5G51110.1	AT5G51110.2 | Symbols: | Transcriptional coactivator/pterin dehydratase | chr5:20778316-20779380 REVERSE LENGTH=193;AT5G51110.1 | Symbols: | Transcriptional coactivator/pterin dehydratase | chr5:20778316-20779380 REVERSE LENGTH=220	4	4	37.3	37.3	20.908	0	12.886	19	NA	NA	NA	NA	NA	NA	NA	NA	NA	NA	NA	NA	46345000	53275000	NA	44932000	NA	32072000	Q9LU63	220	5
AT5G51700	AT5G51700.1	AT5G51700.1 | Symbols: PBS2, ATRAR1, RPR2, RAR1 | protein binding;zinc ion binding | chr5:21001373-21003143 REVERSE LENGTH=226	3	3	15.5	15.5	24.961	0	16.592	40	NA	NA	NA	NA	NA	NA	66376000	53950000	82172000	80294000	52095000	NA	56357000	NA	55500000	72023000	49472000	60647000	Q9SE33	226	100
AT5G51720	AT5G51720.1	AT5G51720.1 | Symbols: | 2 iron, 2 sulfur cluster binding | chr5:21009645-21010227 FORWARD LENGTH=108	3	3	34.3	34.3	11.626	0	11.018	24	NA	NA	NA	NA	NA	NA	NA	NA	NA	NA	NA	NA	129940000	116450000	NA	171750000	165770000	127550000	Q9FLI7	108	5.6
AT5G52200	AT5G52200.1;AT5G52200.2	AT5G52200.1 | Symbols: | phosphoprotein phosphatase inhibitors | chr5:21202818-21204719 REVERSE LENGTH=191;AT5G52200.2 | Symbols: | phosphoprotein phosphatase inhibitors | chr5:21202818-21204017 REVERSE LENGTH=211	4	4	28.8	28.8	21.097	0	127.11	79	NA	NA	NA	193930000	153690000	178500000	156860000	158220000	200980000	137850000	132950000	221140000	157770000	136110000	127790000	60833000	80698000	100420000	Q9LTK0	191	100
AT5G52300	AT5G52300.2;AT5G52300.1	AT5G52300.2 | Symbols: RD29B, LTI65 | CAP160 protein | chr5:21237205-21239404 FORWARD LENGTH=618;AT5G52300.1 | Symbols: RD29B, LTI65 | CAP160 protein | chr5:21237205-21239404 FORWARD LENGTH=619	30	30	55.3	55.3	65.841	0	323.31	693	10600000000	9204400000	11800000000	5343800000	4387300000	5671900000	1129200000	1072200000	1561600000	463520000	511750000	769920000	151310000	194310000	199820000	136560000	147040000	116240000	Q04980	619	100
AT5G52310	AT5G52310.1	AT5G52310.1 | Symbols: COR78, LTI78, RD29A, LTI140 | low-temperature-responsive protein 78 (LTI78) / desiccation-responsive protein 29A (RD29A) | chr5:21240929-21243326 FORWARD LENGTH=710	6	6	10.4	10.4	77.855	0	41.331	12	NA	NA	NA	23083000	32100000	46162000	NA	NA	NA	NA	NA	NA	NA	NA	30176000	NA	NA	NA	Q06738	710	100
AT5G52650	AT5G52650.1;AT4G25740.1	AT5G52650.1 | Symbols: | RNA binding Plectin/S10 domain-containing protein | chr5:21355781-21357003 REVERSE LENGTH=179;AT4G25740.1 | Symbols: | RNA binding Plectin/S10 domain-containing protein | chr4:13107488-13108751 REVERSE LENGTH=177	3	3	22.3	22.3	19.551	0	4.7319	21	NA	NA	NA	NA	NA	NA	NA	56032000	37375000	NA	22146000	117960000	71391000	NA	NA	28908000	25578000	37344000	Q9LTF2	179	53.1
AT5G52840	AT5G52840.1	AT5G52840.1 | Symbols: | NADH-ubiquinone oxidoreductase-related | chr5:21413718-21414794 FORWARD LENGTH=169	7	7	40.8	40.8	19.179	0	150.08	38	NA	NA	NA	NA	70689000	NA	73521000	62849000	52225000	89737000	87361000	NA	45819000	47918000	60529000	43581000	42100000	41654000	Q9FLX7	169	34.3
AT5G53140	AT5G53140.1	AT5G53140.1 | Symbols: | Protein phosphatase 2C family protein | chr5:21549228-21552132 FORWARD LENGTH=420	6	6	19	19	45.786	0	50.439	37	NA	NA	NA	NA	57790000	NA	66882000	56388000	66088000	59934000	60242000	NA	61716000	63263000	66820000	65917000	62970000	59089000	Q94AT1	420	20.7
AT5G53400	AT5G53400.1	AT5G53400.1 | Symbols: BOB1 | HSP20-like chaperones superfamily protein | chr5:21661588-21663383 FORWARD LENGTH=304	11	11	41.4	41.4	34.506	0	65.365	133	NA	NA	NA	383090000	352510000	269180000	257700000	268910000	296040000	204110000	187010000	246990000	181280000	199580000	198040000	165890000	214620000	151400000	Q9LV09	304	49.3
AT5G53490	AT5G53490.2;AT5G53490.1;AT5G53490.3	AT5G53490.2 | Symbols: | Tetratricopeptide repeat (TPR)-like superfamily protein | chr5:21723488-21724621 REVERSE LENGTH=235;AT5G53490.1 | Symbols: | Tetratricopeptide repeat (TPR)-like superfamily protein | chr5:21723488-21724621 REVERSE LENGTH=236;AT5G	9	9	36.2	36.2	25.573	0	57.479	97	NA	NA	NA	NA	NA	NA	NA	NA	NA	164590000	148150000	63083000	242510000	273740000	275720000	428300000	405470000	394150000	P81760	236	10.6
AT5G53560	AT5G53560.1	AT5G53560.1 | Symbols: ATB5-A, B5 #2, ATCB5-E, CB5-E | cytochrome B5 isoform E | chr5:21759628-21760353 FORWARD LENGTH=134	4	4	36.6	36.6	15.084	0	16.717	64	117030000	121060000	78855000	85633000	65561000	78931000	50931000	48446000	50302000	48652000	47236000	70313000	42778000	48375000	41684000	80227000	83106000	64500000	Q42342	134	24.6
AT5G53620	AT5G53620.3;AT5G53620.2;AT5G53620.1	AT5G53620.3 | Symbols: | unknown protein; INVOLVED IN: biological_process unknown; EXPRESSED IN: 23 plant structures; EXPRESSED DURING: 13 growth stages; Has 28929 Blast hits to 19542 proteins in 1425 species: Archae - 211; Bacteria - 3079; Metazoa - 1455	8	8	13.6	13.6	76.316	0	40.817	34	NA	NA	NA	NA	NA	NA	76708000	86840000	94780000	78254000	66443000	65401000	57612000	62261000	78369000	71479000	63070000	69268000	NA	NA	NA
AT5G53895	AT5G53895.1	AT5G53895.1 | Symbols: | unknown protein; BEST Arabidopsis thaliana protein match is: unknown protein (TAIR:AT4G27530.1); Has 30201 Blast hits to 17322 proteins in 780 species: Archae - 12; Bacteria - 1396; Metazoa - 17338; Fungi - 3422; Plants - 5037; Vi	2	2	35.7	35.7	13.496	0	62.718	50	194520000	147780000	202640000	NA	NA	NA	NA	NA	NA	NA	NA	NA	NA	NA	NA	NA	NA	NA	NA	NA	NA
AT5G54160	AT5G54160.1	AT5G54160.1 | Symbols: ATOMT1, OMT1 | O-methyltransferase 1 | chr5:21982075-21984167 FORWARD LENGTH=363	3	3	9.9	9.9	39.618	0	4.0095	3	NA	NA	NA	NA	NA	NA	NA	NA	NA	NA	NA	NA	30574000	13945000	NA	NA	NA	NA	Q9FK25	363	5.2
AT5G54310	AT5G54310.1	AT5G54310.1 | Symbols: NEV, AGD5 | ARF-GAP domain 5 | chr5:22057262-22061066 REVERSE LENGTH=483	4	4	14.1	14.1	52.592	0	18.837	31	NA	NA	NA	NA	NA	NA	52212000	71294000	75809000	79909000	74567000	70834000	66998000	76606000	NA	NA	85666000	70589000	Q9FL69	483	68.3
AT5G54430	AT5G54430.1	AT5G54430.1 | Symbols: ATPHOS32, PHOS32 | Adenine nucleotide alpha hydrolases-like superfamily protein | chr5:22097563-22099693 REVERSE LENGTH=242	7	5	34.3	22.3	26.202	0	24.509	84	NA	NA	NA	76886000	283710000	NA	187700000	185120000	198200000	212550000	176550000	67331000	136550000	154350000	153910000	142800000	192060000	181890000	Q8VYN9	242	30.2
AT5G54740	AT5G54740.1	AT5G54740.1 | Symbols: SESA5 | seed storage albumin 5 | chr5:22238640-22239137 REVERSE LENGTH=165	5	5	37	37	18.871	0	56.189	30	1742900000	1671600000	1484300000	2084100000	1559700000	727880000	NA	NA	NA	NA	NA	NA	NA	NA	NA	NA	NA	NA	Q9FH31	165	7.9
AT5G54760	AT5G54760.3;AT5G54760.2;AT5G54760.1;AT4G27130.1;AT1G54290.1;AT5G54940.2;AT5G54940.1	AT5G54760.3 | Symbols: | Translation initiation factor SUI1 family protein | chr5:22244732-22245517 FORWARD LENGTH=113;AT5G54760.2 | Symbols: | Translation initiation factor SUI1 family protein | chr5:22244732-22245517 FORWARD LENGTH=113;AT5G54760.1 | Sy	4	4	44.2	44.2	12.62	0	18.602	64	91546000	85836000	80501000	64506000	NA	80892000	46672000	69728000	53832000	58822000	60142000	62166000	35763000	52133000	57494000	43488000	38432000	39196000	NA	NA	NA
AT5G54810	AT5G54810.1	AT5G54810.1 | Symbols: TSB1, TRPB, TRP2, ATTSB1 | tryptophan synthase beta-subunit 1 | chr5:22264805-22266738 REVERSE LENGTH=470	4	4	11.3	11.3	50.925	0	11.525	48	NA	NA	NA	72654000	91077000	91446000	107420000	110930000	131510000	74638000	85870000	58191000	69716000	85412000	NA	64586000	89538000	67073000	P14671	470	15.3
AT5G55135	AT5G55135.1	AT5G55135.1 | Symbols: | unknown protein; Has 30201 Blast hits to 17322 proteins in 780 species: Archae - 12; Bacteria - 1396; Metazoa - 17338; Fungi - 3422; Plants - 5037; Viruses - 0; Other Eukaryotes - 2996 (source: NCBI BLink). | chr5:22379959-2238038	2	2	17.9	17.9	12.202	0	4.8403	25	NA	NA	NA	46212000	NA	89342000	56129000	64531000	54105000	35855000	44839000	56993000	NA	NA	NA	NA	NA	NA	NA	NA	NA
AT5G55160	AT5G55160.1;AT5G55160.2	AT5G55160.1 | Symbols: SUM2, SUMO 2, SUMO2, ATSUMO2 | small ubiquitin-like modifier 2 | chr5:22383747-22384772 REVERSE LENGTH=103;AT5G55160.2 | Symbols: SUM2, SUMO 2, SUMO2, ATSUMO2 | small ubiquitin-like modifier 2 | chr5:22383747-22384772 REVERSE LENGTH=	5	3	45.6	34	11.654	0	109.55	223	NA	NA	143580000	433590000	306710000	423530000	427120000	544050000	329890000	464570000	559640000	438040000	311170000	367270000	330610000	400050000	363870000	279440000	Q9FLP6	103	33
AT5G55190	AT5G55190.1;AT5G20020.1;AT5G20010.1	AT5G55190.1 | Symbols: RAN3, ATRAN3 | RAN GTPase 3 | chr5:22392285-22393957 FORWARD LENGTH=221;AT5G20020.1 | Symbols: RAN2 | RAS-related GTP-binding nuclear protein 2 | chr5:6762817-6764381 FORWARD LENGTH=221;AT5G20010.1 | Symbols: RAN-1, RAN1, ATRAN1 | RA	5	5	28.5	28.5	25.079	0	11.4	21	NA	NA	NA	NA	NA	NA	NA	NA	NA	NA	NA	NA	92646000	31170000	40109000	59940000	NA	52749000	Q8H156	221	17.6
AT5G55200	AT5G55200.1	AT5G55200.1 | Symbols: | Co-chaperone GrpE family protein | chr5:22394705-22396335 FORWARD LENGTH=302	9	9	36.1	36.1	33.202	0	70.424	93	NA	NA	NA	163450000	137130000	108410000	152640000	131240000	156640000	122790000	128320000	128080000	85898000	95466000	77183000	NA	50595000	NA	Q9FLP3	302	22.2
AT5G55220	AT5G55220.1	AT5G55220.1 | Symbols: | trigger factor type chaperone family protein | chr5:22397677-22400678 FORWARD LENGTH=547	17	17	30.7	30.7	61.733	0	96.14	113	NA	NA	NA	NA	NA	NA	NA	NA	NA	257640000	296520000	171040000	338880000	340310000	314030000	301710000	381050000	335220000	Q8S9L5	547	1.5
AT5G55280	AT5G55280.1	AT5G55280.1 | Symbols: FTSZ1-1, ATFTSZ1-1, CPFTSZ | homolog of bacterial cytokinesis Z-ring protein FTSZ 1-1 | chr5:22420740-22422527 REVERSE LENGTH=433	5	5	16.6	16.6	45.564	0	24.591	19	NA	NA	NA	NA	NA	NA	NA	NA	NA	NA	NA	24438000	43007000	46564000	51416000	43200000	34782000	39710000	Q42545	433	28.4
AT5G55410	AT5G55410.1;AT5G55410.2	AT5G55410.1 | Symbols: | Bifunctional inhibitor/lipid-transfer protein/seed storage 2S albumin superfamily protein | chr5:22460677-22461081 FORWARD LENGTH=107;AT5G55410.2 | Symbols: | Bifunctional inhibitor/lipid-transfer protein/seed storage 2S albumin	5	5	43	43	11.916	0	31.034	59	408030000	444390000	407340000	540680000	543060000	812660000	175350000	171330000	229420000	NA	NA	NA	NA	NA	NA	NA	NA	NA	NA	NA	NA
AT5G55660	AT5G55660.1	AT5G55660.1 | Symbols: | DEK domain-containing chromatin associated protein | chr5:22539375-22543142 FORWARD LENGTH=778	8	8	10.9	10.9	87.206	0	41.956	28	NA	NA	NA	NA	NA	46229000	55366000	55554000	49790000	51997000	NA	89891000	38561000	NA	NA	NA	NA	NA	NA	NA	NA
AT5G55730	AT5G55730.2;AT5G55730.1	AT5G55730.2 | Symbols: FLA1 | FASCICLIN-like arabinogalactan 1 | chr5:22558375-22560392 REVERSE LENGTH=424;AT5G55730.1 | Symbols: FLA1 | FASCICLIN-like arabinogalactan 1 | chr5:22558375-22560392 REVERSE LENGTH=424	6	6	20.3	20.3	44.849	0	40.113	241	912750000	828630000	826820000	600080000	509890000	899750000	386880000	424400000	421400000	396310000	409410000	654510000	362960000	465040000	532260000	451590000	511120000	483330000	Q9FM65	424	22.9
AT5G56030	AT5G56030.1;AT5G56010.1;AT5G56030.2;AT5G56000.1	AT5G56030.1 | Symbols: HSP81-2, ERD8, HSP90.2, AtHsp90.2 | heat shock protein 81-2 | chr5:22686923-22689433 FORWARD LENGTH=699;AT5G56010.1 | Symbols: HSP81-3, Hsp81.3, AtHsp90-3, AtHsp90.3 | heat shock protein 81-3 | chr5:22681410-22683911 FORWARD LENGTH=6	13	11	16.9	13.4	80.063	0	66.256	97	NA	NA	111890000	97137000	100690000	104240000	NA	134130000	106810000	107760000	117010000	107020000	314590000	109820000	107630000	124330000	87042000	150240000	P55737	699	19.2
AT5G56260	AT5G56260.1	AT5G56260.1 | Symbols: | Ribonuclease E inhibitor RraA/Dimethylmenaquinone methyltransferase | chr5:22775549-22776049 REVERSE LENGTH=166	8	8	70.5	70.5	17.567	0	282.51	189	NA	NA	NA	303210000	482040000	233730000	545020000	399380000	511540000	378410000	500560000	225470000	363610000	447400000	397640000	413570000	362880000	383700000	Q9FH13	166	0
AT5G56360	AT5G56360.1	AT5G56360.1 | Symbols: PSL4 | calmodulin-binding protein | chr5:22823586-22827950 REVERSE LENGTH=647	7	7	13	13	73.213	0	46.288	45	NA	NA	NA	NA	NA	NA	65610000	45865000	72941000	83417000	68189000	70839000	62398000	56135000	53151000	38305000	41441000	NA	Q9FM96	647	90.7
AT5G56500	AT5G56500.2;AT5G56500.1	AT5G56500.2 | Symbols: | TCP-1/cpn60 chaperonin family protein | chr5:22874058-22876966 FORWARD LENGTH=597;AT5G56500.1 | Symbols: | TCP-1/cpn60 chaperonin family protein | chr5:22874058-22876966 FORWARD LENGTH=597	20	4	35.3	9.4	63.324	0	10.179	30	NA	NA	NA	37213000	40654000	41918000	NA	NA	36676000	NA	NA	NA	NA	NA	NA	NA	NA	NA	C0Z361	597	10.6
AT5G56670	AT5G56670.1;AT4G29390.1;AT2G19750.1	AT5G56670.1 | Symbols: | Ribosomal protein S30 family protein | chr5:22935413-22935981 REVERSE LENGTH=62;AT4G29390.1 | Symbols: | Ribosomal protein S30 family protein | chr4:14465212-14465902 REVERSE LENGTH=62;AT2G19750.1 | Symbols: | Ribosomal protein	3	3	19.4	19.4	6.887	0	17.072	162	NA	NA	NA	1101200000	1305600000	311640000	2130600000	1917300000	1600700000	1657700000	1124800000	2398600000	969210000	1040000000	904100000	1259900000	845560000	1243100000	P49689	62	100
AT5G56710	AT5G56710.1;AT4G26230.1;AT2G19740.1;AT5G56710.2	AT5G56710.1 | Symbols: | Ribosomal protein L31e family protein | chr5:22944003-22944767 REVERSE LENGTH=119;AT4G26230.1 | Symbols: | Ribosomal protein L31e family protein | chr4:13286026-13286553 FORWARD LENGTH=119;AT2G19740.1 | Symbols: | Ribosomal prot	2	2	26.1	26.1	13.803	0	78.98	45	NA	NA	NA	NA	30563000	NA	46442000	56043000	51142000	35718000	46440000	36678000	62479000	34107000	NA	37710000	36998000	45824000	P51420	119	20.2
AT5G57120	AT5G57120.1	AT5G57120.1 | Symbols: | FUNCTIONS IN: molecular_function unknown; INVOLVED IN: biological_process unknown; LOCATED IN: nucleolus; EXPRESSED IN: 21 plant structures; EXPRESSED DURING: 13 growth stages; CONTAINS InterPro DOMAIN/s: LisH dimerisation motif (	2	2	9.4	9.4	37.581	0.0014771	2.2283	4	NA	NA	NA	NA	NA	NA	33066000	38899000	NA	NA	NA	NA	NA	NA	NA	NA	NA	NA	NA	NA	NA
AT5G57290	AT5G57290.3;AT5G57290.1;AT5G57290.2	AT5G57290.3 | Symbols: | 60S acidic ribosomal protein family | chr5:23207049-23207835 REVERSE LENGTH=119;AT5G57290.1 | Symbols: | 60S acidic ribosomal protein family | chr5:23207049-23207835 REVERSE LENGTH=120;AT5G57290.2 | Symbols: | 60S acidic ribosom	4	2	36.1	21.8	11.764	0	228.9	88	NA	NA	NA	199640000	305690000	NA	302730000	262220000	381250000	225900000	217400000	163010000	178330000	201100000	265900000	152260000	146570000	167790000	Q9LVC9	120	44.2
AT5G57870	AT5G57870.1;AT5G57870.2	AT5G57870.1 | Symbols: eIFiso4G1 | MIF4G domain-containing protein / MA3 domain-containing protein | chr5:23439755-23443433 FORWARD LENGTH=780;AT5G57870.2 | Symbols: eIFiso4G1 | MIF4G domain-containing protein / MA3 domain-containing protein | chr5:2343975	6	6	10.1	10.1	85.571	0	15.782	27	NA	NA	NA	45460000	NA	53561000	NA	NA	NA	40917000	44400000	48290000	44068000	NA	NA	NA	NA	NA	Q93ZT6	780	40
AT5G58070	AT5G58070.1	AT5G58070.1 | Symbols: ATTIL, TIL | temperature-induced lipocalin | chr5:23500512-23501156 REVERSE LENGTH=186	8	8	47.3	47.3	21.434	0	14.241	113	228700000	234190000	216010000	157450000	267640000	136990000	183280000	171040000	182130000	124160000	162580000	87690000	100250000	140930000	113580000	66837000	125750000	100440000	Q9FGT8	186	17.7
AT5G58590	AT5G58590.1	AT5G58590.1 | Symbols: RANBP1 | RAN binding protein 1 | chr5:23680319-23681714 REVERSE LENGTH=219	12	9	57.5	41.6	24.722	0	323.31	104	118630000	NA	211800000	314220000	386430000	435880000	259760000	234610000	351370000	234620000	185050000	281340000	211170000	165430000	NA	140030000	195530000	162940000	P92985	219	44.7
AT5G59850	AT5G59850.1;AT1G07770.2;AT1G07770.1;AT3G46040.1;AT2G39590.1	AT5G59850.1 | Symbols: | Ribosomal protein S8 family protein | chr5:24112499-24113084 REVERSE LENGTH=130;AT1G07770.2 | Symbols: RPS15A | ribosomal protein S15A | chr1:2408413-2409065 REVERSE LENGTH=130;AT1G07770.1 | Symbols: RPS15A | ribosomal protein S15	2	2	13.1	13.1	14.804	0.0050798	2.0938	3	NA	NA	NA	NA	NA	NA	NA	NA	NA	NA	NA	NA	2676500000	1292400000	1276500000	NA	NA	NA	P42798	130	0
AT5G59880	AT5G59880.2;AT5G59880.1	AT5G59880.2 | Symbols: ADF3 | actin depolymerizing factor 3 | chr5:24120382-24121628 FORWARD LENGTH=124;AT5G59880.1 | Symbols: ADF3 | actin depolymerizing factor 3 | chr5:24120382-24121628 FORWARD LENGTH=139	3	3	39.5	39.5	14.124	0	38.662	29	NA	NA	NA	NA	NA	NA	NA	NA	NA	NA	56115000	NA	NA	64298000	42568000	NA	51875000	48646000	Q9ZSK4	139	0
AT5G59950	AT5G59950.2;AT5G59950.3;AT5G59950.1;AT5G59950.5;AT5G59950.4	AT5G59950.2 | Symbols: | RNA-binding (RRM/RBD/RNP motifs) family protein | chr5:24140629-24141504 FORWARD LENGTH=178;AT5G59950.3 | Symbols: | RNA-binding (RRM/RBD/RNP motifs) family protein | chr5:24140235-24141504 FORWARD LENGTH=242;AT5G59950.1 | Symbol	4	4	22.5	22.5	18.887	0	3.9574	25	NA	NA	NA	NA	NA	NA	41876000	44520000	50276000	48829000	58317000	37576000	NA	NA	NA	47059000	47544000	63213000	Q8L773	244	76.6
AT5G60360	AT5G60360.2;AT5G60360.1;AT5G60360.3	AT5G60360.2 | Symbols: AALP, ALP | aleurain-like protease | chr5:24280044-24282152 FORWARD LENGTH=357;AT5G60360.1 | Symbols: SAG2, AALP, ALP | aleurain-like protease | chr5:24280044-24282152 FORWARD LENGTH=358;AT5G60360.3 | Symbols: AALP, ALP | aleurain-li	4	2	15.4	12	38.902	0	9.8587	12	NA	NA	NA	NA	NA	NA	NA	NA	NA	NA	NA	NA	NA	75279000	NA	80357000	95241000	NA	Q8H166	358	3.9
AT5G60390	AT5G60390.3;AT5G60390.1;AT1G07940.2;AT1G07940.1;AT1G07930.1;AT1G07920.1;AT1G07930.2;AT5G60390.2	AT5G60390.3 | Symbols: | GTP binding Elongation factor Tu family protein | chr5:24289226-24290675 FORWARD LENGTH=449;AT5G60390.1 | Symbols: | GTP binding Elongation factor Tu family protein | chr5:24289226-24290675 FORWARD LENGTH=449;AT1G07940.2 | Symbol	6	6	12.5	12.5	49.502	0	84.713	114	294310000	539560000	500500000	206870000	153660000	269970000	124980000	148190000	157290000	138540000	175020000	226190000	230400000	123020000	119860000	139660000	122670000	159730000	Q8GTY0	449	4
AT5G60640	AT5G60640.1;AT5G60640.2;AT5G60640.3	AT5G60640.1 | Symbols: ATPDIL1-4, PDI2, ATPDI2, PDIL1-4 | PDI-like 1-4 | chr5:24371141-24373993 REVERSE LENGTH=597;AT5G60640.2 | Symbols: ATPDIL1-4, PDIL1-4 | PDI-like 1-4 | chr5:24371416-24373993 REVERSE LENGTH=536;AT5G60640.3 | Symbols: PDIL1-4 | PDI-lik	20	20	38.7	38.7	66.356	0	130.7	208	NA	NA	NA	27161000	478670000	279220000	308220000	262930000	312080000	626100000	689180000	71745000	431870000	533680000	500810000	206350000	359480000	349460000	Q9FF55	597	25.3
AT5G60980	AT5G60980.1;AT5G60980.2	AT5G60980.1 | Symbols: | Nuclear transport factor 2 (NTF2) family protein with RNA binding (RRM-RBD-RNP motifs) domain | chr5:24543988-24546027 FORWARD LENGTH=459;AT5G60980.2 | Symbols: | Nuclear transport factor 2 (NTF2) family protein with RNA binding	8	8	20.9	20.9	49.415	0	45.665	100	NA	NA	NA	NA	75425000	89261000	120310000	100710000	122710000	122750000	117750000	71761000	93249000	137540000	123670000	122730000	98044000	106000000	Q9FME2	460	57.4
AT5G61030	AT5G61030.1	AT5G61030.1 | Symbols: GR-RBP3 | glycine-rich RNA-binding protein 3 | chr5:24560870-24562152 FORWARD LENGTH=309	4	4	15.2	15.2	29.984	0	43.076	91	NA	NA	NA	195040000	134970000	113980000	125170000	132720000	142660000	140800000	145570000	129560000	80008000	101730000	102040000	60104000	NA	74209000	Q9FNR1	309	64.7
AT5G61130	AT5G61130.1	AT5G61130.1 | Symbols: PDCB1 | plasmodesmata callose-binding protein 1 | chr5:24587438-24589369 REVERSE LENGTH=201	3	3	25.4	25.4	20.364	0	38.204	51	NA	NA	NA	NA	NA	NA	NA	NA	NA	115600000	121070000	201640000	127990000	119880000	NA	157900000	NA	149560000	Q9FNQ2	201	33.8
AT5G62300	AT5G62300.2;AT5G62300.1;AT3G45030.1;AT3G47370.3;AT3G47370.2;AT3G47370.1	AT5G62300.2 | Symbols: | Ribosomal protein S10p/S20e family protein | chr5:25021388-25022235 REVERSE LENGTH=124;AT5G62300.1 | Symbols: | Ribosomal protein S10p/S20e family protein | chr5:25021388-25022235 REVERSE LENGTH=124;AT3G45030.1 | Symbols: | Ribo	3	3	20.2	20.2	13.878	0	3.7981	16	NA	NA	NA	NA	NA	NA	NA	NA	NA	NA	NA	NA	61411000	31476000	31151000	40352000	32264000	41020000	P49200	124	18.5
AT5G62700	AT5G62700.1;AT5G62690.1	AT5G62700.1 | Symbols: TUB3 | tubulin beta chain 3 | chr5:25184501-25186426 FORWARD LENGTH=450;AT5G62690.1 | Symbols: TUB2 | tubulin beta chain 2 | chr5:25181560-25183501 FORWARD LENGTH=450	7	4	24.4	14.4	50.733	0	56.743	60	NA	NA	NA	NA	NA	NA	74963000	102370000	62962000	91722000	92662000	74201000	173650000	112360000	104780000	94515000	89614000	107110000	Q9ASR0	450	8
AT5G63030	AT5G63030.1	AT5G63030.1 | Symbols: | Thioredoxin superfamily protein | chr5:25286352-25287517 FORWARD LENGTH=125	5	5	47.2	47.2	13.61	0	323.31	142	421280000	467010000	593140000	1227400000	1407400000	1315100000	976410000	953330000	983630000	691110000	736400000	617000000	438200000	534160000	685240000	517080000	471340000	477540000	Q8L8T2	125	14.4
AT5G63310	AT5G63310.1	AT5G63310.1 | Symbols: NDPK2, NDPK1A, NDPK IA IA, NDPK IA, ATNDPK2 | nucleoside diphosphate kinase 2 | chr5:25372122-25373838 REVERSE LENGTH=231	2	2	9.1	9.1	25.55	0	4.5161	16	NA	NA	NA	NA	NA	NA	NA	NA	NA	NA	NA	NA	50766000	34932000	38559000	66236000	48031000	62060000	O64903	231	11.3
AT5G63400	AT5G63400.1	AT5G63400.1 | Symbols: ADK1 | adenylate kinase 1 | chr5:25393274-25394817 REVERSE LENGTH=246	13	11	47.6	40.7	26.932	0	173.28	361	533880000	569740000	638130000	560470000	439830000	615570000	483890000	469260000	426740000	530290000	543940000	670720000	369970000	441990000	490680000	451180000	417110000	431470000	O82514	246	15
AT5G63570	AT5G63570.1;AT3G48730.1	AT5G63570.1 | Symbols: GSA1 | glutamate-1-semialdehyde-2,1-aminomutase | chr5:25451957-25453620 FORWARD LENGTH=474;AT3G48730.1 | Symbols: GSA2 | glutamate-1-semialdehyde 2,1-aminomutase 2 | chr3:18049697-18051550 FORWARD LENGTH=472	4	4	13.9	13.9	50.369	0	9.1249	11	NA	NA	NA	NA	NA	NA	NA	NA	NA	NA	NA	NA	94298000	NA	NA	59455000	NA	85647000	P42799	474	9.3
AT5G63980	AT5G63980.1	AT5G63980.1 | Symbols: SAL1, ALX8, ATSAL1, HOS2, FRY1, RON1 | Inositol monophosphatase family protein | chr5:25609840-25611802 FORWARD LENGTH=407	16	16	46.7	46.7	43.509	0	291.42	240	NA	NA	NA	180630000	516470000	251140000	417870000	343670000	443020000	512880000	472900000	155990000	317470000	446320000	378830000	335850000	493080000	361250000	Q42546	353	0
AT5G64040	AT5G64040.1;AT5G64040.2	AT5G64040.1 | Symbols: PSAN | photosystem I reaction center subunit PSI-N, chloroplast, putative / PSI-N, putative (PSAN) | chr5:25628724-25629409 REVERSE LENGTH=171;AT5G64040.2 | Symbols: PSAN | photosystem I reaction center subunit PSI-N, chloroplast, pu	4	4	19.9	19.9	18.429	0	29.028	19	NA	NA	NA	NA	NA	NA	NA	NA	NA	NA	NA	NA	NA	38969000	43257000	40138000	37289000	41257000	P49107	171	0
AT5G64080	AT5G64080.2;AT5G64080.1	AT5G64080.2 | Symbols: | Bifunctional inhibitor/lipid-transfer protein/seed storage 2S albumin superfamily protein | chr5:25645475-25646638 REVERSE LENGTH=178;AT5G64080.1 | Symbols: | Bifunctional inhibitor/lipid-transfer protein/seed storage 2S albumin	2	2	11.2	11.2	17.633	0	9.2804	137	4343200000	4468700000	3282500000	5233300000	5649900000	6390000000	3790000000	3616600000	4976800000	2653300000	2033100000	4386600000	2126200000	2309900000	2999900000	NA	2536200000	2850000000	Q8VYI9	182	23.1
AT5G64130	AT5G64130.1;AT5G64130.3	AT5G64130.1 | Symbols: | cAMP-regulated phosphoprotein 19-related protein | chr5:25664547-25665339 REVERSE LENGTH=115;AT5G64130.3 | Symbols: | cAMP-regulated phosphoprotein 19-related protein | chr5:25664547-25665339 REVERSE LENGTH=140	7	6	61.7	53.9	12.299	0	85.406	237	NA	NA	102190000	416410000	283340000	614060000	544800000	624650000	526030000	673880000	670570000	897900000	622350000	661860000	664680000	798730000	650310000	644770000	NA	NA	NA
AT5G64350	AT5G64350.1	AT5G64350.1 | Symbols: FKBP12, ATFKBP12 | FK506-binding protein 12 | chr5:25734810-25735990 REVERSE LENGTH=112	3	3	49.1	49.1	11.987	0	10.51	50	NA	NA	NA	139280000	134220000	139150000	202880000	214640000	162270000	226520000	196900000	127690000	126440000	137750000	NA	121390000	120280000	110450000	Q8LGG0	112	18.8
AT5G64430	AT5G64430.1	AT5G64430.1 | Symbols: | Octicosapeptide/Phox/Bem1p family protein | chr5:25762540-25764081 REVERSE LENGTH=513	7	6	18.9	15.6	56.44	0	189.74	58	NA	NA	NA	90309000	104390000	188340000	66443000	83661000	101980000	86148000	NA	83129000	47228000	79090000	76191000	75198000	66325000	73570000	NA	NA	NA
AT5G65220	AT5G65220.1	AT5G65220.1 | Symbols: | Ribosomal L29 family protein | chr5:26061301-26062506 FORWARD LENGTH=173	3	3	22.5	22.5	19.377	0	9.5774	53	NA	NA	NA	NA	NA	NA	74186000	56742000	NA	100670000	96347000	105180000	122130000	113720000	NA	147010000	123220000	164870000	Q9FJP3	173	77.5
AT5G66030	AT5G66030.2;AT5G66030.1	AT5G66030.2 | Symbols: ATGRIP, GRIP | Golgi-localized GRIP domain-containing protein | chr5:26405133-26409888 REVERSE LENGTH=765;AT5G66030.1 | Symbols: ATGRIP, GRIP | Golgi-localized GRIP domain-containing protein | chr5:26405133-26409888 REVERSE LENGTH=78	12	12	17.4	17.4	87.55	0	54.499	76	NA	NA	NA	70424000	49423000	70836000	102680000	110660000	108700000	114260000	105200000	128150000	91058000	76784000	93712000	66332000	101830000	77293000	Q8S2T0	788	90.5
AT5G66040	AT5G66040.1;AT5G66040.2	AT5G66040.1 | Symbols: STR16 | sulfurtransferase protein 16 | chr5:26410557-26411139 FORWARD LENGTH=120;AT5G66040.2 | Symbols: STR16 | sulfurtransferase protein 16 | chr5:26410871-26411139 FORWARD LENGTH=65	4	4	63.3	63.3	12.676	0	70.027	71	78680000	115780000	144850000	108370000	104100000	118440000	81299000	101370000	91900000	120340000	122280000	81681000	107100000	104320000	75209000	117620000	112960000	118840000	Q39129	120	3.3
AT5G66170	AT5G66170.3;AT5G66170.1;AT5G66170.2	AT5G66170.3 | Symbols: STR18 | sulfurtransferase 18 | chr5:26447828-26448586 FORWARD LENGTH=136;AT5G66170.1 | Symbols: STR18 | sulfurtransferase 18 | chr5:26447828-26448582 FORWARD LENGTH=136;AT5G66170.2 | Symbols: STR18 | sulfurtransferase 18 | chr5:26447	5	5	53.7	53.7	14.882	0	39.718	89	61871000	NA	93294000	256820000	253460000	289220000	170490000	200560000	167320000	88425000	109940000	129310000	112290000	114350000	80813000	153340000	138750000	107640000	Q9FKW8	136	22.8
AT5G66570	AT5G66570.1	AT5G66570.1 | Symbols: PSBO-1, OEE1, OEE33, OE33, PSBO1, MSP-1 | PS II oxygen-evolving complex 1 | chr5:26568744-26570124 FORWARD LENGTH=332	21	8	61.4	32.5	35.142	0	323.31	859	NA	NA	NA	235480000	156350000	535500000	1004900000	1124500000	936790000	3763700000	3704800000	3866500000	7148400000	6384900000	6171500000	10800000000	10600000000	10000000000	P23321	332	25
AT5G67360	AT5G67360.1	AT5G67360.1 | Symbols: ARA12 | Subtilase family protein | chr5:26872192-26874465 REVERSE LENGTH=757	6	6	13.1	13.1	79.414	0	21.021	32	NA	NA	NA	NA	NA	35906000	54529000	48448000	38306000	NA	NA	NA	80697000	34213000	42597000	52311000	37317000	76561000	O65351	757	0
ATCG00120	ATCG00120.1	ATCG00120.1 | Symbols: ATPA | ATP synthase subunit alpha | chrC:9938-11461 REVERSE LENGTH=507	5	5	12.8	12.8	55.328	0	109.95	22	NA	NA	NA	NA	NA	NA	NA	NA	NA	NA	32178000	NA	83800000	47958000	52846000	54002000	50930000	70770000	P56757	507	0
ATCG00480	ATCG00480.1	ATCG00480.1 | Symbols: ATPB, PB | ATP synthase subunit beta | chrC:52660-54156 REVERSE LENGTH=498	6	5	15.3	13.1	53.933	0	53.055	18	NA	NA	NA	NA	NA	NA	NA	NA	NA	NA	NA	NA	66503000	NA	NA	73217000	47202000	53785000	P19366	498	4.6
ATCG00490	ATCG00490.1	ATCG00490.1 | Symbols: RBCL | ribulose-bisphosphate carboxylases | chrC:54958-56397 FORWARD LENGTH=479	25	25	52.8	52.8	52.954	0	323.31	710	31318000	NA	178290000	70197000	101770000	120510000	333990000	379050000	221040000	543060000	815550000	1127100000	11300000000	1961100000	2250000000	5745600000	3495300000	6732300000	O03042	479	2.7
ATCG01060	ATCG01060.1	ATCG01060.1 | Symbols: PSAC | iron-sulfur cluster binding;electron carriers;4 iron, 4 sulfur cluster binding | chrC:117318-117563 REVERSE LENGTH=81	3	3	33.3	33.3	9.0384	0	6.22	10	NA	NA	NA	NA	NA	NA	NA	NA	NA	NA	NA	NA	29745000	68711000	29088000	NA	NA	NA	P62090	81	0
ATCG01240	ATCG01240.1;ATCG00900.1	ATCG01240.1 | Symbols: RPS7.2 | ribosomal protein S7 | chrC:140704-141171 FORWARD LENGTH=155;ATCG00900.1 | Symbols: RPS7.1, RPS7 | Ribosomal protein S7p/S5e family protein | chrC:97478-97945 REVERSE LENGTH=155	4	4	24.5	24.5	17.357	0	5.0024	12	NA	NA	NA	NA	NA	NA	NA	NA	NA	NA	NA	NA	NA	NA	NA	71534000	59513000	54668000	P61841	155	51

## Sheet: Supplemental Table S5
Supplemental Table S5: Functional enrichment of MapMan bins of heat-stable proteins found in dry seeds (DS), germinating seeds and seedlings at indicated time points after imbibition. Enrichment analysis was processed by CorTo (P-value threshold of 0.01). Benjamini & Hochberg correction was applied to the P-values. P-values were calculated to Z-score using the inverse normal cumulative distributi…
BINs	z-score of enriched MapMan bins from different time points after imbibition
	DS	24 h	36 h	48 h	60 h	72 h
1 PS	0	3.69524	4.76233	5.53295	7.92502	8.96964
1.1 PS.lightreaction	0	0	0	0	3.92551	4.46828
1.3 PS.calvin cycle	0	4.36976	5.59657	6.7062	7.78829	8.53732
4 glycolysis	0	2.62342	0	0	0	0
4.1 glycolysis.cytosolic branch	0	2.78222	0	0	0	0
6 gluconeogenesis / glyoxylate cycle	0	0	0	0	2.62893	2.61505
8 TCA / org transformation	0	0	2.67288	0	2.58863	3.78539
8.1 TCA / org transformation.TCA	0	0	2.60319	0	0	4.01887
9 mitochondrial electron transport / ATP synthesis	0	0	2.60319	0	0	0
10.5 cell wall.cell wall proteins	0	0	3.04659	3.23626	0	2.89417
11 lipid metabolism	3.13544	0	0	0	0	0
11.1 lipid metabolism.FA synthesis and FA elongation	2.79247	0	0	0	0	0
11.4 lipid metabolism.TAG synthesis	4.19684	0	0	0	0	0
11.6 lipid metabolism.lipid transfer proteins etc	0	4.09752	3.85679	3.02234	3.09618	3.73735
15 metal handling	0	0	2.83596	3.08658	2.76553	3.60451
15.2 metal handling.binding, chelation and storage	0	0	2.88525	3.21725	3.33647	4.22478
16 secondary metabolism	0	0	2.87931	2.69233	0	2.61505
19 tetrapyrrole synthesis	0	0	0	0	0	3.6024
19.10 tetrapyrrole synthesis.magnesium chelatase	0	0	2.61929	0	2.57809	0
20 stress	4.86132	5.36231	4.64167	3.51113	2.9409	3.39443
20.2 stress.abiotic	5.62635	7.12504	6.73208	6.01571	5.70598	5.70531
21 redox	8.257	9.73163	9.19425	9.73333	10.7563	10.7737
21.1 redox.thioredoxin	3.87527	5.75104	5.73811	5.89338	6.84608	6.33369
21.2 redox.ascorbate and glutathione	0	2.58332	2.81055	2.64189	2.75294	3.19505
21.4 redox.glutaredoxins	0	3.05811	2.81055	2.64452	2.75294	2.70671
21.5 redox.peroxiredoxin	5.29668	4.6562	3.66476	5.05747	5.14367	5.78368
21.6 redox.dismutases and catalases	5.12652	5.1994	4.97648	5.49003	6.23022	6.18319
23 nucleotide metabolism	0	0	0	0	0	2.75991
23.4 nucleotide metabolism.phosphotransfer and pyrophosphatases	2.62293	2.62748	0	3.44821	4.12654	4.5756
24.1 Biodegradation of Xenobiotics.hydroxyacylglutathione hydrolase	0	2.58332	0	0	0	0
26.19 misc.plastocyanin-like	4.03178	2.61068	4.17649	3.98085	4.08794	4.01887
26.21 misc.protease inhibitor/seed storage/lipid transfer protein (LTP) family protein	3.87527	2.78222	2.86192	3.45774	3.22831	2.72851
27.3 RNA.regulation of transcription	0	3.10473	3.63129	3.06466	4.47282	4.42365
27.4 RNA.RNA binding	3.0348	5.80723	6.43871	5.8034	6.05056	6.18319
28 DNA	5.47883	7.15705	7.5502	7.92347	8.27962	8.95739
28.1 DNA.synthesis/chromatin structure	0	7.50836	7.57437	8.27382	8.41018	9.03941
29 protein	0	2.73707	4.30587	4.32969	4.52402	4.45807
29.2 protein.synthesis	0	2.78222	5.73811	6.11903	6.06145	6.59386
29.6 protein.folding	2.7164	7.12504	7.06139	7.92347	7.78784	7.26629
30.2 signalling.receptor kinases	0	0	2.81055	3.07772	0	0
30.3 signalling.calcium	2.694	2.8885	2.75711	3.66516	3.27453	2.82899
30.7 signalling.14-3-3 proteins	0	0	0	3.19259	3.27453	0
31 cell	0	2.62748	4.70454	4.05432	4.26039	3.73735
31.1 cell.organisation	0	0	3.22618	2.75501	0	2.8265
31.99 cell.unspecified	0	0	2.81055	2.71739	2.76402	2.75991
33 development	6.1074	3.56407	2.81055	0	0	0
33.1 development.storage proteins	7.36586	6.43587	5.64394	5.45303	5.58989	5.49506
33.2 development.late embryogenesis abundant	7.36586	5.90572	5.64394	4.92963	3.87159	3.79591
34 transport	0	2.59158	0	2.88647	0	2.82603
35 not assigned	5.72783	6.17174	6.95361	6.64664	8.17356	8.69193
35.2 not assigned.unknown	5.62635	7.43032	8.18651	7.92347	8.81388	9.03941

## Sheet: Supplemental Table S6
Supplemental Table S6: LFQ intensities, annotation and disorder content of fully folded (0% disorder) and fully disordered (100% disorder) heat-stable proteins in dry seeds (DS), germinating seeds and seedlings at indicated time points after imbibition (see Fig. 5). Contaminants, proteins with unique peptides of 1 and proteins with 2 or more than missing values in all time points were excluded. M…
0% disorder (refer to Fig. 5A)
Main protein IDs	Majority protein IDs	Fasta headers	Peptides	Unique peptides	Sequence coverage [%]	Unique sequence coverage [%]	Mol. weight [kDa]	Q-value	Score	MS/MS count	LFQ intensities of heat-stable proteins of samples different time point after imbibition (n = 3)																		UniprotKB.ID	Length (residues)	Disorder content (%)
											DS_1	DS_2	DS_3	24 h_1	24 h_2	24 h_3	36 h_1	36 h_2	36 h_3	48 h_1	48 h_2	48 h_3	60 h_1	60 h_2	60 h_3	72 h_1	72 h_2	72 h_3
AT1G04410	AT1G04410.1	AT1G04410.1 | Symbols: | Lactate/malate dehydrogenase family protein | chr1:1189418-1191267 REVERSE LENGTH=332	7	7	25.9	25.9	35.571	0	19.977	133	NA	NA	244380000	112370000	211150000	134350000	296890000	285480000	232090000	273920000	309850000	177720000	466400000	237490000	261620000	263780000	217330000	300280000	P93819	332	0
AT1G11910	AT1G11910.1	AT1G11910.1 | Symbols: APA1, ATAPA1 | aspartic proteinase A1 | chr1:4017119-4019874 REVERSE LENGTH=506	7	5	22.3	17.4	54.613	0	83.182	161	557270000	331720000	456070000	886720000	1174600000	549060000	764460000	760670000	588520000	433870000	611310000	460730000	484200000	516040000	NA	211370000	299410000	275770000	O65390	506	0
AT1G12250	AT1G12250.2;AT1G12250.1	AT1G12250.2 | Symbols: | Pentapeptide repeat-containing protein | chr1:4159623-4161269 FORWARD LENGTH=206;AT1G12250.1 | Symbols: | Pentapeptide repeat-containing protein | chr1:4159287-4161269 FORWARD LENGTH=280	4	4	31.6	31.6	21.768	0	20.571	35	NA	NA	NA	NA	NA	NA	NA	NA	NA	NA	NA	39280000	65113000	47893000	52856000	101810000	92781000	80989000	Q8H1Q1	280	0
AT1G13440	AT1G13440.1;AT1G13440.2	AT1G13440.1 | Symbols: GAPC-2, GAPC2 | glyceraldehyde-3-phosphate dehydrogenase C2 | chr1:4608465-4610494 REVERSE LENGTH=338;AT1G13440.2 | Symbols: GAPC-2, GAPC2 | glyceraldehyde-3-phosphate dehydrogenase C2 | chr1:4608465-4610494 REVERSE LENGTH=310	15	2	53.3	10.4	36.913	0	181.24	316	615170000	156690000	804130000	1150300000	515800000	714730000	548650000	527810000	419130000	288340000	315920000	957110000	1119200000	366320000	466970000	468680000	381130000	600160000	Q9FX54	338	0
AT1G18080	AT1G18080.1	AT1G18080.1 | Symbols: ATARCA, RACK1A_AT, RACK1A | Transducin/WD40 repeat-like superfamily protein | chr1:6222325-6223901 FORWARD LENGTH=327	5	3	17.4	12.5	35.747	0	7.5249	18	NA	NA	NA	NA	NA	NA	35352000	28069000	20484000	NA	21219000	30407000	97118000	18864000	NA	NA	16418000	49433000	O24456	327	0
AT1G24020	AT1G24020.2;AT1G24020.1	AT1G24020.2 | Symbols: MLP423 | MLP-like protein 423 | chr1:8500653-8501458 REVERSE LENGTH=155;AT1G24020.1 | Symbols: MLP423 | MLP-like protein 423 | chr1:8500653-8501458 REVERSE LENGTH=155	6	6	43.2	43.2	17.054	0	27.676	48	NA	NA	NA	NA	NA	NA	NA	NA	NA	151440000	170030000	NA	176510000	229190000	233180000	135860000	162880000	144070000	Q93VR4	155	0
AT1G33140	AT1G33140.1;AT1G33120.1;AT4G10450.1	AT1G33140.1 | Symbols: PGY2 | Ribosomal protein L6 family | chr1:12023360-12024502 FORWARD LENGTH=194;AT1G33120.1 | Symbols: | Ribosomal protein L6 family | chr1:12010986-12012223 FORWARD LENGTH=194;AT4G10450.1 | Symbols: | Ribosomal protein L6 family |	4	4	23.7	23.7	22.017	0	71.617	28	NA	NA	NA	NA	NA	NA	NA	40593000	NA	NA	32732000	83508000	113940000	27694000	36644000	34387000	33838000	52349000	P49209	194	0
AT1G45145	AT1G45145.1	AT1G45145.1 | Symbols: ATTRX5, ATH5, LIV1, TRX5 | thioredoxin H-type 5 | chr1:17075264-17076256 REVERSE LENGTH=118	3	3	33.9	33.9	13.122	0	67.614	22	NA	NA	NA	NA	NA	NA	NA	NA	NA	45430000	50472000	NA	NA	NA	NA	42339000	35419000	39206000	Q39241	118	0
AT1G47420	AT1G47420.1	AT1G47420.1 | Symbols: SDH5 | succinate dehydrogenase 5 | chr1:17395774-17397176 REVERSE LENGTH=257	3	3	19.1	19.1	28.106	0	62.836	28	NA	NA	NA	NA	NA	NA	53431000	NA	NA	57319000	48233000	NA	37904000	43320000	NA	NA	52891000	NA	Q9SX77	257	0
AT1G47540	AT1G47540.1;AT1G47540.2	AT1G47540.1 | Symbols: | Scorpion toxin-like knottin superfamily protein | chr1:17455702-17456146 REVERSE LENGTH=98;AT1G47540.2 | Symbols: | Scorpion toxin-like knottin superfamily protein | chr1:17455702-17456146 REVERSE LENGTH=99	4	4	29.6	29.6	10.993	0	323.31	881	31900000000	32100000000	26000000000	22700000000	15200000000	23000000000	14300000000	10500000000	12800000000	5595200000	5350700000	9828400000	1890100000	3225800000	2873800000	1620200000	1715600000	1896500000	Q42330	98	0
AT1G47710	AT1G47710.1	AT1G47710.1 | Symbols: | Serine protease inhibitor (SERPIN) family protein | chr1:17558271-17560061 FORWARD LENGTH=391	10	10	28.9	28.9	42.639	0	25.867	64	NA	NA	42589000	99492000	203910000	107340000	111750000	82420000	114110000	53175000	53690000	75907000	46630000	62767000	58948000	41097000	52603000	63447000	Q9S7T8	391	0
AT1G56070	AT1G56070.1	AT1G56070.1 | Symbols: LOS1 | Ribosomal protein S5/Elongation factor G/III/V family protein | chr1:20968245-20971077 REVERSE LENGTH=843	18	11	21	13.9	93.89	0	149.02	181	NA	NA	480040000	353410000	639220000	291180000	536950000	609500000	516140000	392520000	446460000	277670000	788500000	332730000	328520000	310100000	328640000	428150000	Q9ASR1	843	0
AT1G62290	AT1G62290.2;AT1G62290.1	AT1G62290.2 | Symbols: | Saposin-like aspartyl protease family protein | chr1:23010107-23012681 REVERSE LENGTH=513;AT1G62290.1 | Symbols: | Saposin-like aspartyl protease family protein | chr1:23010107-23012681 REVERSE LENGTH=513	7	5	19.9	15	55.748	0	151.6	141	193990000	113570000	232370000	282780000	450200000	126920000	235500000	221430000	279070000	196010000	274460000	75621000	NA	84345000	89812000	NA	NA	NA	Q8VYL3	513	0
AT1G65290	AT1G65290.1	AT1G65290.1 | Symbols: mtACP2 | mitochondrial acyl carrier protein 2 | chr1:24249088-24250366 REVERSE LENGTH=126	2	2	23.8	23.8	14.167	0	3.5343	17	NA	NA	NA	NA	NA	NA	NA	NA	NA	NA	NA	NA	NA	NA	NA	59549000	55888000	39305000	O80800	126	0
AT1G65930	AT1G65930.1	AT1G65930.1 | Symbols: cICDH | cytosolic NADP+-dependent isocitrate dehydrogenase | chr1:24539088-24541861 FORWARD LENGTH=410	9	9	26.6	26.6	45.746	0	25.889	22	NA	NA	15132000	NA	NA	NA	NA	NA	NA	NA	NA	NA	149420000	NA	NA	18517000	13470000	31953000	Q9SRZ6	410	0
AT1G65980	AT1G65980.1	AT1G65980.1 | Symbols: TPX1 | thioredoxin-dependent peroxidase 1 | chr1:24559524-24560753 REVERSE LENGTH=162	8	6	70.4	56.8	17.428	0	235.83	414	607870000	725580000	848820000	1011600000	1869800000	852590000	847500000	775080000	882330000	1088700000	1186100000	388670000	524480000	835720000	556000000	463970000	679640000	392480000	Q9XEX2	162	0
AT1G73260	AT1G73260.1	AT1G73260.1 | Symbols: ATKTI1, KTI1 | kunitz trypsin inhibitor 1 | chr1:27547410-27548057 REVERSE LENGTH=215	4	3	30.2	21.4	23.793	0	8.7863	14	NA	NA	NA	NA	NA	NA	NA	NA	NA	61018000	NA	NA	NA	NA	NA	82495000	72325000	81079000	Q8RXD5	215	0
AT1G75830	AT1G75830.1	AT1G75830.1 | Symbols: LCR67, PDF1.1 | low-molecular-weight cysteine-rich 67 | chr1:28472405-28472754 FORWARD LENGTH=80	4	4	52.5	52.5	8.7092	0	212.85	264	36700000000	37100000000	32800000000	6130000000	3575200000	8300000000	1982700000	3114900000	2767900000	1156300000	1646400000	1213100000	720090000	730650000	512230000	646470000	809780000	582650000	P30224	80	0
AT1G78380	AT1G78380.1	AT1G78380.1 | Symbols: ATGSTU19, GST8, GSTU19 | glutathione S-transferase TAU 19 | chr1:29486659-29487819 REVERSE LENGTH=219	4	4	15.1	15.1	25.65	0	12.457	27	NA	NA	NA	NA	NA	NA	NA	NA	NA	NA	NA	23977000	134360000	24497000	NA	74854000	34215000	94265000	Q9ZRW8	219	0
AT1G78830	AT1G78830.1	AT1G78830.1 | Symbols: | Curculin-like (mannose-binding) lectin family protein | chr1:29637141-29638508 REVERSE LENGTH=455	3	3	8.8	8.8	50.342	0	7.9481	14	NA	NA	NA	NA	NA	NA	NA	NA	NA	NA	NA	NA	NA	35333000	36631000	56518000	45216000	50785000	Q9ZVA2	455	0
AT1G79210	AT1G79210.3;AT1G79210.2;AT1G79210.1;AT1G16470.2;AT1G16470.1	AT1G79210.3 | Symbols: | N-terminal nucleophile aminohydrolases (Ntn hydrolases) superfamily protein | chr1:29796286-29798240 REVERSE LENGTH=235;AT1G79210.2 | Symbols: | N-terminal nucleophile aminohydrolases (Ntn hydrolases) superfamily protein | chr1:2	7	7	32.3	32.3	25.733	0	9.6379	36	NA	NA	NA	NA	56266000	36640000	NA	NA	NA	NA	NA	NA	NA	NA	NA	42179000	33134000	46396000	Q8L4A7	235	0
AT2G13360	AT2G13360.2;AT2G13360.1	AT2G13360.2 | Symbols: AGT, AGT1, SGAT | alanine:glyoxylate aminotransferase | chr2:5539417-5540902 REVERSE LENGTH=401;AT2G13360.1 | Symbols: AGT, AGT1, SGAT | alanine:glyoxylate aminotransferase | chr2:5539417-5540902 REVERSE LENGTH=401	3	3	8.5	8.5	44.207	0	4.3303	12	NA	NA	NA	NA	NA	NA	NA	NA	NA	NA	NA	NA	58621000	NA	NA	46267000	37237000	60956000	Q56YA5	401	0
AT2G15010	AT2G15010.1	AT2G15010.1 | Symbols: | Plant thionin | chr2:6484422-6485001 FORWARD LENGTH=135	2	2	23	23	14.259	0	323.31	118	423340000	336380000	300390000	332050000	178410000	228640000	348090000	430060000	184700000	166290000	295070000	123800000	98587000	131300000	106480000	115110000	46623000	81177000	Q8VZK8	135	0
AT2G16600	AT2G16600.2;AT2G16600.1	AT2G16600.2 | Symbols: ROC3 | rotamase CYP 3 | chr2:7200862-7201383 FORWARD LENGTH=151;AT2G16600.1 | Symbols: ROC3 | rotamase CYP 3 | chr2:7200862-7201383 FORWARD LENGTH=173	3	2	23.8	19.2	15.992	0	21.998	65	138310000	218890000	161700000	152270000	126400000	200820000	223750000	210530000	171460000	176870000	220200000	129940000	154770000	NA	190880000	140680000	147580000	145480000	Q38900	173	0
AT2G17120	AT2G17120.1	AT2G17120.1 | Symbols: LYM2 | lysm domain GPI-anchored protein 2 precursor | chr2:7459156-7460648 FORWARD LENGTH=350	5	5	17.1	17.1	37.739	0	119.37	103	199620000	211780000	152180000	262810000	181900000	253210000	214530000	241260000	191350000	198420000	210310000	331590000	193720000	219490000	250630000	199510000	238710000	188360000	O23006	350	0
AT2G18370	AT2G18370.1	AT2G18370.1 | Symbols: | Bifunctional inhibitor/lipid-transfer protein/seed storage 2S albumin superfamily protein | chr2:7980687-7981475 FORWARD LENGTH=116	3	3	44	44	11.789	0	28.338	58	291420000	492850000	179900000	505990000	240610000	730880000	285850000	539730000	580530000	361090000	333890000	242350000	122700000	NA	NA	NA	NA	NA	Q9ZPW9	116	0
AT2G19760	AT2G19760.1	AT2G19760.1 | Symbols: PFN1, PRF1 | profilin 1 | chr2:8517074-8518067 REVERSE LENGTH=131	7	4	40.5	32.8	14.266	0	13.565	118	NA	NA	NA	145890000	229390000	253440000	406360000	516650000	323380000	769180000	823930000	283400000	473370000	462070000	394360000	376730000	390390000	341170000	Q42449	131	0
AT2G22170	AT2G22170.1	AT2G22170.1 | Symbols: | Lipase/lipooxygenase, PLAT/LH2 family protein | chr2:9427010-9427742 REVERSE LENGTH=183	3	2	14.8	9.3	20.129	0	4.5099	20	NA	NA	NA	NA	47907000	NA	NA	NA	NA	85364000	133070000	NA	51007000	80901000	NA	NA	73133000	NA	Q9SIE7	183	0
AT2G24940	AT2G24940.1	AT2G24940.1 | Symbols: AtMAPR2, MAPR2 | membrane-associated progesterone binding protein 2 | chr2:10609447-10609749 FORWARD LENGTH=100	5	5	46	46	11.031	0	303.99	291	1170000000	1242300000	1211500000	1350500000	1115900000	1429600000	1232500000	1442900000	1089800000	912350000	1216800000	1460600000	832900000	998060000	778540000	1036800000	888310000	908400000	Q9SK39	100	0
AT2G31670	AT2G31670.1	AT2G31670.1 | Symbols: | Stress responsive alpha-beta barrel domain protein | chr2:13472699-13473490 REVERSE LENGTH=263	5	5	20.9	20.9	28.865	0	83.338	27	NA	NA	NA	NA	53976000	32795000	33868000	47118000	NA	NA	NA	NA	43883000	55608000	44342000	46464000	46581000	34698000	Q9SIP1	263	0
AT2G36530	AT2G36530.1	AT2G36530.1 | Symbols: LOS2, ENO2 | Enolase | chr2:15321081-15323786 REVERSE LENGTH=444	11	11	37.6	37.6	47.719	0	100.8	140	99770000	NA	343560000	211130000	207990000	365540000	240410000	310280000	177780000	236170000	242020000	300260000	367010000	188190000	179150000	210240000	190220000	219860000	P25696	444	0
AT2G38230	AT2G38230.1	AT2G38230.1 | Symbols: ATPDX1.1, PDX1.1 | pyridoxine biosynthesis 1.1 | chr2:16011475-16012404 FORWARD LENGTH=309	4	3	13.9	11.3	32.862	0	14.965	33	NA	NA	NA	NA	NA	NA	NA	NA	NA	45326000	54378000	NA	85898000	33831000	44917000	59047000	41210000	98360000	O80448	309	0
AT2G38380	AT2G38380.1;AT2G38390.1	AT2G38380.1 | Symbols: | Peroxidase superfamily protein | chr2:16076443-16078314 FORWARD LENGTH=349;AT2G38390.1 | Symbols: | Peroxidase superfamily protein | chr2:16079726-16081381 FORWARD LENGTH=349	3	2	7.4	4.6	38.108	0.00075415	2.3586	8	NA	NA	NA	NA	NA	NA	NA	NA	NA	NA	NA	NA	NA	NA	NA	135300000	125490000	128970000	P24102	349	0
AT2G38530	AT2G38530.1	AT2G38530.1 | Symbols: LTP2, LP2, cdf3 | lipid transfer protein 2 | chr2:16128481-16128948 FORWARD LENGTH=118	6	5	52.5	46.6	11.938	0	167.24	197	11400000000	9240800000	8597800000	1288800000	484940000	3289300000	967290000	1054700000	878250000	869900000	672550000	3178100000	899250000	1001600000	1194300000	2037500000	911970000	1608500000	Q9S7I3	118	0
AT2G38540	AT2G38540.1	AT2G38540.1 | Symbols: LP1, LTP1, ATLTP1 | lipid transfer protein 1 | chr2:16130418-16130893 FORWARD LENGTH=118	5	5	36.4	36.4	11.755	0	42.499	82	NA	NA	NA	107960000	77166000	226000000	134310000	112720000	147000000	138570000	116700000	745990000	342210000	389850000	320480000	1103900000	408480000	992870000	Q42589	118	0
AT2G40880	AT2G40880.1	AT2G40880.1 | Symbols: FL3-27, ATCYSA, CYSA | cystatin A | chr2:17057463-17057930 FORWARD LENGTH=125	2	2	16.8	16.8	14.421	0	7.0735	8	NA	NA	NA	NA	NA	NA	NA	NA	NA	NA	NA	NA	NA	NA	NA	39228000	NA	44126000	Q41906	125	0
AT2G43510	AT2G43510.1	AT2G43510.1 | Symbols: ATTI1, TI1 | trypsin inhibitor protein 1 | chr2:18067211-18067620 FORWARD LENGTH=89	2	2	25.8	25.8	9.8854	0	7.5517	63	NA	NA	NA	97739000	99562000	92764000	109720000	96727000	65377000	48703000	83862000	79216000	54257000	62517000	54608000	82661000	67424000	NA	Q42328	89	0
AT2G43520	AT2G43520.1	AT2G43520.1 | Symbols: ATTI2, TI2 | trypsin inhibitor protein 2 | chr2:18068611-18069037 FORWARD LENGTH=90	2	2	24.4	24.4	9.6604	0	15.959	49	492040000	589480000	696680000	NA	NA	86192000	NA	25677000	47154000	NA	NA	38162000	NA	NA	NA	NA	NA	NA	O22866	90	0
AT2G43535	AT2G43535.1	AT2G43535.1 | Symbols: | Scorpion toxin-like knottin superfamily protein | chr2:18071130-18071560 FORWARD LENGTH=97	3	3	30.9	30.9	10.671	0	15.727	110	176750000	168730000	139010000	178040000	105720000	223530000	392160000	374300000	282350000	258910000	318650000	303320000	333740000	409740000	319790000	520440000	342190000	385460000	Q8RYE7	97	0
AT2G44920	AT2G44920.2;AT2G44920.1	AT2G44920.2 | Symbols: | Tetratricopeptide repeat (TPR)-like superfamily protein | chr2:18524419-18526502 FORWARD LENGTH=224;AT2G44920.1 | Symbols: | Tetratricopeptide repeat (TPR)-like superfamily protein | chr2:18524419-18526236 FORWARD LENGTH=210	8	8	47.3	47.3	23.778	0	220.89	200	NA	NA	NA	NA	NA	NA	55555000	135690000	45907000	312010000	311260000	342460000	574160000	632350000	509750000	929760000	876460000	811840000	O22160	224	0
AT2G47470	AT2G47470.3;AT2G47470.1;AT2G47470.4;AT2G47470.2	AT2G47470.3 | Symbols: ATPDIL2-1, UNE5, MEE30, PDI11, ATPDI11 | thioredoxin family protein | chr2:19481503-19483571 FORWARD LENGTH=323;AT2G47470.1 | Symbols: ATPDIL2-1, UNE5, MEE30, PDI11, ATPDI11 | thioredoxin family protein | chr2:19481503-19483683 FORWA	11	11	44	44	35.62	0	41.301	178	NA	NA	149930000	217620000	230070000	464980000	306220000	304670000	306040000	352310000	311200000	323520000	206830000	231880000	260220000	194680000	227420000	197860000	O22263	361	0
AT3G04720	AT3G04720.1	AT3G04720.1 | Symbols: PR4, HEL, PR-4 | pathogenesis-related 4 | chr3:1285691-1286531 REVERSE LENGTH=212	4	4	25.9	25.9	22.936	0	16.632	73	107350000	68369000	95449000	167980000	155070000	225090000	146930000	166820000	146010000	80182000	74128000	174050000	82681000	NA	NA	131860000	81291000	107160000	P43082	212	0
AT3G06035	AT3G06035.1	AT3G06035.1 | Symbols: | Glycoprotein membrane precursor GPI-anchored | chr3:1823172-1824110 REVERSE LENGTH=200	2	2	12	12	22.053	0	29.577	23	NA	NA	NA	68996000	62184000	55084000	49550000	50783000	63072000	27124000	39645000	70370000	NA	NA	NA	NA	NA	NA	Q84MC0	200	0
AT3G08770	AT3G08770.1;AT3G08770.2	AT3G08770.1 | Symbols: LTP6 | lipid transfer protein 6 | chr3:2664349-2664784 REVERSE LENGTH=113;AT3G08770.2 | Symbols: LTP6 | lipid transfer protein 6 | chr3:2664330-2664784 REVERSE LENGTH=117	2	2	19.5	19.5	11.878	0	7.5326	34	NA	NA	NA	NA	35863000	46870000	70212000	57327000	57350000	44309000	42515000	62916000	59321000	60431000	59827000	103070000	89250000	104120000	Q9LDB4	113	0
AT3G09820	AT3G09820.2;AT3G09820.1;AT5G03300.1	AT3G09820.2 | Symbols: ADK1 | adenosine kinase 1 | chr3:3012645-3014624 FORWARD LENGTH=302;AT3G09820.1 | Symbols: ADK1, ATADK1 | adenosine kinase 1 | chr3:3012122-3014624 FORWARD LENGTH=344;AT5G03300.1 | Symbols: ADK2 | adenosine kinase 2 | chr5:796573-798	8	8	34.4	34.4	33.326	0	53.245	33	NA	NA	NA	NA	NA	NA	NA	64310000	NA	65797000	56019000	66284000	109510000	NA	NA	66143000	63920000	68940000	Q9SF85	344	0
AT3G10920	AT3G10920.2;AT3G10920.1	AT3G10920.2 | Symbols: MSD1 | manganese superoxide dismutase 1 | chr3:3418015-3419581 FORWARD LENGTH=230;AT3G10920.1 | Symbols: MSD1, MEE33, ATMSD1 | manganese superoxide dismutase 1 | chr3:3418015-3419581 FORWARD LENGTH=231	7	7	31.7	31.7	25.344	0	109.11	77	NA	NA	NA	NA	NA	NA	58821000	49782000	56513000	338300000	286970000	32867000	140800000	261010000	234490000	131010000	154040000	155370000	O81235	231	0
AT3G14415	AT3G14415.3;AT3G14415.1;AT3G14415.2	AT3G14415.3 | Symbols: | Aldolase-type TIM barrel family protein | chr3:4818667-4820748 FORWARD LENGTH=367;AT3G14415.1 | Symbols: | Aldolase-type TIM barrel family protein | chr3:4818667-4820748 FORWARD LENGTH=367;AT3G14415.2 | Symbols: | Aldolase-type	6	2	15.5	3	40.306	0	11.632	26	NA	NA	NA	NA	NA	NA	NA	NA	NA	NA	NA	NA	184110000	37392000	NA	110530000	52325000	96074000	Q9LRS0	367	0
AT3G18420	AT3G18420.1	AT3G18420.1 | Symbols: | Protein prenylyltransferase superfamily protein | chr3:6324771-6325721 REVERSE LENGTH=316	3	3	15.5	15.5	35.63	0	17.547	25	NA	NA	NA	38083000	NA	104300000	42161000	47828000	35612000	57958000	55591000	68881000	38362000	42763000	NA	NA	NA	NA	Q9LS48	316	0
AT3G18780	AT3G18780.1;AT3G18780.2;AT1G49240.1	AT3G18780.1 | Symbols: ACT2, DER1, LSR2, ENL2 | actin 2 | chr3:6475535-6476728 FORWARD LENGTH=371;AT3G18780.2 | Symbols: ACT2, DER1, LSR2, ENL2 | actin 2 | chr3:6475535-6476832 FORWARD LENGTH=377;AT1G49240.1 | Symbols: ACT8 | actin 8 | chr1:18216539-182179	5	2	17.8	7.8	41.232	0	12.787	39	NA	NA	NA	53731000	NA	193280000	51563000	102840000	NA	109430000	112700000	282300000	186820000	NA	NA	NA	110880000	NA	Q96292	377	0
AT3G20390	AT3G20390.1	AT3G20390.1 | Symbols: | endoribonuclease L-PSP family protein | chr3:7110227-7111695 REVERSE LENGTH=187	11	11	62.6	62.6	19.816	0	115.31	323	742440000	761610000	829570000	1352200000	839570000	2127700000	1056500000	923570000	1211700000	569330000	565790000	2401400000	571320000	460010000	484640000	1282100000	755550000	1066900000	Q94JQ4	187	0
[truncated: 113 more rows]

## Sheet: Supplemental Table S7
Supplemental Table S7: LFQ intensities and disorder content of LEA proteins found in heat-stable proteome in dry seeds (DS), germinating seeds and seedlings at indicated time points after imbibition. Raw data were processed using MaxQuant and annotated with TAIR10 annotations. Disorder contents were determined using MFDp2 based on the sequence of proteins retrieved from UniprotKB/Swiss-Prot. NA d…
[truncated: 32 more rows]

[truncated: 4 more sheets: Supplemental Table S8, Supplemental Table S9, Supplemental Table S10, Supplemental Table S11]
